# Supplementary material for: Children's height and weight in rural and urban populations in low-income and middle-income countries: a systematic analysis of population-representative data
Source: PubMed Central journal article supplement (PMC4547325; doi:10.1016/s2214-109x(13)70109-8), 2013-11

## Supplementary appendix

This appendix formed part of the original submission and has been peer reviewed. We post it as supplied by the authors.

Supplement to: Paciorek CJ, Stevens GA, Finucane MM, Majid Ezzati, on behalf of the Nutrition Impact Model Study Group (Child Growth). Children's height and weight in rural and urban populations in low-income and middle-income countries: a systematic analysis of population-representative data. *Lancet Glob Health* 2013; **1**: e300–09.

**Appendix Table 1.** List of countries and territories in each region.

| <b>Region</b>                                  | <b>Countries</b>                                                                                                                                                                                                                                                                                                                                                                                                                                                                                                                                          |
|------------------------------------------------|-----------------------------------------------------------------------------------------------------------------------------------------------------------------------------------------------------------------------------------------------------------------------------------------------------------------------------------------------------------------------------------------------------------------------------------------------------------------------------------------------------------------------------------------------------------|
| East and Southeast Asia                        | Cambodia, China, China (Hong Kong SAR), China (Macao SAR), Democratic People's Republic of Korea, Indonesia, Lao People's Democratic Republic, Malaysia, Maldives, Myanmar, Philippines, Sri Lanka, Taiwan, Thailand, Timor-Leste, Viet Nam                                                                                                                                                                                                                                                                                                               |
| Oceania                                        | Fiji, Kiribati, Marshall Islands, Micronesia (Federated States of), Papua New Guinea, Samoa, Solomon Islands, Tonga, Vanuatu                                                                                                                                                                                                                                                                                                                                                                                                                              |
| South Asia                                     | Afghanistan, Bangladesh, Bhutan, India, Nepal, Pakistan                                                                                                                                                                                                                                                                                                                                                                                                                                                                                                   |
| Central Asia, Middle East, and North Africa    | Algeria, Armenia, Azerbaijan, Bahrain, Egypt, Georgia, Iran (Islamic Republic of), Iraq, Jordan, Kazakhstan, Kuwait, Kyrgyzstan, Lebanon, Libyan Arab Jamahiriya, Mongolia, Morocco, Occupied Palestinian Territory, Oman, Qatar, Saudi Arabia, Syrian Arab Republic, Tajikistan, Tunisia, Turkey, Turkmenistan, United Arab Emirates, Uzbekistan, Yemen                                                                                                                                                                                                  |
| Sub-Saharan Africa                             | Angola, Benin, Botswana, Burkina Faso, Burundi, Cameroon, Cape Verde, Central African Republic, Chad, Comoros, Congo, Côte d'Ivoire, Democratic Republic of the Congo, Djibouti, Equatorial Guinea, Eritrea, Ethiopia, Gabon, Gambia, Ghana, Guinea, Guinea-Bissau, Kenya, Lesotho, Liberia, Madagascar, Malawi, Mali, Mauritania, Mauritius, Mozambique, Namibia, Niger, Nigeria, Rwanda, Senegal, Seychelles, Sierra Leone, Somalia, South Africa, Sudan, Swaziland, São Tomé and Príncipe, Togo, Uganda, United Republic of Tanzania, Zambia, Zimbabwe |
| Andean and Central Latin America and Caribbean | Antigua and Barbuda, Bahamas, Barbados, Belize, Bermuda, Bolivia, Colombia, Costa Rica, Cuba, Dominica, Dominican Republic, Ecuador, El Salvador, Grenada, Guatemala, Guyana, Haiti, Honduras, Jamaica, Mexico, Nicaragua, Panama, Peru, Puerto Rico, Saint Lucia, Saint Vincent and the Grenadines, Suriname, Trinidad and Tobago, Venezuela (Bolivarian Republic of)                                                                                                                                                                                    |
| Southern and Tropical Latin America            | Argentina, Brazil, Chile, Paraguay, Uruguay                                                                                                                                                                                                                                                                                                                                                                                                                                                                                                               |

**Appendix Table 2.** Data sources used in the analysis and their characteristics.

| Country     | Year | Age range | Administrative level | Sample size | Indicators | Notes* | Survey (when individual level data available) or source (when summary statistics available)                                                                                                                                                                                                                 |
|-------------|------|-----------|----------------------|-------------|------------|--------|-------------------------------------------------------------------------------------------------------------------------------------------------------------------------------------------------------------------------------------------------------------------------------------------------------------|
| Afghanistan | 1995 | 0-59.99   | Regional             | 1674        | HAZ, WAZ   | 3,5    | Kakar F and Kakar SR. Indicators of child morbidity and mortality in three Afghan provinces. The Research and Advisory Council of Afghanistan and UNICEF Afghanistan Program Office. Kabul, Afghanistan, 1996.                                                                                              |
| Afghanistan | 1997 | 6-59.99   | National             | 4846        | HAZ, WAZ   | 3,5    | Afghanistan 1997 multiple indicator baseline (MICS). Report to UNICEF. Acapulco: Centro de Investigacion de Enfermedades Tropicales (CIET), 1998 (and additional analysis).                                                                                                                                 |
| Afghanistan | 2000 | 0-59.99   | Regional (rural)     | 638         | HAZ, WAZ   | 3,5    | Afghanistan MICS2 Steering Committee. 2000 Afghanistan multiple indicator cluster survey (MICS2) Vol.1: Situation analysis of children and women in the east of Afghanistan. ICONS, SHAIIP Islamabad, Deutsche Gesellschaft für Technische Zusammenarbeit GmbH, UNICEF Afghanistan, 2001.                   |
| Afghanistan | 2000 | 6-59.99   | First admin level    | 5499        | HAZ, WAZ   | 3,5    | Lukmanji Z and Hamidzai A. Nutrition survey of children under five years: Province of Badakshan, Afghanistan, January 2000. FOCUS Humanitarian Assistance Europe Foundation and Department of Health, Province of Badakshan, Afghanistan. FOCUS Europa Foundation, May 2000.                                |
| Afghanistan | 2002 | 0-59.99   | First admin level    | 676         | HAZ, WAZ   | 3,5    | Tohill UR. GOAL Samangan Province, nutrition survey, May - June 2002. GOAL report No. 2. GOAL Afghanistan, 2002.                                                                                                                                                                                            |
| Afghanistan | 2002 | 0-59.99   | First admin level    | 717         | HAZ, WAZ   | 3,5    | Tohill UR. GOAL Jawzjan Province, nutrition survey, April 2002. GOAL report No. 1. GOAL Afghanistan, 2002.                                                                                                                                                                                                  |
| Afghanistan | 2002 | 0-59.99   | First admin level    | 545         | HAZ, WAZ   | 3,5    | Woodruff BA, Reynolds M, Tchibindat F, Ahimana C. Nutrition and health survey, Badghis Province, Afghanistan, February - March 2002. UNICEF and U.S. Centers for Disease Control and Prevention (CDC), 2002.                                                                                                |
| Afghanistan | 2004 | 6-59.99   | National             | 946         | HAZ, WAZ   | 2      | Ministry of Public Health (Afghanistan), UNICEF, CDC, National Institute for Research on Food and Nutrition (Italy), Tufts University. Summary report of the national nutrition survey, 2004. Kabul, Islamic Republic of Afghanistan: Ministry of Public Health and UNICEF, 2005 (and additional analysis). |
| Algeria     | 1992 | 0-59.99   | National             | 4207        | HAZ, WAZ   | 1      | PAPCHILD Algeria                                                                                                                                                                                                                                                                                            |
| Algeria     | 1995 | 0-59.99   | National             | 3824        | HAZ, WAZ   | 2      | Ministère de la Santé et de la Population. Enquête nationale sur les objectifs de la mi-décennie, "MDG Algérie", 1995. Alger, Algeria, 1996 (and additional analysis).                                                                                                                                      |
| Algeria     | 2000 | 0-59.99   | National             | 4178        | HAZ, WAZ   | 2      | Ministère de la Santé et de la Population. Enquête nationale sur les objectives de la fin décennie santé mère et enfant EDG Algérie 2000 (MICS). Institut National de Santé Publique. République Algérienne Démocratique et Populaire, 2001 (and additional analysis).                                      |
| Algeria     | 2002 | 0-59.99   | National             | 4419        | HAZ, WAZ   | 2      | Ministère de la Santé, de la Population et de la Réforme Hospitalière et l'Office National des Statistiques. Enquête Algérienne sur la santé de la famille-2002: Rapport principal. Alger, Algérie: Agence Nationale de la Documentation en Santé, 2004 (and additional analysis).                          |

|            |           |         |                   |       |          |     |                                                                                                                                                                                                                                                                                                                                                                                                                                                                                                                          |
|------------|-----------|---------|-------------------|-------|----------|-----|--------------------------------------------------------------------------------------------------------------------------------------------------------------------------------------------------------------------------------------------------------------------------------------------------------------------------------------------------------------------------------------------------------------------------------------------------------------------------------------------------------------------------|
| Algeria    | 2005      | 0-59.99 | National          | 13975 | HAZ, WAZ | 2   | Ministère de la Santé de la Population et de la Réforme Hospitalière, Office National des Statistiques. Suivi de la situation des enfant et des femmes. Enquête nationale à indicateurs multiples: Rapport principal. MICS3. République Algérienne Démocratique et Populaire, Décembre 2008 (and additional analysis). Inquerito de indicadores multiplos (MICS) 1996. Instituto Nacional de Estatistica - Gabinete de Monitorização das Condições de Vida da População. Luanda, Angola, 1999 (and additional analysis). |
| Angola     | 1996      | 6-59.99 | National          | 3016  | HAZ, WAZ | 2   |                                                                                                                                                                                                                                                                                                                                                                                                                                                                                                                          |
| Angola     | 2001      | 0-59.99 | National          | 5106  | HAZ, WAZ | 1   | MICS                                                                                                                                                                                                                                                                                                                                                                                                                                                                                                                     |
| Angola     | 2007      | 6-59.99 | National          | 10224 | HAZ, WAZ | 3   | Ministerio da Saude. Relatorio do inquerito sobre a nutrição em Angola 2007. Luanda, Republica de Angola: Ministerio da Saude, Direcção nacional de Saude Publica, 2008. Calvo EB, Islam J, Gnazzo N, Ibanez M, de Martinez CB, de Vacaliuc RS et al. [Encuesta nutricional en niños de 2 años de la provincia de Misiones. I. Indicadores antropometricos.] Archivos Argentinos de Pediatría 1987;85:247-269.                                                                                                           |
| Argentina  | 1985-1986 | 9-23.99 | First admin level | 430   | HAZ, WAZ | 3,5 | Calvo EB. Encuesta antropometrica de niños menores de 6 años. En: Infancia y condiciones de vida. Encuesta especial para el diagnostico y la evaluacion de las metas sociales. Publicacion INDEC, Buenos Aires, 1995 (and additional analysis).                                                                                                                                                                                                                                                                          |
| Argentina  | 1994      | 0-59.99 | Regional (urban)  | 3967  | HAZ, WAZ | 2,5 |                                                                                                                                                                                                                                                                                                                                                                                                                                                                                                                          |
| Argentina  | 1994      | 0-59.99 | National          | 5296  | HAZ, WAZ | 3,5 | Lejarraga H, Krupitzky S, Gimenez E, Diament N, Kelmansky A, Tibaldi F, et al. The organisation of a national survey for evaluating child psychomotor development in Argentina. Paediatric and Perinatal Epidemiology 1997;11:359-373 (and additional analysis).                                                                                                                                                                                                                                                         |
| Argentina  | 2004-2005 | 6-59.99 | National          | 44731 | HAZ, WAZ | 2   | Durán P, Mangialavori G, Biglieri A, Kogan L, Gilardon EA. Nutrition status in Argentinean children 6 to 72 months old. Results from the National Nutrition and Health Survey (ENNyS). Archivos Argentinos de Pediatría 2009;107:397-404 (and additional analysis).                                                                                                                                                                                                                                                      |
| Armenia    | 1998      | 0-59.99 | National          | 3241  | HAZ, WAZ | 2   | The health and nutritional status of children and women in Armenia. National Institute of Nutrition - Italy, 1998 (and additional analysis).                                                                                                                                                                                                                                                                                                                                                                             |
| Armenia    | 2000      | 0-59.99 | National          | 1508  | HAZ, WAZ | 1   | DHS                                                                                                                                                                                                                                                                                                                                                                                                                                                                                                                      |
| Armenia    | 2005      | 0-59.99 | National          | 1231  | HAZ, WAZ | 1   | DHS                                                                                                                                                                                                                                                                                                                                                                                                                                                                                                                      |
| Armenia    | 2010      | 0-59.99 | National          | 1305  | HAZ, WAZ | 1   | DHS                                                                                                                                                                                                                                                                                                                                                                                                                                                                                                                      |
| Azerbaijan | 1996      | 6-59.99 | National          | 500   | HAZ, WAZ | 3,5 | Branca F, Burkholder B, Hamel M, Parvanta I, Robertson A. Health and nutrition survey of internally displaced and resident population of Azerbaijan - April 1996. Baku, Azerbaijan, 1996 (and additional analysis).                                                                                                                                                                                                                                                                                                      |
| Azerbaijan | 2000      | 0-59.99 | National          | 1716  | HAZ, WAZ | 1   | MICS                                                                                                                                                                                                                                                                                                                                                                                                                                                                                                                     |
| Azerbaijan | 2001      | 3-59.99 | National          | 2426  | HAZ, WAZ | 3,5 | Adventist Development and Relief Agency, Azerbaijan Ministry of Health, State Committee of Statistics, Mercy Corps [Baku, Azerbaijan], DRH/CDC, USAID, UNFPA, UNHCR. Reproductive health survey Azerbaijan, 2001: Final report. Serbanescu F, Morris L, Rahimova S, Stupp P, eds. Atlanta, GA: US Department of Health and Human Services, CDC, 2003 (and additional analysis).                                                                                                                                          |

|            |           |         |                  |       |          |     |                                                                                                                                                                                                                                                  |
|------------|-----------|---------|------------------|-------|----------|-----|--------------------------------------------------------------------------------------------------------------------------------------------------------------------------------------------------------------------------------------------------|
| Azerbaijan | 2006      | 0-59.99 | National         | 1925  | HAZ, WAZ | 1   | DHS                                                                                                                                                                                                                                              |
| Bahrain    | 1989      | 0-59.99 | National         | 2033  | HAZ, WAZ | 3,5 | Ministry of Health. Bahrain child health survey 1989. Manama, Bahrain, 1992.                                                                                                                                                                     |
| Bahrain    | 1995      | 0-59.99 | National         | 673   | HAZ, WAZ | 3,5 | Naseeb T and Farid SM. Bahrain family health survey 1995: principal report. Manama, Bahrain: Ministry of Health, 2000.                                                                                                                           |
| Bangladesh | 1985-1986 | 6-59.99 | National         | 2675  | HAZ, WAZ | 3,5 | Government of the Peoples's Republic of Bangladesh. Report of the child nutrition status module, Bangladesh household expenditure survey 1985-86. Bangladesh bureau of statistics. Dhaka, Bangladesh, 1987 (and additional analysis).            |
| Bangladesh | 1989-1990 | 6-59.99 | National         | 1914  | HAZ, WAZ | 3,5 | Government of the People's Republic of Bangladesh. Report of the child nutrition status survey 1989-90. Bangladesh bureau of statistics. Dhaka, Bangladesh, 1991 (and additional analysis).                                                      |
| Bangladesh | 1991      | 6-59.99 | Regional (rural) | 32493 | HAZ, WAZ | 2   | Helen Keller International (HKI) Bangladesh. Nutritional Surveillance Project 1991: data on rural national (using the WHO Child Growth Standards). Unpublished estimates. Dhaka, Bangladesh: HKI and Institute of Public Health Nutrition, 2008. |
| Bangladesh | 1992      | 6-59.99 | Regional (rural) | 36997 | HAZ, WAZ | 2   | Helen Keller International (HKI) Bangladesh. Nutritional Surveillance Project 1992: data on rural national (using the WHO Child Growth Standards). Unpublished estimates. Dhaka, Bangladesh: HKI and Institute of Public Health Nutrition, 2008. |
| Bangladesh | 1993      | 6-59.99 | Regional (rural) | 42826 | HAZ, WAZ | 2   | Helen Keller International (HKI) Bangladesh. Nutritional Surveillance Project 1993: data on rural national (using the WHO Child Growth Standards). Unpublished estimates. Dhaka, Bangladesh: HKI and Institute of Public Health Nutrition, 2008. |
| Bangladesh | 1994      | 6-59.99 | Regional (rural) | 63753 | HAZ, WAZ | 2   | Helen Keller International (HKI) Bangladesh. Nutritional Surveillance Project 1994: data on rural national (using the WHO Child Growth Standards). Unpublished estimates. Dhaka, Bangladesh: HKI and Institute of Public Health Nutrition, 2008. |
| Bangladesh | 1995      | 6-59.99 | Regional (rural) | 87051 | HAZ, WAZ | 2   | Helen Keller International (HKI) Bangladesh. Nutritional Surveillance Project 1995: data on rural national (using the WHO Child Growth Standards). Unpublished estimates. Dhaka, Bangladesh: HKI and Institute of Public Health Nutrition, 2008. |
| Bangladesh | 1996-1997 | 0-59.99 | National         | 4672  | HAZ, WAZ | 1   | DHS                                                                                                                                                                                                                                              |
| Bangladesh | 1996      | 6-59.99 | Regional (rural) | 81067 | HAZ, WAZ | 2   | Helen Keller International (HKI) Bangladesh. Nutritional Surveillance Project 1996: data on rural national (using the WHO Child Growth Standards). Unpublished estimates. Dhaka, Bangladesh: HKI and Institute of Public Health Nutrition, 2008. |
| Bangladesh | 1998      | 6-59.99 | National (rural) | 49496 | HAZ, WAZ | 2   | Helen Keller International (HKI) Bangladesh. Nutritional Surveillance Project 1998: data on rural national (using the WHO Child Growth Standards). Unpublished estimates. Dhaka, Bangladesh: HKI and Institute of Public Health Nutrition, 2008. |

|            |           |         |                  |       |          |     |                                                                                                                                                                                                                                                                                 |
|------------|-----------|---------|------------------|-------|----------|-----|---------------------------------------------------------------------------------------------------------------------------------------------------------------------------------------------------------------------------------------------------------------------------------|
| Bangladesh | 1999      | 6-59.99 | National (rural) | 49374 | HAZ, WAZ | 2   | Helen Keller International (HKI) Bangladesh. Nutritional Surveillance Project 1999: data on rural national (using the WHO Child Growth Standards). Unpublished estimates. Dhaka, Bangladesh: HKI and Institute of Public Health Nutrition, 2008.                                |
| Bangladesh | 1999-2000 | 0-59.99 | National         | 5302  | HAZ, WAZ | 1   | DHS                                                                                                                                                                                                                                                                             |
| Bangladesh | 2000      | 0-59.99 | National (rural) | 63632 | HAZ, WAZ | 2   | Helen Keller International (HKI) Bangladesh. Nutritional Surveillance Project 2000: data on rural national (using the WHO Child Growth Standards). Unpublished estimates. Dhaka, Bangladesh: HKI and Institute of Public Health Nutrition, 2008.                                |
| Bangladesh | 2001      | 0-59.99 | National (rural) | 63445 | HAZ, WAZ | 2   | Helen Keller International (HKI) Bangladesh. Nutritional Surveillance Project 2001: data on rural national (using the WHO Child Growth Standards). Unpublished estimates. Dhaka, Bangladesh: HKI and Institute of Public Health Nutrition, 2008.                                |
| Bangladesh | 2002      | 0-59.99 | National (rural) | 53314 | HAZ, WAZ | 2   | Helen Keller International (HKI) Bangladesh. Nutritional Surveillance Project 2002: data on rural national (using the WHO Child Growth Standards). Unpublished estimates. Dhaka, Bangladesh: HKI and Institute of Public Health Nutrition, 2008.                                |
| Bangladesh | 2003      | 0-59.99 | National (rural) | 86998 | HAZ, WAZ | 2   | Helen Keller International (HKI) Bangladesh. Nutritional Surveillance Project 2003: data on rural national (using the WHO Child Growth Standards). Unpublished estimates. Dhaka, Bangladesh: HKI and Institute of Public Health Nutrition, 2008.                                |
| Bangladesh | 2004      | 0-59.99 | National (rural) | 73690 | HAZ, WAZ | 2   | Helen Keller International (HKI) Bangladesh. Nutritional Surveillance Project 2004: data on rural national (using the WHO Child Growth Standards). Unpublished estimates. Dhaka, Bangladesh: HKI and Institute of Public Health Nutrition, 2008.                                |
| Bangladesh | 2004      | 0-59.99 | National         | 5895  | HAZ, WAZ | 1   | DHS                                                                                                                                                                                                                                                                             |
| Bangladesh | 2005      | 0-59.99 | National (rural) | 74758 | HAZ, WAZ | 2   | Helen Keller International (HKI) and Institute of Public Health Nutrition. Nutritional Surveillance Project 2005: Rural data (using the WHO Child Growth Standards). Unpublished estimates. Dhaka, Bangladesh: HKI and Institute of Public Health Nutrition, 2007.              |
| Bangladesh | 2006      | 0-59.99 | National (rural) | 24302 | HAZ, WAZ | 2   | Helen Keller International (HKI) Bangladesh. Nutritional Surveillance Project 2006: data on rural national data (using the WHO Child Growth Standards). Unpublished estimates. Dhaka, Bangladesh: HKI and Institute of Public Health Nutrition, 2008 (and additional analysis). |
| Bangladesh | 2007      | 0-59.99 | National         | 5263  | HAZ, WAZ | 1   | DHS                                                                                                                                                                                                                                                                             |
| Belize     | 1992      | 0-59.99 | National         | 8516  | WAZ      | 3,5 | Ministry of Health. Assessment of the food, nutrition and health situation of Belize. INCAP Publication DC1/002. Kingston: Institute of Nutrition of Central America and Panama, 1992 (and additional analysis).                                                                |
| Belize     | 2006      | 0-59.99 | National         | 686   | HAZ, WAZ | 1   | MICS                                                                                                                                                                                                                                                                            |
| Benin      | 1996      | 0-35.99 | National         | 2521  | HAZ, WAZ | 1   | DHS                                                                                                                                                                                                                                                                             |
| Benin      | 2001      | 0-59.99 | National         | 4374  | HAZ, WAZ | 1   | DHS                                                                                                                                                                                                                                                                             |
| Benin      | 2006      | 0-59.99 | National         | 12149 | HAZ, WAZ | 1   | DHS                                                                                                                                                                                                                                                                             |



|          |           |         |                   |       |          |       |                                                                                                                                                                                                                                  |
|----------|-----------|---------|-------------------|-------|----------|-------|----------------------------------------------------------------------------------------------------------------------------------------------------------------------------------------------------------------------------------|
| Bhutan   | 1999      | 6-59.99 | National          | 2996  | HAZ, WAZ | 2     | Ministry of Health and Education. National anthropometric survey of under five children in Bhutan. Division of Health Services. Thimphu, Bhutan, 1999 (and additional analysis).                                                 |
| Bhutan   | 2008      | 6-59.99 | National          | 2348  | HAZ, WAZ | 2     | Ministry of Health, National Statistics Bureau and Centre for Research Initiative. National nutrition, infant & young child feeding survey 2008. Thimphu, Bhutan: Ministry of Health and UNICEF, 2009 (and additional analysis). |
| Bhutan   | 2010      | 0-59.99 | National          | 6071  | HAZ, WAZ | 2     | National Statistics Bureau (NSB). Bhutan multiple indicator cluster survey (BMIS) 2010. Thimphu, Bhutan: NSB, May 2011.                                                                                                          |
| Bolivia  | 1989      | 3-35.99 | National          | 2603  | HAZ, WAZ | 1     | DHS                                                                                                                                                                                                                              |
| Bolivia  | 1990      | 0-59.99 | First admin level | 89490 | WAZ      | 3,5   | Ministerio de Prevision Social y Salud Publica. Santa Cruz: estado nutricional de la poblacion menor de cinco anos. Boletin de Sistema de Vigilancia Epidemiologica Nutricional 1991;5(3):1-3.                                   |
| Bolivia  | 1993-1994 | 0-35.99 | National          | 2867  | HAZ, WAZ | 1     | DHS                                                                                                                                                                                                                              |
| Bolivia  | 1996      | 0-59.99 | National          | 1302  | HAZ, WAZ | 3,5   | Gutierrez Sardan M. Encuesta nacional de multiples indicadores 1996 (MICS). La Paz: Ministerio de Desarrollo Humano, enero 1997 (and additional analysis).                                                                       |
| Bolivia  | 1998      | 0-59.99 | National          | 6139  | HAZ, WAZ | 1     | DHS                                                                                                                                                                                                                              |
| Bolivia  | 2003-2004 | 0-59.99 | National          | 9091  | HAZ, WAZ | 1     | DHS                                                                                                                                                                                                                              |
| Bolivia  | 2008      | 0-59.99 | National          | 7672  | HAZ, WAZ | 1     | DHS                                                                                                                                                                                                                              |
| Botswana | 1996      | 0-59.99 | National          | NR    | HAZ, WAZ | 3,5,7 | The 1996 Botswana family health survey III. Gaborone: Central Statistics Office, 1999 (and additional analysis).                                                                                                                 |
| Botswana | 2000      | 0-59.99 | National          | 2880  | HAZ, WAZ | 2     | Charumbira Multiple indicator survey (MIS) 2000. Full report. Gaborone, Botswana, 2001 (and additional analysis).                                                                                                                |
| Botswana | 2007-2008 | 0-59.99 | National          | 2623  | HAZ, WAZ | 2     | 2007 Botswana family health survey IV report. Gaborone, Botswana: CSO, 2009 (and additional analysis by UNICEF).                                                                                                                 |
| Brazil   | 1986      | 0-59.99 | National          | 1167  | HAZ, WAZ | 1     | DHS                                                                                                                                                                                                                              |
| Brazil   | 1987      | 0-35.99 | First admin level | 4349  | HAZ, WAZ | 2,5   | Saude e nutricao das criancas nordestinas; pesquisas estaduais 1987-92. UNICEF/Universidade Federal de Pelotas. Brasilia: UNICEF, 1995.                                                                                          |
| Brazil   | 1989      | 0-59.99 | First admin level | 1093  | HAZ, WAZ | 2,5   | Saude e nutricao das criancas nordestinas; pesquisas estaduais 1987-92. UNICEF/Universidade Federal de Pelotas. Brasilia: UNICEF, 1995.                                                                                          |
| Brazil   | 1989      | 0-59.99 | First admin level | 1038  | HAZ, WAZ | 2,5   | Saude e nutricao das criancas nordestinas; pesquisas estaduais 1987-92. UNICEF/Universidade Federal de Pelotas. Brasilia: UNICEF, 1995.                                                                                          |
| Brazil   | 1989      | 0-59.99 | National          | 7487  | HAZ, WAZ | 1     | PNSN 1989                                                                                                                                                                                                                        |
| Brazil   | 1990      | 0-35.99 | First admin level | 2770  | HAZ, WAZ | 2,5   | Saude e nutricao das criancas nordestinas; pesquisas estaduais 1987-92. UNICEF/Universidade Federal de Pelotas. Brasilia: UNICEF, 1995.                                                                                          |
| Brazil   | 1991      | 0-59.99 | First admin level | 1262  | HAZ, WAZ | 2,5   | Saude e nutricao das criancas nordestinas; pesquisas estaduais 1987-92. UNICEF/Universidade Federal de Pelotas. Brasilia: UNICEF, 1995.                                                                                          |
| Brazil   | 1991      | 0-59.99 | First admin level | 1244  | HAZ, WAZ | 2,5   | Saude e nutricao das criancas nordestinas; pesquisas estaduais 1987-92. UNICEF/Universidade Federal de Pelotas. Brasilia: UNICEF, 1995.                                                                                          |
| Brazil   | 1991      | 0-59.99 | First admin level | 916   | HAZ, WAZ | 2,5   | Saude e nutricao das criancas nordestinas; pesquisas estaduais 1987-92. UNICEF/Universidade Federal de Pelotas. Brasilia: UNICEF, 1995.                                                                                          |

|              |           |          |                   |       |          |     |                                                                                                                                                                                                                                                                                                                                                                                                                                                                                |
|--------------|-----------|----------|-------------------|-------|----------|-----|--------------------------------------------------------------------------------------------------------------------------------------------------------------------------------------------------------------------------------------------------------------------------------------------------------------------------------------------------------------------------------------------------------------------------------------------------------------------------------|
| Brazil       | 1991      | 0-59.99  | First admin level | 1026  | HAZ, WAZ | 2,5 | Saude e nutricao das crianacas nordestinas; pesquisas estaduais 1987-92. UNICEF/Universidade Federal de Pelotas. Brasilia: UNICEF, 1995.                                                                                                                                                                                                                                                                                                                                       |
| Brazil       | 1996      | 0-59.99  | National          | 4045  | HAZ, WAZ | 1   | DHS<br>Laboratório de Avaliação Nutricional de Populações, Universidade de Sao Paulo (LANPOP-USP). Pesquisa de orçamentos familiares (POF - 2002-03). Rio de Janeiro, Brazil, 2007<br>( <a href="http://www.ibge.gov.br/home/estatistica/populacao/condicaoedevida/pof/2003medidas/default.shtm">http://www.ibge.gov.br/home/estatistica/populacao/condicaoedevida/pof/2003medidas/default.shtm</a> ).                                                                         |
| Brazil       | 2002-2003 | 0-59.99  | National          | 17107 | WAZ      | 2   |                                                                                                                                                                                                                                                                                                                                                                                                                                                                                |
| Brazil       | 2006-2007 | 0-59.99  | National          | 4415  | HAZ, WAZ | 2   | Centro Brasileiro de Análise e Planejamento [CEBRAP]. Pesquisa nacional de demografia e saúde da criança e da mulher - PNDS 2006. Relatório da pesquisa. Sao Paulo: CEBRAP, 2008 ( <a href="http://bvsms.saude.gov.br/bvs/pnds/index.php">http://bvsms.saude.gov.br/bvs/pnds/index.php</a> and additional analysis).<br>Quedraogo NA. Analyse de la situation nutritionnelle des populations du Burkina Faso. Conference Internationale sur la Nutrition. Rome: FAO/WHO, 1992. |
| Burkina Faso | 1987-1992 | 12-47.99 | Regional          | 606   | WAZ      | 3,5 |                                                                                                                                                                                                                                                                                                                                                                                                                                                                                |
| Burkina Faso | 1993      | 0-59.99  | National          | 4358  | HAZ, WAZ | 1   | DHS                                                                                                                                                                                                                                                                                                                                                                                                                                                                            |
| Burkina Faso | 1998-1999 | 0-59.99  | National          | 4515  | HAZ, WAZ | 1   | DHS                                                                                                                                                                                                                                                                                                                                                                                                                                                                            |
| Burkina Faso | 2003      | 0-59.99  | National          | 8007  | HAZ, WAZ | 1   | DHS                                                                                                                                                                                                                                                                                                                                                                                                                                                                            |
| Burkina Faso | 2006      | 0-59.99  | National          | 4680  | HAZ, WAZ | 1   | MICS                                                                                                                                                                                                                                                                                                                                                                                                                                                                           |
| Burkina Faso | 2009      | 0-59.99  | National          | 15318 | HAZ, WAZ | 3   | Ministry of Health. Enquête nutritionnelle nationale 2009. Ouagadougou, Burkina Faso: Direction de la Nutrition, 2009 (and additional analysis).<br>Institut National de la Statistique et de la Demographie, Measure DHS. Burkina Faso Enquete Demographique et de la Sante et a Indicateurs Multiples 2010: Rapport preliminaire. Ouagadougou, Burkina Faso and Calverton, Maryland, USA: Institut National de la Statistique et de la Demographie, and ICF Macro, 2011.     |
| Burkina Faso | 2011      | 0-59.99  | National          | 6994  | HAZ, WAZ | 2   |                                                                                                                                                                                                                                                                                                                                                                                                                                                                                |
| Burundi      | 1987      | 3-35.99  | National          | 1896  | HAZ, WAZ | 1   | DHS                                                                                                                                                                                                                                                                                                                                                                                                                                                                            |
| Burundi      | 2000      | 6-59.99  | National          | 2586  | HAZ, WAZ | 1   | MICS                                                                                                                                                                                                                                                                                                                                                                                                                                                                           |
| Burundi      | 2005      | 0-59.99  | National          | 7065  | HAZ, WAZ | 3,5 | Rapport de l'enquête nationale de nutrition de la population, 2005. Bujumbura, Burundi, October 2006 (and additional analysis).<br>Institut de Statistiques et d'Etudes Economiques du Burundi, Institut National de Sante Publique, Measure DHS. Burundi Enquete Demographique et de la Sante 2010: Rapport preliminaire. Calverton, Maryland, USA: Institut de Statistiques et d'Etudes Economiques du Burundi, Institut National de Sante Publique, and ICF Macro, 2011.    |
| Burundi      | 2010      | 0-59.99  | National          | 3590  | HAZ, WAZ | 3   |                                                                                                                                                                                                                                                                                                                                                                                                                                                                                |
| Cambodia     | 1996      | 0-59.99  | National          | 5773  | HAZ, WAZ | 2   | Ministry of Planning. Socio economic survey of Cambodia 1996: Volume 1, summary results. National Institute of Statistics. Phnom Penh, Cambodia, 1997 (and additional analysis).                                                                                                                                                                                                                                                                                               |

|                          |           |         |                   |       |          |     |                                                                                                                                                                                                                                                                                                                                                                                    |
|--------------------------|-----------|---------|-------------------|-------|----------|-----|------------------------------------------------------------------------------------------------------------------------------------------------------------------------------------------------------------------------------------------------------------------------------------------------------------------------------------------------------------------------------------|
|                          |           |         |                   |       |          |     | Helen Keller International, Cambodia. Initial findings from the 2000 Cambodia national micronutrient survey: supporting doc. to the micronutrient workshop on February 20, 2001, Phnom Penh, Kingdom of Cambodia. Helen Keller Worldwide, Phnom Penh, Cambodia, 2001 (and additional analysis).                                                                                    |
| Cambodia                 | 2000      | 0-59.99 | National (rural)  | 19556 | HAZ, WAZ | 2,5 |                                                                                                                                                                                                                                                                                                                                                                                    |
| Cambodia                 | 2000      | 0-59.99 | National          | 3467  | HAZ, WAZ | 1   | DHS                                                                                                                                                                                                                                                                                                                                                                                |
| Cambodia                 | 2005-2006 | 0-59.99 | National          | 3566  | HAZ, WAZ | 1   | DHS                                                                                                                                                                                                                                                                                                                                                                                |
|                          |           |         |                   |       |          |     | National Institute of Statistics, Ministry of Planning and UNICEF Cambodia. Cambodia anthropometrics survey 2008. Phnom Penh, Cambodia: National Institute of Statistics, Ministry of Planning and UNICEF Cambodia, 2009 (and additional analysis).                                                                                                                                |
| Cambodia                 | 2008      | 0-59.99 | National          | 7018  | HAZ, WAZ | 2   |                                                                                                                                                                                                                                                                                                                                                                                    |
| Cambodia                 | 2010      | 0-59.99 | National          | 3675  | HAZ, WAZ | 1   | DHS                                                                                                                                                                                                                                                                                                                                                                                |
|                          |           |         |                   |       |          |     | Mendoza Aldana J, Piechulek H. Situation nutritionnelle des enfants de 0 à 59 mois en zone urbaine et rurale du Cameroun. Bulletin of the World Health Organization 1992;70:725-732.                                                                                                                                                                                               |
| Cameroon                 | 1990      | 0-59.99 | First admin level | 2010  | HAZ, WAZ | 2   |                                                                                                                                                                                                                                                                                                                                                                                    |
| Cameroon                 | 1991      | 0-59.99 | National          | 2615  | HAZ, WAZ | 1   | DHS                                                                                                                                                                                                                                                                                                                                                                                |
| Cameroon                 | 1998      | 0-35.99 | National          | 1789  | HAZ, WAZ | 1   | DHS                                                                                                                                                                                                                                                                                                                                                                                |
| Cameroon                 | 2004      | 0-59.99 | National          | 3189  | HAZ, WAZ | 1   | DHS                                                                                                                                                                                                                                                                                                                                                                                |
|                          |           |         |                   |       |          |     | Institut National de la Statistique et UNICEF. Cameroun: Suivi de la situation des enfants et des femmes. Enquête par grappe à indicateurs multiples 2006. Rapport principal. Yaoundé, Cameroun: Institut National de la Statistique et UNICEF, 2008 (and additional analysis).                                                                                                    |
| Cameroon                 | 2006      | 0-59.99 | National          | 6117  | HAZ, WAZ | 2   |                                                                                                                                                                                                                                                                                                                                                                                    |
|                          |           |         |                   |       |          |     | Institut National de la Statistique, Ministère de l'Economie, Ministère de la Santé Publique, Measure DHS. Cameroun Enquete Demographique et de la Santé et a Indicateurs Multiples 2011: Rapport préliminaire. Yaounde, Cameroun and Calverton, Maryland, USA: Institut National de la Statistique, Ministère de l'Economie, Ministère de la Santé Publique, and ICF Macro, 2011. |
| Cameroon                 | 2011      | 0-59.99 | National          | 5860  | HAZ, WAZ | 3   |                                                                                                                                                                                                                                                                                                                                                                                    |
|                          |           |         |                   |       |          |     | Ferreira Medina JB, Skard T, Sobhy S, America Ungaretti M. A saude das crianças menores de cinco anos em Cabo Verde. Ministério de Saude e Promoção Social e UNICEF. Cabo Verde, 1996 (and additional analysis).                                                                                                                                                                   |
| Cape Verde               | 1994      | 0-59.99 | National          | 1610  | HAZ, WAZ | 3,5 |                                                                                                                                                                                                                                                                                                                                                                                    |
| Central African Republic | 1994-1995 | 0-35.99 | National          | 2327  | HAZ, WAZ | 1   | DHS                                                                                                                                                                                                                                                                                                                                                                                |
|                          |           |         |                   |       |          |     | Ministère de la Santé Publique et de la Population. Etat nutritionnel de la population. Rapport préliminaire de l'enquête de nutrition mai-juillet 1995. Bangui, République Centrafricaine, 1995 (and additional analysis).                                                                                                                                                        |
| Central African Republic | 1995      | 0-59.99 | National          | 2225  | HAZ, WAZ | 3,5 |                                                                                                                                                                                                                                                                                                                                                                                    |
| Central African Republic | 2000      | 0-59.99 | National          | 12683 | HAZ, WAZ | 1   | MICS                                                                                                                                                                                                                                                                                                                                                                               |
| Central African Republic | 2006      | 0-59.99 | National          | 8562  | HAZ, WAZ | 1   | MICS                                                                                                                                                                                                                                                                                                                                                                               |
| Chad                     | 1997      | 0-59.99 | National          | 5607  | HAZ, WAZ | 1   | DHS                                                                                                                                                                                                                                                                                                                                                                                |
| Chad                     | 2000      | 0-59.99 | National          | 5184  | HAZ, WAZ | 1   | MICS                                                                                                                                                                                                                                                                                                                                                                               |
| Chad                     | 2004      | 0-59.99 | National          | 4329  | HAZ, WAZ | 1   | DHS                                                                                                                                                                                                                                                                                                                                                                                |

|       |      |         |                   |         |          |       |                                                                                                                                                                                                                                               |
|-------|------|---------|-------------------|---------|----------|-------|-----------------------------------------------------------------------------------------------------------------------------------------------------------------------------------------------------------------------------------------------|
| Chile | 2001 | 0-59.99 | National          | 1002454 | HAZ, WAZ | 3,4,5 | Ministerio de Salud, Departamento de Estadísticas e Informacion. National health service system. Santiago, Chile, 2002 (and additional analysis).                                                                                             |
| Chile | 2002 | 0-59.99 | National          | 1022552 | HAZ, WAZ | 3,4,5 | Ministerio de Salud, Departamento de Estadísticas e Informacion. National health service system. Santiago, Chile, 2003 (and additional analysis).                                                                                             |
| Chile | 2007 | 0-47.99 | National          | 604485  | HAZ, WAZ | 3,4   | Atalah E. Ministerio de Salud. National Health Service System. Santiago, Chile, December 2007 (www.minsal.cl).                                                                                                                                |
| Chile | 2008 | 0-47.99 | National          | 665636  | HAZ, WAZ | 3,4   | Atalah E. Ministerio de Salud. National Health Service System. Santiago, Chile, December 2008 (www.minsal.cl).                                                                                                                                |
| China | 1987 | 0-59.99 | Regional          | 76130   | HAZ, WAZ | 3,5   | Institute of Nutrition and Food Hygiene. The third national growth and development survey of children in China, 1987 (and additional analysis).                                                                                               |
| China | 1989 | 0-59.99 | Regional          | 5744    | HAZ, WAZ | 1     | CHNS 1989                                                                                                                                                                                                                                     |
| China | 1990 | 0-59.99 | Regional          | 4332    | HAZ, WAZ | 2     | Chen Chunming, He Wu, Wang Yuying. Nutritional status of children aged 0-5 years old in China (1990) - National surveillance system in 7 provinces. Beijing, China: Chinese Center for Disease Control and Prevention, 2010.                  |
| China | 1991 | 2-59.99 | Regional          | 964     | HAZ, WAZ | 1     | CHNS 1991                                                                                                                                                                                                                                     |
| China | 1992 | 0-59.99 | National          | 5535    | HAZ, WAZ | 2     | Ge Keyou. The dietary and nutritional status of Chinese population (1992 national nutrition survey). Beijing: Institute of Nutrition and Food Hygiene, 1995 (and additional analysis).                                                        |
| China | 1992 | 0-59.99 | National (rural)  | 140994  | HAZ, WAZ | 2,5   | Nutritional status of children - 1992 Child Survey. State Statistic Bureau. Presented at 7th Asian Congress of Nutrition. Beijing, China, 1995.                                                                                               |
| China | 1992 | 0-59.99 | National (urban)  | 38711   | HAZ, WAZ | 2,5   | Nutritional status of children - 1992 Child Survey. State Statistic Bureau. Presented at 7th Asian Congress of Nutrition. Beijing, China, 1995.                                                                                               |
| China | 1993 | 1-59.99 | Regional          | 611     | HAZ, WAZ | 1     | CHNS 1993                                                                                                                                                                                                                                     |
| China | 1995 | 0-59.99 | Regional          | 2832    | HAZ, WAZ | 2     | Chen Chunming, He Wu, Wang Yuying. Nutritional status of children aged 0-5 years old in China (1995) - National surveillance system in 7 provinces. Beijing, China: Chinese Center for Disease Control and Prevention, 2010.                  |
| China | 1997 | 0-59.99 | Regional          | 409     | HAZ, WAZ | 1     | CHNS 1997                                                                                                                                                                                                                                     |
| China | 1998 | 0-59.99 | National          | 13838   | HAZ, WAZ | 2     | Chen Chunming, He Wu, Wang Yuying. Nutritional status of children aged 0-5 years old in China (1998) - National (40 nutrition surveillance sites from 26 provinces). Beijing, China: Chinese Center for Disease Control and Prevention, 2010. |
| China | 1999 | 0-35.99 | First admin level | 1497    | WAZ      | 3,5   | Dang S, Yan H, Yamamoto S, Wang X, Zeng L. Poor nutritional status of younger Tibetan children living at high altitudes. European Journal of Clinical Nutrition 2004;58:938-46.                                                               |
| China | 2000 | 2-59.99 | Regional          | 373     | HAZ, WAZ | 1     | CHNS 2000                                                                                                                                                                                                                                     |
| China | 2000 | 0-59.99 | National          | 16460   | HAZ, WAZ | 2     | Chen Chunming, He Wu, Wang Yuying. Nutritional status of children aged 0-5 years old in China (2000) - National (40 nutrition surveillance sites from 26 provinces). Beijing, China: Chinese Center for Disease Control and Prevention, 2010. |
| China | 2002 | 0-59.99 | National          | 16564   | HAZ, WAZ | 2     | Yang X, Wang Z, He Y, Yu W, Hu Y, Zhai F. [Trends and prevalence of malnutrition among Chinese children under five years old.] Acta Nutrimenta Sinica 2005;25:185-88 (and additional analysis).                                               |
| China | 2004 | 1-59.99 | Regional          | 345     | HAZ, WAZ | 1     | CHNS 2004                                                                                                                                                                                                                                     |

|                      |           |         |                  |       |          |     |                                                                                                                                                                                                                                                                                                                              |
|----------------------|-----------|---------|------------------|-------|----------|-----|------------------------------------------------------------------------------------------------------------------------------------------------------------------------------------------------------------------------------------------------------------------------------------------------------------------------------|
| China                | 2005      | 0-59.99 | National         | 15987 | HAZ, WAZ | 2   | Chen Chunming, He Wu, Wang Yuying. Nutritional status of children aged 0-5 years old in China (2005) - National (40 nutrition surveillance sites from 26 provinces). Beijing, China: Chinese Center for Disease Control and Prevention, 2010.                                                                                |
| China                | 2006      | 0-59.99 | Regional         | 336   | HAZ, WAZ | 1   | CHNS 2006                                                                                                                                                                                                                                                                                                                    |
| China                | 2008      | 0-59.99 | National (rural) | 10726 | HAZ, WAZ | 2   | Chen Chunming, He Wu, Wang Yuying. Nutritional status of children aged 0-5 years old in China (2008) - National (26 nutrition surveillance sites from rural areas). Beijing, China: Chinese Center for Disease Control and Prevention, 2010.                                                                                 |
| China                | 2009      | 0-59.99 | National (rural) | 10635 | HAZ, WAZ | 2   | Chen Chunming et al. Nutrition and rapid economic development - 2010 research report on nutrition policy in China. Beijing, China: Chinese Center for Disease Control and Prevention, 2010.                                                                                                                                  |
| China                | 2010      | 0-59.99 | National         | 15399 | HAZ, WAZ | 2   | Nutritional status of children aged 0-5 years old in China (2010) - National (38 nutrition surveillance sites from 25 provinces). Beijing, China: Chinese Center for Disease Control and Prevention, 2012 (and additional analysis).                                                                                         |
| China, Hong Kong SAR | 1993      | 0-59.99 | National         | 9654  | HAZ, WAZ | 2,5 | Leung SSF. Growth standards for Hong Kong: a territory wide survey in 1993. Hong Kong: The Chinese University of Hong Kong, 1995.                                                                                                                                                                                            |
| Colombia             | 1986      | 3-35.99 | National         | 1321  | HAZ, WAZ | 1   | DHS                                                                                                                                                                                                                                                                                                                          |
| Colombia             | 1989      | 0-59.99 | National         | 1973  | HAZ, WAZ | 3,5 | Mora JO, de Paredes B, de Navarro L, Rodriguez E. Consistent improvement in the nutritional status of Colombian children between 1965 and 1989. Bulletin of PAHO 1992;26:1-13 (and additional analysis).                                                                                                                     |
| Colombia             | 1995      | 0-59.99 | National         | 4495  | HAZ, WAZ | 1   | DHS                                                                                                                                                                                                                                                                                                                          |
| Colombia             | 2000      | 0-59.99 | National         | 4170  | HAZ, WAZ | 1   | DHS                                                                                                                                                                                                                                                                                                                          |
| Colombia             | 2004-2004 |         |                  |       |          |     |                                                                                                                                                                                                                                                                                                                              |
| Colombia             | 2005      | 0-59.99 | National         | 12370 | HAZ, WAZ | 1   | DHS                                                                                                                                                                                                                                                                                                                          |
| Colombia             | 2009-2009 |         |                  |       |          |     |                                                                                                                                                                                                                                                                                                                              |
| Colombia             | 2010      | 0-59.99 | National         | 15907 | HAZ, WAZ | 1   | DHS                                                                                                                                                                                                                                                                                                                          |
| Comoros              | 1991-1991 |         |                  |       |          |     | Ministère de la Santé Publique et de la Population. Rapport sur l'état nutritionnel et les facteurs impliqués chez les enfants de moins de deux ans en République Fédérale Islamique des Comores 1991. Direction de la Santé Familiale. Comores, 1995 (and additional analysis).                                             |
| Comoros              | 1992      | 0-23.99 | National         | 1954  | HAZ, WAZ | 3,5 |                                                                                                                                                                                                                                                                                                                              |
| Comoros              | 1996      | 0-35.99 | National         | 949   | HAZ, WAZ | 1   | DHS                                                                                                                                                                                                                                                                                                                          |
| Comoros              | 2000      | 0-59.99 | National         | 3233  | HAZ, WAZ | 1   | MICS                                                                                                                                                                                                                                                                                                                         |
| Congo                | 1987      | 0-59.99 | National (rural) | 2429  | HAZ, WAZ | 3,5 | Cornu A, Delpeuch F, Simondon F, Tchibindat F, Faucon LD, Massamba JP et al. Enquête nationale sur l'état nutritionnel des enfants d'âge préscolaire au Congo. Collection Etudes et Theses. Paris: ORSTOM, Institut Français de Recherche Scientifique pour le Développement en Coopération, 1990 (and additional analysis). |
| Congo                | 2005      | 0-59.99 | National         | 3844  | HAZ, WAZ | 1   | DHS                                                                                                                                                                                                                                                                                                                          |
| Costa Rica           | 2008-2009 | 0-59.99 | National         | 351   | HAZ, WAZ | 3,8 | Ministerio de Salud. Encuesta nacional de nutrición 2008-2009. San Jose, Costa Rica, 2011.                                                                                                                                                                                                                                   |
| Cuba                 | 2000      | 0-59.99 | National         | 1571  | HAZ, WAZ | 3,5 | Encuesta de agrupacion de indicadores multiples: Informe final, diciembre del 2000 (MICS2). La Habana, Cuba, 2000 (and additional analysis).                                                                                                                                                                                 |
| Côte d'Ivoire        | 1986      | 0-59.99 | National         | 1947  | HAZ, WAZ | 3,5 | Sahn DE. Malnutrition in Côte d'Ivoire, prevalence and determinants. Working paper No. 4. Washington D.C.: The World Bank, 1990 (and additional analysis).                                                                                                                                                                   |

|                                  |           |         |          |       |          |       |                                                                                                                                                                                                                                                                                                                                        |
|----------------------------------|-----------|---------|----------|-------|----------|-------|----------------------------------------------------------------------------------------------------------------------------------------------------------------------------------------------------------------------------------------------------------------------------------------------------------------------------------------|
| Côte d'Ivoire                    | 1994      | 0-35.99 | National | 3398  | HAZ, WAZ | 1     | DHS                                                                                                                                                                                                                                                                                                                                    |
| Côte d'Ivoire                    | 1998-1999 | 0-59.99 | National | 1529  | HAZ, WAZ | 1     | DHS                                                                                                                                                                                                                                                                                                                                    |
| Côte d'Ivoire                    | 2006      | 0-59.99 | National | 8241  | HAZ, WAZ | 1     | MICS                                                                                                                                                                                                                                                                                                                                   |
| Côte d'Ivoire                    | 2007      | 6-59.99 | National | 854   | HAZ, WAZ | 2     | Tschannen AB, Rohner F, Gohou V, Bosso E, Malan A. Evaluation des carences en vitamine A et fer en Côte d'Ivoire (Rapport final). Ministère de la Santé et de l'Hygiène Publique et Helen Keller Int., Abidjan, Côte d'Ivoire, 2009 (and additional analysis).                                                                         |
| Dem. People's Republic of Korea  | 1997      | 0-59.99 | Regional | 2275  | HAZ      | 2,4,5 | Katona Apte J, Mokdad A. Malnutrition of children in the Democratic People's Republic of North Korea. Journal of Nutrition 1998;128:1315-1319.                                                                                                                                                                                         |
| Dem. People's Republic of Korea  | 1998      | 6-59.99 | Regional | 1263  | HAZ, WAZ | 3,5   | Nutrition survey of the Democratic People's Republic of Korea. Report by the EU, UNICEF and WFP of a study undertaken in collaboration with the Government to DPRK (Internet, 7 January 1999 at <a href="http://www.wfp.org/OP/Countries/dprk/nutrition_survey.html">http://www.wfp.org/OP/Countries/dprk/nutrition_survey.html</a> ). |
| Dem. People's Republic of Korea  | 2000      | 0-59.99 | National | 4175  | HAZ, WAZ | 3,5   | Central Bureau of Statistics [DPRK]. Report of the second multiple indicator cluster survey 2000, DPRK (MICS). Pyongyang, Democratic People's Republic of Korea, 2000.                                                                                                                                                                 |
| Dem. People's Republic of Korea  | 2002      | 0-59.99 | National | 5297  | HAZ, WAZ | 2     | Central Bureau of Statistics (D.P.R. Korea). Nutrition assessment 2002 D.P.R. Korea. Pyongyang: Government of D.P.R. Korea, United Nations Children's Fund and World Food Programme, 2003 (and additional analysis).                                                                                                                   |
| Dem. People's Republic of Korea  | 2009      | 0-59.99 | National | 2172  | HAZ, WAZ | 2     | Central Bureau of Statistics (CBS), Institute of Children's Nutrition, UNICEF. The Democratic People's Republic of Korea (DPR Korea) multiple indicator cluster survey 2009 (MICS4). Final Report. Pyongyang, DPR Korea: CBS and UNICEF, 2010.                                                                                         |
| Democratic Republic of the Congo | 1995      | 0-59.99 | National | 4362  | HAZ, WAZ | 3,5   | Ministère du Plan et Reconstruction Nationale. Enquête nationale sur la situation des enfants et des femmes au Zaïre en 1995. Kinshasa, Zaïre, 1996 (and additional analysis).                                                                                                                                                         |
| Democratic Republic of the Congo | 2001      | 0-59.99 | National | 9279  | HAZ, WAZ | 1     | MICS                                                                                                                                                                                                                                                                                                                                   |
| Democratic Republic of the Congo | 2007      | 0-59.99 | National | 3215  | HAZ, WAZ | 1     | DHS                                                                                                                                                                                                                                                                                                                                    |
| Democratic Republic of the Congo | 2010      | 0-59.99 | National | 10568 | HAZ, WAZ | 2     | Ministry of Planning National Institute of Statistics in Collaboration with the United Nations Children's Fund Institut National de la Statistique et Fonds des Nations Unies pour l'Enfance, Enquete par Grappes a Indicateurs Multiples en Republique Democratique du Congo (MICS-RDS 2010), Rapport Final, Mai 2011.                |
| Djibouti                         | 1989      | 0-59.99 | National | 3750  | HAZ, WAZ | 3,5   | Ministere de la Sante Publique et des Affaires Sociales. Enquete couverture vaccinale malnutrition. Republique de Djibouti, Djibouti: Ministère de la Santé Publique et des Affaires Sociales, 1990 (and additional analysis).                                                                                                         |

|                    |           |         |          |       |          |       |                                                                                                                                                                                                                                                                                                                     |
|--------------------|-----------|---------|----------|-------|----------|-------|---------------------------------------------------------------------------------------------------------------------------------------------------------------------------------------------------------------------------------------------------------------------------------------------------------------------|
| Djibouti           | 1996      | 0-59.99 | National | NR    | HAZ, WAZ | 3,5,7 | Enquête djiboutienne auprès des ménages indicateurs sociaux (EDAM-IS 1996). Ministère du Commerce et du Tourisme, Direction Nationale de la Statistique. Djibouti ville, République de Djibouti, 1997 (and additional analysis).                                                                                    |
| Djibouti           | 2002      | 0-59.99 | National | 2289  | HAZ, WAZ | 2     | Department of Statistics and Demographic Studies, Ministry of Health and Pan Arab Project for Family Health. Enquête djiboutienne sur la santé de la famille (EDSF/PAPFAM) 2002, PAPFAM Rapport final. Djibouti, 2004 (and additional analysis).                                                                    |
| Djibouti           | 2006      | 0-59.99 | National | 1732  | HAZ, WAZ | 1     | MICS                                                                                                                                                                                                                                                                                                                |
| Dominican Republic | 1986      | 6-35.99 | National | 1926  | HAZ, WAZ | 1     | DHS                                                                                                                                                                                                                                                                                                                 |
| Dominican Republic | 1991      | 0-59.99 | National | 3167  | HAZ, WAZ | 1     | DHS                                                                                                                                                                                                                                                                                                                 |
| Dominican Republic | 1996      | 0-59.99 | National | 3719  | HAZ, WAZ | 1     | DHS                                                                                                                                                                                                                                                                                                                 |
| Dominican Republic | 2000      | 0-59.99 | National | 1862  | HAZ, WAZ | 1     | MICS                                                                                                                                                                                                                                                                                                                |
| Dominican Republic | 2002      | 0-59.99 | National | 9245  | HAZ, WAZ | 1     | DHS                                                                                                                                                                                                                                                                                                                 |
| Dominican Republic | 2006      | 0-59.99 | National | 3782  | HAZ, WAZ | 3,5   | Oficina Nacional de Estadística (ONE). Encuesta nacional de hogares de proposito multiples (ENHOGAR 2006): Informe general. Santo Domingo, Republica Dominicana: ONE, 2008 (and additional analysis).                                                                                                               |
| Dominican Republic | 2007      | 0-59.99 | National | 9212  | HAZ, WAZ | 1     | DHS<br>Freire W, Dirren H, Mora J, Arenales P, Granda E, Breilh J, et al. [Diagnostico de la situacion alimentaria, nutricional y de salud de la poblacion ecuatoriana menor de cinco años. Quito: Ministerio de Salud Publica y Consejo Nacional de Desarrollo, 1988 (and additional analysis).                    |
| Ecuador            | 1986      | 0-59.99 | National | 7798  | HAZ, WAZ | 3,5   | Larrea C, Freire WB, Lutter C. Equidad desde el principio - situacion nutricional de los niños ecuatorianos. Encuesta de condiciones de vida, 1998. Organizacion Panamericana de la Salud y Ministerio de Salud Publica, Ecuador. Washington, D.C.: OPS, 2001 (and additional analysis).                            |
| Ecuador            | 1998      | 0-59.99 | National | 2998  | HAZ, WAZ | 3,5   | Centro de Estudios de Poblacion y Desarrollo Social (CEPAR) et al. Encuesta demografía y de salud materna e infantil, ENDEMAIN 2004: Informe final. Quito, Ecuador: CEPAR, 2005 (and additional analysis).                                                                                                          |
| Ecuador            | 2004      | 0-59.99 | National | 5134  | HAZ, WAZ | 2     |                                                                                                                                                                                                                                                                                                                     |
| Egypt              | 1989      | 3-35.99 | National | 2022  | HAZ, WAZ | 1     | DHS                                                                                                                                                                                                                                                                                                                 |
| Egypt              | 1991      | 0-59.99 | National | 3446  | HAZ, WAZ | 1     | PAPCHILD Egypt                                                                                                                                                                                                                                                                                                      |
| Egypt              | 1992-1993 | 0-59.99 | National | 7174  | HAZ, WAZ | 1     | DHS                                                                                                                                                                                                                                                                                                                 |
| Egypt              | 1995-1996 | 0-59.99 | National | 10037 | HAZ, WAZ | 1     | DHS                                                                                                                                                                                                                                                                                                                 |
| Egypt              | 1996      | 0-59.99 | National | 1629  | HAZ, WAZ | 3,5   | El Tawila S. Child well-being in Egypt: results of Egypt's multiple indicator cluster survey (MICS). Cairo: Social Research Centre, American University, 1997.<br>Egypt demographic and health survey 1997. Demographic and Health Surveys. El-Zanaty and Associates, Cairo, Egypt, 1998 (and additional analysis). |
| Egypt              | 1997-1998 | 0-59.99 | National | 3328  | HAZ, WAZ | 3,5   |                                                                                                                                                                                                                                                                                                                     |
| Egypt              | 1998      | 0-59.99 | National | 3997  | HAZ, WAZ | 3,5   | El-Zanaty et al. Egypt demographic and health survey 1998. Demographic and Health Surveys. Cairo, Egypt, 1999 (and additional analysis).                                                                                                                                                                            |

|                   |           |         |          |       |          |       |                                                                                                                                                                                                                                                                                                      |
|-------------------|-----------|---------|----------|-------|----------|-------|------------------------------------------------------------------------------------------------------------------------------------------------------------------------------------------------------------------------------------------------------------------------------------------------------|
| Egypt             | 2000      | 0-59.99 | National | 10210 | HAZ      | 1     | DHS                                                                                                                                                                                                                                                                                                  |
| Egypt             | 2003      | 0-59.99 | National | 6019  | HAZ, WAZ | 1     | DHS                                                                                                                                                                                                                                                                                                  |
| Egypt             | 2005      | 0-59.99 | National | 12199 | HAZ, WAZ | 1     | DHS                                                                                                                                                                                                                                                                                                  |
| Egypt             | 2008      | 0-59.99 | National | 9345  | HAZ, WAZ | 1     | DHS                                                                                                                                                                                                                                                                                                  |
| El Salvador       | 1988      | 0-59.99 | National | 2002  | HAZ, WAZ | 2     | Evaluacion de la situacion alimentaria nutricional en El Salvador (ESANES-88). Ministerio de Salud Publica y Asistencia Social. San Salvador, El Salvador, 1990 (and additional analysis).                                                                                                           |
| El Salvador       | 1993      | 0-59.99 | National | 3598  | HAZ, WAZ | 2     | Salvadoran Demographic Association. National family health survey 1993 (FESAL-93). San Salvador: Government of El Salvador, 1994 (and additional analysis).                                                                                                                                          |
| El Salvador       | 1994      | 0-59.99 | Regional | 545   | HAZ, WAZ | 3,5   | Ministerio de Salud. Informe final: Linea basal de la evaluacion programa nacional de educacion nutricional. San Salvador, El Salvador, 1995.                                                                                                                                                        |
| El Salvador       | 1998      | 3-59.99 | National | 6624  | HAZ, WAZ | 1     | RHS El Salvador 1998                                                                                                                                                                                                                                                                                 |
| El Salvador       | 2002-2003 | 0-59.99 | National | 5250  | HAZ, WAZ | 1     | RHS El Salvador 2002-2003                                                                                                                                                                                                                                                                            |
| El Salvador       | 2008      | 0-59.99 | National | 4611  | HAZ, WAZ | 1     | RHS El Salvador 2008                                                                                                                                                                                                                                                                                 |
| Equatorial Guinea | 1992      | 0-59.99 | Regional | 1252  | HAZ, WAZ | 3,5   | Ministère de la Santé de Guinée Equatoriale. Evaluation de l'état nutritionnel et de la mortalité infantile dans la région continentale de la Guinée Equatoriale. Document technique No 840/SG/DSP. Yaounde: Organisation de Cooperation pour la lutte contre les Endemes en Afrique Centrale, 1993. |
| Equatorial Guinea | 1997      | 0-59.99 | National | 412   | HAZ, WAZ | 2     | Custodio E, Descalzo MA, Roche J, Molina L, Sánchez I, Lwanga M et al. The economic and nutrition transition in Equatorial Guinea coincided with a double burden of over- and under nutrition. Economics and Human Biology 2010;8:80-87 (and additional analysis).                                   |
| Equatorial Guinea | 2000      | 0-59.99 | National | 2025  | HAZ, WAZ | 1     | MICS                                                                                                                                                                                                                                                                                                 |
| Equatorial Guinea | 2004      | 0-59.99 | National | 553   | HAZ, WAZ | 2     | Custodio E, Descalzo MA, Roche J, Sánchez I, Molina L, Lwanga M et al. Nutritional status and its correlates in Equatorial Guinean preschool children: Results from a nationally representative survey. Food and Nutrition Bulletin 2008;29:49-58 (and additional analysis).                         |
| Eritrea           | 1993      | 6-59.99 | National | NR    | HAZ, WAZ | 3,5,7 | Ministry of Finance and Development. Children and women in Eritrea: 1994. Government of the State of Eritrea/UNICEF Situation Analysis. Asmara, Eritrea, 1994 (and additional analysis).                                                                                                             |
| Eritrea           | 1995-1996 | 0-35.99 | National | 2372  | HAZ, WAZ | 2     | National Statistics Office [Eritrea] and Macro International Inc. Eritrea demographic and health survey 1995. Demographic and Health Surveys. Calverton, Maryland: National Statistics Office and Macro International Inc, 1997 (and additional analysis).                                           |
| Eritrea           | 2002      | 0-59.99 | National | 5707  | HAZ, WAZ | 2     | National Statistics and Evaluation Office (NSEO) [Eritrea] and ORC Macro. Eritrea demographic and health survey 2002. Demographic and Health Surveys. Calverton, Maryland, USA: National Statistics and Evaluation Office and ORC Macro, 2003 (and additional analysis).                             |
| Ethiopia          | 2000      | 0-59.99 | National | 8686  | HAZ, WAZ | 1     | DHS                                                                                                                                                                                                                                                                                                  |
| Ethiopia          | 2005      | 0-59.99 | National | 3819  | HAZ, WAZ | 1     | DHS                                                                                                                                                                                                                                                                                                  |
| Ethiopia          | 2011      | 0-59.99 | National | 9553  | HAZ, WAZ | 1     | DHS                                                                                                                                                                                                                                                                                                  |
| Fiji              | 1993      | 0-59.99 | National | 618   | HAZ, WAZ | 3,5   | 1993 National nutrition survey - main report. Suva: National Food and Nutrition Committee, 1995 (and additional analysis).                                                                                                                                                                           |



|           |           |         |                  |       |          |     |                                                                                                                                                                                                                                         |
|-----------|-----------|---------|------------------|-------|----------|-----|-----------------------------------------------------------------------------------------------------------------------------------------------------------------------------------------------------------------------------------------|
| Gabon     | 2000-2001 | 0-59.99 | National         | 3428  | HAZ, WAZ | 1   | DHS                                                                                                                                                                                                                                     |
| Gambia    | 1996      | 0-59.99 | National         | 2401  | HAZ, WAZ | 3,5 | Central Statistics Department [The Gambia], et al. Report of the progress of the mid-decade goals in the Gambia (MICS), 1996. Banjul: The Republic of The Gambia and UNICEF, 1998 (and additional analysis).                            |
| Gambia    | 2000      | 0-59.99 | National         | 2711  | HAZ, WAZ | 1   | MICS                                                                                                                                                                                                                                    |
| Gambia    | 2005-2006 | 0-59.99 | National         | 6424  | HAZ, WAZ | 2   | Gambia Bureau of Statistics (GBoS). The Gambia Multiple Indicator Cluster Survey 2005/2006 Report. Banjul, The Gambia: GBoS, 2007 (and additional analysis).                                                                            |
| Georgia   | 1999      | 0-59.99 | National         | 3434  | HAZ, WAZ | 3,5 | Georgia multiple indicator cluster survey 1999 (MICS). Tbilisi, Georgia, 2000 (and additional analysis).                                                                                                                                |
| Georgia   | 2000      | 0-59.99 | Regional         | 3938  | HAZ, WAZ | 2   | Safe the Children, USAID, NCDC, and CDC. Nutritional status of children less than five years of age in six drought-affected regions of Georgia 2000-2001: Final report. Tbilisi, Georgia: d&p studio, 2002 (and additional analysis).   |
| Georgia   | 2005      | 0-59.99 | National         | 1826  | HAZ, WAZ | 1   | MICS                                                                                                                                                                                                                                    |
| Georgia   | 2009      | 0-59.99 | National         | 3020  | HAZ, WAZ | 3   | Georgia National Center for Disease Control and Public Health (NCDC&PH), UNICEF. Report of the Georgia national nutrition survey (GNNS) 2009. Tbilisi, Georgia: NCDC&PH and UNICEF, 2010.                                               |
| Ghana     | 1987-1988 | 0-59.99 | National         | 2949  | HAZ, WAZ | 3,5 | Alderman H. Nutritional status in Ghana and its determinants. Living Standards Survey, Ghana 1987-88. Working paper No. 3. Washington, D.C.: The World Bank, 1989 (and additional analysis).                                            |
| Ghana     | 1988      | 3-35.99 | National         | 1967  | HAZ, WAZ | 1   | DHS                                                                                                                                                                                                                                     |
| Ghana     | 1993-1994 | 0-35.99 | National         | 1873  | HAZ, WAZ | 1   | DHS                                                                                                                                                                                                                                     |
| Ghana     | 1998-1999 | 0-59.99 | National         | 2741  | HAZ, WAZ | 1   | DHS                                                                                                                                                                                                                                     |
| Ghana     | 2003      | 0-59.99 | National         | 3072  | HAZ, WAZ | 1   | DHS                                                                                                                                                                                                                                     |
| Ghana     | 2006      | 0-59.99 | National         | 3324  | HAZ, WAZ | 1   | MICS                                                                                                                                                                                                                                    |
| Ghana     | 2008      | 0-59.99 | National         | 2367  | HAZ, WAZ | 1   | DHS                                                                                                                                                                                                                                     |
| Guatemala | 1987      | 3-35.99 | National         | 2218  | HAZ, WAZ | 1   | DHS                                                                                                                                                                                                                                     |
| Guatemala | 1995      | 0-59.99 | National         | 8446  | HAZ, WAZ | 1   | DHS                                                                                                                                                                                                                                     |
| Guatemala | 1998-1999 | 0-59.99 | National         | 3862  | HAZ, WAZ | 1   | DHS                                                                                                                                                                                                                                     |
| Guatemala | 2000      | 0-59.99 | National         | 5415  | HAZ, WAZ | 3,5 | Marini A and Gragnolati M. Malnutrition and poverty in Guatemala. Policy Research Working Paper 2967. The World Bank, Latin America and the Caribbean Region, Human Development Sector Unit, 2003 (and additional analysis).            |
| Guatemala | 2002      | 1-59.99 | National         | 6363  | HAZ, WAZ | 1   | RHS Guatemala 2002                                                                                                                                                                                                                      |
| Guatemala | 2008-2009 | 0-59.99 | National         | 10221 | HAZ, WAZ | 1   | RHS Guatemala 2008-2009                                                                                                                                                                                                                 |
| Guinea    | 1990      | 0-59.99 | Regional (rural) | 1115  | HAZ, WAZ | 2,5 | Mock NB, Magnani RJ, Abdoh AA, Kondé MK. Intra-household correlations in maternal-child nutritional status in rural Guinea: implications for programme-screening strategies. Bulletin of the World Health Organization 1994;72:119-127. |
| Guinea    | 1994-1995 | 3-59.99 | National         | 3542  | HAZ, WAZ | 3,5 | Enquête intégrale sur les conditions de vie des ménages avec module budget et consommation (EIBC) 1994-95. Ministère du Plan et de la Coopération, Direction Nationale de la Statistique. Conakry, République de Guinée, 1998.          |
| Guinea    | 1999      | 0-59.99 | National         | 4264  | HAZ, WAZ | 1   | DHS                                                                                                                                                                                                                                     |

|               |           |         |                   |       |          |       |                                                                                                                                                                                                                                                                                                                                                                                                                                                                                                     |
|---------------|-----------|---------|-------------------|-------|----------|-------|-----------------------------------------------------------------------------------------------------------------------------------------------------------------------------------------------------------------------------------------------------------------------------------------------------------------------------------------------------------------------------------------------------------------------------------------------------------------------------------------------------|
| Guinea        | 2000      | 6-59.99 | National          | 1457  | HAZ, WAZ | 3     | Ministère de la Santé Publique, Direction Nationale de la Santé Publique, Section Alimentation-Nutri Enquête nationale sur l'anémie ferriprive en Guinée (rapport final:Version 3.0). Institut de Nutrition et de Santé de l'Enfant, République de Guinée, 2001. DHS                                                                                                                                                                                                                                |
| Guinea        | 2005      | 0-59.99 | National          | 2615  | HAZ, WAZ | 1     |                                                                                                                                                                                                                                                                                                                                                                                                                                                                                                     |
| Guinea        | 2007-2008 | 0-59.99 | National          | 11781 | HAZ, WAZ | 2     | Ministère de l'Economie des Finances et du Plan, UNICEF, PAM and Direction Nationale de la Statistique. Enquête nationale sur l'état nutritionnel et le suivi des principaux indicateurs de survie de l'enfant. Rapport provisoire, Mai 2008 (30/12/09 <a href="http://ochaonline.un.org/CoordinationIASC/Securitealimentairenutrition/tabid/5651/language/fr-FR/Default.aspx">http://ochaonline.un.org/CoordinationIASC/Securitealimentairenutrition/tabid/5651/language/fr-FR/Default.aspx</a> ). |
| Guinea-Bissau | 2000      | 0-59.99 | National          | 5358  | HAZ, WAZ | 1     |                                                                                                                                                                                                                                                                                                                                                                                                                                                                                                     |
| Guinea-Bissau | 2006      | 0-59.99 | National          | 5291  | HAZ, WAZ | 2     | Ministère de l'Economie - Secrétariat d'Etat du Plan et à l'Intégration Régionale. Enquête par grappes à indicateurs multiples, Guinée-Bissau, 2006, Rapport final. Bissau, Guinée-Bissau : Ministère de l'Economie - Secrétariat d'Etat du Plan et à l'Intégration Régionale, 2006 (and additional analysis).                                                                                                                                                                                      |
| Guinea-Bissau | 2008      | 0-59.99 | National          | 2710  | HAZ, WAZ | 3     | Gouvernement de la Guinée Bissau et UNICEF. Enquête nutritionnel SMART. Evaluation de la situation nutritionnelle en Guinée Bissau: Rapport final, décembre 2008. (30/12/09 <a href="http://ochaonline.un.org/CoordinationIASC/Securitealimentairenutrition/tabid/5651/language/fr-FR/Default.aspx">http://ochaonline.un.org/CoordinationIASC/Securitealimentairenutrition/tabid/5651/language/fr-FR/Default.aspx</a> ).                                                                            |
| Guyana        | 1993      | 0-59.99 | National          | 581   | WAZ      | 3,5   | Guyana Bureau of Statistics. Household income and expenditure survey 1993 and Guyana living standards measurement survey. In: Guyana strategies for reducing poverty. Report No. 12861-GUA. Washington: The World Bank, 1994:50-67 (and additional analysis).                                                                                                                                                                                                                                       |
| Guyana        | 2000      | 0-59.99 | National          | 2491  | HAZ, WAZ | 1     |                                                                                                                                                                                                                                                                                                                                                                                                                                                                                                     |
| Guyana        | 2006-2007 | 0-59.99 | National          | 2285  | HAZ, WAZ | 2     | Bureau of Statistics and UNICEF. Guyana multiple indicator cluster survey 2006, final report. Georgetown, Guyana: Bureau of Statistics and UNICEF, 2008 (and additional analysis).                                                                                                                                                                                                                                                                                                                  |
| Guyana        | 2009      | 0-59.99 | National          | 1551  | HAZ, WAZ | 1     |                                                                                                                                                                                                                                                                                                                                                                                                                                                                                                     |
| Haiti         | 1990      | 3-59.99 | Regional          | 967   | HAZ, WAZ | 3,5   | Centres for Disease Control. Nutritional assessment of children in drought-affected areas - Haiti, 1990. Morbidity and Mortality Weekly Report 1991;40:222-225.                                                                                                                                                                                                                                                                                                                                     |
| Haiti         | 1990      | 3-59.99 | National          | 1843  | HAZ, WAZ | 3,5   | Ministry of Public Health and Population. Haiti's nutrition situation in 1990: A report based on anthropometric data of the 1990 nutrition surveys. Port-au-Prince, Haiti, 1993 (and additional analysis).                                                                                                                                                                                                                                                                                          |
| Haiti         | 1994-1995 | 0-59.99 | National          | 2734  | HAZ, WAZ | 1     |                                                                                                                                                                                                                                                                                                                                                                                                                                                                                                     |
| Haiti         | 1995      | 0-59.99 | First admin level | 397   | HAZ, WAZ | 2,5,8 | DHS<br>Nutritional surveillance for programme planning. Haiti 1995 nutrition surveys by department. Port-au-Prince, Haiti, 1997.                                                                                                                                                                                                                                                                                                                                                                    |
| Haiti         | 1995      | 0-59.99 | First admin level | 385   | HAZ, WAZ | 2,5,8 |                                                                                                                                                                                                                                                                                                                                                                                                                                                                                                     |
| Haiti         | 1995      | 0-59.99 | First admin level | 391   | HAZ, WAZ | 2,5,8 | Nutritional surveillance for programme planning. Haiti 1995 nutrition surveys by department. Port-au-Prince, Haiti, 1997.                                                                                                                                                                                                                                                                                                                                                                           |

|          |           |          |                           |       |          |       |                                                                                                                                                                                                                                                                                   |
|----------|-----------|----------|---------------------------|-------|----------|-------|-----------------------------------------------------------------------------------------------------------------------------------------------------------------------------------------------------------------------------------------------------------------------------------|
| Haiti    | 1995      | 0-59.99  | First admin level         | 394   | HAZ, WAZ | 2,5,8 | Nutritional surveillance for programme planning. Haiti 1995 nutrition surveys by department. Port-au-Prince, Haiti, 1997.                                                                                                                                                         |
| Haiti    | 1995      | 0-59.99  | First admin level         | 398   | HAZ, WAZ | 2,5,8 | Nutritional surveillance for programme planning. Haiti 1995 nutrition surveys by department. Port-au-Prince, Haiti, 1997.                                                                                                                                                         |
| Haiti    | 1995      | 0-59.99  | First admin level         | 392   | HAZ, WAZ | 2,5,8 | Nutritional surveillance for programme planning. Haiti 1995 nutrition surveys by department. Port-au-Prince, Haiti, 1997.                                                                                                                                                         |
| Haiti    | 1995      | 0-59.99  | First admin level         | 389   | HAZ, WAZ | 2,5,8 | Nutritional surveillance for programme planning. Haiti 1995 nutrition surveys by department. Port-au-Prince, Haiti, 1997.                                                                                                                                                         |
| Haiti    | 1995      | 0-59.99  | First admin level         | 395   | HAZ, WAZ | 2,5,8 | Nutritional surveillance for programme planning. Haiti 1995 nutrition surveys by department. Port-au-Prince, Haiti, 1997.                                                                                                                                                         |
| Haiti    | 1995      | 0-59.99  | First admin level         | 388   | HAZ, WAZ | 2,5,8 | Nutritional surveillance for programme planning. Haiti 1995 nutrition surveys by department. Port-au-Prince, Haiti, 1997.                                                                                                                                                         |
| Haiti    | 1995      | 0-59.99  | First admin level         | 396   | HAZ, WAZ | 2,5,8 | Nutritional surveillance for programme planning. Haiti 1995 nutrition surveys by department. Port-au-Prince, Haiti, 1997.                                                                                                                                                         |
| Haiti    | 2000      | 0-59.99  | National                  | 5502  | HAZ, WAZ | 1     | DHS                                                                                                                                                                                                                                                                               |
| Haiti    | 2005-2006 | 0-59.99  | National                  | 2524  | HAZ, WAZ | 1     | DHS                                                                                                                                                                                                                                                                               |
| Honduras | 1987      | 0-59.99  | National                  | 3244  | HAZ, WAZ | 3,5   | Barahona F, Soto RJ, Tronconi E, Maradiaga A, O'Connor G, Corrales G. Encuesta nacional de nutricion, Honduras, 1987. Cuadros de frecuencias por regiones de salud y nacionales. Ministerio de Salud Publica. Tegucigalpa, Republica de Honduras, 1988 (and additional analysis). |
| Honduras | 1991-1992 | 0-59.99  | National                  | 5961  | HAZ, WAZ | 3,5   | Ministerio de Salud Publica. Encuesta nacional de epidemiologia y salud familiar (ENESF), 1991/92. Tegucigalpa, Republica de Honduras, 1993 (and additional analysis).                                                                                                            |
| Honduras | 1993-1994 | 0-59.99  | National                  | 1875  | HAZ, WAZ | 3,5   | National survey of socio-economic indicators 1993/94. Tegucigalpa, Republica de Honduras, 1996 (and additional analysis).                                                                                                                                                         |
| Honduras | 1996      | 12-59.99 | National                  | 1455  | HAZ, WAZ | 2     | Ministry of Health. National micronutrient survey Honduras 1996. Tegucigalpa, Republic of Honduras, 1997 (and additional analysis).                                                                                                                                               |
| Honduras | 2001      | 1-59.99  | National                  | 5624  | HAZ, WAZ | 1     | RHS Honduras 2001                                                                                                                                                                                                                                                                 |
| Honduras | 2005-2006 | 0-59.99  | National                  | 9200  | HAZ, WAZ | 1     | DHS                                                                                                                                                                                                                                                                               |
| India    | 1988-1990 | 0-59.99  | Regional                  | 13548 | HAZ, WAZ | 3,5   | National Institute of Nutrition. National Nutrition Monitoring Bureau, 1988-90 (8 States pooled data). Hyderabad, India; 1993 (data reanalyzed for WHO).                                                                                                                          |
| India    | 1991-1992 | 0-59.99  | Regional (rural)          | 2948  | HAZ, WAZ | 3,5   | National Institute of Nutrition. National Nutrition Monitoring Bureau, 1991-92 (8 States pooled data). Hyderabad, India; 1993 (data reanalyzed for WHO).                                                                                                                          |
| India    | 1992-1993 | 0-47.99  | National                  | 26565 | HAZ, WAZ | 1     | DHS                                                                                                                                                                                                                                                                               |
| India    | 1992-1993 | 0-35.99  | First admin level (rural) | 2010  | HAZ, WAZ | 3,5   | Abel R and Sampathkumar V. Tamil Nadu nutritional survey comparing children aged 0-3 years with the NCHS/CDC reference population. Indian Journal of Pediatrics 1998;65:565-572.                                                                                                  |
| India    | 1995-1996 | 12-59.99 | Regional                  | 46457 | HAZ, WAZ | 3,5   | Government of India. India nutrition profile. Department of Women and Child Development. Ministry of Human Resource Development. New Delhi, India, 1998.                                                                                                                          |

|           |           |         |                           |       |          |     |                                                                                                                                                                                                                                                                                                                                                                                                                                                                                                                    |
|-----------|-----------|---------|---------------------------|-------|----------|-----|--------------------------------------------------------------------------------------------------------------------------------------------------------------------------------------------------------------------------------------------------------------------------------------------------------------------------------------------------------------------------------------------------------------------------------------------------------------------------------------------------------------------|
| India     | 1996-1997 | 0-59.99 | Regional (rural)          | 22959 | HAZ, WAZ | 3,5 | Vijayaraghavan K, Hanumantha Rao D. Diet and nutrition situation in rural India. Indian Journal of Medical Research 1998;108:243-253 (and additional analysis).                                                                                                                                                                                                                                                                                                                                                    |
| India     | 1998-2000 | 0-35.99 | National                  | 24605 | HAZ, WAZ | 1   | DHS                                                                                                                                                                                                                                                                                                                                                                                                                                                                                                                |
| India     | 2004-2005 | 0-59.99 | Regional (rural)          | 5837  | HAZ, WAZ | 3   | National Nutrition Monitoring Bureau. Diet & nutritional status of population and prevalence of hypertension among adults in rural areas. NNMB Technical Report No. 24. Hyderabad, India: National Institute of Nutrition, Indian Council of Medical Research, 2006.                                                                                                                                                                                                                                               |
| India     | 2005-2006 | 0-59.99 | National                  | 40951 | HAZ, WAZ | 1   | DHS                                                                                                                                                                                                                                                                                                                                                                                                                                                                                                                |
| Indonesia | 1987      | 0-59.99 | National                  | 28169 | WAZ      | 3,5 | National socioeconomic survey 1987 (SUSENAS-1987). Central Bureau of Statistics. Jakarta, Indonesia, 1992 (and additional analysis). Atmarita, Jahari AB, Latief D, Soekirman, Tilden RL. The effect of economic crisis on the nutritional status of Indonesian pre-school children. Gizi Indonesia 2000;33-41 (and additional analysis), and <a href="http://www.gizi.net">http://www.gizi.net</a> , accessed 18/12/03.                                                                                           |
| Indonesia | 1989      | 0-59.99 | National                  | 14101 | WAZ      | 2   | Atmarita, Jahari AB, Latief D, Soekirman, Tilden RL. The effect of economic crisis on the nutritional status of Indonesian pre-school children. Gizi Indonesia 2000;33-41 (and additional analysis), and <a href="http://www.gizi.net">http://www.gizi.net</a> , accessed 18/12/03.                                                                                                                                                                                                                                |
| Indonesia | 1992      | 0-59.99 | National                  | 33742 | WAZ      | 2   | Sastroamidjodjo S, Gross R, Schultink W. SEAMEO-GTZ combined nutrition surveys. Jakarta: SEAMO-TROPMED-GTZ, 1994.                                                                                                                                                                                                                                                                                                                                                                                                  |
| Indonesia | 1991-1993 | 0-59.99 | Regional (rural)          | 3338  | HAZ, WAZ | 2,5 | IFLS 1                                                                                                                                                                                                                                                                                                                                                                                                                                                                                                             |
| Indonesia | 1993      | 0-59.99 | Regional                  | 2410  | HAZ, WAZ | 1   | Indonesia multiple indicator cluster survey (MICS) 1995. Jakarta: UNICEF, 1997 (preliminary results provided by the Centers for Disease Control and Prevention; and additional analysis).                                                                                                                                                                                                                                                                                                                          |
| Indonesia | 1995      | 0-59.99 | National                  | 9227  | HAZ, WAZ | 3,5 |                                                                                                                                                                                                                                                                                                                                                                                                                                                                                                                    |
| Indonesia | 1995      | 0-59.99 | National                  | 26073 | WAZ      | 2   | National socioeconomic survey (SUSENAS) 1995. Central Bureau of Statistics. Jakarta, Indonesia, 1998 (and additional analysis).                                                                                                                                                                                                                                                                                                                                                                                    |
| Indonesia | 1997      | 0-59.99 | Regional                  | 2522  | HAZ, WAZ | 1   | IFLS 2                                                                                                                                                                                                                                                                                                                                                                                                                                                                                                             |
| Indonesia | 1998      | 0-59.99 | National                  | 25505 | WAZ      | 2   | Atmarita, Jahari AB, Latief D, Soekirman, Tilden RL. The effect of economic crisis on the nutritional status of Indonesian pre-school children. Gizi Indonesia 2000;33-41 (and additional analysis), and <a href="http://www.gizi.net">http://www.gizi.net</a> , accessed 18/12/03.                                                                                                                                                                                                                                |
| Indonesia | 1999      | 0-59.99 | First admin level (rural) | 6898  | HAZ, WAZ | 2,5 | Nutrition and health surveillance system (NNS) - Monitoring the economic crisis: Impact and Transition, 1998-2000. Jakarta: Helen Keller International/Indonesia, 2000 (and additional analysis: rural areas in Central Java). Atmarita, Jahari AB, Latief D, Soekirman, Tilden RL. The effect of economic crisis on the nutritional status of Indonesian pre-school children. Gizi Indonesia 2000;33-41 (and additional analysis), and <a href="http://www.gizi.net">http://www.gizi.net</a> , accessed 18/12/03. |
| Indonesia | 1999      | 0-59.99 | National                  | 78849 | WAZ      | 2   |                                                                                                                                                                                                                                                                                                                                                                                                                                                                                                                    |
| Indonesia | 1999      | 0-59.99 | First admin level (rural) | 5723  | HAZ, WAZ | 2,5 | Nutrition and health surveillance system (NNS) - Monitoring the economic crisis: Impact and Transition, 1998-2000. Jakarta: Helen Keller International/Indonesia, 2000 (and additional analysis: rural areas in West Sumatra).                                                                                                                                                                                                                                                                                     |

|           |           |         |                           |        |          |     |                                                                                                                                                                                                                                                                                                                                                                                                      |
|-----------|-----------|---------|---------------------------|--------|----------|-----|------------------------------------------------------------------------------------------------------------------------------------------------------------------------------------------------------------------------------------------------------------------------------------------------------------------------------------------------------------------------------------------------------|
| Indonesia | 1999-2000 | 0-59.99 | First admin level (rural) | 3502   | HAZ, WAZ | 2,5 | Nutrition and health surveillance system (NNS) - Monitoring the economic crisis: Impact and Transition, 1998-2000. Jakarta: Helen Keller International/Indonesia, 2000 (and additional analysis: rural areas of East Java).                                                                                                                                                                          |
| Indonesia | 1999-2000 | 0-59.99 | First admin level (rural) | 4705   | HAZ, WAZ | 2,5 | Nutrition and health surveillance system (NNS) - Monitoring the economic crisis: Impact and Transition, 1998-2000. Jakarta: Helen Keller International/Indonesia, 2000 (and additional analysis: rural areas in West Java).                                                                                                                                                                          |
| Indonesia | 2000      | 0-59.99 | National                  | 106147 | HAZ, WAZ | 2   | New Insight on the Health & Nutrition Situation in Indonesia through Data Sharing: Annual Report 2000-2001. Summary: Second Annual Report of the Nutrition and Health Surveillance System in Indonesia with data from the period 2000-2001, <a href="http://www.hki.org/research/nutrition_surveillance.html">http://www.hki.org/research/nutrition_surveillance.html</a> (and additional analysis). |
| Indonesia | 2000      | 0-59.99 | Regional                  | 3673   | HAZ, WAZ | 1   | IFLS 3                                                                                                                                                                                                                                                                                                                                                                                               |
| Indonesia | 2000      | 0-59.99 | National                  | 70591  | WAZ      | 2   | Atmarita, Jahari AB, Latief D, Soekirman, Tilden RL. The effect of economic crisis on the nutritional status of Indonesian pre-school children. Gizi Indonesia 2000;33-41 (and additional analysis), and <a href="http://www.gizi.net">http://www.gizi.net</a> , accessed 18/12/03.                                                                                                                  |
| Indonesia | 2001      | 0-59.99 | National                  | 11678  | WAZ      | 2   | Atmarita, Tilden R, Noor Nastry Nur, Ascobat Gani, Widjajanto RM. Indonesian nutritional status of children 1989-2005: Poverty and household food security, dietary diversity and infection: which is the most important risk? Gizi Indonesia 2005;28: (and additional analysis).                                                                                                                    |
| Indonesia | 2001      | 0-59.99 | National                  | 96417  | HAZ, WAZ | 2   | New Insight on the Health & Nutrition Situation in Indonesia through Data Sharing: Annual Report 2000-2001. Summary: Second Annual Report of the Nutrition and Health Surveillance System in Indonesia with data from the period 2000-2001, <a href="http://www.hki.org/research/nutrition_surveillance.html">http://www.hki.org/research/nutrition_surveillance.html</a> (and additional analysis). |
| Indonesia | 2002      | 0-59.99 | National                  | 74360  | WAZ      | 2   | Atmarita, Tilden R, Noor Nastry Nur, Ascobat Gani, Widjajanto RM. Indonesian nutritional status of children 1989-2005: Poverty and household food security, dietary diversity and infection: which is the most important risk? Gizi Indonesia 2005;28: (and additional analysis).                                                                                                                    |
| Indonesia | 2003      | 0-59.99 | National                  | 77110  | WAZ      | 2   | National socioeconomic survey 2003 (SUSENAS-2003). Central Bureau of Statistics. Jakarta, Indonesia, 2006 (and additional analysis). Ministry of Health. National Institute of Health Research and Development, 2005. National Household Health Survey (SKRT) 2004, Volume 2: Community Health Status in Indonesia. Jakarta, Indonesia, 2007 (and additional analysis).                              |
| Indonesia | 2004      | 0-59.99 | National                  | 3116   | HAZ, WAZ | 2   |                                                                                                                                                                                                                                                                                                                                                                                                      |
| Indonesia | 2005      | 0-59.99 | National                  | 94652  | WAZ      | 2   | National socioeconomic survey 2005 (SUSENAS-2005). Central Bureau of Statistics. Jakarta, Indonesia, 2006 (and additional analysis).                                                                                                                                                                                                                                                                 |

|                            |      |          |          |       |          |       |                                                                                                                                                                                                                                                                                                                                                                                |
|----------------------------|------|----------|----------|-------|----------|-------|--------------------------------------------------------------------------------------------------------------------------------------------------------------------------------------------------------------------------------------------------------------------------------------------------------------------------------------------------------------------------------|
| Indonesia                  | 2007 | 0-59.99  | National | 77808 | HAZ, WAZ | 2     | Ministry of Health and National Institute of Health Research and Development. Basic Health Survey, Riskesdas, 2007. Results to be presented at the ICN in Bangkok, October 2009: "Changes in malnutrition from 1989 to 2007 in Indonesia" by Ita Atmarita, Ministry of Health.                                                                                                 |
| Indonesia                  | 2007 | 0-59.99  | Regional | 4541  | HAZ, WAZ | 1     |                                                                                                                                                                                                                                                                                                                                                                                |
| Iran (Islamic Republic of) | 1995 | 0-59.99  | National | 11139 | HAZ, WAZ | 3,5   | Undersecretary for Public Affairs, Ministry of Health and Medical Education. Cluster survey for evaluation of mid decade goal indicators (MICS). Theran, Islamic Republic of Iran, April 1996 (and additional analysis).                                                                                                                                                       |
| Iran (Islamic Republic of) | 1998 | 0-59.99  | National | 2536  | HAZ, WAZ | 3,5   | The nutritional status of children, October-November 1998 (ANIS). Teheran: Ministry of Health and Medical Education and UNICEF, 2000 (and additional analysis).                                                                                                                                                                                                                |
| Iran (Islamic Republic of) | 2001 | 13-28.99 | National | 8432  | HAZ, WAZ | 1     | Iran Micronutrient Survey 2001                                                                                                                                                                                                                                                                                                                                                 |
| Iraq                       | 1991 | 0-59.99  | Regional | 680   | HAZ, WAZ | 3,5   | Field JO, Russell RM. Nutrition mission to Iraq for UNICEF. Nutrition Reviews 1992;50:41-46. International Study Team. Infant and child mortality and nutritional status of Iraqi children after the Gulf conflict: Results of a community-based study. Center for Population and Development Studies, Harvard University, Cambridge, MA, USA; 1992 (and additional analysis). |
| Iraq                       | 1991 | 0-59.99  | National | 2565  | HAZ, WAZ | 3,5   |                                                                                                                                                                                                                                                                                                                                                                                |
| Iraq                       | 1996 | 0-59.99  | Regional | 6392  | HAZ, WAZ | 3,5   | The 1996 multiple indicator cluster survey: a survey to assess the situation of children and women in Iraq (MICS). Central Statistical Organizations and UNICEF. Baghdad, Iraq 1997.                                                                                                                                                                                           |
| Iraq                       | 1997 | 0-11.99  | Regional | 3102  | HAZ, WAZ | 3,4,5 | Ministry of Health and UNICEF/Iraq. Nutritional status survey of infants in Iraq (excluding the Autonomous Northern Governorates) - final report. Baghdad, Iraq, 1997.                                                                                                                                                                                                         |
| Iraq                       | 1997 | 0-59.99  | Regional | 2248  | HAZ, WAZ | 3,5   | Ministry of Health and Social Welfare and UNICEF/Iraq. Nutritional status of children under five in the Autonomous Northern Region, Iraq. Baghdad, Iraq, 1998 (pre-final draft).                                                                                                                                                                                               |
| Iraq                       | 1998 | 0-11.99  | Regional | 3622  | HAZ, WAZ | 3,4,5 | Nutritional status survey of infants in Iraq (15 governorates in the South/Centre). Baghdad, Iraq, 1998.                                                                                                                                                                                                                                                                       |
| Iraq                       | 1998 | 0-59.99  | Regional | 13892 | HAZ, WAZ | 3,4,5 | Nutritional status survey of infants in Iraq (15 governorates in the South/Centre). Baghdad, Iraq, 1998.                                                                                                                                                                                                                                                                       |
| Iraq                       | 1999 | 0-59.99  | Regional | 13738 | HAZ, WAZ | 3,4,5 | Ministry of Health and UNICEF/Iraq. Nutrition survey in primary health centres on polio national immunization days in centre/south Iraq (final draft). Baghdad, Iraq, 1999.                                                                                                                                                                                                    |
| Iraq                       | 1999 | 0-23.99  | Regional | 6414  | HAZ, WAZ | 3,4,5 | Ministry of Health and UNICEF. Nutrition survey of children under two attending routine immunization sessions at primary health care centres in Iraq. Baghdad, Iraq, 1999.                                                                                                                                                                                                     |
| Iraq                       | 2000 | 0-59.99  | National | 13861 | HAZ, WAZ | 1     | MICS                                                                                                                                                                                                                                                                                                                                                                           |

|         |      |         |          |       |          |       |                                                                                                                                                                                                                                                                                                                                          |
|---------|------|---------|----------|-------|----------|-------|------------------------------------------------------------------------------------------------------------------------------------------------------------------------------------------------------------------------------------------------------------------------------------------------------------------------------------------|
| Iraq    | 2002 | 0-59.99 | Regional | 24489 | HAZ, WAZ | 3,5   | Ministry of Health, Directorate of Preventive Health, Nutrition Research Institute, Ministry of Planning, Central Statistical Organisation and UNICEF. Integrated nutritional status survey of under five years and breastfeeding/ complementary feeding practices of under two years in South/Center Iraq. Baghdad, Iraq: UNICEF, 2002. |
| Iraq    | 2003 | 0-59.99 | National | NR    | HAZ, WAZ | 3,5,7 | Baseline food security analysis in Iraq. Baghdad, Iraq: WFP Iraq Country Office, September 2004 (and additional analysis).                                                                                                                                                                                                               |
| Iraq    | 2004 | 0-59.99 | National | 16464 | HAZ, WAZ | 3,5   | Iraq living conditions survey 2004. Volume 1: Tabulation report. Baghdad, Iraq: Central Organization for Statistics and Information Technology, Ministry of Planning and Development Cooperation, 2005 (and additional analysis).                                                                                                        |
| Iraq    | 2006 | 0-59.99 | National | 16309 | HAZ, WAZ | 2     | Central Organization for Statistics & Information Technology and Kurdistan Regional Statistical Office. Iraq multiple indicator cluster survey 2006, Final report. Iraq, 2007 (and additional analysis).                                                                                                                                 |
| Jamaica | 1989 | 0-59.99 | National | 860   | HAZ, WAZ | 3,5   | Jamaica Living Standards and Measurement Survey 1989. Kingston: The World Bank, 1990 (and additional analysis).                                                                                                                                                                                                                          |
| Jamaica | 1991 | 0-59.99 | National | 358   | HAZ, WAZ | 3,5,8 | Jamaica survey of living conditions - report 1991. Kingston: The Planning Institute and the Statistical Institute of Jamaica, 1992 (and additional analysis).                                                                                                                                                                            |
| Jamaica | 1992 | 0-59.99 | National | 1327  | HAZ, WAZ | 3,5   | Jamaica survey of living conditions 1992. Kingston: The Planning Institute and the Statistical Institute of Jamaica, 1994 (and additional analysis).                                                                                                                                                                                     |
| Jamaica | 1993 | 0-59.99 | National | 663   | HAZ, WAZ | 3,5   | Jamaica survey of living conditions 1993. Kingston: The Planning Institute and the Statistical Institute of Jamaica, 1995 (and additional analysis).                                                                                                                                                                                     |
| Jamaica | 1994 | 0-59.99 | National | 982   | HAZ, WAZ | 2     | Jamaica survey of living conditions, 1994. Kingston: The Planning Institute and the Statistical Institute of Jamaica, 1996 (and additional analysis).                                                                                                                                                                                    |
| Jamaica | 1995 | 0-59.99 | National | 959   | HAZ, WAZ | 2     | Jamaica survey of living conditions, 1995. Kingston: The Planning Institute and the Statistical Institute of Jamaica, 1997 (and additional analysis).                                                                                                                                                                                    |
| Jamaica | 1996 | 0-59.99 | National | 1001  | HAZ, WAZ | 2     | Jamaica survey of living conditions, 1996. Kingston: The Planning Institute and the Statistical Institute of Jamaica, 1997 (and additional analysis).                                                                                                                                                                                    |
| Jamaica | 1997 | 0-59.99 | National | 931   | HAZ, WAZ | 2     | Jamaica survey of living conditions, 1997. Kingston: The Planning Institute and the Statistical Institute of Jamaica, 1998 (and additional analysis).                                                                                                                                                                                    |
| Jamaica | 1998 | 0-59.99 | National | 3142  | HAZ, WAZ | 2     | Jamaica survey of living conditions, 1998. Kingston: The Planning Institute and the Statistical Institute of Jamaica, 1999 (and additional analysis).                                                                                                                                                                                    |
| Jamaica | 1999 | 0-59.99 | National | 810   | HAZ, WAZ | 2     | Jamaica survey of living conditions, 1999. Kingston: The Planning Institute and the Statistical Institute of Jamaica, 2000 (and additional analysis).                                                                                                                                                                                    |
| Jamaica | 2000 | 0-59.99 | National | 770   | HAZ, WAZ | 2     | Jamaica survey of living conditions data set 2000. The Planning Institute and the Statistical Institute of Jamaica, 2001 (and additional analysis).                                                                                                                                                                                      |
| Jamaica | 2001 | 0-59.99 | National | 631   | HAZ, WAZ | 2     | Jamaica survey of living conditions data set 2001. The Planning Institute and the Statistical Institute of Jamaica, 2002 (and additional analysis).                                                                                                                                                                                      |

|            |           |         |                  |       |          |       |                                                                                                                                                                                                                                                   |
|------------|-----------|---------|------------------|-------|----------|-------|---------------------------------------------------------------------------------------------------------------------------------------------------------------------------------------------------------------------------------------------------|
| Jamaica    | 2002      | 0-59.99 | National         | 3275  | HAZ, WAZ | 2     | Jamaica survey of living conditions data set 2002. The Planning Institute and the Statistical Institute of Jamaica, 2003 (and additional analysis).                                                                                               |
| Jamaica    | 2004      | 0-59.99 | National         | 793   | HAZ, WAZ | 2     | Jamaica survey of living conditions data set 2004. The Planning Institute and the Statistical Institute of Jamaica, 2005 (and additional analysis).                                                                                               |
| Jamaica    | 2006      | 0-59.99 | National         | 454   | HAZ, WAZ | 3,5   | Jamaica survey of living conditions data set 2006. The Planning Institute and the Statistical Institute of Jamaica, 2009 (and additional analysis).                                                                                               |
| Jamaica    | 2007      | 0-59.99 | National         | 500   | HAZ, WAZ | 3,5   | Jamaica survey of living conditions data set 2007. The Planning Institute and the Statistical Institute of Jamaica, 2009 (and additional analysis).                                                                                               |
| Jordan     | 1990      | 0-59.99 | National         | 6596  | HAZ, WAZ | 1     | DHS                                                                                                                                                                                                                                               |
| Jordan     | 1991      | 0-59.99 | National         | 8113  | HAZ, WAZ | 3,5   | Ministry of Health. Assessment of the nutritional status of preschool children in Jordan. Amman: Department of Statistics, 1993.                                                                                                                  |
| Jordan     | 1997      | 0-59.99 | National         | 5578  | HAZ, WAZ | 1     | DHS                                                                                                                                                                                                                                               |
| Jordan     | 2002      | 0-59.99 | National         | 4858  | HAZ, WAZ | 1     | DHS                                                                                                                                                                                                                                               |
| Jordan     | 2007      | 0-59.99 | National         | 4371  | HAZ, WAZ | 1     | DHS                                                                                                                                                                                                                                               |
| Jordan     | 2009      | 0-59.99 | National         | 4354  | HAZ, WAZ | 1     | DHS                                                                                                                                                                                                                                               |
| Kazakhstan | 1995      | 0-35.99 | National         | 733   | HAZ, WAZ | 1     | DHS                                                                                                                                                                                                                                               |
| Kazakhstan | 1999      | 0-59.99 | National         | 565   | HAZ, WAZ | 1     | DHS                                                                                                                                                                                                                                               |
| Kazakhstan | 2006      | 0-59.99 | National         | 4227  | HAZ, WAZ | 1     | MICS                                                                                                                                                                                                                                              |
| Kenya      | 1987      | 6-59.99 | National (rural) | 6957  | HAZ      | 2,5   | Fourth Rural Child Nutrition Survey, 1987. Central Bureau of Statistics, Ministry of Planning and National Development. Republic of Kenya, Nairobi; 1991.                                                                                         |
| Kenya      | 1993      | 0-59.99 | National         | 4880  | HAZ, WAZ | 1     | DHS                                                                                                                                                                                                                                               |
| Kenya      | 1994      | 6-59.99 | National         | 8944  | HAZ, WAZ | 3,5   | Central Bureau of Statistics. Fifth child nutrition survey, 1994. Welfare monitoring survey. Nairobi, Kenya, 1995.                                                                                                                                |
| Kenya      | 1998      | 0-35.99 | National         | 2887  | HAZ, WAZ | 1     | DHS                                                                                                                                                                                                                                               |
| Kenya      | 2000      | 0-59.99 | National         | 6091  | HAZ, WAZ | 1     | MICS                                                                                                                                                                                                                                              |
| Kenya      | 2003      | 0-59.99 | National         | 4689  | HAZ, WAZ | 1     | DHS                                                                                                                                                                                                                                               |
| Kenya      | 2005-2006 | 6-59.99 | National         | 9985  | HAZ, WAZ | 3,5   | Kenya integrated household budget survey (KIHBS), 2006/06: Revised edition, basic report. Nairobi, Kenya 2006 (and additional analysis).                                                                                                          |
| Kenya      | 2008-2009 | 0-59.99 | National         | 5058  | HAZ, WAZ | 1     | DHS                                                                                                                                                                                                                                               |
| Kiribati   | 1985      | 0-59.99 | National         | 2941  | HAZ, WAZ | 3,5   | Ministry of Health and Family Planning. National nutrition survey, 1985. Government of Kiribati. South Tarawa, Republic of Kiribati, 1990 (draft version; and additional analysis).                                                               |
| Kuwait     | 1994-1995 | 6-59.99 | National         | 1280  | HAZ, WAZ | 3,5   | Amine EK, Al-Awadi FA. Nutritional status survey of preschool children in Kuwait. Eastern Mediterranean Health Journal 1996;2:386-394.                                                                                                            |
| Kuwait     | 1996-1997 | 0-59.99 | National         | 12376 | HAZ, WAZ | 3,4,5 | Kuwait national nutritional surveillance system. Nutrition unit, Ministry of Health. Al Shaab, Kuwait, 1998 (and additional analysis).                                                                                                            |
| Kuwait     | 2001      | 0-59.99 | National         | 4878  | HAZ, WAZ | 2,4   | Administration of Food and Nutrition, Ministry of Health. Kuwait nutrition surveillance system, 2005 report: 2001-2005 trends. Kuwait, State of Kuwait: Administration of Food and Nutrition, Ministry of Health, 2006 (and additional analysis). |
| Kuwait     | 2002      | 0-59.99 | National         | 3842  | HAZ, WAZ | 2,4   | Administration of Food and Nutrition, Ministry of Health. Kuwait nutrition surveillance system, 2005 report: 2001-2005 trends. Kuwait, State of Kuwait: Administration of Food and Nutrition, Ministry of Health, 2006 (and additional analysis). |



|                                  |           |         |          |      |          |     |                                                                                                                                                                                                                                                           |
|----------------------------------|-----------|---------|----------|------|----------|-----|-----------------------------------------------------------------------------------------------------------------------------------------------------------------------------------------------------------------------------------------------------------|
| Kuwait                           | 2003      | 0-59.99 | National | 4308 | HAZ, WAZ | 2,4 | Administration of Food and Nutrition, Ministry of Health. Kuwait nutrition surveillance system, 2005 report: 2001-2005 trends. Kuwait, State of Kuwait: Administration of Food and Nutrition, Ministry of Health, 2006 (and additional analysis).         |
| Kuwait                           | 2004      | 0-59.99 | National | 4381 | HAZ, WAZ | 2,4 | Administration of Food and Nutrition, Ministry of Health. Kuwait nutrition surveillance system, 2005 report: 2001-2005 trends. Kuwait, State of Kuwait: Administration of Food and Nutrition, Ministry of Health, 2006 (and additional analysis).         |
| Kuwait                           | 2005      | 0-59.99 | National | 5601 | HAZ, WAZ | 2,4 | Administration of Food and Nutrition, Ministry of Health. Kuwait nutrition surveillance system, 2005 report: 2001-2005 trends. Kuwait, State of Kuwait: Administration of Food and Nutrition, Ministry of Health, 2006 (and additional analysis).         |
| Kuwait                           | 2006      | 0-59.99 | National | 3422 | HAZ, WAZ | 2,4 | Administration of Food and Nutrition, Ministry of Health. Kuwait nutrition surveillance system: 2006-2009 trends. Kuwait, State of Kuwait: Administration of Food and Nutrition, Ministry of Health, 2010 (and additional analysis).                      |
| Kuwait                           | 2007      | 0-59.99 | National | 3949 | HAZ, WAZ | 2,4 | Administration of Food and Nutrition, Ministry of Health. Kuwait nutrition surveillance system: 2006-2009 trends. Kuwait, State of Kuwait: Administration of Food and Nutrition, Ministry of Health, 2010 (and additional analysis).                      |
| Kuwait                           | 2008      | 0-59.99 | National | 4199 | HAZ, WAZ | 2,4 | Administration of Food and Nutrition, Ministry of Health. Kuwait nutrition surveillance system: 2006-2009 trends. Kuwait, State of Kuwait: Administration of Food and Nutrition, Ministry of Health, 2010 (and additional analysis).                      |
| Kuwait                           | 2009      | 0-59.99 | National | 4099 | HAZ, WAZ | 2,4 | Administration of Food and Nutrition, Ministry of Health. Kuwait nutrition surveillance system: 2006-2009 trends. Kuwait, State of Kuwait: Administration of Food and Nutrition, Ministry of Health, 2010 (and additional analysis).                      |
| Kyrgyzstan                       | 1997      | 0-35.99 | National | 963  | HAZ, WAZ | 1   | DHS                                                                                                                                                                                                                                                       |
| Kyrgyzstan                       | 2005-2006 | 0-59.99 | National | 2875 | HAZ, WAZ | 1   | MICS                                                                                                                                                                                                                                                      |
| Lao People's Democratic Republic | 1986      | 0-59.99 | Regional | 6967 | HAZ      | 3,5 | Vijayaraghavan K. A nutritional surveillance report for the Lao People's Democratic Republic. Assignment Report (WP)NUT/LAO/NUT/001-E. Geneva: World Health Organization, 1988.                                                                           |
| Lao People's Democratic Republic | 1993      | 0-59.99 | National | 1365 | HAZ, WAZ | 3,5 | Ministry of Public Health. Women and children in the Lao People's Democratic Republic. Results from the LAO social indicator survey (LSIS). Vientiane: Mother and Child Institute, 1994 (and additional analysis).                                        |
| Lao People's Democratic Republic | 1994      | 0-59.99 | National | 2950 | HAZ, WAZ | 3,5 | Diagnostic de la situation nutritionnel et consommationn alimentaire au Laos. Rapport complet de l'étude sur l'état nutritionnel de la population Laotienne. ESNA: TCP/LAO/2354. Rome: Food and Agriculture Organization, 1995 (and additional analysis). |
| Lao People's Democratic Republic | 2000      | 0-59.99 | National | 1444 | HAZ, WAZ | 1   | MICS                                                                                                                                                                                                                                                      |

|                                  |           |          |          |       |          |     |                                                                                                                                                                                                                                                                 |
|----------------------------------|-----------|----------|----------|-------|----------|-----|-----------------------------------------------------------------------------------------------------------------------------------------------------------------------------------------------------------------------------------------------------------------|
| Lao People's Democratic Republic | 2006      | 0-59.99  | National | 3976  | HAZ, WAZ | 1   | MICS                                                                                                                                                                                                                                                            |
| Lebanon                          | 1996      | 0-59.99  | National | 1782  | HAZ, WAZ | 1   | PAPCHILD Lebanon                                                                                                                                                                                                                                                |
| Lebanon                          | 2004      | 0-59.99  | National | 1129  | HAZ, WAZ | 2   | The Arab League and the Republic of Lebanon. Lebanon family health survey 2004: Principal report. Tutelian M, Khayyat M, Monem AA, eds. The Pan Arab Project for Family Health, 2006 (additional analysis conducted by PAPFAM).                                 |
| Lesotho                          | 1992      | 0-59.99  | National | 4687  | HAZ, WAZ | 3,5 | Ministries of Health and Agriculture. National nutrition survey report, May-June 1992. Maseru, Kingdom of Lesotho, 1992 (and additional analysis).                                                                                                              |
| Lesotho                          | 1994      | 24-59.99 | National | 449   | HAZ, WAZ | 3,5 | Ministry of Health. National survey on iodine, vitamin A and iron status of women and children in Lesotho. Maseru, Lesotho, 1994.                                                                                                                               |
| Lesotho                          | 1996      | 0-59.99  | National | 2823  | HAZ, WAZ | 3,5 | Spring CA. Mid-decade goals: progress towards the world summit, May 1996 (MICS). Maseru: Bureau of Statistics and UNICEF, 1996.                                                                                                                                 |
| Lesotho                          | 2000      | 0-59.99  | National | 3042  | HAZ, WAZ | 1   | MICS                                                                                                                                                                                                                                                            |
| Lesotho                          | 2004-2005 | 0-59.99  | National | 1353  | HAZ, WAZ | 1   | DHS                                                                                                                                                                                                                                                             |
| Lesotho                          | 2009-2010 | 0-59.99  | National | 1600  | HAZ, WAZ | 1   | DHS                                                                                                                                                                                                                                                             |
| Liberia                          | 1999-2000 | 0-59.99  | National | 4702  | HAZ, WAZ | 2   | Ministry of Health and Social Welfare, UNICEF, Christian Health Association of Liberia. Liberia national nutrition survey 1999-2000. Monrovia, Liberia, 2001 (and additional analysis).                                                                         |
| Liberia                          | 2006-2007 | 0-59.99  | National | 4311  | HAZ, WAZ | 1   | DHS                                                                                                                                                                                                                                                             |
| Libyan Arab Jamahiriya           | 1995      | 0-59.99  | National | 4440  | HAZ, WAZ | 1   | PAPCHILD Libyan Arab Jamahiriya                                                                                                                                                                                                                                 |
| Libyan Arab Jamahiriya           | 2007      | 0-59.99  | National | 10723 | HAZ, WAZ | 2   | National Center for Infectious and Chronic Disease Control [Jamahiriya] and Pan-Arab Project for Family Health. National Libyan family health survey. PAPFAM surveys. Cairo: The league of Arab States, 2008 (and additional analysis conducted by PAPFAM).     |
| Madagascar                       | 1985      | 0-59.99  | Regional | 1000  | HAZ, WAZ | 3,5 | Ministère de la Recherche Scientifique et Technologique pour le Developpement. Synthèse des données existantes sur l'état nutritionnel à Madagascar. Antananarivo, Madagascar, 1990.                                                                            |
| Madagascar                       | 1986      | 0-59.99  | Regional | 1000  | HAZ, WAZ | 3,5 | Ministère de la Recherche Scientifique et Technologique pour le Developpement. Synthèse des données existantes sur l'état nutritionnel à Madagascar. Antananarivo, Madagascar, 1990.                                                                            |
| Madagascar                       | 1992      | 0-59.99  | National | 4116  | HAZ, WAZ | 1   | DHS                                                                                                                                                                                                                                                             |
| Madagascar                       | 1993-1994 | 3-59.99  | National | 3131  | HAZ, WAZ | 3,5 | Institut National de la Statistique. Enquête permanente aupres des menages - rapport principal, décembre 1995. Antananarivo, Madagascar, 1995 (and additional analysis).                                                                                        |
| Madagascar                       | 1995      | 0-59.99  | National | 5049  | HAZ, WAZ | 3,5 | Institut National de la Statistique et UNICEF. Enquête par grappes a indicateurs multiples [multiple indicators cluster survey (MICS)], Madagascar 1995 (rapport préliminaires). Antananarivo, Madagascar: Institut National de la Statistique et UNICEF, 1996. |
| Madagascar                       | 1997      | 0-35.99  | National | 2989  | HAZ, WAZ | 1   | DHS                                                                                                                                                                                                                                                             |
| Madagascar                       | 2003-2004 | 0-59.99  | National | 4406  | HAZ, WAZ | 1   | DHS                                                                                                                                                                                                                                                             |

|            |           |         |                           |       |          |     |                                                                                                                                                                                                                                                                                     |
|------------|-----------|---------|---------------------------|-------|----------|-----|-------------------------------------------------------------------------------------------------------------------------------------------------------------------------------------------------------------------------------------------------------------------------------------|
| Madagascar | 2008-2009 | 0-59.99 | National                  | 4840  | HAZ, WAZ | 1   | DHS                                                                                                                                                                                                                                                                                 |
| Malawi     | 1992      | 0-59.99 | National                  | 3177  | HAZ, WAZ | 1   | DHS                                                                                                                                                                                                                                                                                 |
| Malawi     | 1995      | 6-59.99 | National                  | 3654  | HAZ, WAZ | 3,5 | Ministry of Economic Planning and Development. Malawi social indicators survey 1995. MICS surveys. National Statistical Office and the Centre for Social Research. Lilongwe, Malawi, 1996 (and additional analysis).                                                                |
| Malawi     | 1997-1998 | 6-59.99 | National                  | 639   | HAZ, WAZ | 3,5 | Government of Malawi. A relative profile of poverty in Malawi, 1998: A quintile-based poverty analysis of the Malawi integrated household survey, 1997-98. Poverty Monitoring System. Copied from www.nso.malawi.net; accessed 26/05/03 (and additional analysis).                  |
| Malawi     | 2000      | 0-59.99 | National                  | 9083  | HAZ, WAZ | 1   | DHS                                                                                                                                                                                                                                                                                 |
| Malawi     | 2004-2005 | 0-59.99 | National                  | 7967  | HAZ, WAZ | 1   | DHS                                                                                                                                                                                                                                                                                 |
| Malawi     | 2006      | 0-59.99 | National                  | 21207 | HAZ, WAZ | 1   | MICS                                                                                                                                                                                                                                                                                |
| Malawi     | 2009      | 6-59.99 | National                  | 981   | HAZ, WAZ | 3   | UNICEF and CDC. The national micronutrient survey 2009. Lilongwe, Malawi: Ministry of Health, UNICEF, Irish Aid and CDC, 2011.                                                                                                                                                      |
| Malawi     | 2010      | 0-59.99 | National                  | 4527  | HAZ, WAZ | 1   | DHS                                                                                                                                                                                                                                                                                 |
| Malaysia   | 1990      | 0-59.99 | First admin level (rural) | 641   | HAZ      | 3,5 | Kiyu A, Teo B, Hardin S, Ong F. Nutritional status of children in rural Sarawak, Malaysia. Southeast Asian Journal of Tropical Medicine and Public Health 1991;22:211-215.                                                                                                          |
| Malaysia   | 1999      | 0-59.99 | National                  | 5108  | HAZ, WAZ | 3,5 | Somsiah Parman. A study of malnutrition in under five children in Malaysia. Kuala Lumpur, Malaysia: Ministry of Health, 2000 (and additional analysis).                                                                                                                             |
| Malaysia   | 2006      | 0-59.99 | National                  | 5546  | HAZ, WAZ | 3   | Khor GL, Noor Safiza MN, Jamalludin AB, Jamaiah H, Geeta A, Kee CC et al. Nutritional status of children below five years in Malaysia: Anthropometric analyses from the third national health and morbidity survey III (NHMS, 2006). Malaysian Journal of Nutrition 2009;15:121-36. |
| Maldives   | 1994      | 0-59.99 | National                  | 1995  | HAZ, WAZ | 2   | Ministry of Health and Welfare. Nutritional status and child feeding practices of Maldivian children. Department of Public Health. Male, Maldives, 1994.                                                                                                                            |
| Maldives   | 1995      | 0-59.99 | National                  | 798   | HAZ, WAZ | 3,5 | Maldives multiple indicator survey report (MICS). United Nations Children's Fund. Malé, Maldives, June 1996 (and additional analysis).                                                                                                                                              |
| Maldives   | 1997-1998 | 0-59.99 | National                  | 1512  | HAZ, WAZ | 2   | Ministry of Planning and National Development and United Nations Development Programme. Vulnerability and poverty assessment 1998. Male', Republic of Maldives, 1999 (and additional analysis).                                                                                     |
| Maldives   | 2001      | 0-59.99 | National                  | 746   | HAZ, WAZ | 2   | Damodar Sahu. Multiple indicator cluster survey (MICS 2) Maldives (draft). Ministry of Health. Male, Republic of Maldives, 2001 (and additional analysis).                                                                                                                          |
| Mali       | 1987      | 3-35.99 | National                  | 1521  | HAZ, WAZ | 1   | DHS                                                                                                                                                                                                                                                                                 |
| Mali       | 1990      | 6-59.99 | Regional (rural)          | 1171  | HAZ, WAZ | 2,5 | La situation alimentaire et nutritionnelle au niveau des ménages et le role des femmes ... au Gourma et à Koutiala. Rapport d'Etape, Sécurité Alimentaire/Femmes, Centre National de la Recherche Scientifique et Technologique, Bamako, Mali, 1992.                                |

|            |           |          |                  |       |          |       |                                                                                                                                                                                                                                                      |
|------------|-----------|----------|------------------|-------|----------|-------|------------------------------------------------------------------------------------------------------------------------------------------------------------------------------------------------------------------------------------------------------|
| Mali       | 1990      | 6-59.99  | Regional (rural) | 331   | HAZ, WAZ | 2,5,8 | La situation alimentaire et nutritionnelle au niveau des ménages et le role des femmes ... au Gourma et à Koutiala. Rapport d'Etape, Sécurité Alimentaire/Femmes, Centre National de la Recherche Scientifique et Technologique, Bamako, Mali, 1992. |
| Mali       | 1990      | 6-59.99  | Regional (rural) | 842   | HAZ, WAZ | 2,5,8 | La situation alimentaire et nutritionnelle au niveau des ménages et le role des femmes ... au Gourma et à Koutiala. Rapport d'Etape, Sécurité Alimentaire/Femmes, Centre National de la Recherche Scientifique et Technologique, Bamako, Mali, 1992. |
| Mali       | 1991      | 6-59.99  | Regional (rural) | 502   | HAZ, WAZ | 2,5   | La situation alimentaire et nutritionnelle au niveau des ménages et le role des femmes ... au Gourma et à Koutiala. Rapport d'Etape, Sécurité Alimentaire/Femmes, Centre National de la Recherche Scientifique et Technologique, Bamako, Mali, 1992. |
| Mali       | 1992      | 12-59.99 | Regional (rural) | 145   | HAZ, WAZ | 2,5,8 | La situation alimentaire et nutritionnelle au niveau des ménages et le role des femmes ... au Gourma et à Koutiala. Rapport d'Etape, Sécurité Alimentaire/Femmes, Centre National de la Recherche Scientifique et Technologique, Bamako, Mali, 1992. |
| Mali       | 1995-1996 | 0-35.99  | National         | 4634  | HAZ, WAZ | 1     | DHS                                                                                                                                                                                                                                                  |
| Mali       | 1996      | 6-59.99  | National         | NR    | HAZ, WAZ | 3,5,7 | Enquête à indicateurs multiples au Mali (EIM) 1996 (MICS). Rapport d'Analyse. Direction Nationale de la Statistique et de l'Informatique (DNSI). Bamako, Mali, 1996 (and additional analysis).                                                       |
| Mali       | 2001      | 0-59.99  | National         | 9291  | HAZ, WAZ | 1     | DHS                                                                                                                                                                                                                                                  |
| Mali       | 2006      | 0-59.99  | National         | 10746 | HAZ, WAZ | 1     | DHS                                                                                                                                                                                                                                                  |
| Mauritania | 1988      | 0-59.99  | National         | 931   | HAZ      | 3,5   | Elder JA. The socio-economic determinants of nutritional status among children under five in Mauritania. Social Dimensions of Adjustment Surveys. Washington D.C.: The World Bank, 1990 (and additional analysis).                                   |
| Mauritania | 1990      | 0-59.99  | National         | 3613  | HAZ, WAZ | 1     | PAPCHILD Mauritania                                                                                                                                                                                                                                  |
| Mauritania | 1995-1996 | 0-59.99  | National         | 3733  | HAZ, WAZ | 3,5   | Ministère du Plan, Direction des Ressources Humaines. Enquête nationale sur les indicateurs des objectifs à mi-terme en Mauritanie (MICS). Nouakchott, République Islamique de Mauritanie, 1996 (and additional analysis).                           |
| Mauritania | 1996      | 0-59.99  | Regional (rural) | 1351  | HAZ, WAZ | 3,5   | Ministère de la Santé et des Affaires Sociales. Resultats de l'enquête nutritionnelle dans les moughataas de: Amourj (Hodh el Chargui), Koboni (Hodh el Gharbi), Bababe (Brakna). Nouakchott, Reublique Islamique de Mauritanie, 1996.               |
| Mauritania | 2000-2001 | 0-59.99  | National         | 4297  | HAZ, WAZ | 2     | Office National de la Statistique (ONS) [Mauritania] et ORC Macro. Enquête démographique et de santé Mauritanie 2000-2001. Demographic and Health Surveys. Calverton, Maryland, USA: ONS et ORC Macro, 2001 (and additional analysis).               |
| Mauritania | 2007      | 0-59.99  | National         | 7891  | HAZ, WAZ | 1     | MICS                                                                                                                                                                                                                                                 |
| Mauritania | 2008      | 0-59.99  | National         | 6338  | HAZ, WAZ | 2     | ANED, Office National de la Statistique (ONS) et UNICEF. Enquête rapide nationale sur la nutrition et survie de l'enfant en Mauritanie: Rapport final. Nouakchott, Mauritanie: ANED, ONS et UNICEF, 2008 (and additional analysis).                  |

|                             |           |          |                           |       |          |     |                                                                                                                                                                                                                                                                   |
|-----------------------------|-----------|----------|---------------------------|-------|----------|-----|-------------------------------------------------------------------------------------------------------------------------------------------------------------------------------------------------------------------------------------------------------------------|
| Mauritius                   | 1985      | 0-59.99  | National                  | 2430  | HAZ, WAZ | 3,5 | Ministry of Health. Mauritius national nutrition survey 1985: summary report. Evaluation and Nutrition Unit. Port Louis, Mauritius, 1988 (and additional analysis).                                                                                               |
| Mauritius                   | 1995      | 0-59.99  | National                  | 1537  | HAZ, WAZ | 3,5 | Ministry of Health. A survey on nutrition in Mauritius and Rodrigues, 1995 (final report). Port Louis, Mauritius, 1996 (and additional analysis).                                                                                                                 |
| Mexico                      | 1988      | 0-59.99  | National                  | 7422  | HAZ, WAZ | 3,5 | Sepulveda AJ, Lezana MA, Tapia Conyer R, Valdespino IL, Madrigal H, Kumate J. Estado nutricional de preescolares y las mujeres en Mexico: resultados de una encuesta probabilística nacional. Gaceta Medica de Mexico 1990;126:207-226 (and additional analysis). |
| Mexico                      | 1989      | 0-59.99  | National (rural)          | 14932 | HAZ, WAZ | 2   | Encuesta nacional de alimentacion en el medio rural, 1989 (ENAL). Instituto de la Nutricion 'Salvador Zubiran'. Comision Nacional de Alimentacion. Division de Nutricion, INNSZ. Tlalpan, Mexico, D.F, 1990 (and additional analysis).                            |
| Mexico                      | 1991      | 12-59.99 | First admin level         | 935   | WAZ      | 3,5 | Hernandez Martinez E, Roldan Fernandez SG. [Prevalence of malnutrition in preschool children in Tabasco, Mexico.] Salud Publica de Mexico 1995;37:211-218.                                                                                                        |
| Mexico                      | 1995      | 0-59.99  | First admin level (urban) | 1093  | HAZ, WAZ | 3,5 | Encuesta urbana de alimentacion y nutricion en la zona metropolitana de la ciudad de Mexico, ENURBAL 1995. Instituto Nacional de la Nutricion 'Salvador Zubiran'. Mexico, 1998.                                                                                   |
| Mexico                      | 1996      | 0-59.99  | National (rural)          | 31601 | HAZ, WAZ | 3,5 | Avila Curiel A, Shamah Levy T, Galindo Gomez C, Rodriguez Hernandez G, Barragan Heredia LM. La desnutricion infantil en el medio rural mexicano. Salud Publica de Mexico 1998;40:150-160.                                                                         |
| Mexico                      | 1999      | 0-59.99  | National                  | 7618  | HAZ, WAZ | 1   | Nutrition 1999                                                                                                                                                                                                                                                    |
| Mexico                      | 2005-2006 | 1-59.99  | National                  | 7953  | HAZ, WAZ | 1   | ENSANUT 2005-2006                                                                                                                                                                                                                                                 |
| Micronesia (Fed. States of) | 2000      | 24-59.99 | Regional                  | 485   | HAZ      | 3,5 | Vitamin A deficiency among children-- Federated States of Micronesia, 2000. Morbidity and Mortality Weekly Report 2001;50(24):509-12.                                                                                                                             |
| Mongolia                    | 1992      | 0-47.99  | National                  | 1679  | HAZ, WAZ | 3,5 | Kachondham Y. Report of a consultancy on the Mongolian Child Nutrition Survey. Institute of Nutrition. Nakornpathom, Thailand, 1992 (and additional analysis).                                                                                                    |
| Mongolia                    | 1997      | 0-59.99  | Regional                  | 439   | HAZ, WAZ | 2   | Nutrition Research Centre. Mongolia nutrition research centre survey 1997. Ulaanbaatar, Mongolia, 1999 (and additional analysis).                                                                                                                                 |
| Mongolia                    | 1999      | 0-59.99  | National                  | 4146  | HAZ, WAZ | 2   | Kachondham Y. Report on the 2nd national child and nutrition survey, Mongolia 1999.                                                                                                                                                                               |
| Mongolia                    | 2000      | 0-59.99  | National                  | 5811  | HAZ, WAZ | 1   | Institute of Nutrition and Faculty of Medicine, Ramathibodi Hospital, Mahidol University, Thailand, 2000 (and additional analysis).                                                                                                                               |
| Mongolia                    | 2004      | 6-59.99  | National                  | 1247  | HAZ, WAZ | 2   | MICS                                                                                                                                                                                                                                                              |
| Mongolia                    | 2005      | 0-59.99  | National                  | 3275  | HAZ, WAZ | 1   | Nutrition Research Center, Ministry of Health (Mongolia) and Unicef -Mongolia. Nutritional status of Mongolian children and women: 3rd National nutrition survey report. Ulaanbaatar, Mongolia, 2006.                                                             |
| Mongolia                    | 2010      | 0-59.99  | National                  | 3956  | HAZ, WAZ | 3   | MICS Multiple Indicator Cluster Survey 2010. Summary Report. Unlaanbaatar, 2011.                                                                                                                                                                                  |
| Morocco                     | 1987      | 0-59.99  | National                  | 5289  | HAZ, WAZ | 1   | DHS                                                                                                                                                                                                                                                               |
| Morocco                     | 1992      | 0-59.99  | National                  | 4512  | HAZ, WAZ | 1   | DHS                                                                                                                                                                                                                                                               |
| Morocco                     | 1997      | 0-59.99  | National                  | 3587  | HAZ, WAZ | 1   | PAPCHILD Morocco                                                                                                                                                                                                                                                  |
| Morocco                     | 2003-2004 | 0-59.99  | National                  | 5315  | HAZ, WAZ | 1   | DHS                                                                                                                                                                                                                                                               |

|            |           |         |                  |       |          |       |                                                                                                                                                                                                                           |
|------------|-----------|---------|------------------|-------|----------|-------|---------------------------------------------------------------------------------------------------------------------------------------------------------------------------------------------------------------------------|
| Mozambique | 1995      | 0-59.99 | National         | 4586  | HAZ, WAZ | 3,5   | Government of Mozambique and United Nations Children's Fund. Multiple indicator cluster survey Mozambique - 1995. MICS Surveys. Ministry of Planning and Finance. Maputo, Mozambique, 1996 (and additional analysis).     |
| Mozambique | 1997      | 0-35.99 | National         | 3357  | HAZ, WAZ | 1     | DHS                                                                                                                                                                                                                       |
| Mozambique | 2000-2001 | 0-59.99 | National         | NR    | HAZ, WAZ | 3,5,7 | Questionario de indicadores basicos de bem-estar (QUIBB): Relatorio final. Maputo, Moçambique: Instituto Nacional de Estadisticas, 2001 (and additional analysis).                                                        |
| Mozambique | 2002      | 6-59.99 | Regional         | 4832  | HAZ      | 3,5   | Mozambique Comite de Analise de Vulnerabilidade (VAC). Emergency vulnerability report: November-December 2002 (final report). Maputo, Mozambique: VAC, 2003.                                                              |
| Mozambique | 2003-2004 | 0-59.99 | National         | 7980  | HAZ, WAZ | 1     | DHS                                                                                                                                                                                                                       |
| Mozambique | 2008      | 0-59.99 | National         | 10595 | HAZ, WAZ | 1     | MICS                                                                                                                                                                                                                      |
| Myanmar    | 1990      | 0-35.99 | National         | 5899  | WAZ      | 3,5   | Ministry of Health. Nutrition Situation of Myanmar Children. Preliminary report of the national nutrition survey 1990. Rangoon, Myanmar, 1991 (and additional analysis).                                                  |
| Myanmar    | 1991      | 0-35.99 | National         | 5540  | HAZ, WAZ | 3,5   | Ministry of Health. Nutrition situation of Myanmar children. Report of the National Nutrition Survey 1991. Ragoon, Myanmar, 1994 (and additional analysis).                                                               |
| Myanmar    | 1994      | 0-35.99 | National         | 5994  | HAZ, WAZ | 3,5   | Department of Health. National nutrition survey, 1994. National Nutrition Centre. Yangon, Myanmar, 1995 (and additional analysis).                                                                                        |
| Myanmar    | 1995      | 0-59.99 | National         | 19908 | WAZ      | 3,5   | Ministry of Health. Monitoring progress toward the goals of the World Summit for Children through multiple indicator cluster survey (MICS). Yangon, Myanmar, 1995 (and additional analysis).                              |
| Myanmar    | 1997      | 0-35.99 | National         | 4894  | HAZ, WAZ | 3,5   | Ministry of Health. National nutrition survey 1997. National Nutrition Centre. Yangon, Myanmar, 2000 (and additional analysis).                                                                                           |
| Myanmar    | 2000      | 0-59.99 | National         | 8140  | HAZ, WAZ | 1     | MICS                                                                                                                                                                                                                      |
| Myanmar    | 2003      | 0-59.99 | National         | 8451  | HAZ, WAZ | 2     | Department of Health Planning, Ministry of Health and UNICEF (Myanmar). Multiple indicator cluster survey 2003 (MICS). Yangon, Myanmar, 2004 (and additional analysis).                                                   |
| Namibia    | 1992      | 0-59.99 | National         | 2534  | HAZ, WAZ | 1     | DHS                                                                                                                                                                                                                       |
| Namibia    | 2000      | 0-59.99 | National         | 2913  | HAZ, WAZ | 1     | DHS                                                                                                                                                                                                                       |
| Namibia    | 2006-2007 | 0-59.99 | National         | 3668  | HAZ, WAZ | 1     | DHS                                                                                                                                                                                                                       |
| Nepal      | 1995      | 6-35.99 | National         | 6781  | HAZ, WAZ | 3,5   | National Planning Commission. Nepal multiple indicator surveillance: cycle I, Jan to March 1995 health and nutrition - final report (MICS). Kathmandu, Nepal, 1996 (and additional analysis).                             |
| Nepal      | 1995-1996 | 6-35.99 | National (rural) | 696   | HAZ, WAZ | 2,5   | Hotchkiss DR, Mock NB, Seiber EE. The effect of the health care supply environment on children's nutritional status in rural Nepal. Journal of biosocial Science 2002;34:173-92.                                          |
| Nepal      | 1996      | 6-35.99 | National         | 5525  | HAZ, WAZ | 2,5   | National Planning Commission. Early childhood feeding nutrition and development. Nepal multiple indicator surveillance - fourth cycle (MICS). His Majesty's Government, Kathmandu, Nepal, 1997 (and additional analysis). |
| Nepal      | 1996      | 0-35.99 | National         | 3700  | HAZ, WAZ | 1     | DHS                                                                                                                                                                                                                       |

|           |           |         |                   |       |          |     |                                                                                                                                                                                                                                                                                                                                                                                                               |
|-----------|-----------|---------|-------------------|-------|----------|-----|---------------------------------------------------------------------------------------------------------------------------------------------------------------------------------------------------------------------------------------------------------------------------------------------------------------------------------------------------------------------------------------------------------------|
| Nepal     | 1997-1998 | 6-59.99 | National          | 17471 | HAZ, WAZ | 2   | Nepal micronutrient status survey 1998. Kathmandu, Nepal: Ministry of Health, Child Health Division, HMG/N, New ERA, Micronutrient Initiative, UNICEF Nepal and WHO, 2000 (and additional analysis).                                                                                                                                                                                                          |
| Nepal     | 2001      | 0-59.99 | National          | 6143  | HAZ, WAZ | 1   | DHS                                                                                                                                                                                                                                                                                                                                                                                                           |
| Nepal     | 2006      | 0-59.99 | National          | 5206  | HAZ, WAZ | 1   | DHS                                                                                                                                                                                                                                                                                                                                                                                                           |
| Nepal     | 2011      | 0-59.99 | National          | 2324  | HAZ, WAZ | 1   | DHS                                                                                                                                                                                                                                                                                                                                                                                                           |
| Nicaragua | 1988      | 0-59.99 | First admin level | 2822  | HAZ, WAZ | 3,5 | Ministerio de Salud, Centro de Investigacion y Estudios de la Salud. Enfoque de riesgo y estado nutricional de los ninos menores de 5 anos en la region III, 1988. Managua, Nicaragua; 1988.                                                                                                                                                                                                                  |
| Nicaragua | 1993      | 0-59.99 | National          | 3347  | HAZ, WAZ | 2   | Nicaragua 1993 living standards measurement survey (LSMS). Washington, D.C.: The World Bank, 1997 (and additional analysis).                                                                                                                                                                                                                                                                                  |
| Nicaragua | 1997-1998 | 0-59.99 | National          | 6793  | HAZ, WAZ | 1   | DHS                                                                                                                                                                                                                                                                                                                                                                                                           |
| Nicaragua | 1998      | 0-59.99 | National          | 2787  | HAZ, WAZ | 2   | Instituto Nacional de Estadisticas y Censos [Nicaragua] and the World Bank. Encuesta nacional de hogares sobre medicion de niveles de vida, 1998 (2nd Living Standard Measurements Survey). Managua, Nicaragua, 1999 (and additional analysis).                                                                                                                                                               |
| Nicaragua | 2001      | 0-59.99 | National          | 5839  | HAZ, WAZ | 1   | DHS                                                                                                                                                                                                                                                                                                                                                                                                           |
| Nicaragua | 2003-2005 | 6-59.99 | National          | 1494  | HAZ, WAZ | 2   | Ministra de Salud, MINSAL y CDC. Sistema integrado de vigilancia de intervenciones nutricionales (SIVIN): Informe de progreso, Nicaragua 2003-05. Managua, Nicaragua 2008 (and additional analysis).                                                                                                                                                                                                          |
| Nicaragua | 2006-2007 | 0-59.99 | National          | 6538  | HAZ, WAZ | 1   | RHS Nicaragua 2006-2007                                                                                                                                                                                                                                                                                                                                                                                       |
| Niger     | 1985      | 0-59.99 | National          | 1672  | HAZ, WAZ | 3,5 | Ministère de la Santé Publique et des Affaires Sociales. Enquête nationale sur la morbidité et la mortalité, rapport No 1. Cellule de Planification. Niamey, République de Niger, 1985 (and additional analysis). Quelin G, Pecoul B, Amadou B, Baker S. [Facteurs de risque de la malnutrition chez les enfants de 0-59 mois dans deux arrondissements au Niger.] <i>Medicine Tropicale</i> 1991;51:335-342. |
| Niger     | 1987      | 0-59.99 | Regional          | 3115  | HAZ      | 3,5 |                                                                                                                                                                                                                                                                                                                                                                                                               |
| Niger     | 1992      | 0-59.99 | National          | 4643  | HAZ, WAZ | 1   | DHS                                                                                                                                                                                                                                                                                                                                                                                                           |
| Niger     | 1998      | 0-35.99 | National          | 3870  | HAZ, WAZ | 1   | DHS                                                                                                                                                                                                                                                                                                                                                                                                           |
| Niger     | 2000      | 0-59.99 | National          | 4768  | HAZ, WAZ | 1   | MICS                                                                                                                                                                                                                                                                                                                                                                                                          |
| Niger     | 2006      | 0-59.99 | National          | 3671  | HAZ, WAZ | 1   | DHS                                                                                                                                                                                                                                                                                                                                                                                                           |
| Nigeria   | 1986      | 6-35.99 | First admin level | 1464  | HAZ, WAZ | 2,5 | Ministry of Health. Ondo State, Nigeria, demographic and health survey 1986. Demographic and Health Surveys. Medical/Preventive Health Division, Akure, Ondo State, Nigeria, 1989 (and additional analysis).                                                                                                                                                                                                  |
| Nigeria   | 1990      | 0-59.99 | National          | 5750  | HAZ, WAZ | 1   | DHS                                                                                                                                                                                                                                                                                                                                                                                                           |
| Nigeria   | 1999      | 0-59.99 | National          | 8617  | HAZ, WAZ | 3,5 | Federal Office of Statistics [Nigeria] and UNICEF. Multiple indicator cluster survey (1999) Nigeria (MICS). Lagos: Federal Office of Statistics and UNICEF, December 14, 2000. Maziya-Dixon B, Akinyele IO, Oguntona EB, Nokoe S, Sanusi RA, Harris E. Nigeria food consumption survey 2001-2003: Summary. Ibadan, Nigeria: International Institute of Tropical Agriculture, 2004.                            |
| Nigeria   | 2001      | 0-59.99 | National          | 4954  | HAZ, WAZ | 3,5 |                                                                                                                                                                                                                                                                                                                                                                                                               |
| Nigeria   | 2003      | 0-59.99 | National          | 4349  | HAZ, WAZ | 1   | DHS                                                                                                                                                                                                                                                                                                                                                                                                           |
| Nigeria   | 2007      | 0-59.99 | National          | 14423 | HAZ, WAZ | 1   | MICS                                                                                                                                                                                                                                                                                                                                                                                                          |
| Nigeria   | 2008      | 0-59.99 | National          | 18712 | HAZ, WAZ | 1   | DHS                                                                                                                                                                                                                                                                                                                                                                                                           |

|                                      |               |          |                   |       |          |     |                                                                                                                                                                                                                                                      |
|--------------------------------------|---------------|----------|-------------------|-------|----------|-----|------------------------------------------------------------------------------------------------------------------------------------------------------------------------------------------------------------------------------------------------------|
| Occupied<br>Palestinian<br>Territory | 1995          | 0-59.99  | First admin level | 1500  | HAZ, WAZ | 3,5 | Kumar B. Assessment of the nutritional status of children under 5 in the Gaza strip. Bethlehem: Terre des Hommes Palestine, 1995.                                                                                                                    |
| Occupied<br>Palestinian<br>Territory | 1996          | 0-59.99  | National          | 4451  | HAZ, WAZ | 3,5 | The health survey in the West Bank and Gaza Strip: main findings (MICS). Palestinian Central Bureau of Statistics. Ramallah, Palestine, 1996 (and additional analysis).                                                                              |
| Occupied<br>Palestinian<br>Territory | 2006-<br>2007 | 0-59.99  | National          | 9364  | HAZ, WAZ | 2   | Palestinian Central Bureau of Statistics. Palestinian family health survey, 2006: Final report. Ramallah, Palestine, 2007 (additional analysis conducted by PAPFAM).                                                                                 |
| Oman                                 | 1991          | 12-59.99 | National          | 764   | HAZ, WAZ | 3,5 | Musaiger OA. Ministry of Health. National Nutrition Survey of the Sultanate of Oman. UNICEF Muscat, Oman, 1993 (and additional analysis).                                                                                                            |
| Oman                                 | 1994-<br>1995 | 0-47.99  | National          | 639   | HAZ, WAZ | 2   | Ministry of Health. National study on the prevalence of vitamin A deficiency (VAD) among children 6 months to 7 years. Muscat, Sultanate of Oman, 1995 (and additional analysis).                                                                    |
| Oman                                 | 1999          | 0-59.99  | National          | 14076 | HAZ, WAZ | 2   | Alasfoor D, Mohammed AJ. Implications of the use of the new WHO growth charts on the interpretation of malnutrition and obesity in infants and young children in Oman. Eastern Mediterranean Health Journal 2009;15:890-8 (and additional analysis). |
| Oman                                 | 2009          | 0-59.99  | National          | 8105  | HAZ, WAZ | 2   | Alasfoor D, Al Sayed M, AlShamakhi S, Al Ghamhari I. Second national PEM survey 2009. Ministry of Health. Muscat, Oman, 2011.                                                                                                                        |
| Pakistan                             | 1985-1987     | 6-59.99  | National          | 6707  | HAZ, WAZ | 3,5 | Government of Pakistan. National nutrition survey 1985-87 report. National Institute of Health, Nutrition Division. Islamabad, Pakistan, 1988 (and additional analysis).                                                                             |
| Pakistan                             | 1990-<br>1991 | 0-59.99  | National          | 4152  | HAZ, WAZ | 1   | DHS                                                                                                                                                                                                                                                  |
| Pakistan                             | 1990-<br>1994 | 0-59.99  | National          | 3240  | HAZ, WAZ | 2   | Nuruddin R and Azam I. National health survey of Pakistan (NHSP, 1990-94): Health profile of the people of Pakistan. Islamabad, Pakistan, 1998 (and additional analysis).                                                                            |
| Pakistan                             | 1995          | 0-59.99  | National          | 7368  | WAZ      | 3,5 | Ministry of Health. Multiple indicator cluster survey of Pakistan, 1995. MICS surveys. Government of Pakistan. Islamabad, Pakistan, 1996 (and additional analysis).                                                                                  |
| Pakistan                             | 1998          | 6-35.99  | First admin level | 4932  | HAZ, WAZ | 3,5 | CIETinternational, Sindh Bureau of Statistics, Government of Sindh, UNICEF Sindh. The bond of care: Technical Report, Sindh Province 1998. Karachi, Sindh Province: CIETinternational, 1999.                                                         |
| Pakistan                             | 2001          | 6-59.99  | National          | 9174  | HAZ, WAZ | 1   | Pakistan National Nutrition Survey 2001                                                                                                                                                                                                              |
| Pakistan                             | 2011          | 0-59.99  | National          | 28087 | HAZ, WAZ | 1   | Pakistan Nutritional Survey 2011                                                                                                                                                                                                                     |
| Panama                               | 1992          | 12-59.99 | National          | 1389  | HAZ, WAZ | 3,5 | Ministerio de Salud. Encuesta nacional de Vitamina A, 1992. Departamento de Nutricion y Dietetica. Panama, Republica de Panama, 1992.                                                                                                                |
| Panama                               | 1997          | 0-59.99  | National          | 2289  | HAZ, WAZ | 2   | Ministerio de Planificacion y Politica Economica. Encuesta de niveles de vida. 1997 Panama living standards survey (LSMS). Ciudad de Panama, Republica de Panama, 1998 (and additional analysis).                                                    |



|                  |           |         |                  |       |          |     |                                                                                                                                                                                                                                                                                                          |
|------------------|-----------|---------|------------------|-------|----------|-----|----------------------------------------------------------------------------------------------------------------------------------------------------------------------------------------------------------------------------------------------------------------------------------------------------------|
| Papua New Guinea | 1986-1987 | 0-59.99 | National (urban) | 530   | HAZ, WAZ | 3,5 | Jenkins C, Zemel B. Ancient diversity and contemporary change in the growth patterns of Papua New Guinea children. 59th Annual Meeting of the American Association of Physical Anthropologists. Miami, Florida, 1990.                                                                                    |
| Papua New Guinea | 2005      | 6-59.99 | National         | 924   | HAZ, WAZ | 2   | Department of Health of Papua New Guinea, UNICEF Papua New Guinea, University of Papua New Guinea, US Centers of Disease Control and Prevention. Papua New Guinea national micronutrient survey 2005: Final report. Port Moresby, Papua New Guinea, 2009 (and additional analysis).                      |
| Paraguay         | 1990      | 0-59.99 | National         | 3605  | HAZ, WAZ | 1   | DHS                                                                                                                                                                                                                                                                                                      |
| Paraguay         | 2005      | 0-59.99 | National         | 1700  | HAZ, WAZ | 2   | Sanabria MC. Informe final de consultoria: Analisis de la situacion de salud infantil y antropometria en menores de 5 años. Paraguay EPH 2005. Asuncion, Paraguay: PNUD Paraguay, 2006.                                                                                                                  |
| Peru             | 1991-1992 | 0-59.99 | National         | 7653  | HAZ, WAZ | 1   | DHS                                                                                                                                                                                                                                                                                                      |
| Peru             | 1994      | 0-59.99 | National         | 2070  | HAZ, WAZ | 1   | ENNIV 1994                                                                                                                                                                                                                                                                                               |
| Peru             | 1996      | 0-59.99 | National         | 14781 | HAZ, WAZ | 1   | DHS                                                                                                                                                                                                                                                                                                      |
| Peru             | 2000      | 0-59.99 | National         | 1835  | HAZ, WAZ | 1   | ENNIV 2000                                                                                                                                                                                                                                                                                               |
| Peru             | 2000      | 0-59.99 | National         | 11515 | HAZ, WAZ | 1   | DHS                                                                                                                                                                                                                                                                                                      |
| Peru             | 2003-2005 | 0-59.99 | National         | 2290  | HAZ, WAZ | 1   | DHS                                                                                                                                                                                                                                                                                                      |
| Peru             | 2006-2008 | 0-59.99 | National         | 8075  | HAZ, WAZ | 1   | DHS                                                                                                                                                                                                                                                                                                      |
| Peru             | 2009      | 0-59.99 | National         | 9183  | HAZ, WAZ | 3   | Instituto Nacional de Estadística e Informática (INEI), Agencia de los Estados Unidos Para el Desarrollo Internacional (USAID) y ORC Macro. Encuesta demografica y de salud familiar. Informe principal: ENDES continua 2009. Demographic and Health Surveys. Lima, Peru: INEI, USAID y ORC Macro, 2009. |
| Peru             | 2010      | 0-59.99 | National         | 8668  | HAZ, WAZ | 3   | Instituto Nacional de Estadística e Informática (INEI), Agencia de los Estados Unidos Para el Desarrollo Internacional (USAID) y ORC Macro. Encuesta demografica y de salud familiar. Informe principal: ENDES continua 2010. Demographic and Health Surveys. Lima, Peru: INEI, USAID y ORC Macro, 2009. |
| Philippines      | 1987      | 0-59.99 | National         | 2250  | HAZ, WAZ | 3,5 | Department of Science and Technology. Third National Nutrition Survey Philippines, 1987. Food and Nutrition Research Institute. Manila, Philippines; 1991 (and additional analysis).                                                                                                                     |
| Philippines      | 1989-1990 | 0-59.99 | National         | 5629  | HAZ, WAZ | 3,5 | National Economics and Statistics Section. Regional Updating of Nutritional Status of Filipino Children, 1989-90. Food and Nutrition Research Institute. Manila, Philippines; 1991 (and additional analysis).                                                                                            |
| Philippines      | 1992      | 0-59.99 | National         | 5858  | HAZ, WAZ | 3,5 | Department of Science and Technology. The 1992 regional nutrition survey. Food and Nutrition Research Institute. Manila, Philippines; 1994 (and additional analysis).                                                                                                                                    |
| Philippines      | 1993      | 0-59.99 | National         | 4229  | HAZ, WAZ | 3,5 | Department of Science and Technology. The fourth national nutrition survey: Philippines 1993. Food and Nutrition Institute. Manila, Philippines; 1995 (and additional analysis).                                                                                                                         |
| Philippines      | 1998      | 0-59.99 | National         | 24308 | HAZ, WAZ | 3,5 | Food and Nutrition Research Institute. The 5th national nutrition survey. Philippine nutrition: Facts & figures. Taguig, Metro Manila, Philippines: UNICEF, 2001 (and additional analysis).                                                                                                              |

|              |           |         |                  |       |          |       |                                                                                                                                                                                                                                                                                                        |
|--------------|-----------|---------|------------------|-------|----------|-------|--------------------------------------------------------------------------------------------------------------------------------------------------------------------------------------------------------------------------------------------------------------------------------------------------------|
| Philippines  | 2003      | 0-59.99 | National         | 3499  | HAZ, WAZ | 2     | Sixth National Nutrition Survey: Philippines, 2003. Food and Nutrition Research Institute, 2004.                                                                                                                                                                                                       |
| Philippines  | 2008      | 0-59.99 | National         | 18403 | HAZ, WAZ | 3     | Food and Nutrition Research Institute, Department of Science and Technology (FNRI-DOST). 7th national nutrition survey. Manila, Philippines: FNRI-DOST, 2010 (and additional analysis).                                                                                                                |
| Rwanda       | 1991-1992 | 0-59.99 | National (rural) | 1939  | HAZ, WAZ | 2,5   | Ministère de l'Agriculture et de l'Elevage. Statut nutritionnel et sécurité alimentaire au Rwanda: résultats de l'enquête nationale sur la nutrition et la sécurité alimentaire des enfants de 0 à 5 ans et leurs mères. Division des Statistiques Agricoles. Kigali, République Rwandaise, 1992.      |
| Rwanda       | 1992      | 0-59.99 | National         | 4280  | HAZ, WAZ | 1     | DHS                                                                                                                                                                                                                                                                                                    |
| Rwanda       | 1992      | 0-59.99 | National (rural) | 1639  | HAZ, WAZ | 2,5   | Ministère de l'Agriculture et de l'Élevage. Statut nutritionnel et sécurité alimentaire au Rwanda: résultats de l'enquête nationale sur la nutrition et la sécurité alimentaire des enfants de 0 à 5 ans et leurs mères. Division des Statistiques Agricoles. Kigali, République Rwandaise; Juin 1993. |
| Rwanda       | 1996      | 0-59.99 | National (rural) | 1115  | HAZ, WAZ | 3,5   | Ministère de la Santé. National nutrition survey of women and children in Rwanda in 1996. Kigali, République Rwandaise, 1997 (and additional analysis).                                                                                                                                                |
| Rwanda       | 2000      | 0-59.99 | National         | 6014  | HAZ, WAZ | 1     | DHS                                                                                                                                                                                                                                                                                                    |
| Rwanda       | 2000      | 0-59.99 | National         | 2700  | HAZ, WAZ | 1     | MICS                                                                                                                                                                                                                                                                                                   |
| Rwanda       | 2005      | 0-59.99 | National         | 3614  | HAZ, WAZ | 1     | DHS                                                                                                                                                                                                                                                                                                    |
| Rwanda       | 2010      | 0-59.99 | National         | 4050  | HAZ, WAZ | 1     | DHS                                                                                                                                                                                                                                                                                                    |
| Samoa        | 1999      | 0-59.99 | National         | 1107  | HAZ, WAZ | 3,5   | Mackerras D, Kiernan DM. Samoa national nutrition survey 1999. Part 3: Child growth, diet, contact with the health system and interview with carers. Technical report. Apia, Samoa: Nutrition Centre, 2003 (and additional analysis).                                                                  |
| Saudi Arabia | 1994      | 0-59.99 | National         | 23821 | HAZ, WAZ | 3,5   | Al-Mazrou YY, Al-Amoud MM, El-Gizouli SE, Khoja T, Al-Turki K, Tantawi N, Khalil MK, Aziz KM. Comparison of the growth standards between Saudi and American children aged 0-5 years. Saudi Medical Journal 2003;24:598-602 [Erratum Saudi Medical Journal 2003;24:1032] (and additional analysis).     |
| Saudi Arabia | 2004-2005 | 0-59.99 | National         | 15601 | HAZ, WAZ | 2     | El-Mouzan MI, Al-Herbish AS, Al-Salloum AA, Qurachi MM, Al-Omar AA. Growth charts for Saudi children and adolescents. Saudi Medical Journal 2007;28:1555-68 (and additional analysis).                                                                                                                 |
| Senegal      | 1986      | 6-35.99 | National         | 637   | HAZ, WAZ | 1     | DHS                                                                                                                                                                                                                                                                                                    |
| Senegal      | 1991-1992 | 0-35.99 | National         | NR    | HAZ, WAZ | 3,5,7 | Senegal Bureau of Statistics. Social Dimensions of Adjustment Household Priority Survey 1991-92. New York: The World Bank, 1993 (and additional analysis).                                                                                                                                             |
| Senegal      | 1992-1993 | 0-59.99 | National         | 4401  | HAZ, WAZ | 1     | DHS                                                                                                                                                                                                                                                                                                    |
| Senegal      | 1996      | 0-59.99 | National         | NR    | HAZ, WAZ | 3,5,7 | Evaluation des objectifs intermédiaires (MICS). Dakar: UNICEF, September 1996 (and additional analysis).                                                                                                                                                                                               |
| Senegal      | 2000      | 0-59.99 | National         | 8434  | HAZ, WAZ | 1     | MICS                                                                                                                                                                                                                                                                                                   |
| Senegal      | 2005      | 0-59.99 | National         | 2860  | HAZ, WAZ | 1     | DHS                                                                                                                                                                                                                                                                                                    |
| Senegal      | 2010-2011 | 0-59.99 | National         | 3701  | HAZ, WAZ | 1     | DHS                                                                                                                                                                                                                                                                                                    |
| Seychelles   | 1987-1988 | 0-59.99 | National         | 836   | HAZ, WAZ | 3,5   | Ministry of Health. Nutritional status of Seychellois children (unpublished data). Victoria, Seychelles, 1989 (and additional analysis).                                                                                                                                                               |

|                 |           |          |                  |      |          |     |                                                                                                                                                                                                                                                                                                                                                                                                                                            |
|-----------------|-----------|----------|------------------|------|----------|-----|--------------------------------------------------------------------------------------------------------------------------------------------------------------------------------------------------------------------------------------------------------------------------------------------------------------------------------------------------------------------------------------------------------------------------------------------|
| Sierra Leone    | 1989      | 0-59.99  | National         | 4424 | HAZ, WAZ | 3,5 | Ministry of Health. The Republic of Sierra Leone National Nutrition Survey. Freetown, Sierra Leone; 1990.                                                                                                                                                                                                                                                                                                                                  |
| Sierra Leone    | 1990      | 0-59.99  | National         | 4595 | HAZ, WAZ | 3,5 | Ministry of Health. The Republic of Sierra Leone National Nutrition Survey. Freetown, Sierra Leone; 1990.                                                                                                                                                                                                                                                                                                                                  |
| Sierra Leone    | 2000      | 0-59.99  | National         | 2224 | HAZ, WAZ | 1   | MICS                                                                                                                                                                                                                                                                                                                                                                                                                                       |
| Sierra Leone    | 2005      | 0-59.99  | National         | 5103 | HAZ, WAZ | 2   | Statistics Sierra Leone and UNICEF-Sierra Leone. Sierra Leone multiple indicator cluster survey 2005: Final Report. Freetown, Sierra Leone: Statistics Sierra Leone and UNICEF-Sierra Leone, 2007 (and additional analysis).                                                                                                                                                                                                               |
| Sierra Leone    | 2008      | 0-59.99  | National         | 1995 | HAZ, WAZ | 1   | DHS                                                                                                                                                                                                                                                                                                                                                                                                                                        |
| Solomon Islands | 1989      | 0-59.99  | National         | 3980 | HAZ, WAZ | 2   | Solomon Islands national nutrition survey 1989. Honiara, Solomon Islands, 1990 (and additional analysis).                                                                                                                                                                                                                                                                                                                                  |
| Solomon Islands | 2006-2007 | 0-59.99  | National         | 2029 | HAZ, WAZ | 3   | National Statistics Office (SISO), SPC and Macro International Inc. Solomon Islands 2006-2007 demographic and health survey. DHS. Noumea, New Caledonia: SISO, SPC and Macro International Inc., 2007 (accessed 22/12/09 <a href="http://www.spc.int/prism/Country/SB/Stats/Publication/DHS07/report/SI-DHS-REPORT_TOC_Summary.pdf">http://www.spc.int/prism/Country/SB/Stats/Publication/DHS07/report/SI-DHS-REPORT_TOC_Summary.pdf</a> ) |
| Somalia         | 2000      | 0-59.99  | National         | 3582 | HAZ, WAZ | 3,5 | UNICEF Somalia. Somalia end-decade multiple indicator cluster survey. Full technical report. Nairobi: UNICEF Somalia, 2001 (and additional analysis).                                                                                                                                                                                                                                                                                      |
| Somalia         | 2006      | 0-59.99  | National         | 5513 | HAZ, WAZ | 1   | MICS                                                                                                                                                                                                                                                                                                                                                                                                                                       |
| South Africa    | 1986      | 0-59.99  | National (rural) | 1745 | HAZ, WAZ | 3,5 | First RHOSA nutrition survey, anthropometric assessment of nutritional status in black under-fives in rural R.S.A. Epidemiological comments Vol 14 No 3. Pretoria: Department of National Health and Population Development, 1987.                                                                                                                                                                                                         |
| South Africa    | 1993-1994 | 6-59.99  | National         | 3689 | HAZ      | 2,5 | South Africans rich and poor: baseline household statistics. Project for statistics on living standards and development. Cape Town, 1994 (and additional analysis).                                                                                                                                                                                                                                                                        |
| South Africa    | 1994-1995 | 6-59.99  | National         | 9807 | HAZ, WAZ | 3,5 | The South African Vitamin A Consultative Group. Children aged 6 to 71 months in South Africa, 1994: their anthropometric, vitamin A, iron and immunisation coverage status. Johannesburg, South Africa, 1995 (and additional analysis).                                                                                                                                                                                                    |
| South Africa    | 1999      | 12-59.99 | National         | 1556 | HAZ, WAZ | 3,5 | Labadarios D, Steyn NP, Maunder E, MacIntyre U, Gericke G, Swart R, et al. The National Food Consumption Survey (NFCS): South Africa, 1999. Public Health Nutrition 2005;8:533-43 (and additional analysis).                                                                                                                                                                                                                               |
| South Africa    | 2003-2004 | 0-59.99  | National         | 1310 | HAZ, WAZ | 1   | DHS                                                                                                                                                                                                                                                                                                                                                                                                                                        |
| South Africa    | 2005      | 12-35.99 | National         | 846  | HAZ, WAZ | 3,5 | Department of Health, Republic of South Africa. National Food Consumption Survey - Fortification Baseline: Stellenbosch, South Africa: Directorate: Nutrition, Department of Health. 2005                                                                                                                                                                                                                                                  |
| South Africa    | 2008      | 0-59.99  | National         | 2079 | HAZ, WAZ | 3   | Ardington C, Case A. National income dynamics study (NIDS). Health: Analysis of the NIDS wave 1 dataset. Discussion paper no. 2. South Africa: The Presidency Republic of South Africa and SALDRU, 2009. <a href="http://www.nids.uct.ac.za/home/">http://www.nids.uct.ac.za/home/</a> accessed 15 April 2011.                                                                                                                             |
| Sri Lanka       | 1987      | 3-35.99  | National         | 1999 | HAZ, WAZ | 1   | DHS                                                                                                                                                                                                                                                                                                                                                                                                                                        |

|           |           |         |                  |       |          |     |                                                                                                                                                                                                                                                                                                                          |
|-----------|-----------|---------|------------------|-------|----------|-----|--------------------------------------------------------------------------------------------------------------------------------------------------------------------------------------------------------------------------------------------------------------------------------------------------------------------------|
| Sri Lanka | 1993      | 3-59.99 | National         | 3068  | HAZ, WAZ | 3,5 | Department of Census and Statistics, Ministry of Finance, Planning, Ethnic Affairs and National Inte Sri Lanka demographic and health survey 1993. Colombo, Sri Lanka, 1995.                                                                                                                                             |
| Sri Lanka | 1995      | 3-59.99 | National         | 2782  | HAZ, WAZ | 3,5 | Ramanujam P and Nestel P. Preliminary report on the fourth national nutrition and health survey July - August, 1995. The Ceylon Journal of Medical Science 1997;40:13-24.                                                                                                                                                |
| Sri Lanka | 1995-1996 | 6-59.99 | National         | 2304  | HAZ, WAZ | 3,5 | Medical Research Institute of the Ministry of Health and Indigenous Medicine. Vitamin A deficiency status of children in Sri Lanka, 1995/1996: A survey report. Colombo, Sri Lanka, 1998.                                                                                                                                |
| Sri Lanka | 2000      | 3-59.99 | National         | 2512  | HAZ, WAZ | 2   | Department of Census and Statistics and Ministry of Health, Nutrition and Welfare. Sri Lanka demographic and health survey 2000. Colombo, Sri Lanka, 2001 (and additional analysis).                                                                                                                                     |
| Sri Lanka | 2001      | 6-59.99 | National         | 1716  | HAZ, WAZ | 3,5 | Medical Research Institute of the Department of Health Services, Ministry of Health, Nutrition and Welfare. Assessment of anaemia status in Sri Lanka, 2001: A survey report. Colombo, Sri Lanka, 2003.                                                                                                                  |
| Sri Lanka | 2006-2007 | 0-59.99 | National         | 6649  | HAZ, WAZ | 3   | Department of Census and Statistics, Ministry of Health Care and Nutrition. Sri Lanka demographic and health survey 2006/07: Preliminary report and selected tables from the chapters of the final report (I:\UnitData\SURVEILLANCE\GDCGM\data sets\Sri Lanka\DHS_MoH 2006_07_WHO\DHS_web_links.htm, accessed 03/07/09). |
| Sri Lanka | 2009      | 0-59.99 | National         | 2589  | HAZ, WAZ | 2   | Jayatissa R. Nutrition and food security survey 2009. Colombo, Sri Lanka: Medical Research Institute, 2010.                                                                                                                                                                                                              |
| Sudan     | 1993      | 0-59.99 | Regional         | 3418  | HAZ, WAZ | 1   | PAPCHILD Sudan                                                                                                                                                                                                                                                                                                           |
| Sudan     | 1995      | 0-59.99 | Regional         | 3454  | HAZ, WAZ | 2   | Federal Ministry of Health, WHO, Ministries of Health/Nutrition Departments of 6 states. Comprehensive nutrition survey. National Nutrition Department. Khartoum, Sudan, 1997 (and additional analysis).                                                                                                                 |
| Sudan     | 2000      | 0-59.99 | Regional         | 18234 | HAZ, WAZ | 1   | SudanNorthMICS2                                                                                                                                                                                                                                                                                                          |
| Sudan     | 2000      | 1-59.99 | Regional (urban) | 877   | HAZ, WAZ | 1   | MICS                                                                                                                                                                                                                                                                                                                     |
| Sudan     | 2006      | 0-59.99 | National         | 19801 | HAZ, WAZ | 2   | Government of National Unity and Government of Southern Sudan. Sudan household health survey (SHHS) - 2006. Khartoum and Juba: Government of National Unity, Government of Southern Sudan, December 2007 (additional analysis conducted by PAPFAM, June 2009).                                                           |
| Sudan     | 2010      | 0-59.99 | National         | NR    | HAZ, WAZ | 3,7 | National Ministry of Health and Central Bureau of Statistics, Sudan Sudan Household Health Survey Second Round 2010 Summary Report, August 2011                                                                                                                                                                          |
| Suriname  | 2000      | 0-59.99 | National         | 1411  | HAZ, WAZ | 1   | MICS                                                                                                                                                                                                                                                                                                                     |
| Suriname  | 2006      | 0-59.99 | National         | 1992  | HAZ, WAZ | 2   | General Bureau of Statistics, Ministry of Planning and Development Cooperation and Ministry of Social Affairs and Housing. Suriname multiple indicator cluster survey 2006, Final Report (MICS3). Paramaribo, Suriname, 2009 (and additional analysis).                                                                  |
| Swaziland | 2000      | 0-59.99 | National         | 3200  | HAZ, WAZ | 1   | MICS                                                                                                                                                                                                                                                                                                                     |
| Swaziland | 2006-2007 | 0-59.99 | National         | 2027  | HAZ, WAZ | 1   | DHS                                                                                                                                                                                                                                                                                                                      |

|                       |           |         |          |       |          |     |                                                                                                                                                                                                                                                                   |
|-----------------------|-----------|---------|----------|-------|----------|-----|-------------------------------------------------------------------------------------------------------------------------------------------------------------------------------------------------------------------------------------------------------------------|
| Swaziland             | 2008      | 0-59.99 | National | 3823  | HAZ, WAZ | 3   | Ministry of Health, National Nutrition Council. Swaziland national nutrition survey report (November 2008). Mbabane, Swaziland: Ministry of Health, 2009.                                                                                                         |
| Swaziland             | 2010      | 0-59.99 | National | 2555  | HAZ, WAZ | 2   | Central Statistical Office, Kingdom of Swaziland Multiple Indicator Cluster Survey 2010 Preliminary Report, Central Statistical Office, Kingdom of Swaziland                                                                                                      |
| Syrian Arab Republic  | 1993      | 0-59.99 | National | 3959  | HAZ, WAZ | 1   | PAPCHILD Syrian Arab Republic                                                                                                                                                                                                                                     |
| Syrian Arab Republic  | 1995      | 0-59.99 | National | 2425  | HAZ, WAZ | 3,5 | Prime Minister's Council. Multiple indicator cluster survey in the Syrian Arab Republic (MICS). Central Bureau of Statistics. Damascus, The Syrian Arab Republic, 1996.                                                                                           |
| Syrian Arab Republic  | 2000      | 0-59.99 | National | 6262  | HAZ, WAZ | 3,5 | Council of Ministers, Central Office of Statistics, Arab Republic of Syria, and UNICEF [Multiple Indicator Cluster Survey II (MICS II) concerning Child Health and Welfare. Main report.] Damascus, Syrian Arab Republic: UNICEF, 2002 (and additional analysis). |
| Syrian Arab Republic  | 2001      | 0-59.99 | National | 6367  | HAZ, WAZ | 2   | League of Arab States (PAPFAM) and Syrian Arab Republic, Office of the Prime Minister, Central Bureau of Statistics. The family health survey in the Syrian Arab Republic. Principal Report. Cairo: The League of Arab States, 2002 (and additional analysis).    |
| Syrian Arab Republic  | 2006      | 0-59.99 | National | 9906  | HAZ, WAZ | 1   | MICS                                                                                                                                                                                                                                                              |
| Syrian Arab Republic  | 2009      | 0-59.99 | National | 14392 | HAZ, WAZ | 2   | League of Arab States and Syrian Arab Republic. Family health survey of the Arab Republic of Syria 2009: Principal report (PAPFAM). Cairo: The League of Arab States, 2011 (and additional analysis).                                                             |
| São Tomé and Príncipe | 1986      | 0-59.99 | National | 2155  | HAZ, WAZ | 3,5 | Ministerio de Saude. Estado nutricional e cobertura vacinal des criancas menores de 5 anos na. Seccao de Nutricao. Sao Tome, Republica Democratica de Sao Tome e Principe, 1986 (and additional analysis).                                                        |
| São Tomé and Príncipe | 2000      | 0-59.99 | National | 1677  | HAZ, WAZ | 1   | MICS                                                                                                                                                                                                                                                              |
| São Tomé and Príncipe | 2006      | 0-59.99 | National | 2848  | HAZ, WAZ | 3,5 | Institute of National Statistics (INE). Democratic Republic of Sao Tome e Principe 2006 multiple indicator cluster survey (MICS3): Final report. Sao Tome: INE and UNICEF, 2007.                                                                                  |
| São Tomé and Príncipe | 2008-2009 | 0-59.99 | National | 1430  | HAZ, WAZ | 1   | DHS                                                                                                                                                                                                                                                               |
| Tajikistan            | 1999      | 6-59.99 | National | 3599  | HAZ      | 3,5 | McBurney R and Mason F. National nutrition survey, Tajikistan (September/October 1999). London, UK: Action Against Hunger UK, 2000 (and additional analysis).                                                                                                     |
| Tajikistan            | 2000      | 6-59.99 | National | 5657  | HAZ      | 3,5 | McLachlan E. National nutrition survey of Tajikistan (September/October 2000). London, UK: Action Against Hunger UK, 2001 (and additional analysis).                                                                                                              |
| Tajikistan            | 2001      | 6-59.99 | National | 3704  | HAZ      | 3,5 | Walters T, Brown R. Representative national nutrition survey Tajikistan (Sughd, RRS, Kouliab and Kurgan Teppe regions), October/November 2001. London, UK: Action Against Hunger UK, 2002 (and additional analysis).                                              |

|             |           |          |          |       |          |     |                                                                                                                                                                                                                                                                                                                                                                                                             |
|-------------|-----------|----------|----------|-------|----------|-----|-------------------------------------------------------------------------------------------------------------------------------------------------------------------------------------------------------------------------------------------------------------------------------------------------------------------------------------------------------------------------------------------------------------|
| Tajikistan  | 2002      | 6-59.99  | National | 4543  | HAZ      | 3,5 | Moloney G and Brown R. National nutrition survey Tajikistan, May/June 2002. Action against Hunger and European Community Humanitarian Office, 2002 (and additional analysis).                                                                                                                                                                                                                               |
| Tajikistan  | 2003      | 6-59.99  | National | 4654  | HAZ      | 3,5 | Baronina E, Brasell-Jones T, Petersen J, Purves M. National nutrition and water & sanitation survey, Tajikistan, October 2003. Dushanbe, Tajikistan: Action Against Hunger (lead agency nutrition) and Mercy Corps (lead agency wat/san), 2004 (and additional analysis).                                                                                                                                   |
| Tajikistan  | 2005      | 0-59.99  | National | 4065  | HAZ, WAZ | 1   | MICS                                                                                                                                                                                                                                                                                                                                                                                                        |
| Tajikistan  | 2007      | 0-59.99  | National | 2544  | HAZ, WAZ | 3   | State Committee on Statistics [Republic of Tajikistan] and UNICEF. Tajikistan living standards measurement survey 2007 (TLSS): Indicators at a glance. Dushanbe, Republic of Tajikistan: State Committee on Statistics and UNICEF, 2009<br>( <a href="http://www.tojikinfo.tj/en/.../UNICEF%20TLSS%20Report%20Eng.pdf">www.tojikinfo.tj/en/.../UNICEF%20TLSS%20Report%20Eng.pdf</a> , accessed 09/06/2011). |
| Thailand    | 1987      | 3-35.99  | National | 1848  | HAZ, WAZ | 1   | DHS                                                                                                                                                                                                                                                                                                                                                                                                         |
| Thailand    | 1993      | 0-59.99  | National | 11748 | HAZ, WAZ | 3,5 | Kitvorapat W, Chaotilittakul N, Sinawat S, Wanaratana L. Random survey on nutritional status of children of ages under five. Thailand Journal of Health Promotion and Environmental Health 1996;19:57-66 (and additional analysis). Ministry of Public Health. The fourth national nutrition survey of Thailand 1995. Department of Health. Bangkok, Thailand 1998 (and additional analysis).               |
| Thailand    | 1995      | 0-59.99  | National | 4178  | HAZ, WAZ | 3,5 | NHES 2                                                                                                                                                                                                                                                                                                                                                                                                      |
| Thailand    | 1997      | 12-59.99 | National | 2599  | HAZ, WAZ | 1   | MICS                                                                                                                                                                                                                                                                                                                                                                                                        |
| Thailand    | 2005-2006 | 0-59.99  | National | 9002  | HAZ, WAZ | 1   | Multiple indicator cluster survey (MICS - 2002). UNICEF, Dili, Timor-Leste, 2003 (and additional analysis).                                                                                                                                                                                                                                                                                                 |
| Timor-Leste | 2002      | 0-59.99  | National | 4133  | HAZ, WAZ | 2   | Ministry of Health (MOH) Timor Leste, University of Newcastle, Australian National University and ACIL. Timor Leste 2003 demographic and health survey. Newcastle, NSW, Australia: MOH and University of Newcastle, 2003 (and additional analysis).                                                                                                                                                         |
| Timor-Leste | 2003      | 0-59.99  | National | 5255  | HAZ, WAZ | 3,5 | DHS                                                                                                                                                                                                                                                                                                                                                                                                         |
| Timor-Leste | 2009-2010 | 0-59.99  | Regional | 6975  | HAZ, WAZ | 1,6 | Ministère de la Santé Publique, Ministère du Plan et des Mines, Ministère du Développement Rural. Politique nationale d'alimentation et de nutrition. Document de synthèse. Lomé, République Togolaise, 1989 (and additional analysis).                                                                                                                                                                     |
| Togo        | 1988      | 6-59.99  | National | 2866  | HAZ, WAZ | 3,5 | DHS                                                                                                                                                                                                                                                                                                                                                                                                         |
| Togo        | 1988      | 0-35.99  | National | 1656  | HAZ, WAZ | 1   | Enquête nationale sur la situation des enfants au Togo en 1995 (MICS -Togo -96). Lomé, République Togolaise: Ministère du Plan et de l'Aménagement du Territoire et UNICEF, September 1996.                                                                                                                                                                                                                 |
| Togo        | 1996      | 0-59.99  | National | 3761  | HAZ, WAZ | 3,5 | DHS                                                                                                                                                                                                                                                                                                                                                                                                         |
| Togo        | 1998      | 0-35.99  | National | 3614  | HAZ, WAZ | 1   | Direction Generale de la Statistique et de la Comptabilité Nationale and UNICEF. Résultats de l'enquête nationale à indicateurs multiples, Togo 2006. Rapport final, août 2007.<br><a href="http://www.childinfo.org/mics3_surveys.html">http://www.childinfo.org/mics3_surveys.html</a> , accessed 8 January 2009 (and additional analysis).                                                               |
| Togo        | 2006      | 0-59.99  | National | 3581  | HAZ, WAZ | 2   |                                                                                                                                                                                                                                                                                                                                                                                                             |

|                     |                |         |          |       |          |     |                                                                                                                                                                                                                                                                                                                                                                                                                                                           |
|---------------------|----------------|---------|----------|-------|----------|-----|-----------------------------------------------------------------------------------------------------------------------------------------------------------------------------------------------------------------------------------------------------------------------------------------------------------------------------------------------------------------------------------------------------------------------------------------------------------|
| Togo                | 2008           | 0-59.99 | National | 3204  | HAZ, WAZ | 3   | Ministère de la Santé et UNICEF. Rapport d'enquête nationale nutrition et survie des enfants de 0 à 59 mois, pratique d'alimentation de nourrisson et du jeune enfants. SMART. Togo, décembre 2008 (30/12/09 <a href="http://ochaonline.un.org/CoordinationIASC/Securitealimentairenutrition/tabid/5651/language/fr-FR/Default.aspx">http://ochaonline.un.org/CoordinationIASC/Securitealimentairenutrition/tabid/5651/language/fr-FR/Default.aspx</a> ). |
| Togo                | 2010           | 0-59.99 | National | 4752  | HAZ, WAZ | 3   | Direction Generale de la Statistique et de la Comptabilite Nationale, Togo Togo. Enquete par grappes a indicateurs multiple (MICS) 2010: Resultats preliminaires, Mai 2011, Direction Generale de la Statistique et de la Comptabilite Nationale                                                                                                                                                                                                          |
| Tonga               | 1986           | 0-59.99 | National | 1094  | HAZ      | 3,5 | Maclean E, Badcock J, Bach F. The 1986 national nutrition survey of the Kingdom of Tonga. Technical report National Food and Nutrition Committee. Nuku'alofa: Government of the Kingdom of Tonga, 1987 (and additional analysis).                                                                                                                                                                                                                         |
| Trinidad and Tobago | 1987           | 3-35.99 | National | 838   | HAZ, WAZ | 1   | DHS                                                                                                                                                                                                                                                                                                                                                                                                                                                       |
| Trinidad and Tobago | 2000           | 0-59.99 | National | 780   | HAZ, WAZ | 2   | Multiple indicator cluster survey Trinidad and Tobago: Full report. UNICEF website <a href="http://www.childinfo.org/MICS2/newreports/trinidad/trinidad.htm">http://www.childinfo.org/MICS2/newreports/trinidad/trinidad.htm</a> , accessed 17/11/2003 (and additional analysis).                                                                                                                                                                         |
| Tunisia             | 1988-1993-1994 | 3-35.99 | National | 2007  | HAZ, WAZ | 1   | DHS                                                                                                                                                                                                                                                                                                                                                                                                                                                       |
| Tunisia             | 1994           | 0-59.99 | National | 3030  | HAZ, WAZ | 1   | PAPCHILD Tunisia                                                                                                                                                                                                                                                                                                                                                                                                                                          |
| Tunisia             | 1996-1997      | 0-59.99 | National | 891   | HAZ, WAZ | 3,5 | Ministère de la Santé Publique, Institut National de Nutrition et de Technologie Alimentaire. Enquête nationale 1996-1997. Evaluation de l'état nutritionnel de la population Tunisienne: Rapport national. Tunis, Tunisia: Sotepa Grafic, 1998 (and additional analysis).                                                                                                                                                                                |
| Tunisia             | 2000           | 0-59.99 | National | 10310 | HAZ, WAZ | 3,5 | Tunisia multiple indicator cluster survey II 2000 (MICS II). Tunis, Tunisia: 2000 (and additional analysis).                                                                                                                                                                                                                                                                                                                                              |
| Tunisia             | 2006           | 0-59.99 | National | 2843  | HAZ, WAZ | 2   | Ministère de la Santé Publique, Office National de la Famille et de la Population et UNICEF. Enquête sur la santé et le bien être de la mère et l'enfant: MICS 3. Tunis, Tunisia, 2008 (and additional analysis conducted by PAPFAM).                                                                                                                                                                                                                     |
| Turkey              | 1993           | 0-59.99 | National | 3134  | HAZ, WAZ | 1   | DHS                                                                                                                                                                                                                                                                                                                                                                                                                                                       |
| Turkey              | 1995           | 0-59.99 | National | 2871  | WAZ      | 3,5 | Ministry of Health. Multiple indicator cluster survey in Turkey 1995. Ankara: National Bureau of Statistics, 1996 (and additional analysis).                                                                                                                                                                                                                                                                                                              |
| Turkey              | 1998           | 0-59.99 | National | 2774  | HAZ, WAZ | 1   | DHS                                                                                                                                                                                                                                                                                                                                                                                                                                                       |
| Turkey              | 2003-2004      | 0-59.99 | National | 4005  | HAZ, WAZ | 1   | DHS                                                                                                                                                                                                                                                                                                                                                                                                                                                       |
| Turkmenistan        | 2000           | 0-59.99 | National | 2928  | HAZ, WAZ | 3,5 | Gurbansoltan Eje Clinical Research Center for MCH (GECRCMCH), Ministry of Health & Medical Industry. Turkmenistan demographic and health survey 2000. Demographic and Health Surveys. Calverton, Maryland, USA: GECRCMCH and ORC Macro, 2001 (and additional analysis).                                                                                                                                                                                   |
| Uganda              | 1989           | 0-59.99 | National | 3649  | HAZ, WAZ | 1   | DHS                                                                                                                                                                                                                                                                                                                                                                                                                                                       |
| Uganda              | 1995           | 0-47.99 | National | 4540  | HAZ, WAZ | 1   | DHS                                                                                                                                                                                                                                                                                                                                                                                                                                                       |
| Uganda              | 2000-2001      | 0-59.99 | National | 5114  | HAZ, WAZ | 1   | DHS                                                                                                                                                                                                                                                                                                                                                                                                                                                       |
| Uganda              | 2006           | 0-59.99 | National | 2354  | HAZ, WAZ | 1   | DHS                                                                                                                                                                                                                                                                                                                                                                                                                                                       |

|                                    |           |         |                   |       |          |     |                                                                                                                                                                                                                                                                                                                                                                                          |
|------------------------------------|-----------|---------|-------------------|-------|----------|-----|------------------------------------------------------------------------------------------------------------------------------------------------------------------------------------------------------------------------------------------------------------------------------------------------------------------------------------------------------------------------------------------|
| United Republic of Tanzania        | 1991      | 0-59.99 | First admin level | 3446  | HAZ, WAZ | 3,5 | Mpanju WFK, Msamanga GI, Gerardinck IHA, Kabalimu TK, Kawau FMN, Rongo LMB, et al. Assessment of nutritional status and associated factors of under-fives in Dar es Salaam region from 9-23 September 1991. Institute of Public Health, Muhimbili University College of Health Sciences. Dar es Salaam, Tanzania; 1992.                                                                  |
| United Republic of Tanzania        | 1991-1992 | 0-59.99 | National          | 6311  | HAZ, WAZ | 1   | DHS                                                                                                                                                                                                                                                                                                                                                                                      |
| United Republic of Tanzania        | 1996      | 0-59.99 | First admin level | 1654  | HAZ, WAZ | 3,5 | Monitoring progress towards the goals of the world summit for children through multiple indicator cluster survey, 1996 (MICS). Bureau of Statistics. Dar es Salaam, United Republic of Tanzania, 1996.                                                                                                                                                                                   |
| United Republic of Tanzania        | 1996      | 0-59.99 | National          | 5298  | HAZ, WAZ | 1   | DHS                                                                                                                                                                                                                                                                                                                                                                                      |
| United Republic of Tanzania        | 1996      | 0-59.99 | Regional          | 3939  | HAZ, WAZ | 3,5 | Monitoring progress towards the goals of the world summit for children through multiple indicator cluster survey, 1996 (MICS). Bureau of Statistics. Dar es Salaam, United Republic of Tanzania, 1996.                                                                                                                                                                                   |
| United Republic of Tanzania        | 1999      | 0-59.99 | National          | 2510  | HAZ, WAZ | 1   | DHS                                                                                                                                                                                                                                                                                                                                                                                      |
| United Republic of Tanzania        | 2004-2005 | 0-59.99 | National          | 7114  | HAZ, WAZ | 1   | DHS                                                                                                                                                                                                                                                                                                                                                                                      |
| United Republic of Tanzania        | 2009-2010 | 0-59.99 | National          | 6740  | HAZ, WAZ | 1   | DHS                                                                                                                                                                                                                                                                                                                                                                                      |
| Uzbekistan                         | 1996      | 0-35.99 | National          | 935   | HAZ, WAZ | 1   | DHS                                                                                                                                                                                                                                                                                                                                                                                      |
| Uzbekistan                         | 2002      | 0-59.99 | National          | 2525  | HAZ, WAZ | 2   | Analytical and Information Center, Ministry of Health of the Republic of Uzbekistan, State Department of Statistics, Ministry of Macroeconomics and Statistics [Uzbekistan], and ORC Macro. Uzbekistan health examination survey 2002. Demographic and Health Surveys. Calverton, Maryland, USA: Analytical and Information Center, State Department of Statistics, and ORC Macro, 2004. |
| Uzbekistan                         | 2006      | 0-59.99 | National          | 4704  | HAZ, WAZ | 1   | MICS                                                                                                                                                                                                                                                                                                                                                                                     |
| Vanuatu                            | 1996      | 0-59.99 | National          | 1297  | HAZ, WAZ | 3,5 | Department of Health [Vanuatu] and Australian Agency for International Development (AusAID). Report of the second national nutrition survey 1996. Government of the Republic of Vanuatu, Department of Health and AusAID, 1998 (and additional analysis).                                                                                                                                |
| Vanuatu                            | 2007      | 0-59.99 | National          | 1215  | HAZ, WAZ | 1   | MICS                                                                                                                                                                                                                                                                                                                                                                                     |
| Venezuela (Bolivarian Republic of) | 1987      | 0-59.99 | National          | 18023 | HAZ, WAZ | 3,5 | Proyecto Venezuela 1987. Caracas: Centro de estudios sobre crecimiento y desarrollo de la poblacion venezolana, 1995 (and additional analysis).                                                                                                                                                                                                                                          |
| Viet Nam                           | 1987-1989 | 0-59.99 | National          | 7044  | HAZ, WAZ | 3,5 | Ministry of Health. Report on re-analyzed data collected by the General Nutrition Survey 1987-89. Department of Planning. Hanoi, Viet Nam, 1991 (and additional analysis).                                                                                                                                                                                                               |
| Viet Nam                           | 1992-1993 | 0-59.99 | National          | 2833  | HAZ, WAZ | 2   | Viet Nam living standards survey 1992-93 (VNLSS). Washington, D.C.: The World Bank, 1998 (and additional analysis).                                                                                                                                                                                                                                                                      |



|          |           |         |          |       |          |     |                                                                                                                                                                                                                                                                                                                                            |
|----------|-----------|---------|----------|-------|----------|-----|--------------------------------------------------------------------------------------------------------------------------------------------------------------------------------------------------------------------------------------------------------------------------------------------------------------------------------------------|
| Viet Nam | 1994      | 0-59.99 | National | 37764 | HAZ, WAZ | 3,5 | Bloem MW, Gorstein J. Viet Nam: Xerophthalmia free; 1994 national Vitamin A deficiency and protein-energy malnutrition prevalence survey. Consultancy report 5-17 March 1995. National Institute of Nutrition. Hanoi, Viet Nam, 1995 (and additional analysis).                                                                            |
| Viet Nam | 1997-1998 | 0-59.99 | National | 2848  | HAZ, WAZ | 1   | Vietnam Living Standards Survey, 1997-98 Dibley MJ, Khoi HH, Khan NC, Tam NC, Tuyen LD, Do TT, Mai LB. National protein energy malnutrition survey, Viet Nam 1998. National Institute of Nutrition, Hanoi, Viet Nam and Centre for Clinical Epidemiology & Biostatistics, Newcastle, Australia, 1999 (and additional analysis).            |
| Viet Nam | 1998      | 0-59.99 | National | 12919 | HAZ, WAZ | 3,5 | Tuyen le D. Annual national nutrition monitoring. Nutrition Surveillance Department. Hanoi, Vietnam: National Institute of Nutrition, 2009 (and additional analysis).                                                                                                                                                                      |
| Viet Nam | 1999      | 0-59.99 | National | 1541  | HAZ, WAZ | 2   | Khoi HH, Khan NC, Tuyen LD, Ngu T, Xuan TT. 1999 Viet Nam - child nutrition situation. The national goal for child malnutrition control. Hanoi: Medical Publishing House, 2000 (and additional analysis).                                                                                                                                  |
| Viet Nam | 1999      | 0-59.99 | National | 93469 | HAZ, WAZ | 3,5 |                                                                                                                                                                                                                                                                                                                                            |
| Viet Nam | 2000      | 0-59.99 | National | 2983  | HAZ, WAZ | 1   | MICS                                                                                                                                                                                                                                                                                                                                       |
| Viet Nam | 2000      | 0-59.99 | National | 1579  | HAZ, WAZ | 2   | Tuyen le D. Annual national nutrition monitoring. Nutrition Surveillance Department. Hanoi, Vietnam: National Institute of Nutrition, 2009 (and additional analysis).                                                                                                                                                                      |
| Viet Nam | 2000      | 0-59.99 | National | 94469 | HAZ, WAZ | 3,5 | National Institute of Nutrition and General Statistical Office. 2000 - Vietnam child and mother nutrition situation. Hanoi: Medical Publishing House, 2001 (and additional analysis).                                                                                                                                                      |
| Viet Nam | 2001-2002 | 0-59.99 | National | 11145 | HAZ, WAZ | 1   | VNHS 2002                                                                                                                                                                                                                                                                                                                                  |
| Viet Nam | 2002      | 0-59.99 | National | 1531  | HAZ, WAZ | 2   | Tuyen le D. Annual national nutrition monitoring. Nutrition Surveillance Department. Hanoi, Vietnam: National Institute of Nutrition, 2009 (and additional analysis).                                                                                                                                                                      |
| Viet Nam | 2003      | 0-59.99 | National | 1457  | HAZ, WAZ | 2   | Tuyen le D. Annual national nutrition monitoring. Nutrition Surveillance Department. Hanoi, Vietnam: National Institute of Nutrition, 2009 (and additional analysis).                                                                                                                                                                      |
| Viet Nam | 2004      | 0-59.99 | National | 1499  | HAZ, WAZ | 2   | Tuyen le D. Annual national nutrition monitoring. Nutrition Surveillance Department. Hanoi, Vietnam: National Institute of Nutrition, 2009 (and additional analysis).                                                                                                                                                                      |
| Viet Nam | 2005      | 0-59.99 | National | 1493  | HAZ, WAZ | 2   | Tuyen le D. Annual national nutrition monitoring. Nutrition Surveillance Department. Hanoi, Vietnam: National Institute of Nutrition, 2009 (and additional analysis).                                                                                                                                                                      |
| Viet Nam | 2006      | 0-59.99 | National | 1532  | HAZ, WAZ | 2   | Tuyen le D. Annual national nutrition monitoring. Nutrition Surveillance Department. Hanoi, Vietnam: National Institute of Nutrition, 2009 (and additional analysis).                                                                                                                                                                      |
| Viet Nam | 2006      | 0-59.99 | National | 2680  | HAZ, WAZ | 3   | National household living standard survey 2006 (VHLSS2006). Results reported in Viet Nam multiple indicator cluster survey 2006 - MICS3. Ha Noi, Viet Nam, 2007 (accessed 3 July 2008 <a href="http://www.childinfo.org/files/MICS3_Vietnam_FinalReport_2006.pdf">http://www.childinfo.org/files/MICS3_Vietnam_FinalReport_2006.pdf</a> ). |

|          |            |         |                  |       |          |       |                                                                                                                                                                                                                                                                                                                                                                         |
|----------|------------|---------|------------------|-------|----------|-------|-------------------------------------------------------------------------------------------------------------------------------------------------------------------------------------------------------------------------------------------------------------------------------------------------------------------------------------------------------------------------|
| Viet Nam | 2007       | 0-59.99 | National         | 1507  | HAZ, WAZ | 2     | Tuyen le D. Annual national nutrition monitoring. Nutrition Surveillance Department. Hanoi, Vietnam: National Institute of Nutrition, 2009 (and additional analysis).                                                                                                                                                                                                   |
| Viet Nam | 2008       | 0-59.99 | National         | 1483  | HAZ, WAZ | 2     | Tuyen le D. Annual national nutrition monitoring. Nutrition Surveillance Department. Hanoi, Vietnam: National Institute of Nutrition, 2009 (and additional analysis).                                                                                                                                                                                                   |
| Yemen    | 1991       | 0-59.99 | National         | 2520  | HAZ, WAZ | 1     | PAPCHILD Yemen                                                                                                                                                                                                                                                                                                                                                          |
| Yemen    | 1996       | 0-59.99 | National         | 3833  | HAZ, WAZ | 3,5   | Yemen multiple indicator cluster survey (March 1996): Final results. Ministry of Planning and Development. Sanaa, Republic of Yemen, 1996 (and additional analysis).                                                                                                                                                                                                    |
| Yemen    | 1997       | 0-59.99 | National         | 10793 | HAZ, WAZ | 2     | Yemen demographic and maternal and child health survey 1997. Demographic and Health Surveys. Central Statistical Organization. Sana'a, Yemen, 1998 (and additional analysis).                                                                                                                                                                                           |
| Yemen    | 2003-2005- | 0-59.99 | National         | 12364 | HAZ, WAZ | 2     | The Republic of Yemen Ministry of Health & Population, Central Statistical Organization an League of Arab States. The Yemen family health survey: Principal report. Pan Arab Project for Family Health. Cairo, Egypt: The Republic of Yemen Ministry of Health & Population, Central Statistical Organization an League of Arab States, 2004 (and additional analysis). |
| Yemen    | 2006       | 0-59.99 | National         | 12704 | HAZ, WAZ | 1     | Yemen Household Budget Survey 2005-2006 Cogill B, Zaza M. Report of the Nutrition Module as Part of the Crop Forecasting Survey - Rural Zambia 1990. Ministry of Health. Lusaka, Zambia; 1990.                                                                                                                                                                          |
| Zambia   | 1990       | 6-59.99 | National (rural) | 2000  | HAZ, WAZ | 3,5   |                                                                                                                                                                                                                                                                                                                                                                         |
| Zambia   | 1992       | 0-59.99 | National         | 4888  | HAZ, WAZ | 1     | DHS                                                                                                                                                                                                                                                                                                                                                                     |
| Zambia   | 1995-1996- | 0-59.99 | National         | NR    | HAZ      | 3,5,7 | Food Security, Health and Nutrition Information System, National Commission for Development Planning, Central Statistics Office. Zambia's children in 1995: Key results of a survey to monitor progress towards goals for children (MICS2). Lusaka, Zambia: Government of the Republic of the Zambia, 1997 (and additional analysis).                                   |
| Zambia   | 1997-2001- | 0-59.99 | National         | 5470  | HAZ, WAZ | 1     | DHS                                                                                                                                                                                                                                                                                                                                                                     |
| Zambia   | 2002-2004- | 0-59.99 | National         | 5394  | HAZ, WAZ | 1     | DHS                                                                                                                                                                                                                                                                                                                                                                     |
| Zambia   | 2005       | 0-59.99 | National         | 6865  | HAZ, WAZ | 1     | Living Conditions Monitoring Survey IV                                                                                                                                                                                                                                                                                                                                  |
| Zambia   | 2007-1988- | 0-59.99 | National         | 5063  | HAZ, WAZ | 1     | DHS                                                                                                                                                                                                                                                                                                                                                                     |
| Zimbabwe | 1989       | 3-59.99 | National         | 2448  | HAZ, WAZ | 1     | DHS                                                                                                                                                                                                                                                                                                                                                                     |
| Zimbabwe | 1994       | 0-35.99 | National         | 2081  | HAZ, WAZ | 1     | DHS                                                                                                                                                                                                                                                                                                                                                                     |
| Zimbabwe | 1999-2005- | 0-59.99 | National         | 2610  | HAZ, WAZ | 1     | DHS                                                                                                                                                                                                                                                                                                                                                                     |
| Zimbabwe | 2006-2010- | 0-59.99 | National         | 3878  | HAZ, WAZ | 1     | DHS                                                                                                                                                                                                                                                                                                                                                                     |
| Zimbabwe | 2011       | 0-59.99 | National         | 4276  | HAZ, WAZ | 1     | DHS                                                                                                                                                                                                                                                                                                                                                                     |

\*1=individual-level data; 2=means and prevalences; 3=only prevalences; 4=surveillance data; 5=estimate converted from NCHS reference to WHO standards; 6=data collection in Aileu province deemed unreliable, province excluded and study marked as regional; 7=sample size not reported, sample size assumed to be 400; 8=included in analysis because total sample size (including other age groups or regions) exceeds 400.

**Appendix Figure 1.** Urban-rural differences in prevalences of stunting and underweight (in percentage points). A negative number indicates higher prevalence in rural children than in urban children; a positive number indicates the opposite.

(a) urban–rural difference in stunting

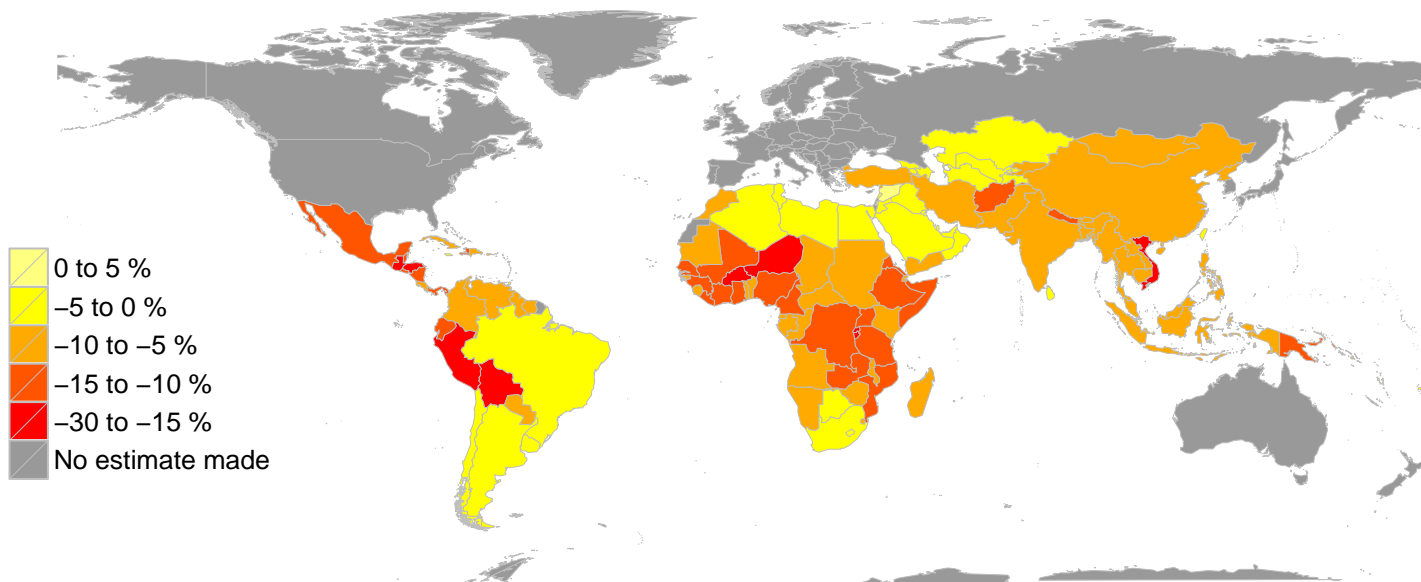

(b) urban–rural difference in underweight

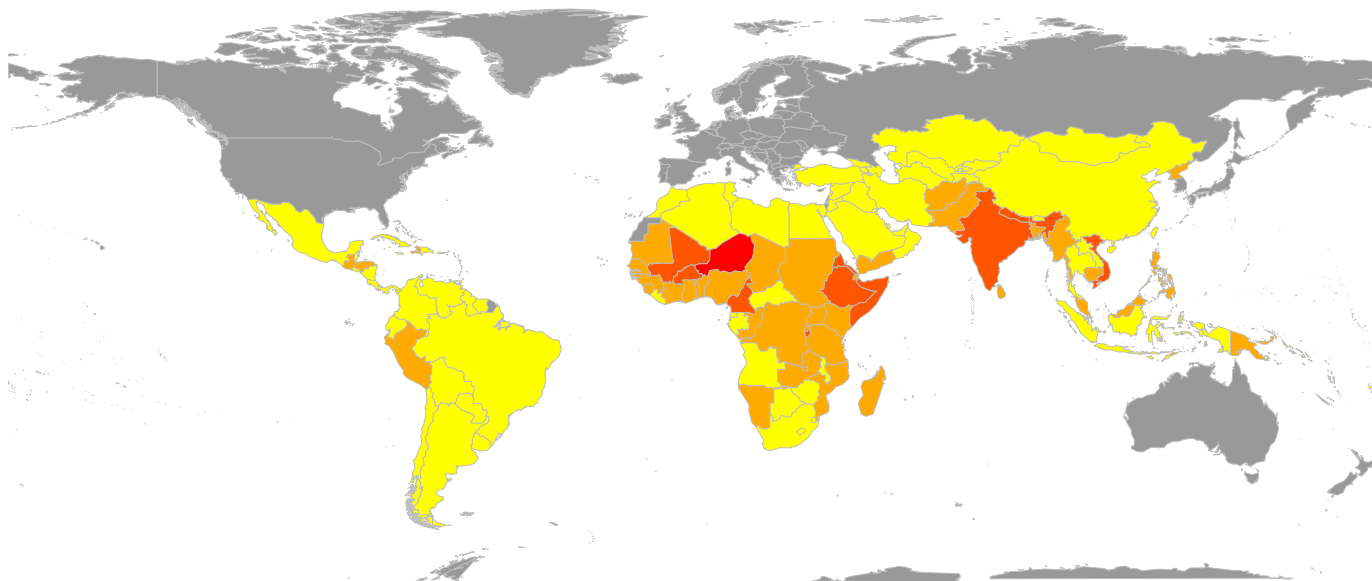

**Appendix Figure 2.** Trends in rural (blue) and urban (orange) prevalences of stunting and underweight by region.

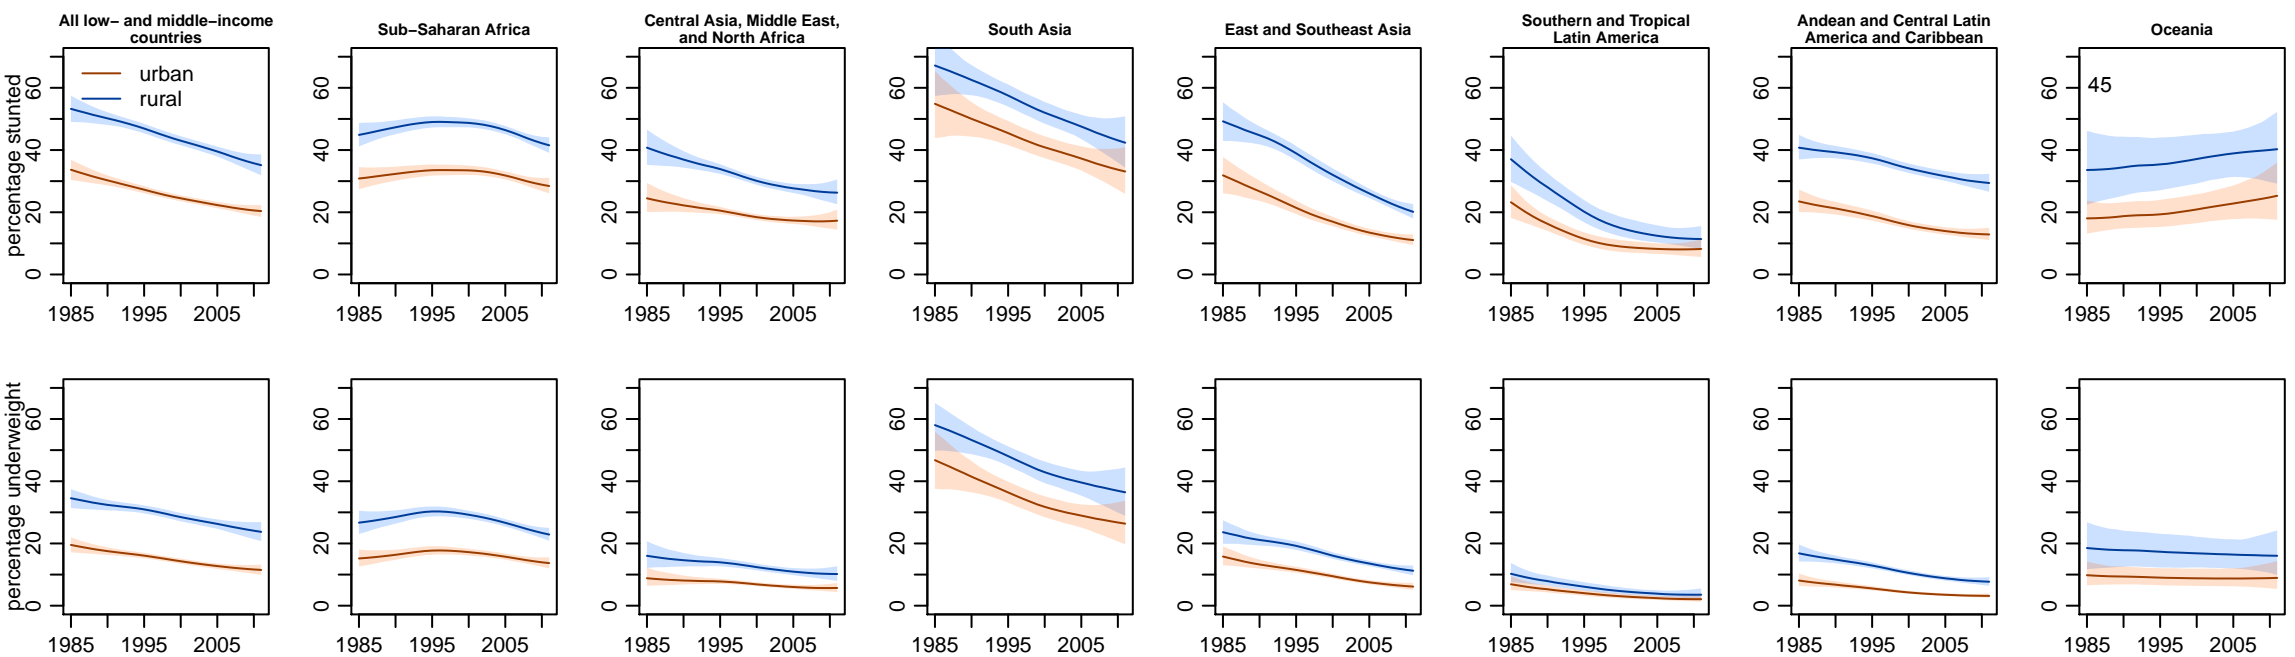

**Appendix Figure 3.** Trends in rural and urban mean HAZ and WAZ and prevalences of stunting and underweight by country. Shaded areas show the 95% uncertainty interval of the trend. The points show original data, with the legend for symbols and colours shown on the first page.

Note: Some data sources did not report standard deviation or standard error. For these data sources, the figure shows confidence intervals calculated using the estimated standard deviation (or variance) from the model fit.

- Nationally representative
- ▲ Regional or first administrative unit
  
- Rural
- Urban
- Mixed Rural/Urban
  
- Covers defined age range
- Does not cover defined age range
  
- Uncertainty based on modelled variance
- \* Beyond the y-axis limits



# Afghanistan

## South Asia Region

### HAZ

### WAZ

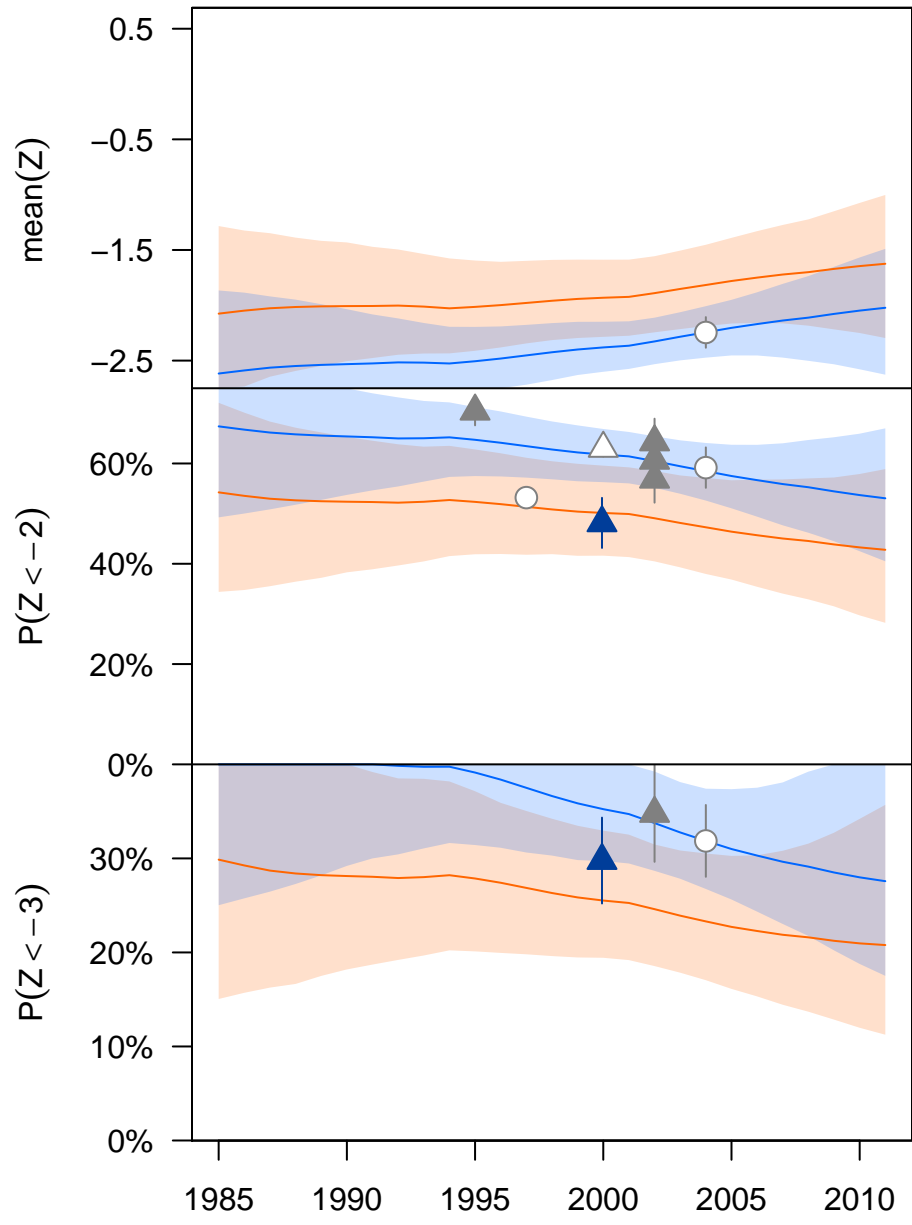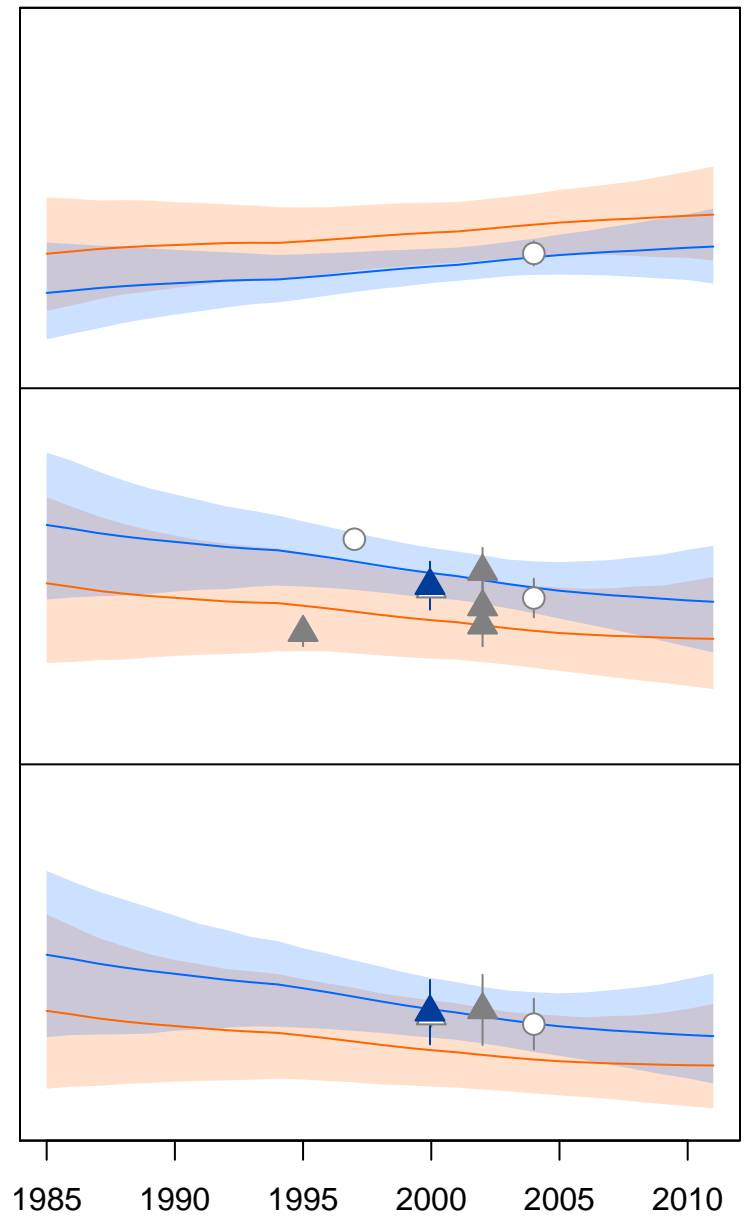

# Algeria

## Central Asia, Middle East, and North Africa Region

### HAZ

### WAZ

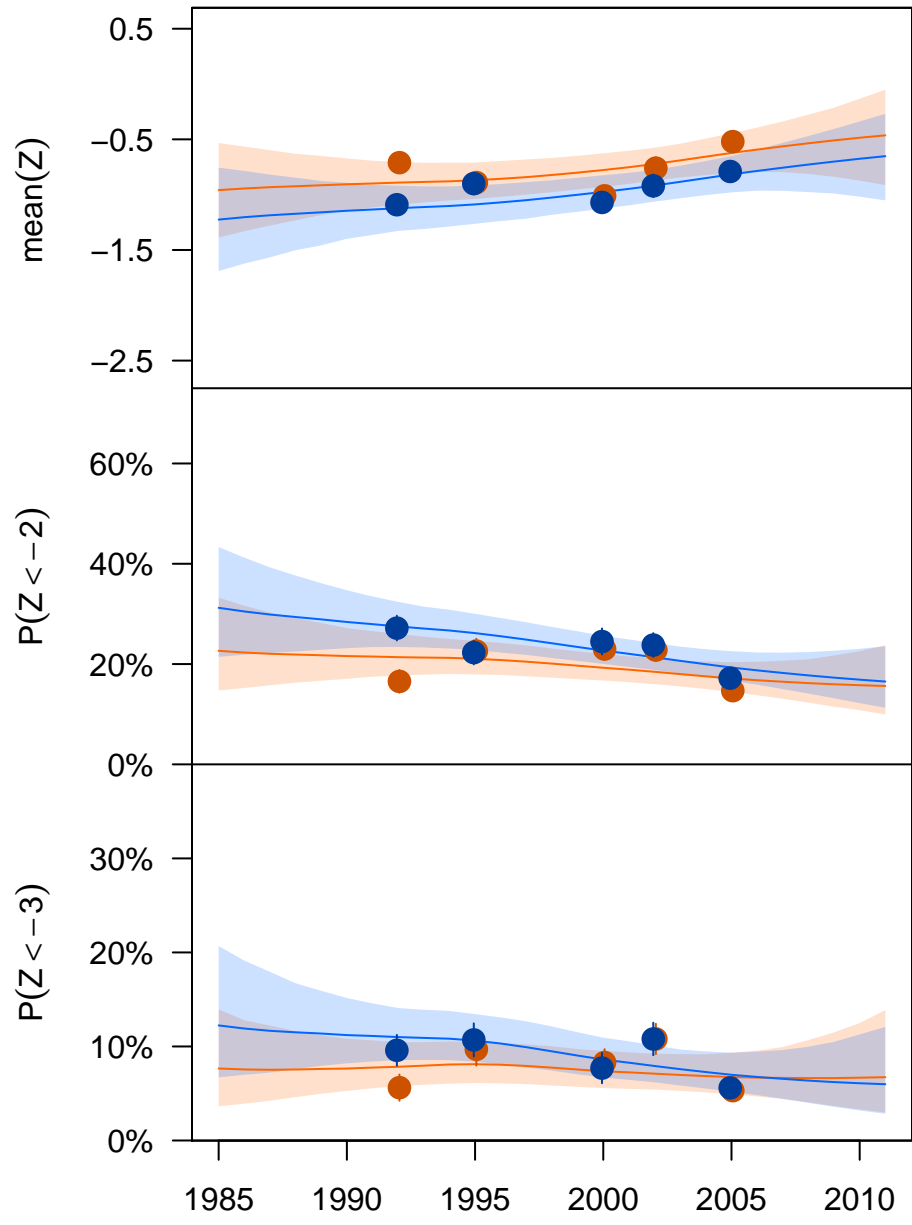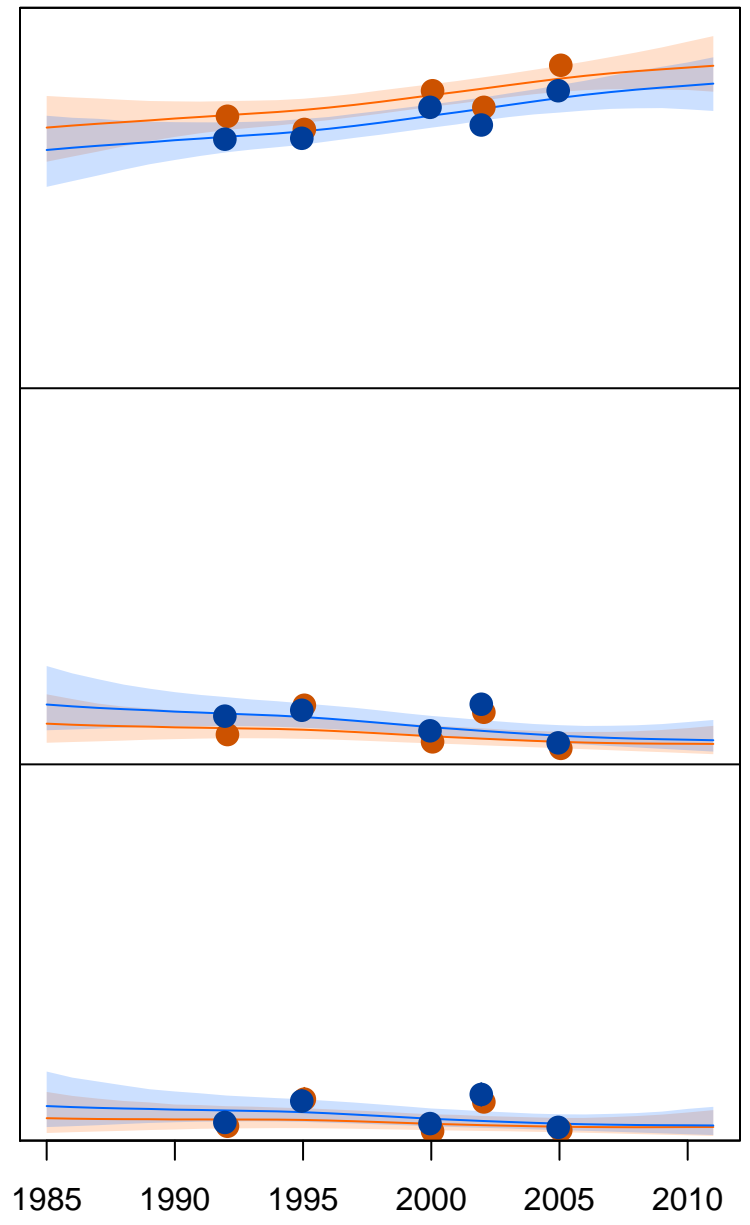

# Angola

## Sub-Saharan Africa Region

### HAZ

### WAZ

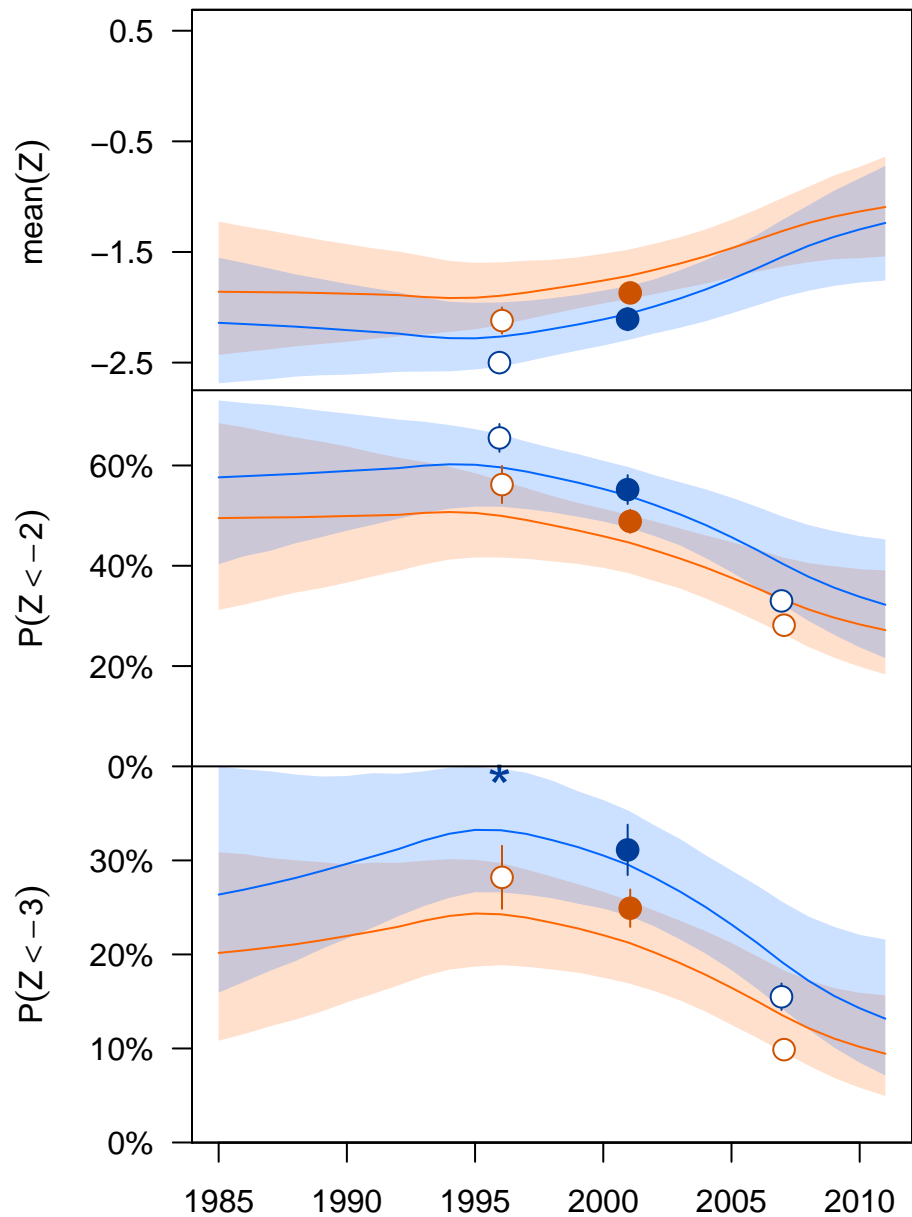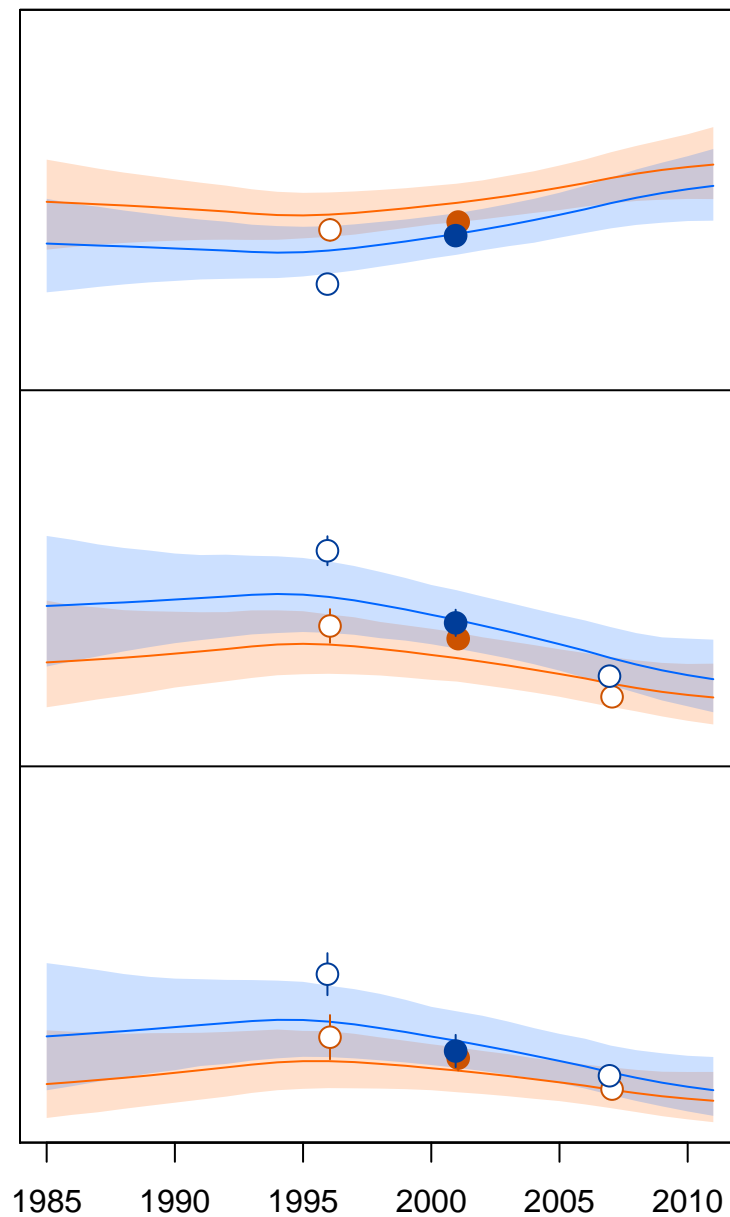

# Antigua and Barbuda

Andean and Central Latin America and Caribbean Region

### HAZ

### WAZ

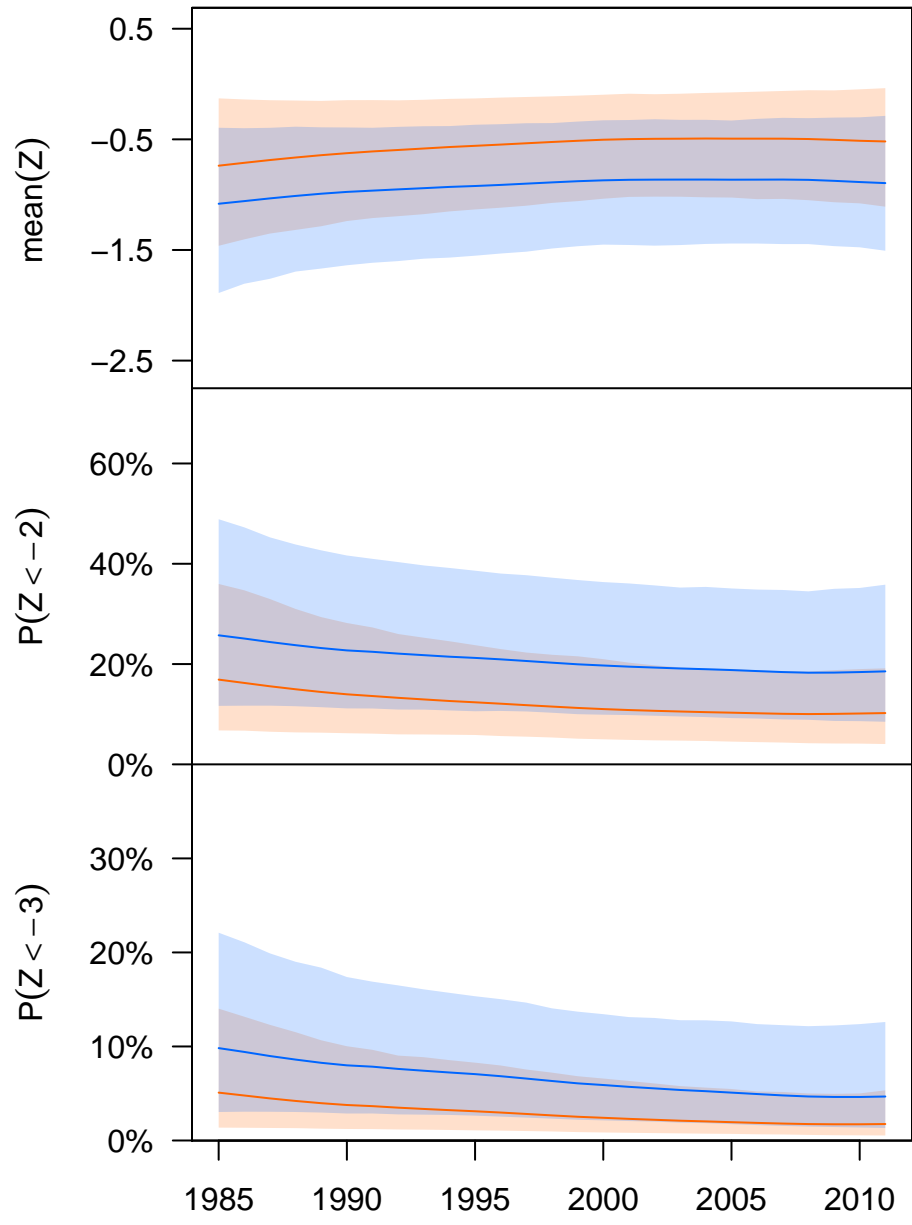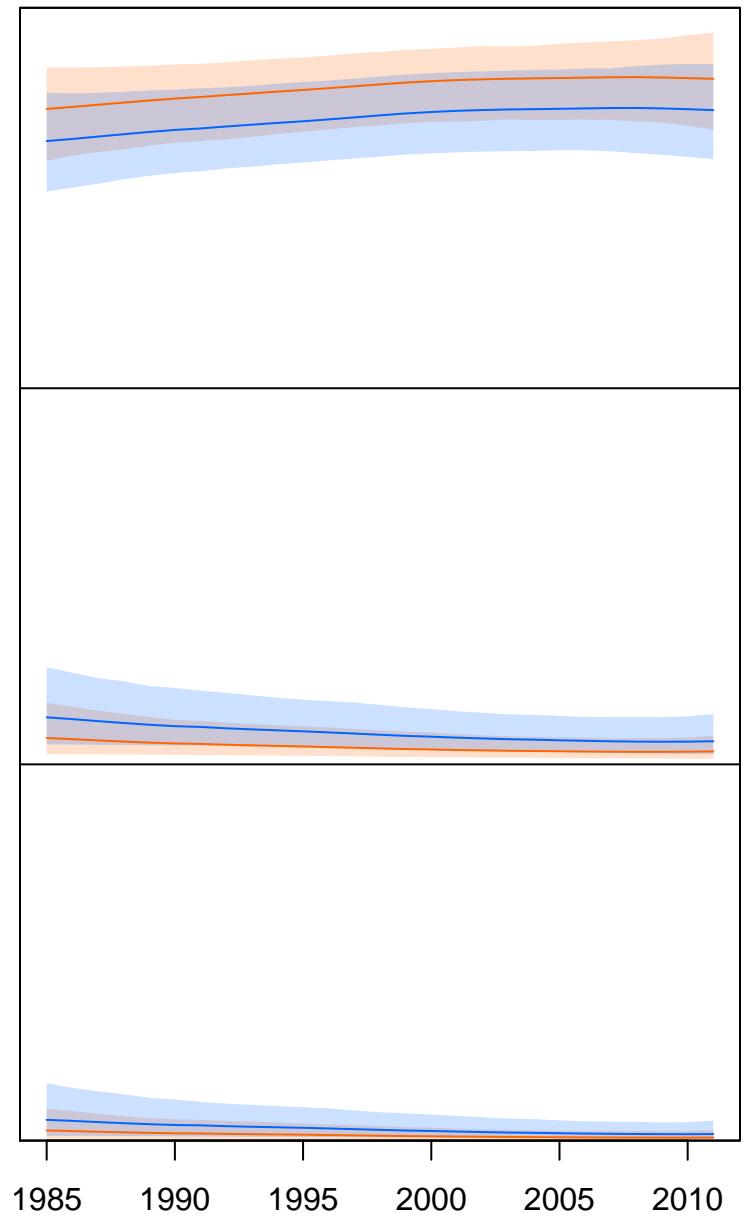

# Argentina

## Southern and Tropical Latin America Region

### HAZ

### WAZ

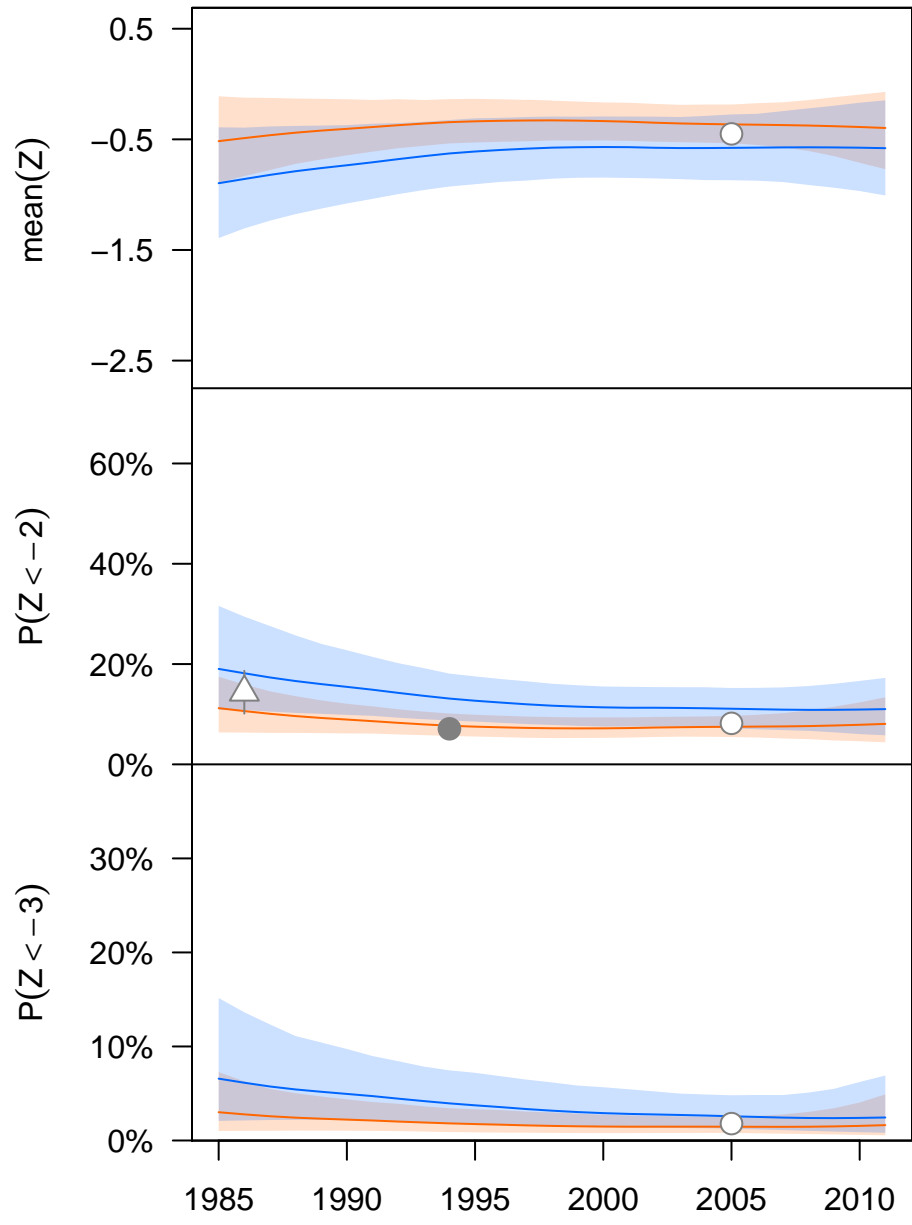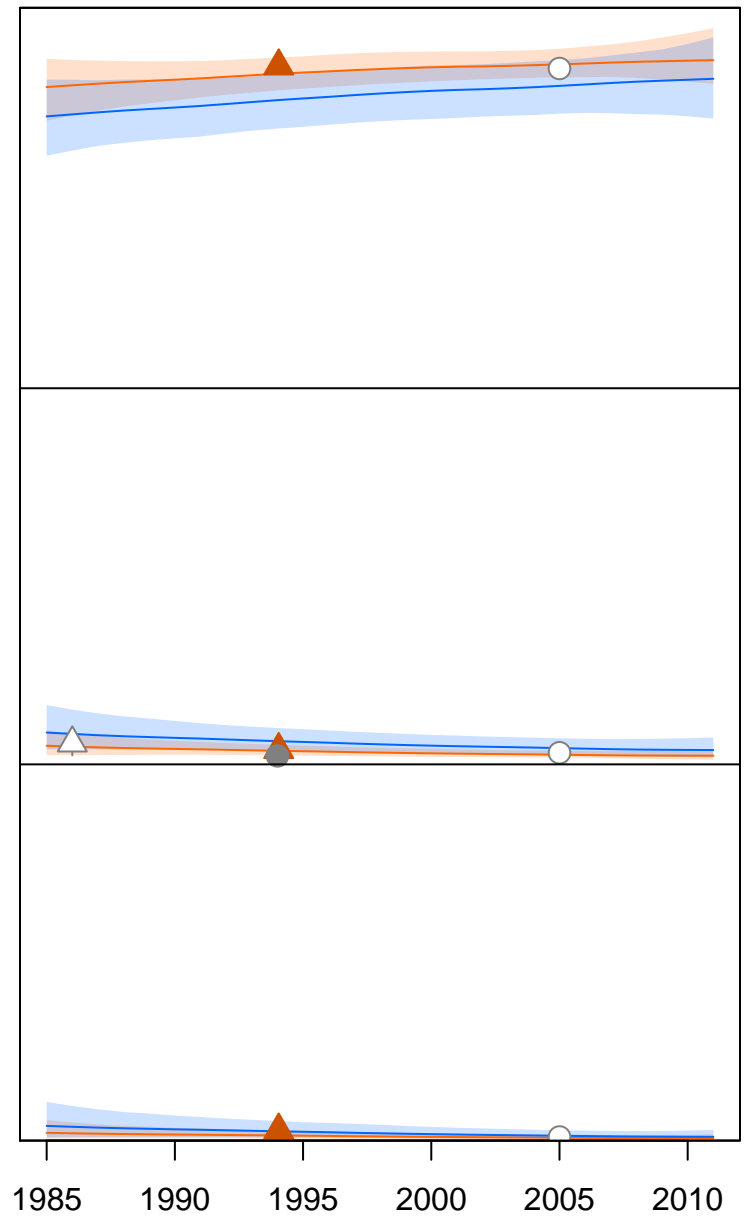

# Armenia

## Central Asia, Middle East, and North Africa Region

### HAZ

### WAZ

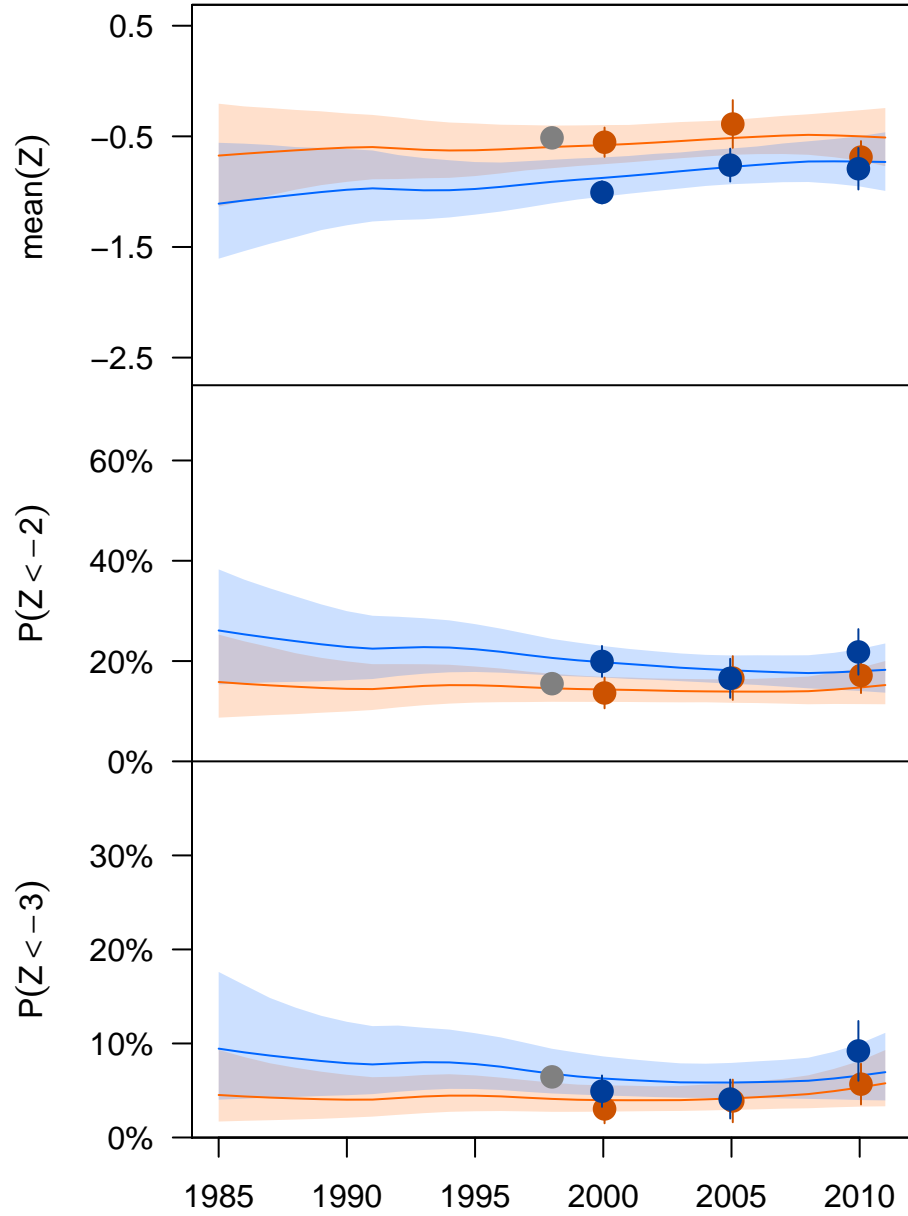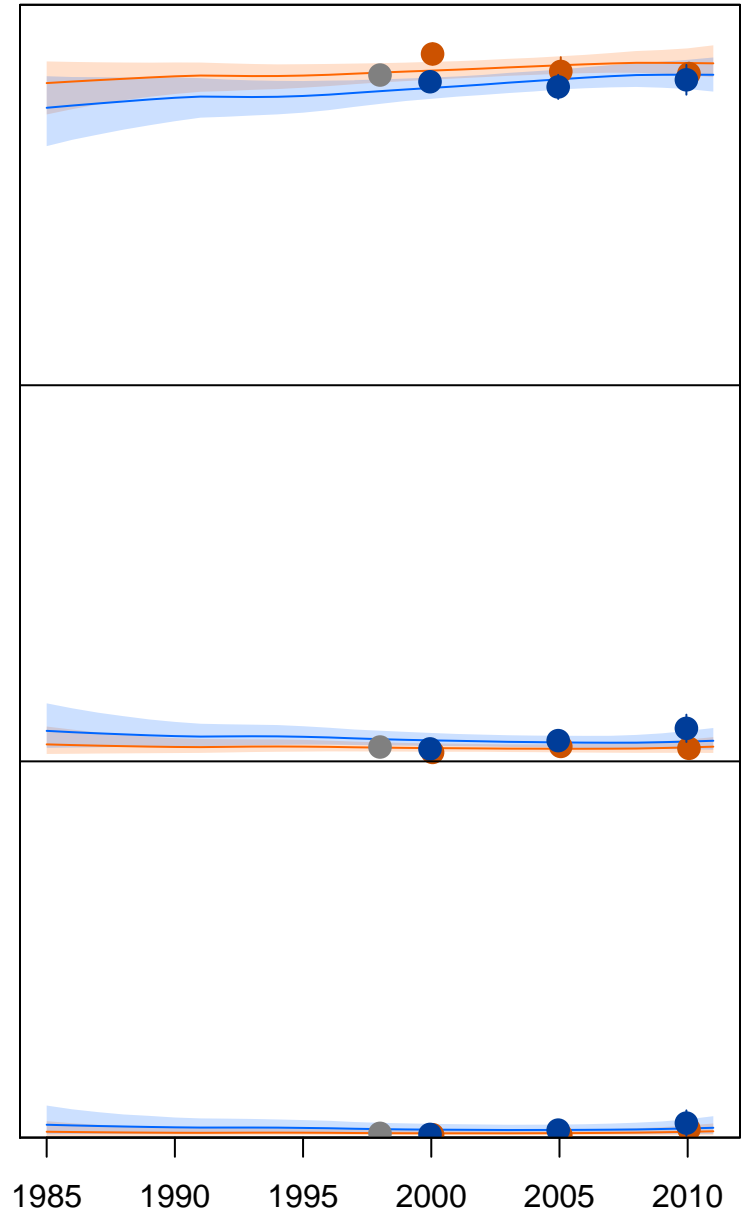

# Azerbaijan

## Central Asia, Middle East, and North Africa Region

### HAZ

### WAZ

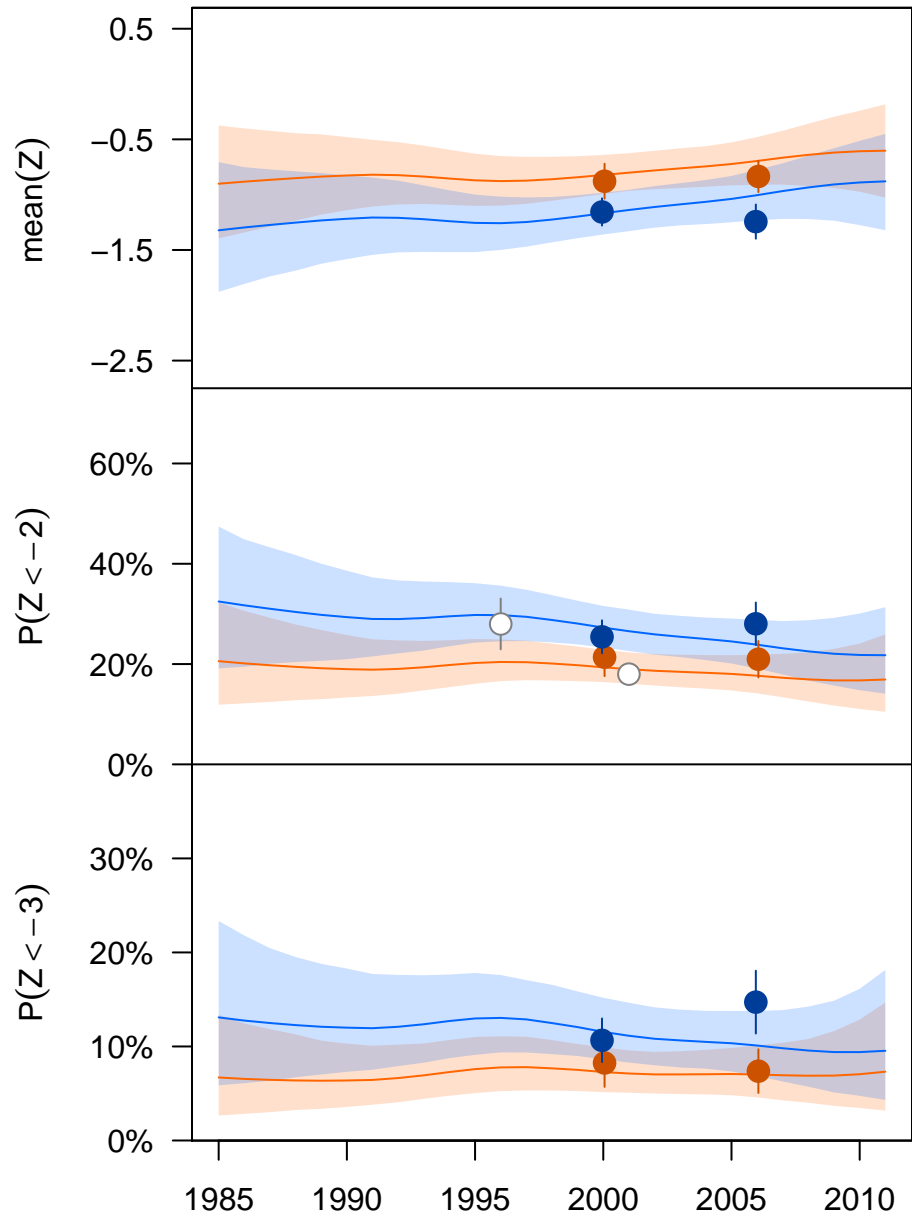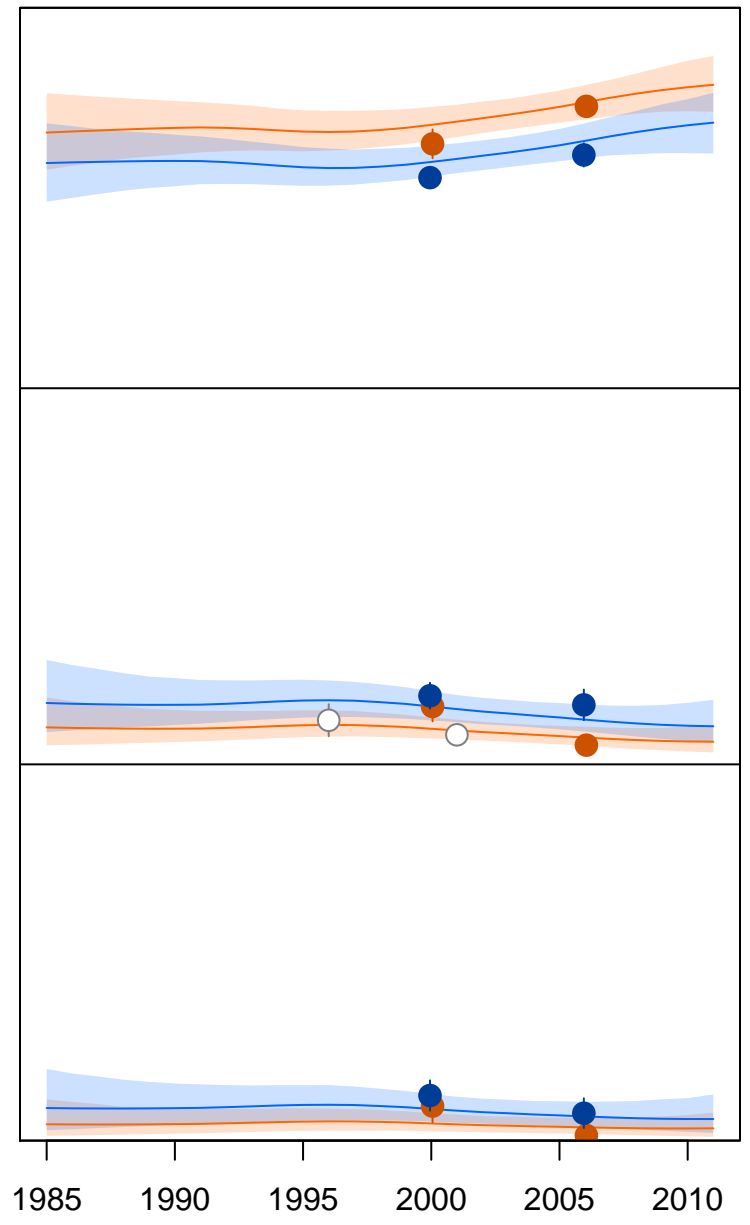

# Bahamas

Andean and Central Latin America and Caribbean Region

55

## HAZ

## WAZ

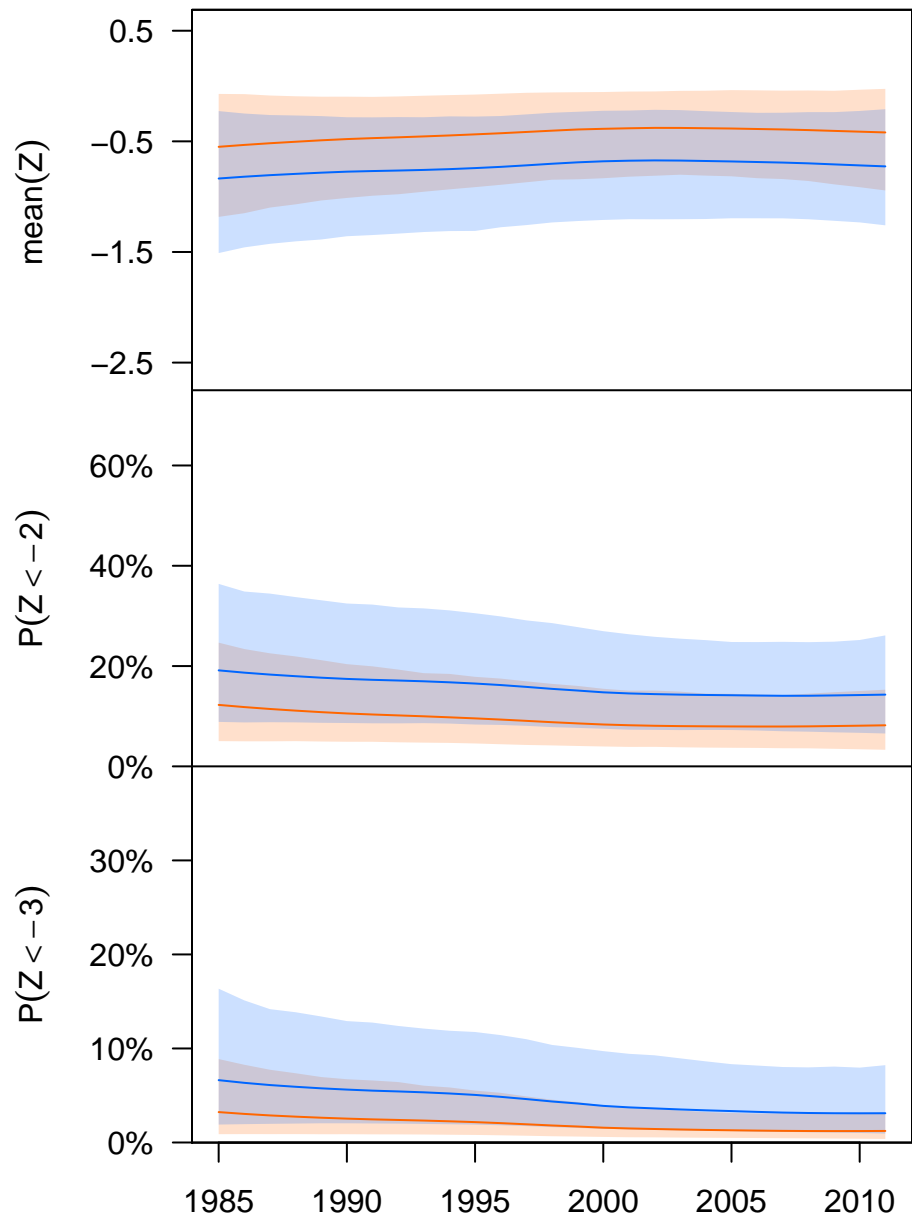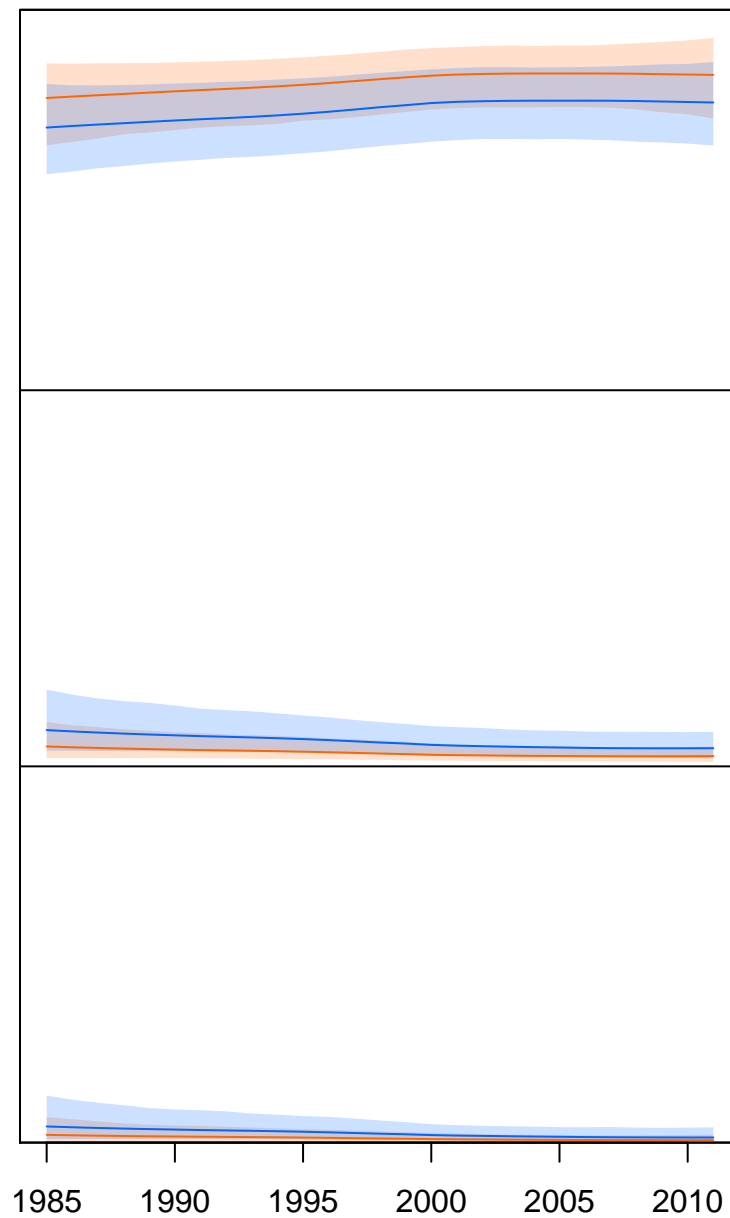



# Bahrain

Central Asia, Middle East, and North Africa Region

### HAZ

### WAZ

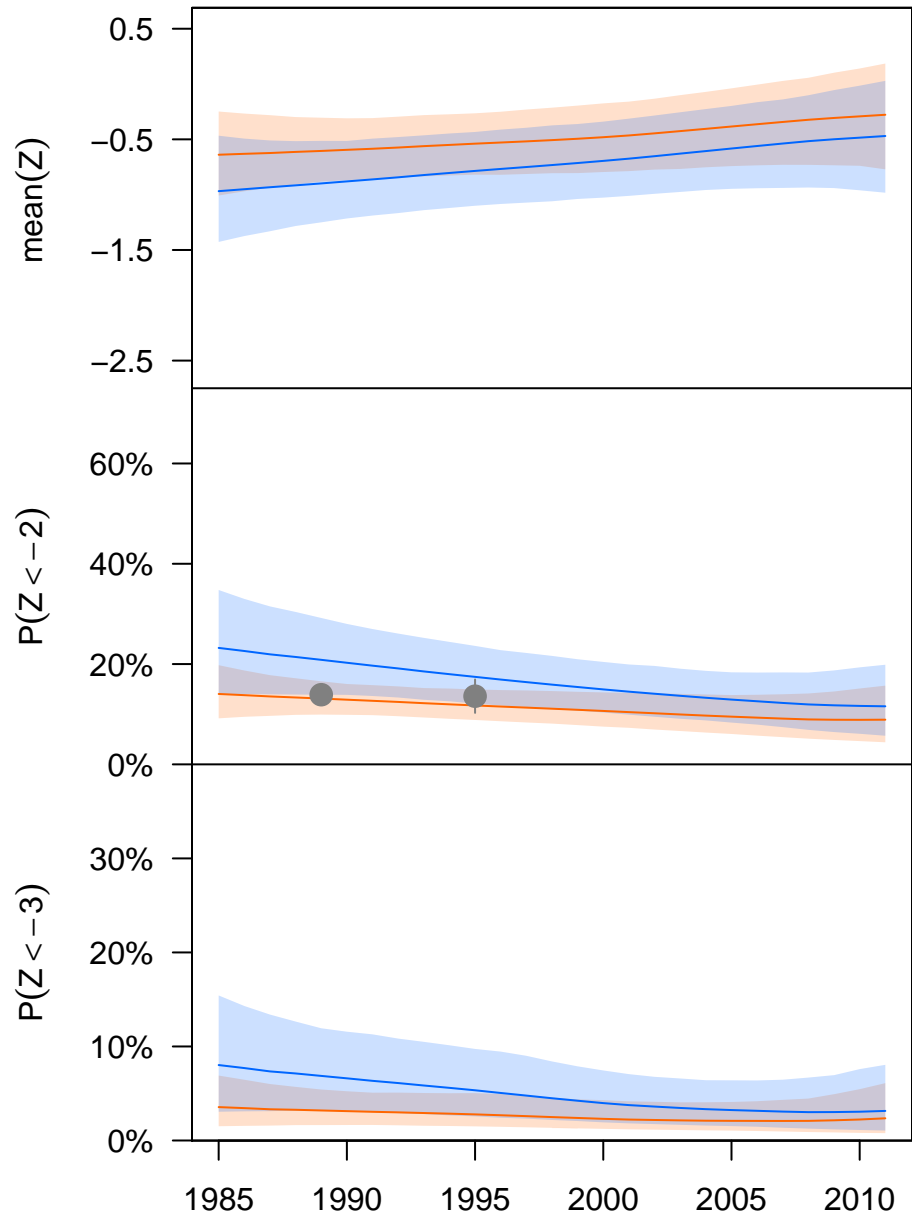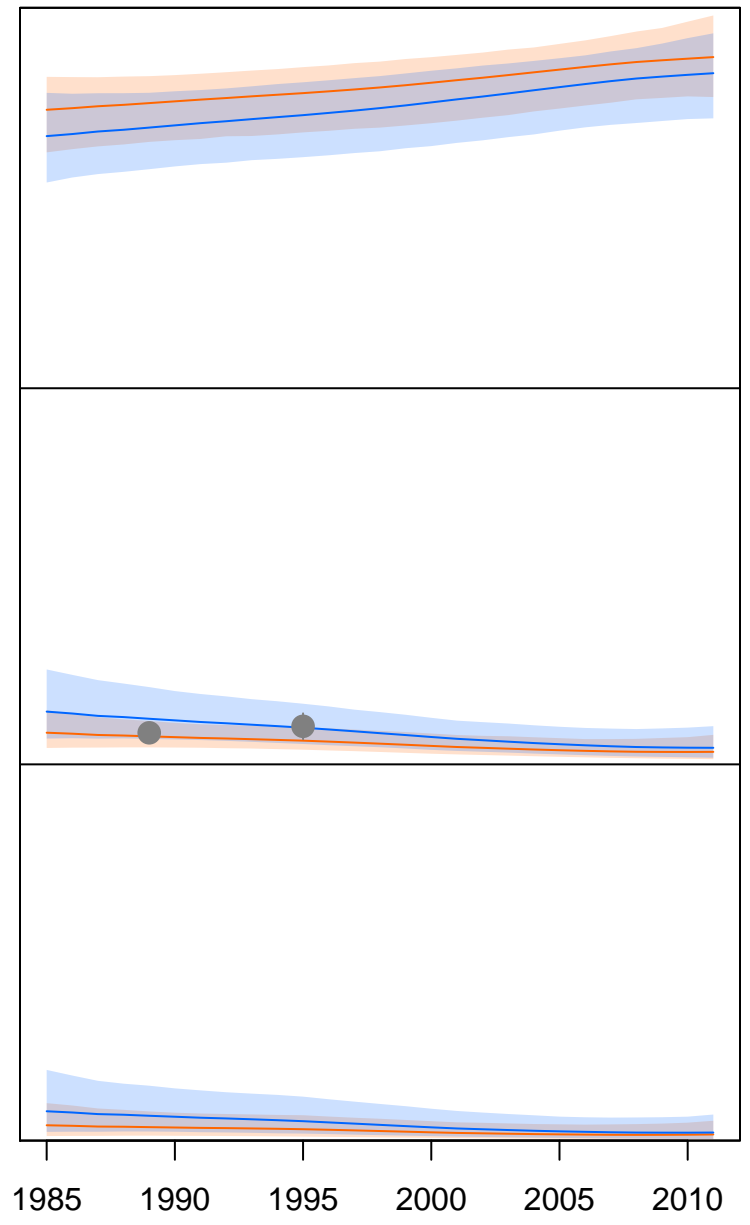

**Bangladesh**  
**South Asia Region**

**HAZ**

**WAZ**

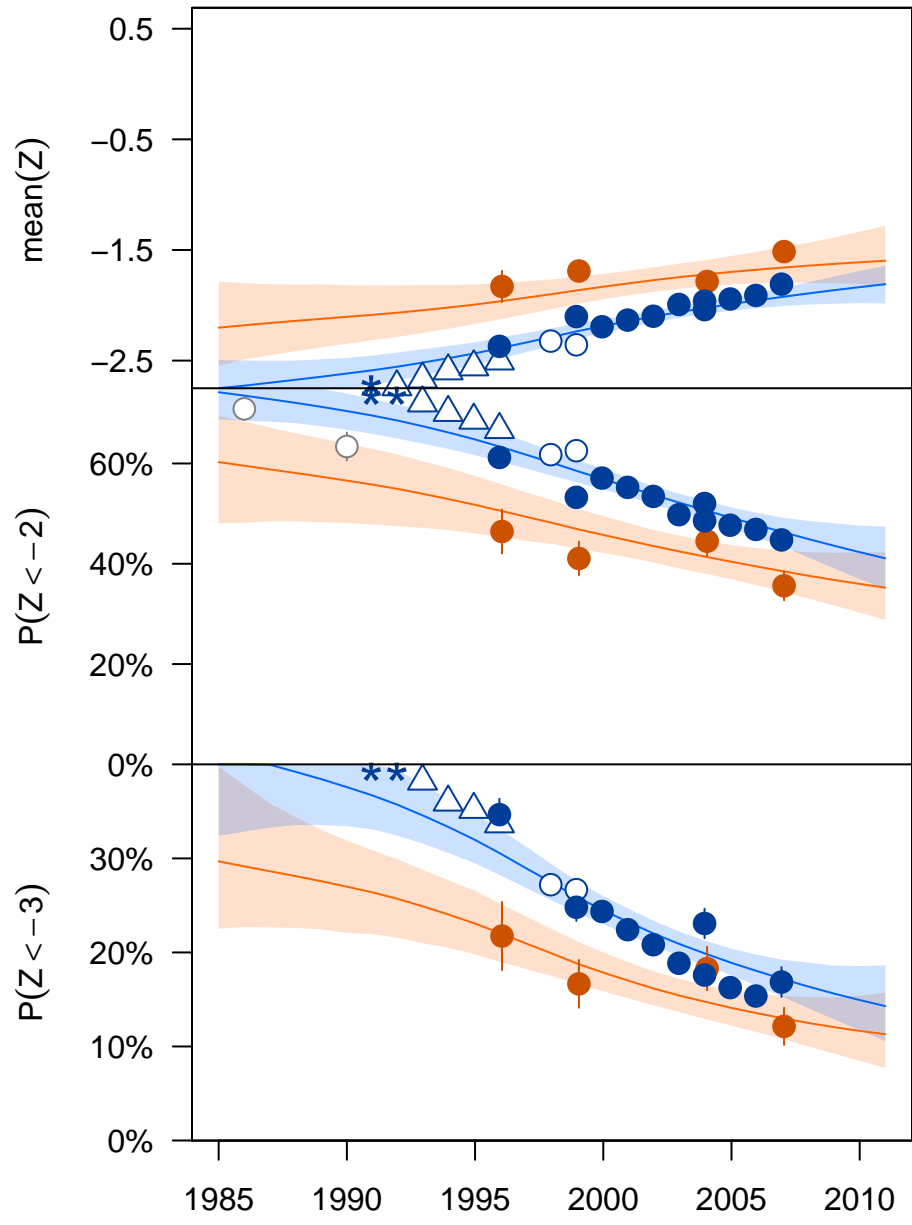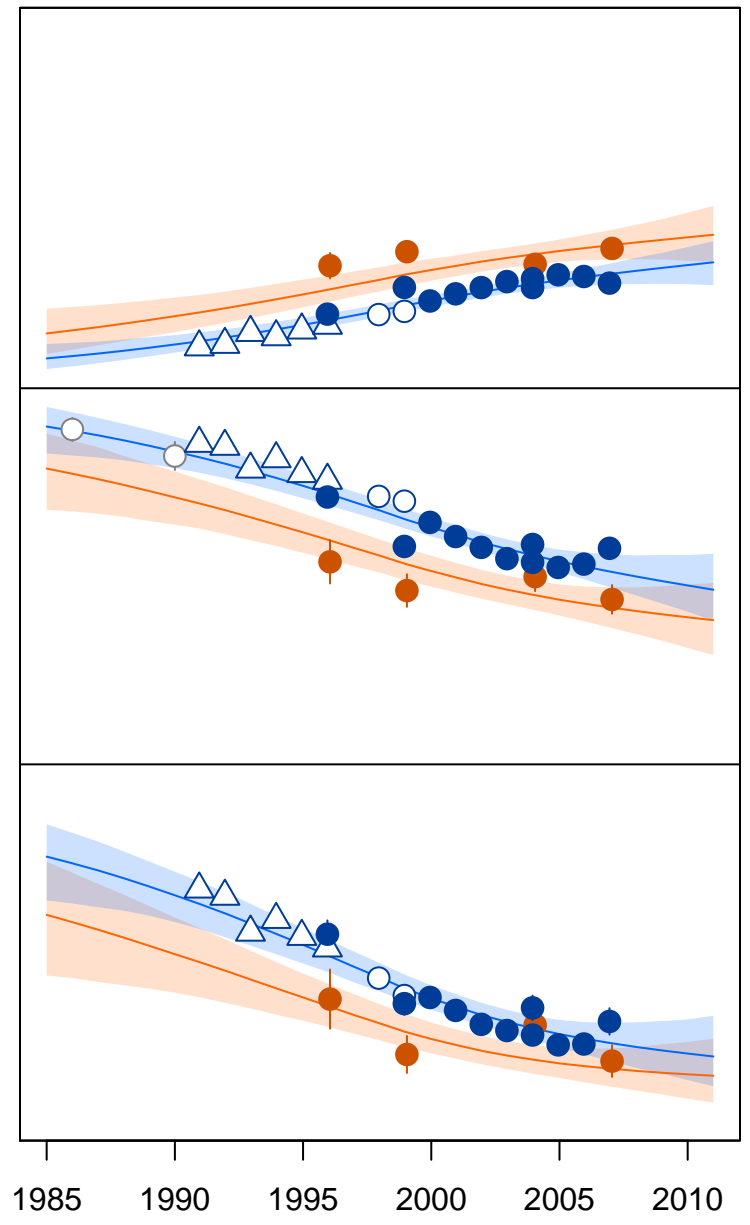

# Barbados

Andean and Central Latin America and Caribbean Region

58

## HAZ

## WAZ

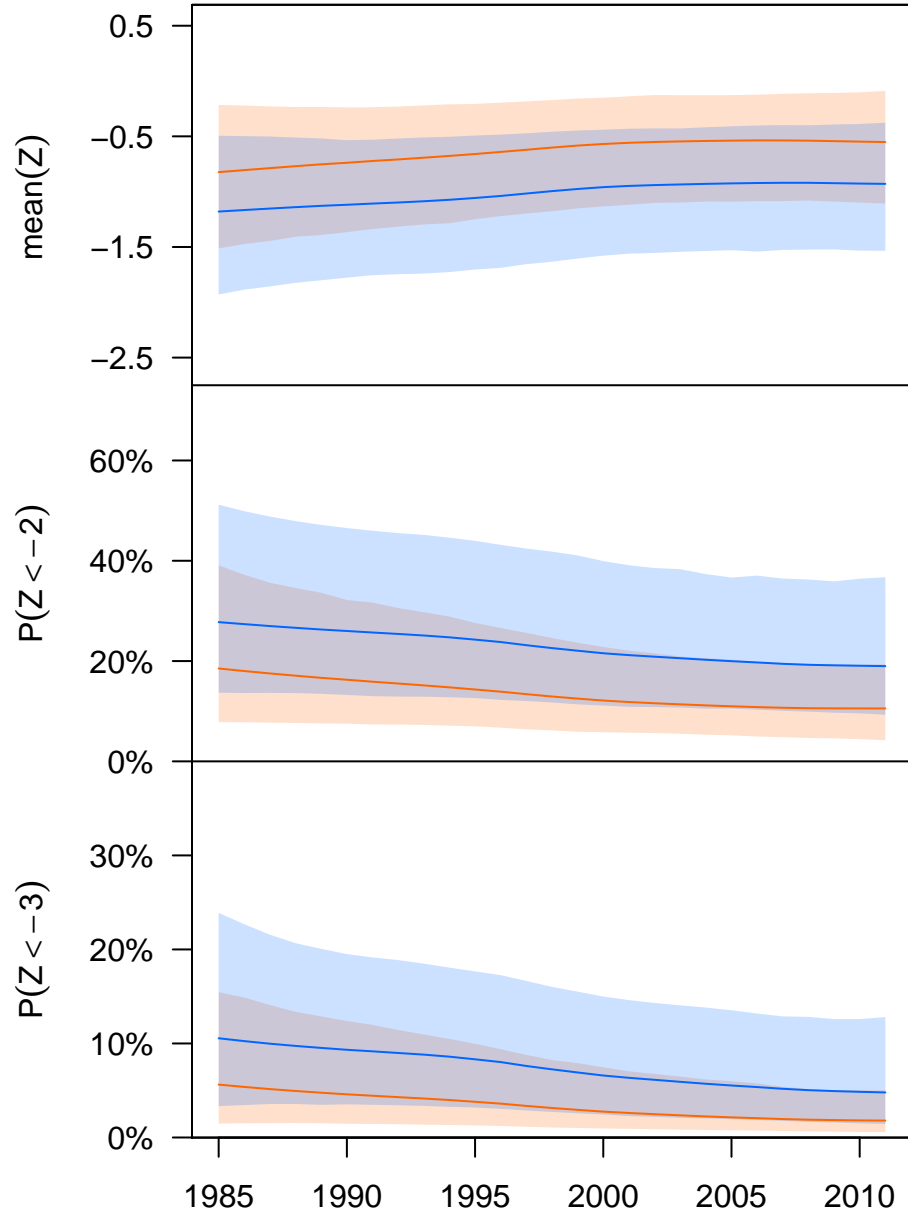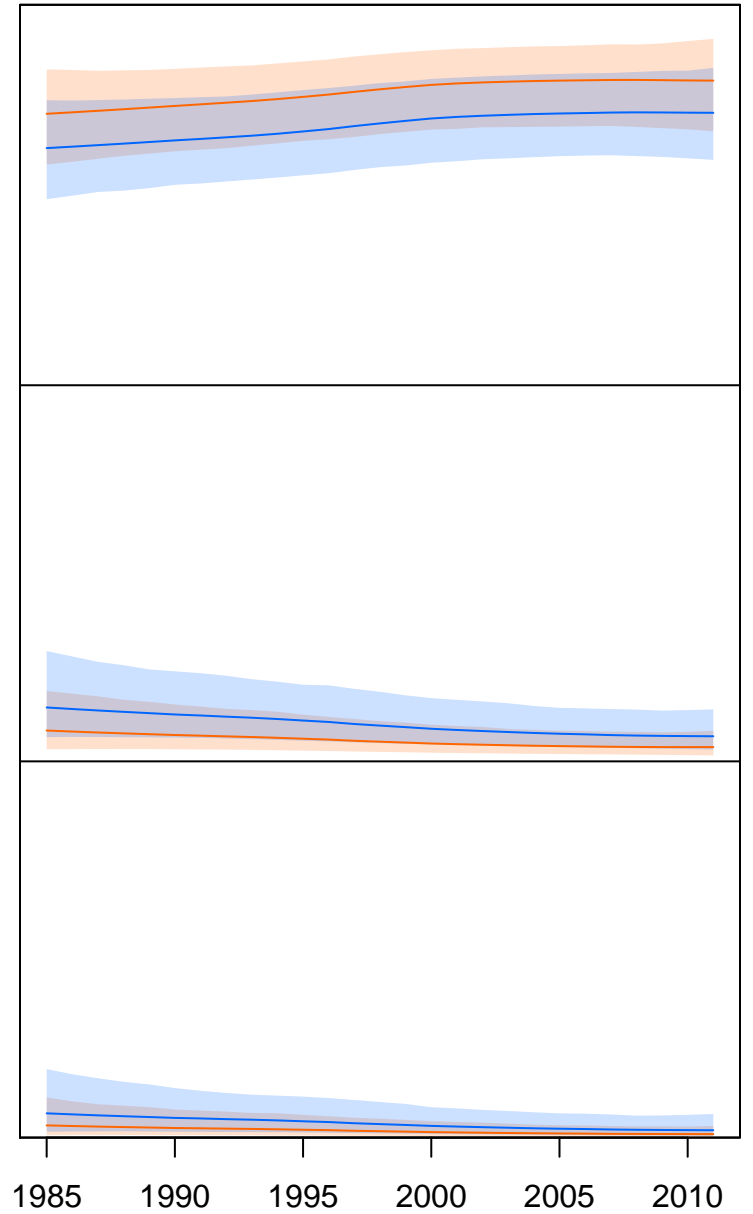

# Belize

Andean and Central Latin America and Caribbean Region

59

## HAZ

## WAZ

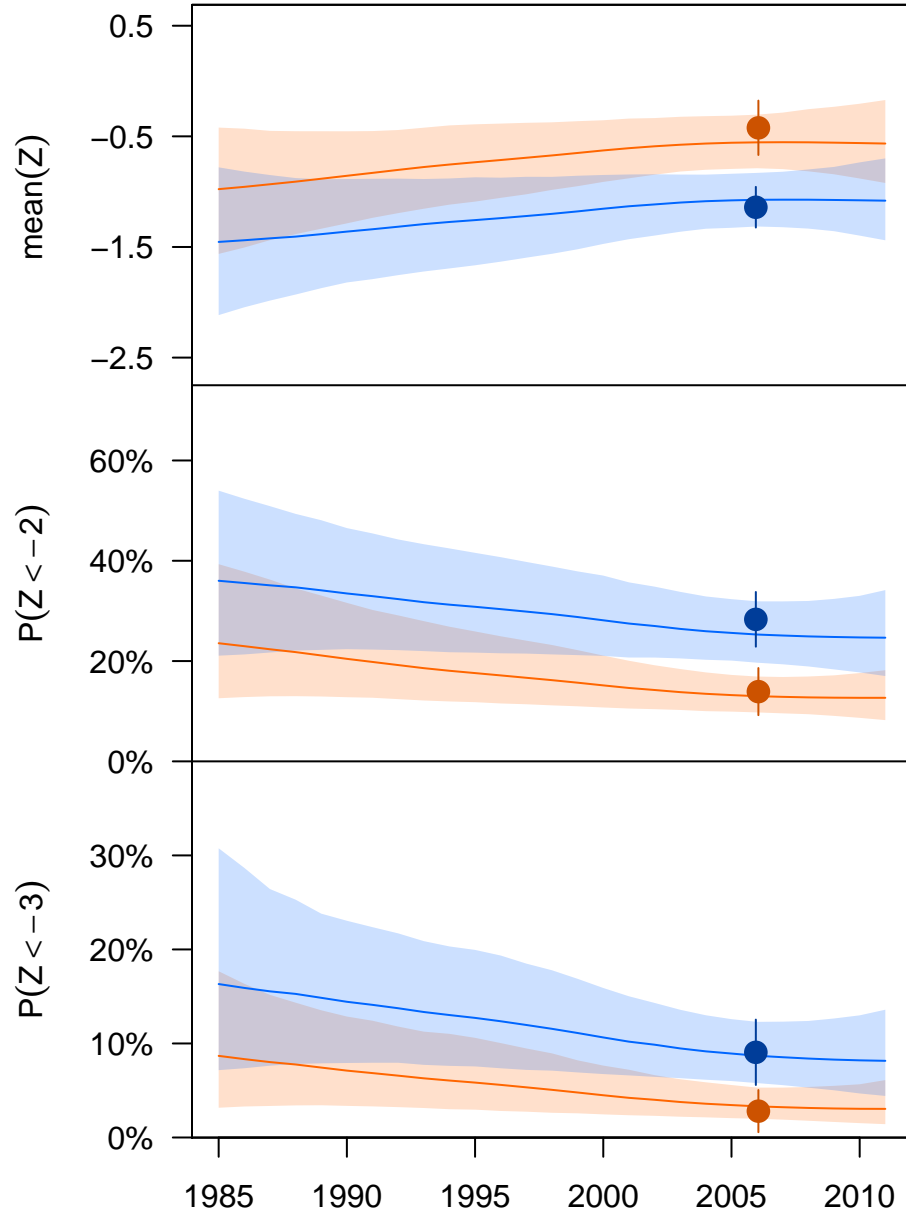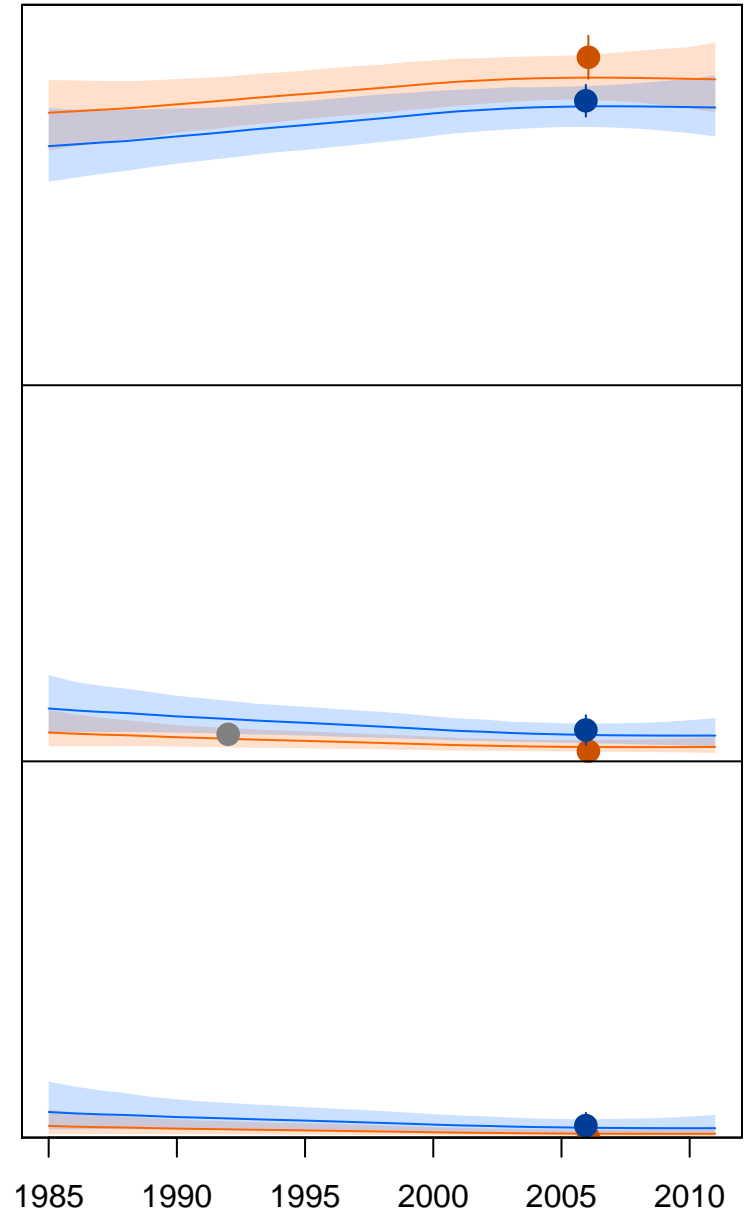

# Benin

## Sub-Saharan Africa Region

### HAZ

### WAZ

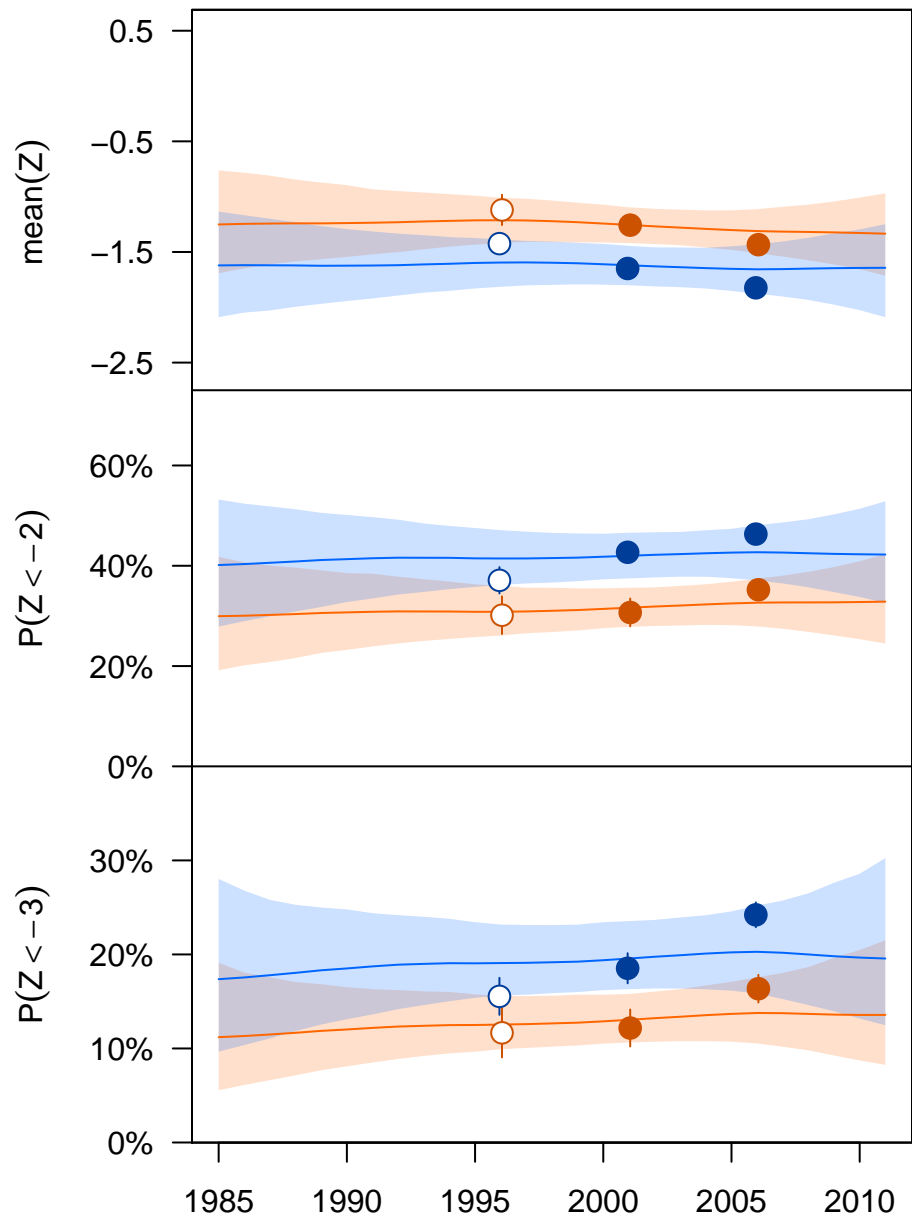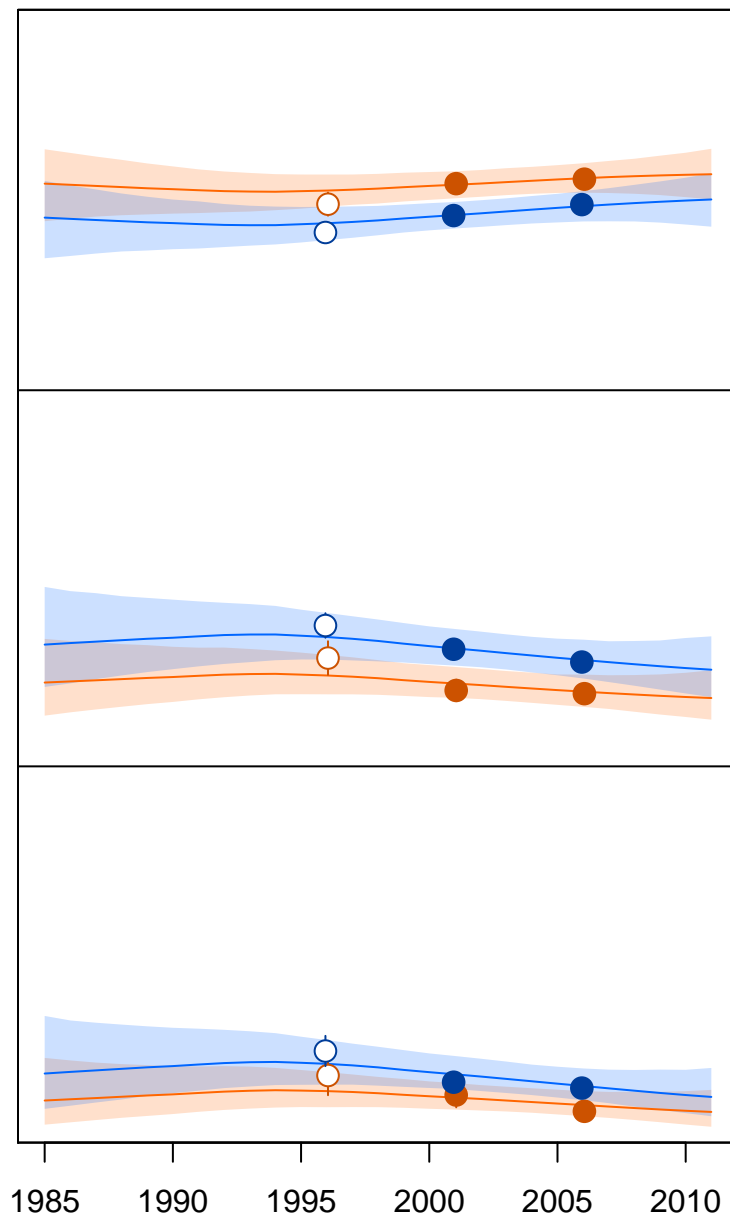

# Bermuda

Andean and Central Latin America and Caribbean Region

61

## HAZ

## WAZ

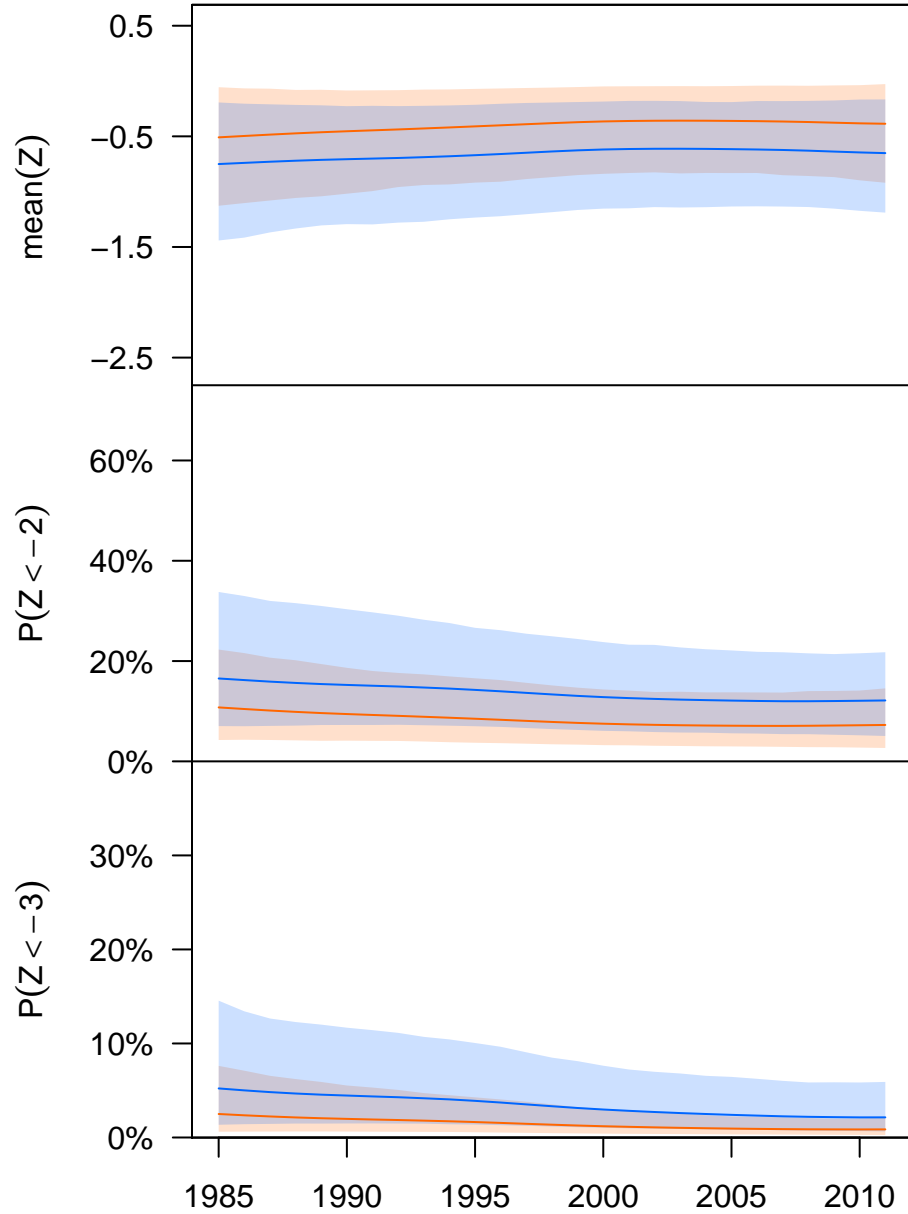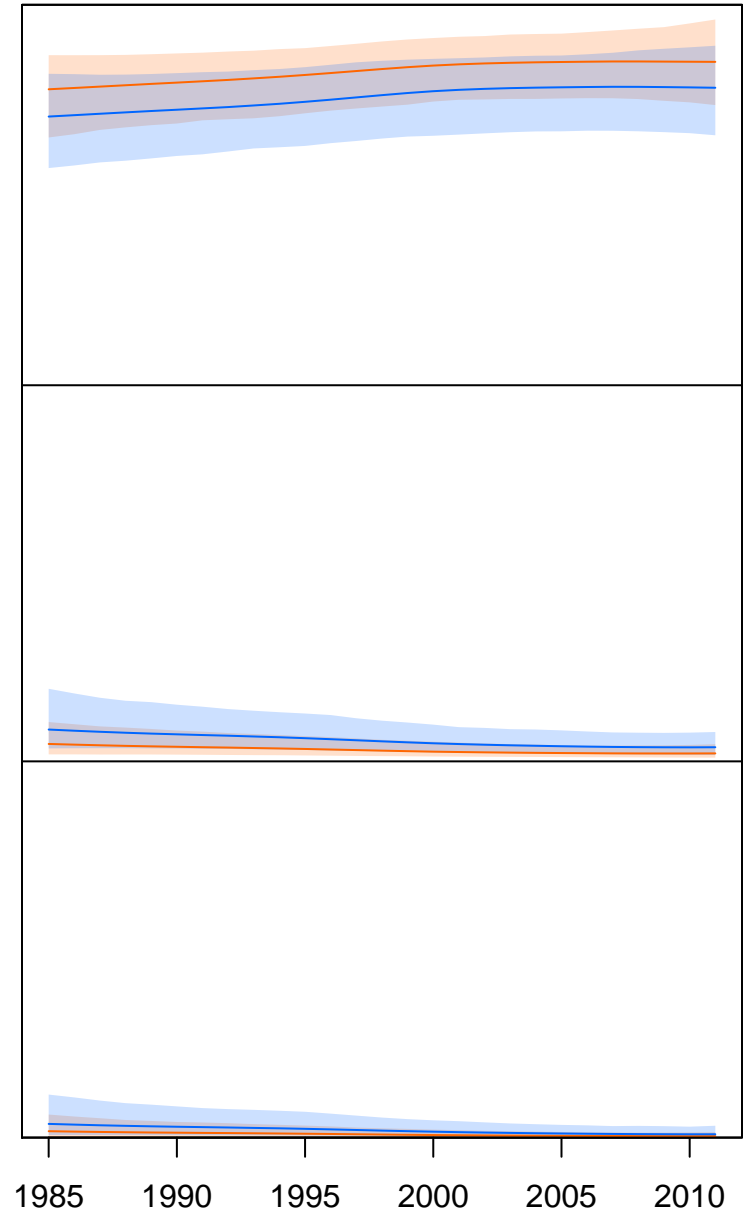

# Bhutan

South Asia Region

### HAZ

### WAZ

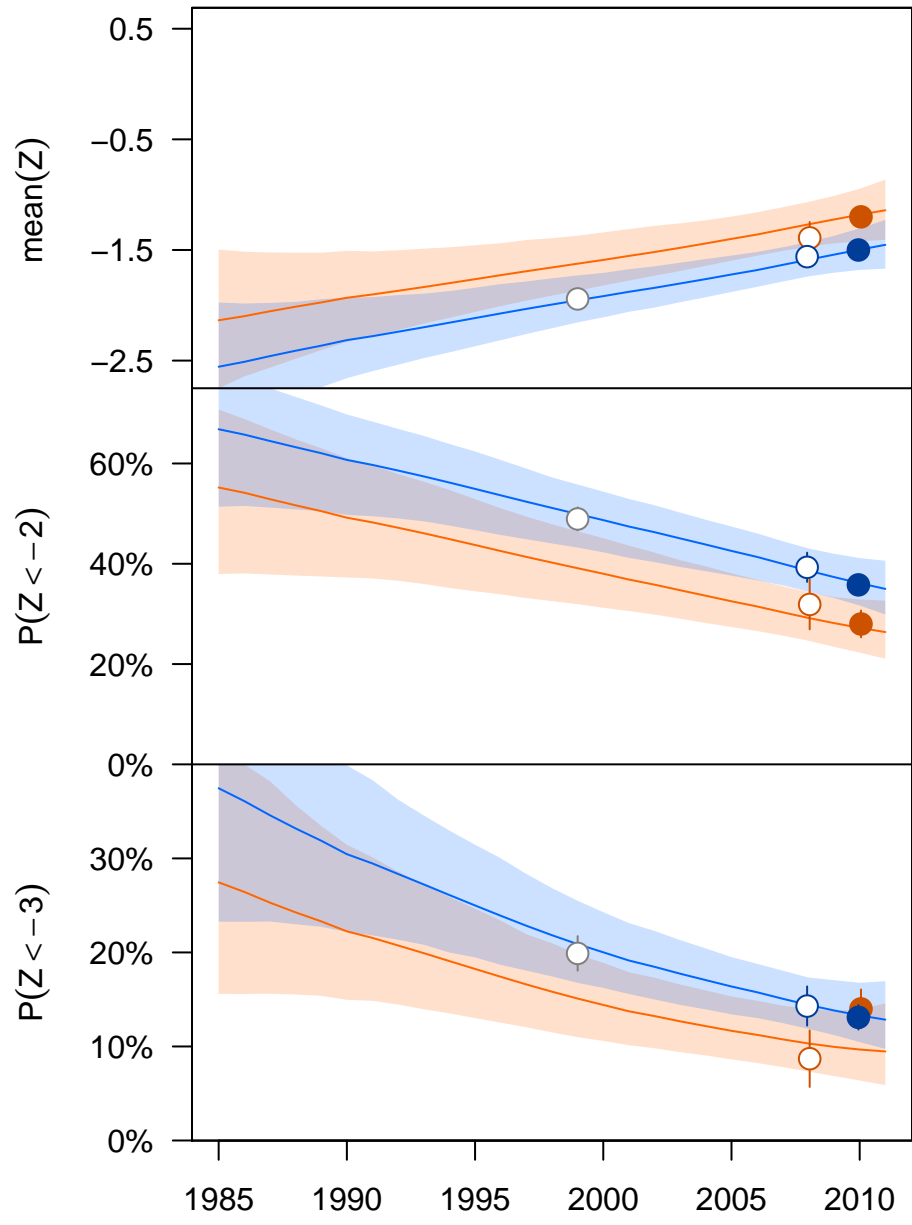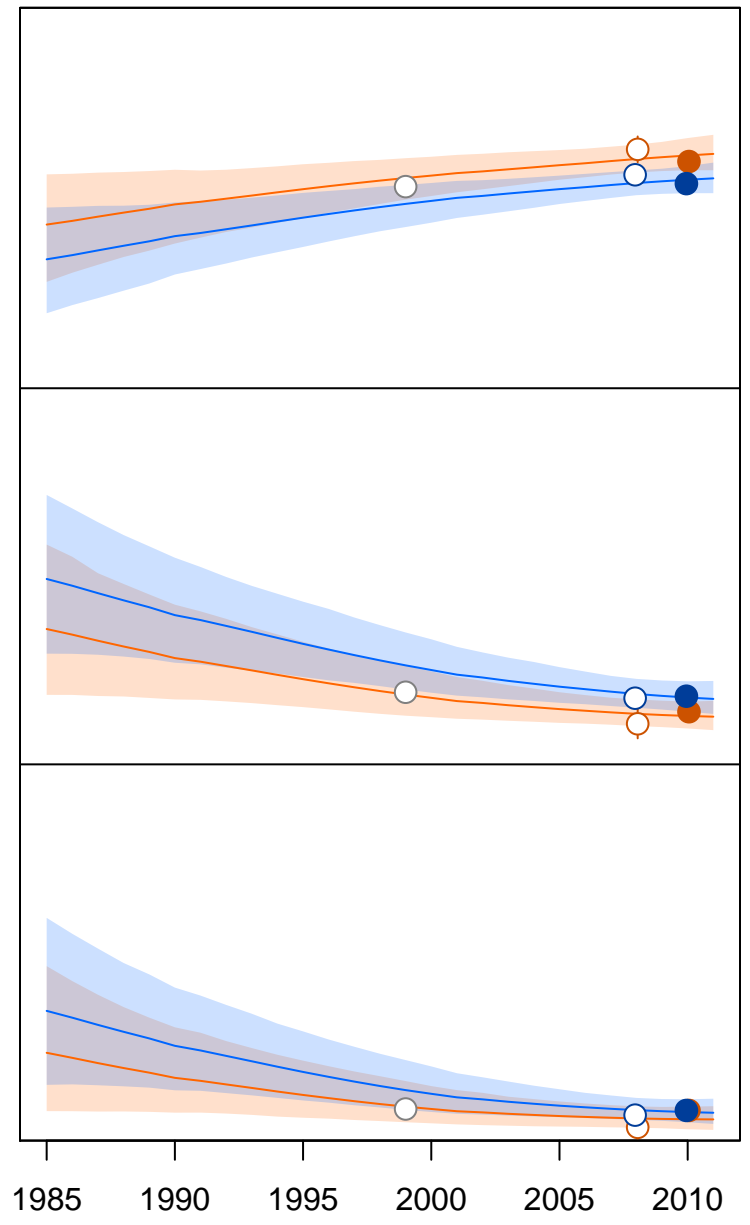

# Bolivia

Andean and Central Latin America and Caribbean Region

63

## HAZ

## WAZ

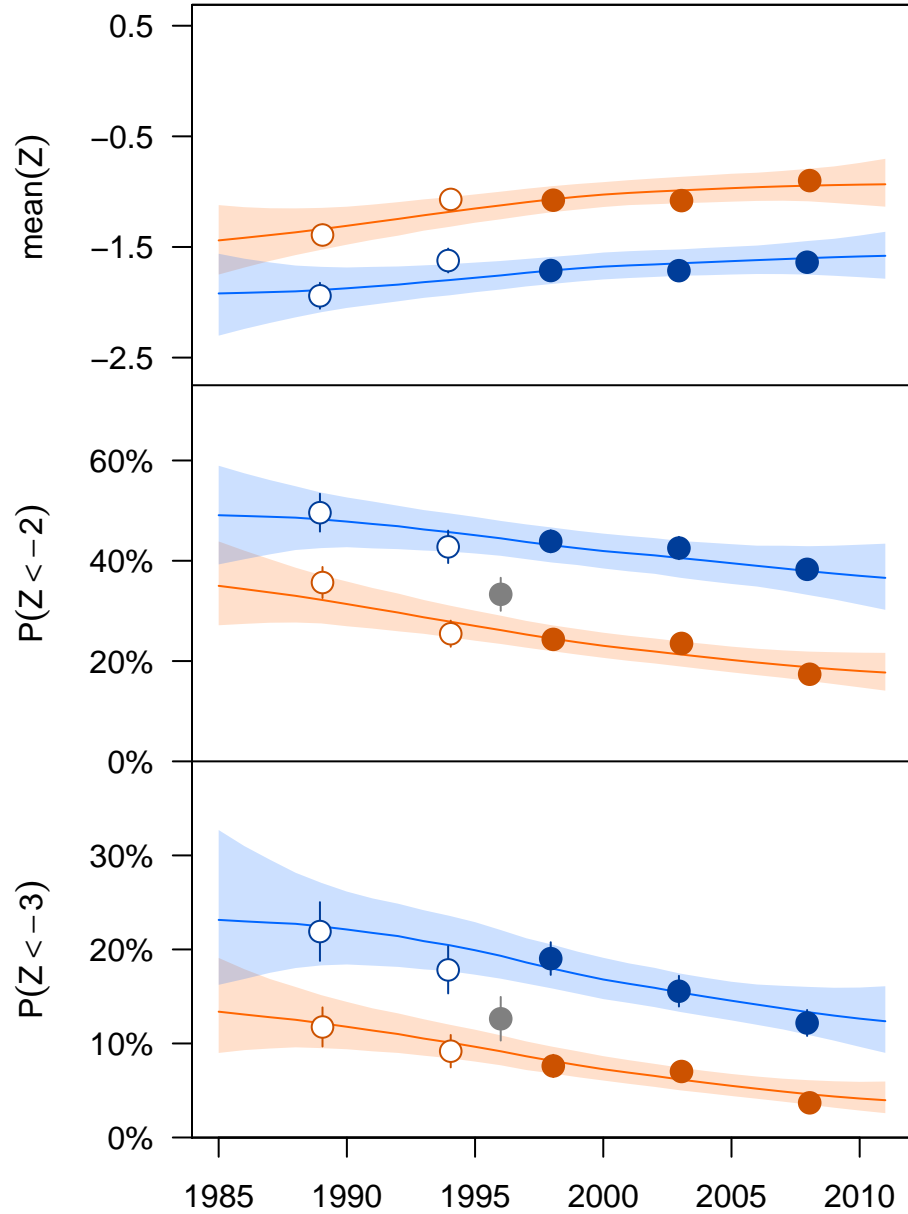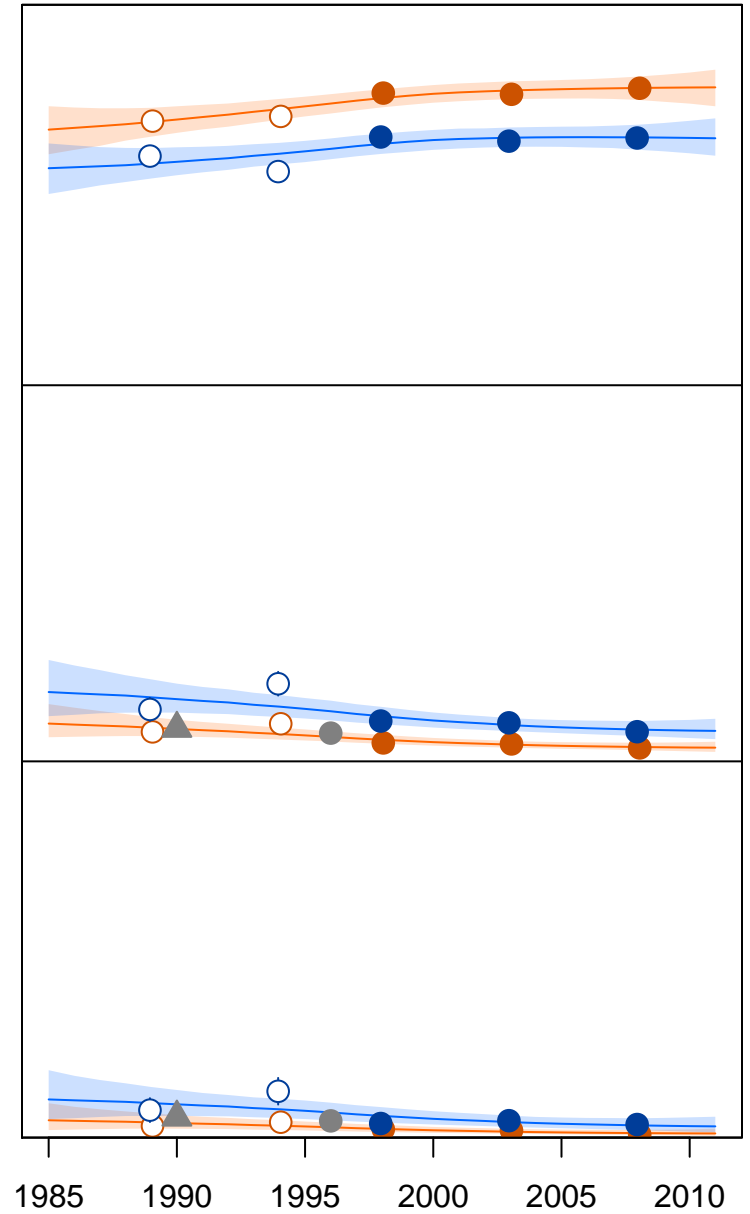



# Botswana

## Sub-Saharan Africa Region

### HAZ

### WAZ

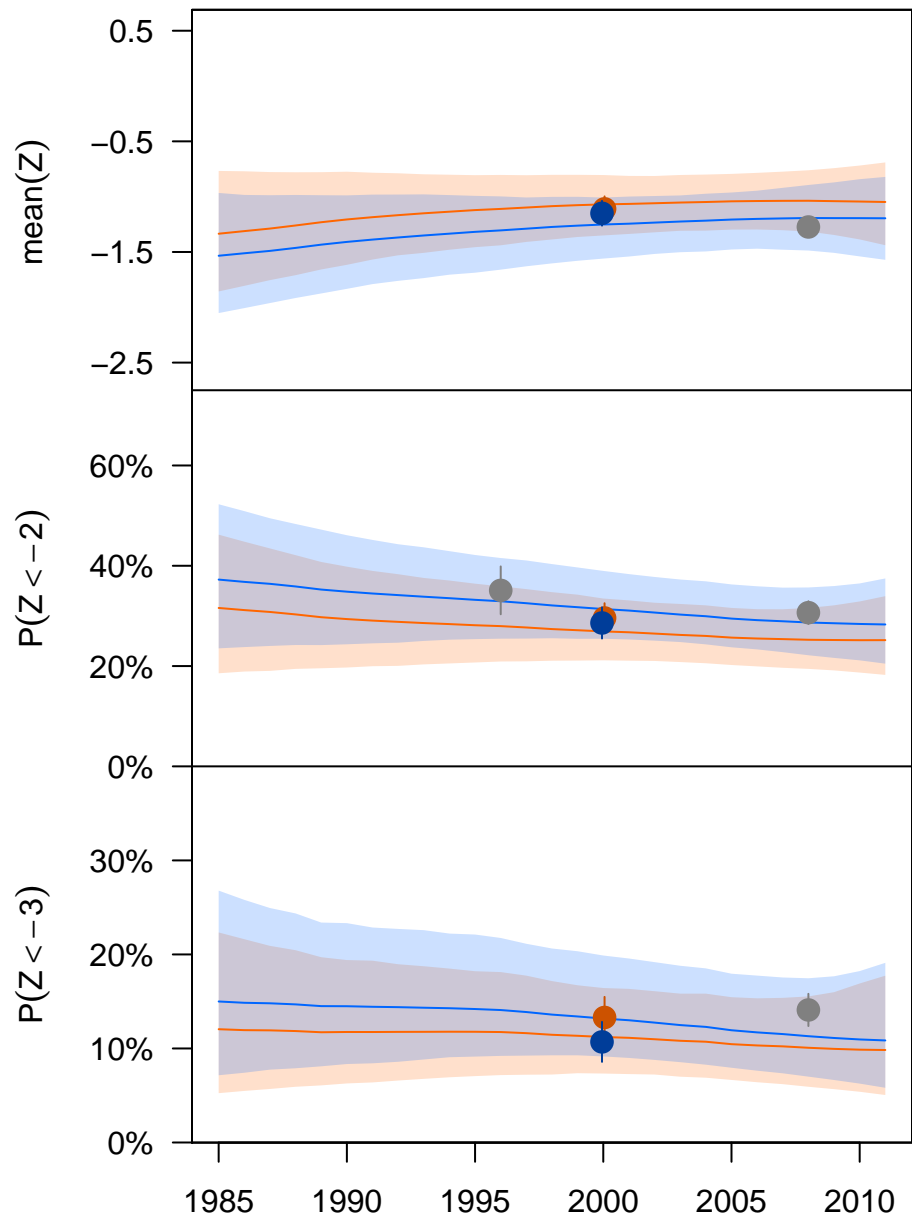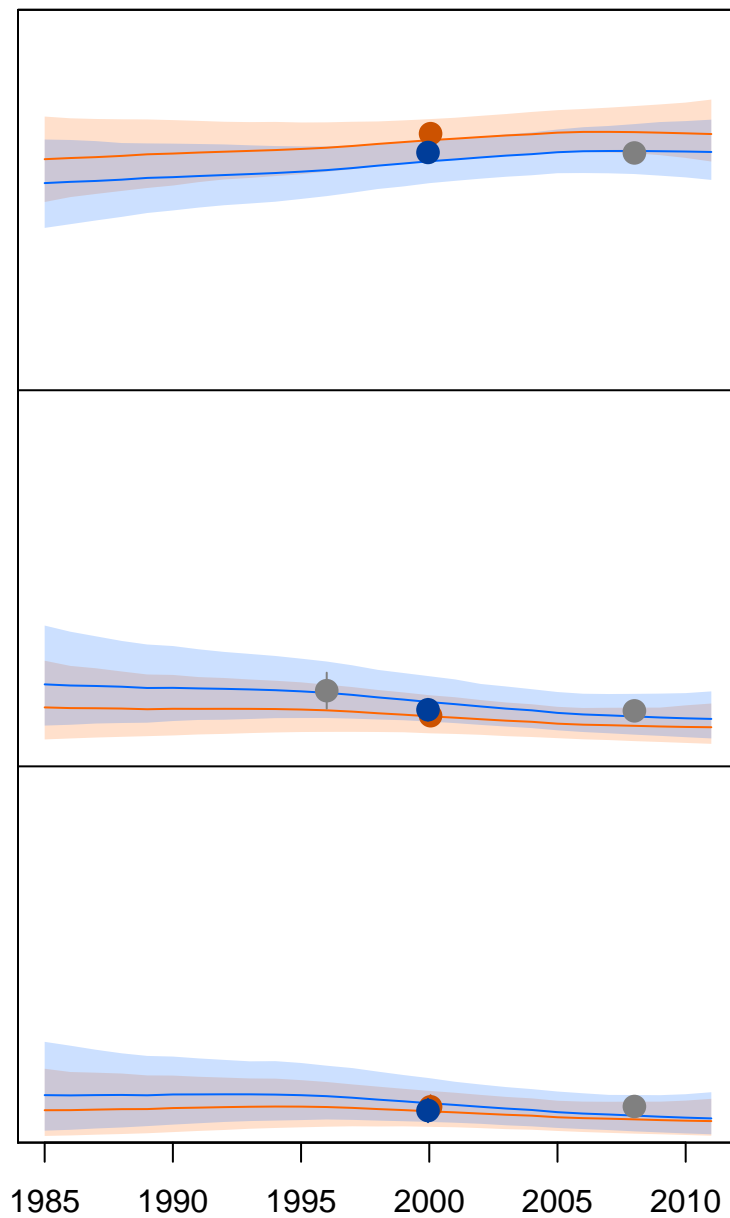

# Brazil

## Southern and Tropical Latin America Region

### HAZ

### WAZ

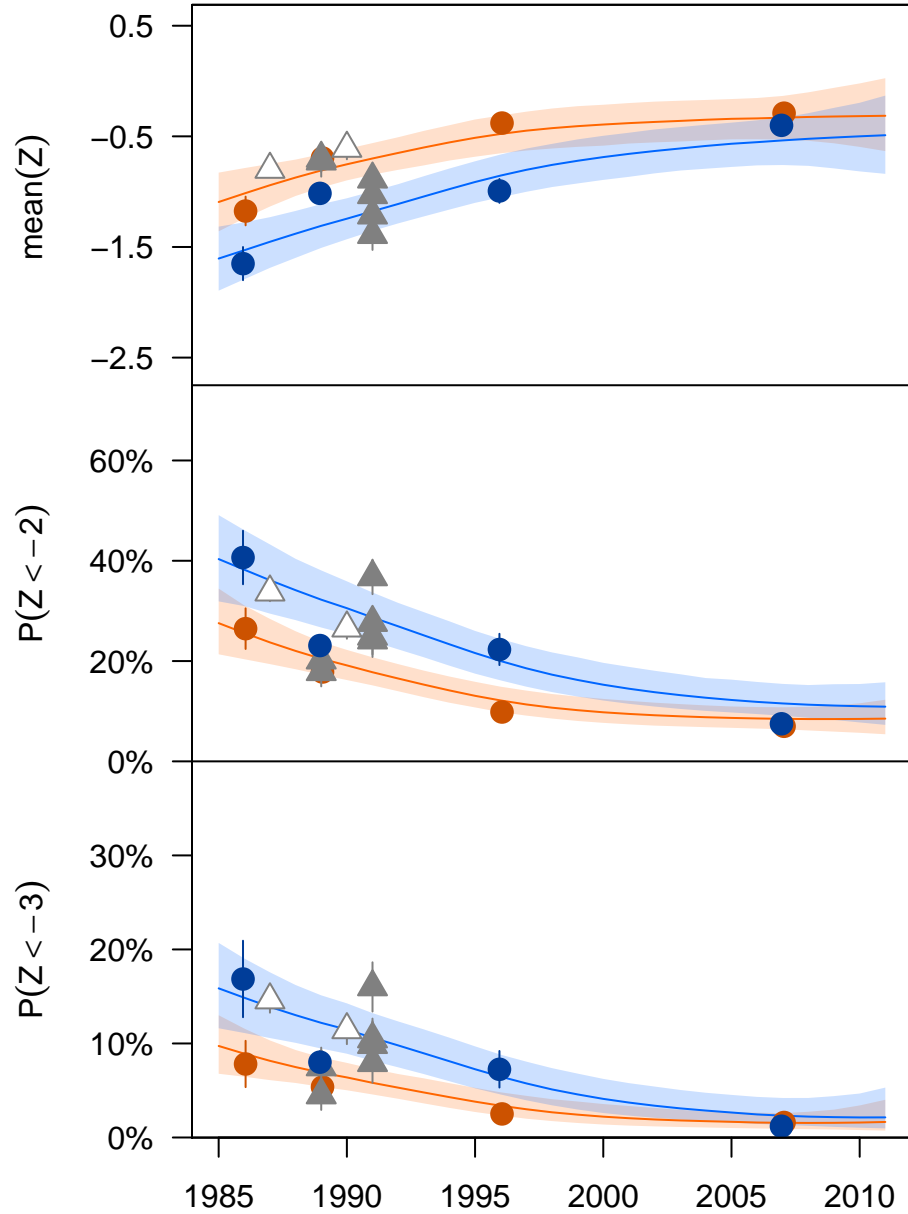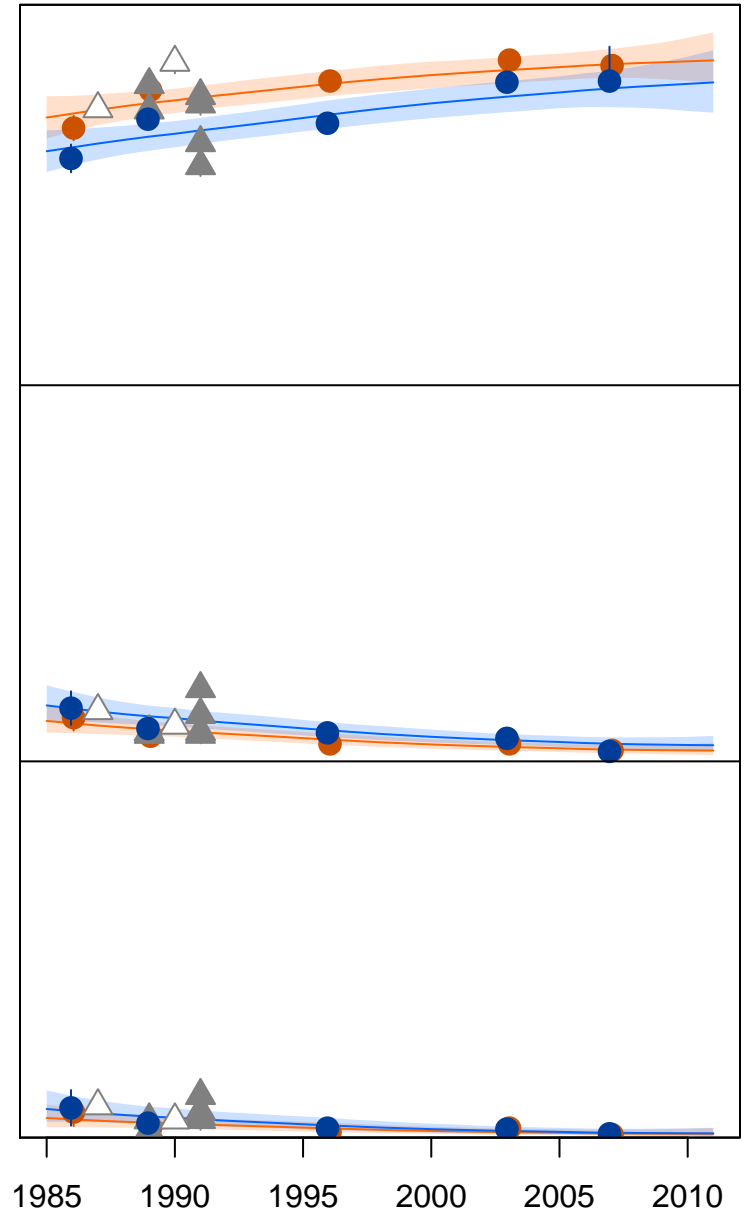

# Burkina Faso

## Sub-Saharan Africa Region

HAZ

WAZ

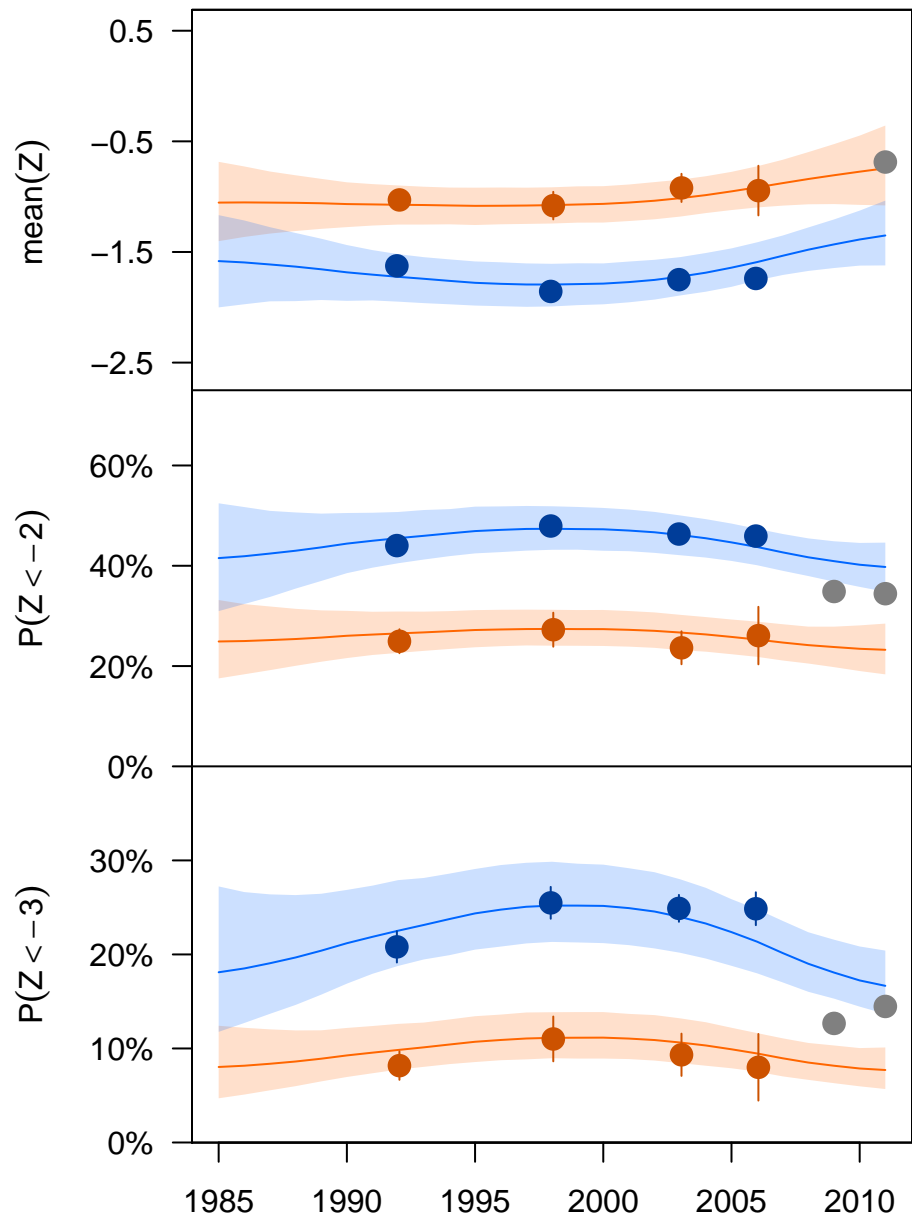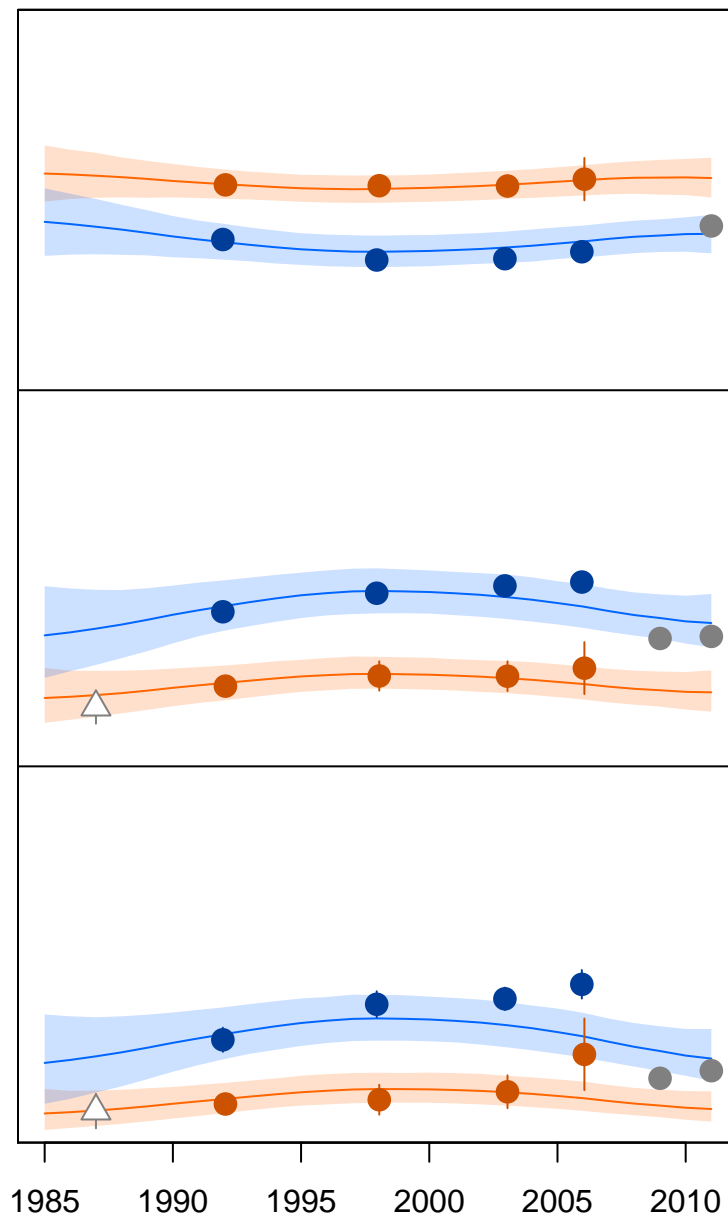

**Burundi**  
Sub-Saharan Africa Region

**HAZ**

**WAZ**

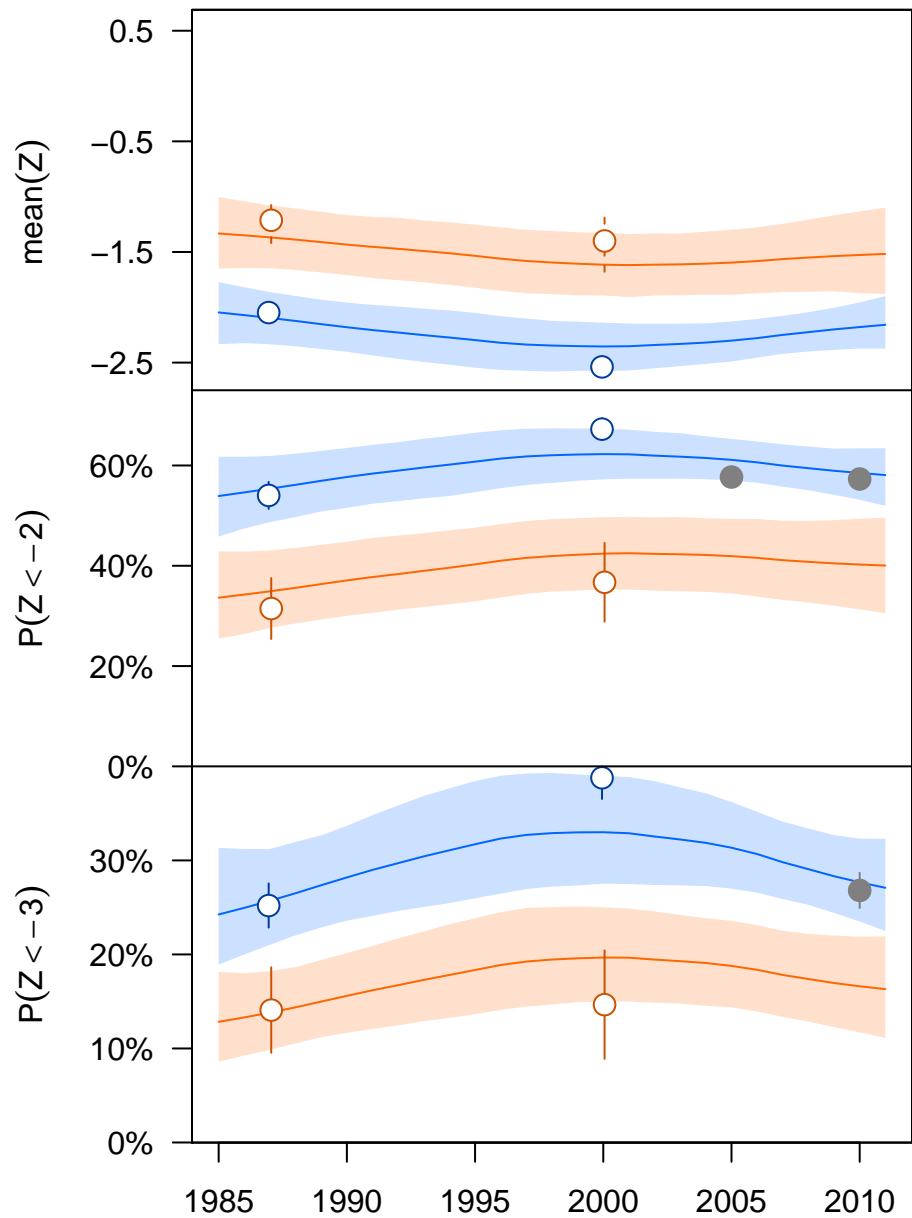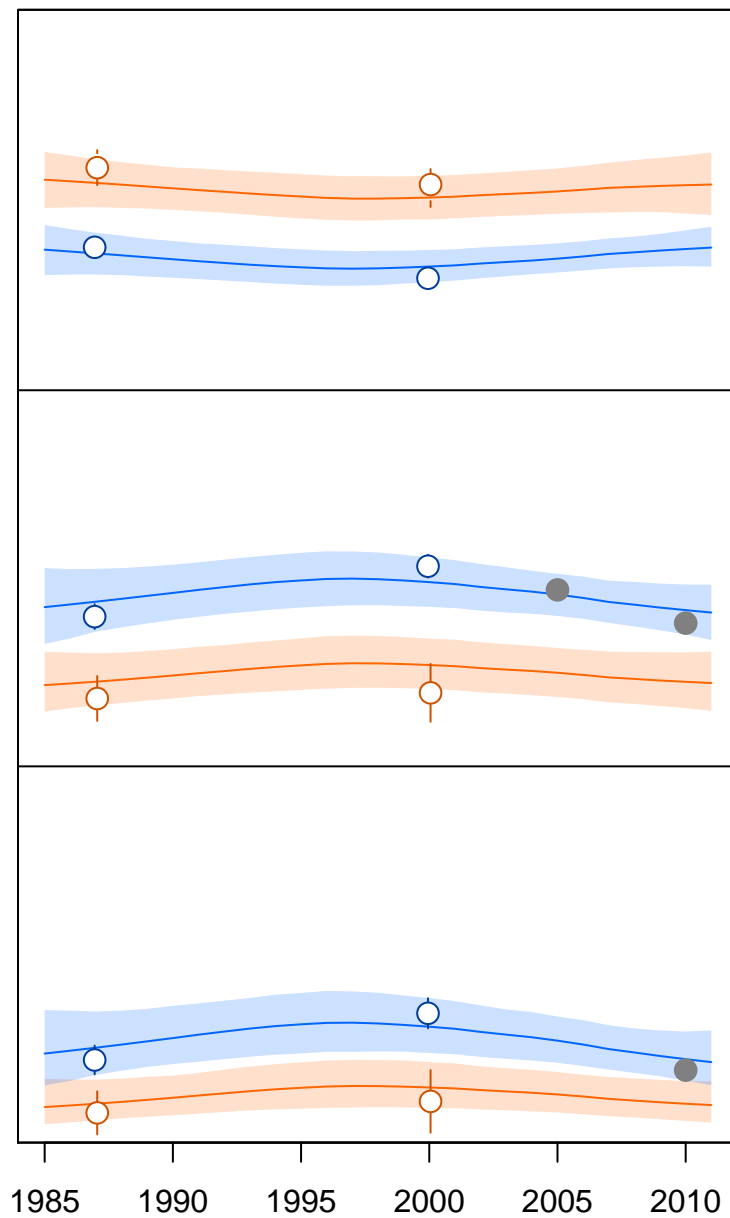

# Cambodia

East and Southeast Asia Region

### HAZ

### WAZ

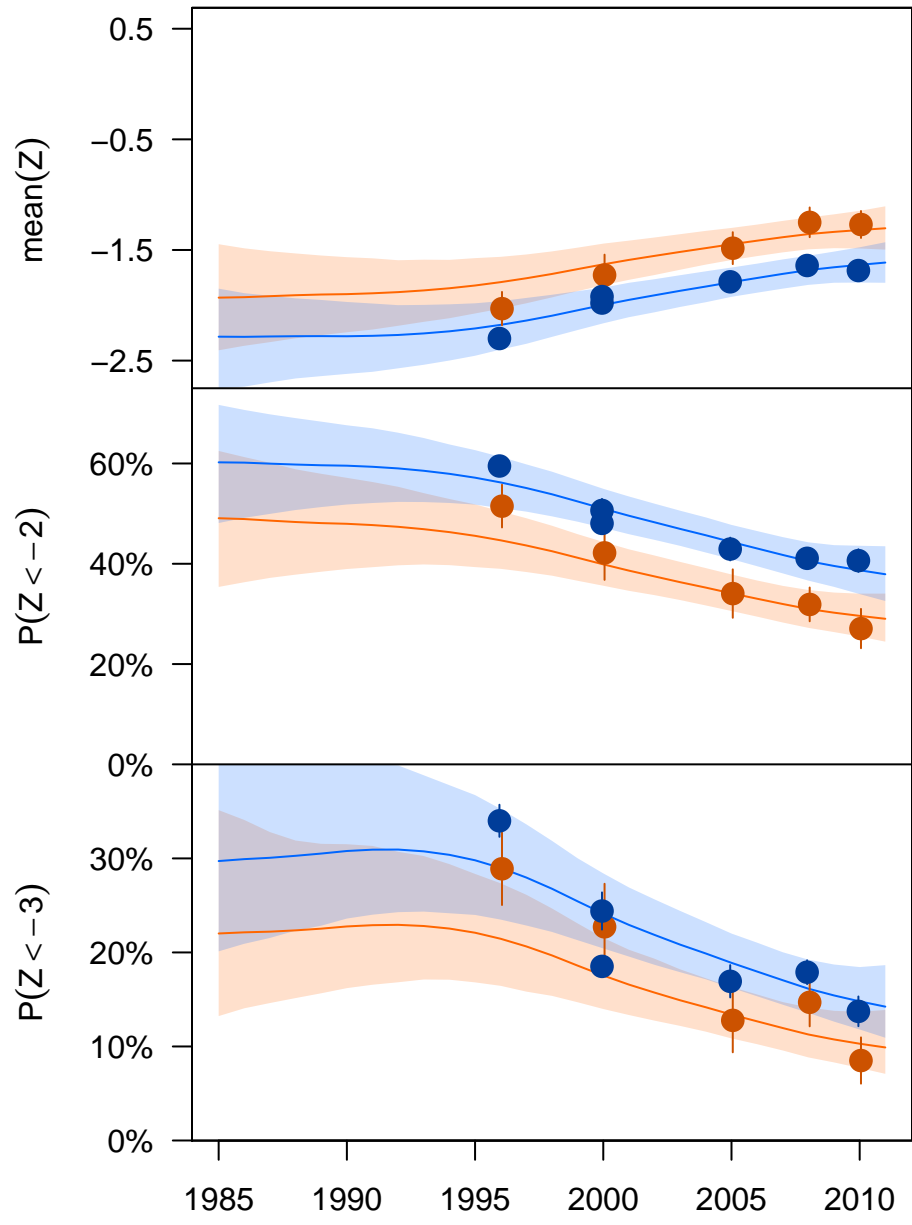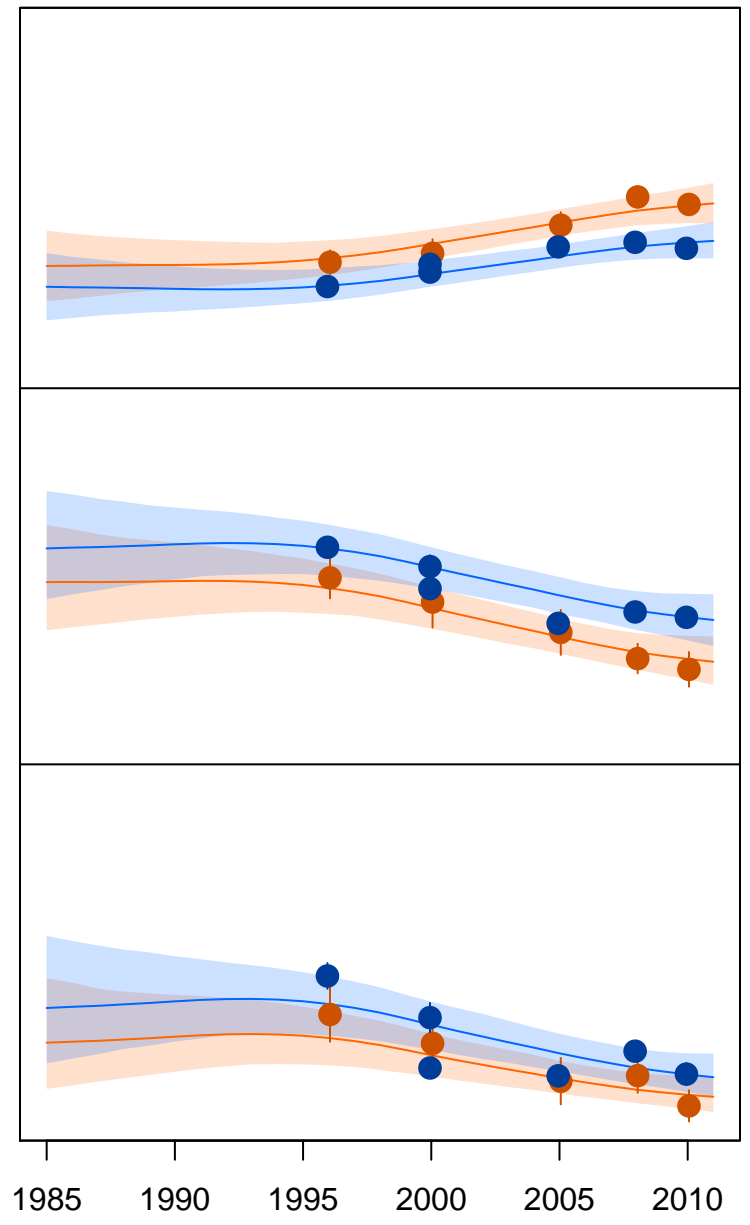

# Cameroon

## Sub-Saharan Africa Region

HAZ

WAZ

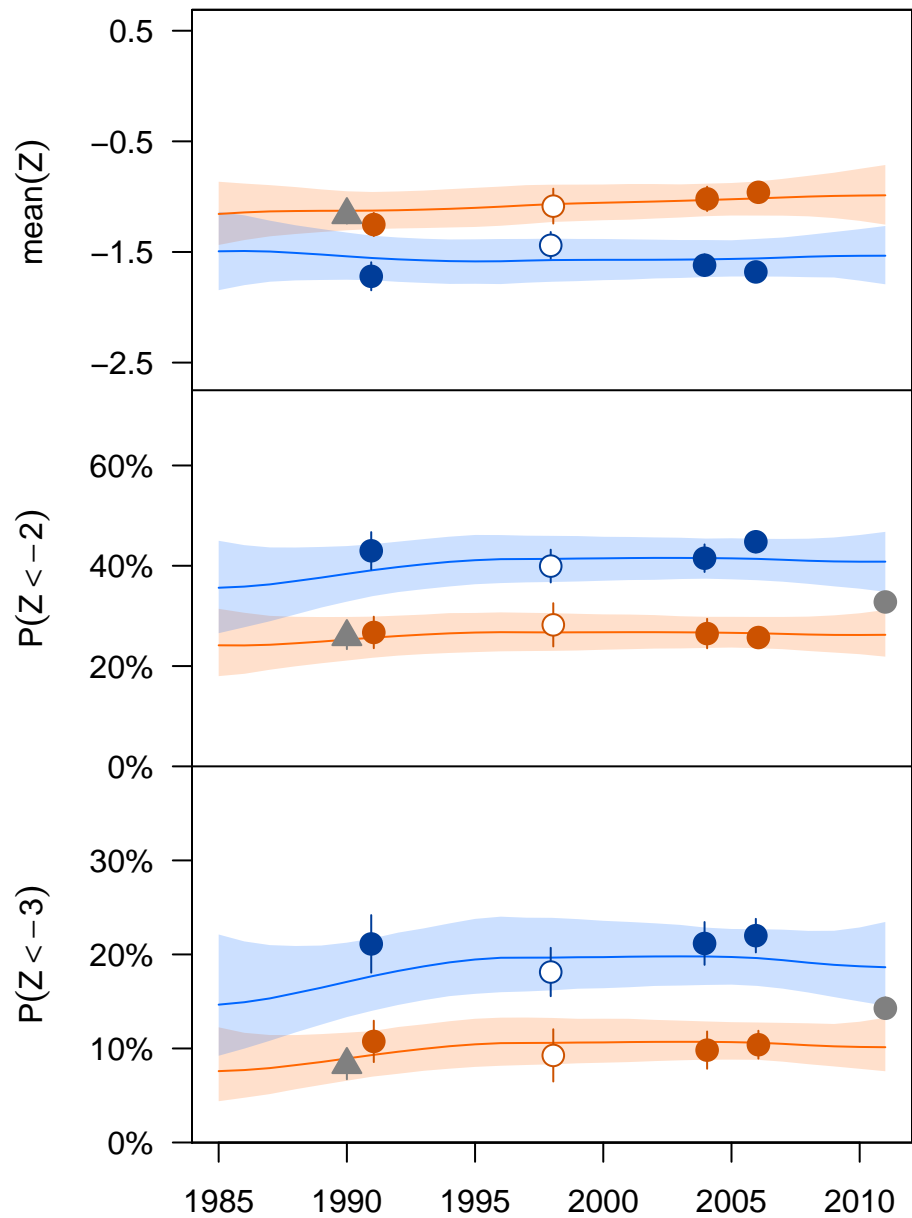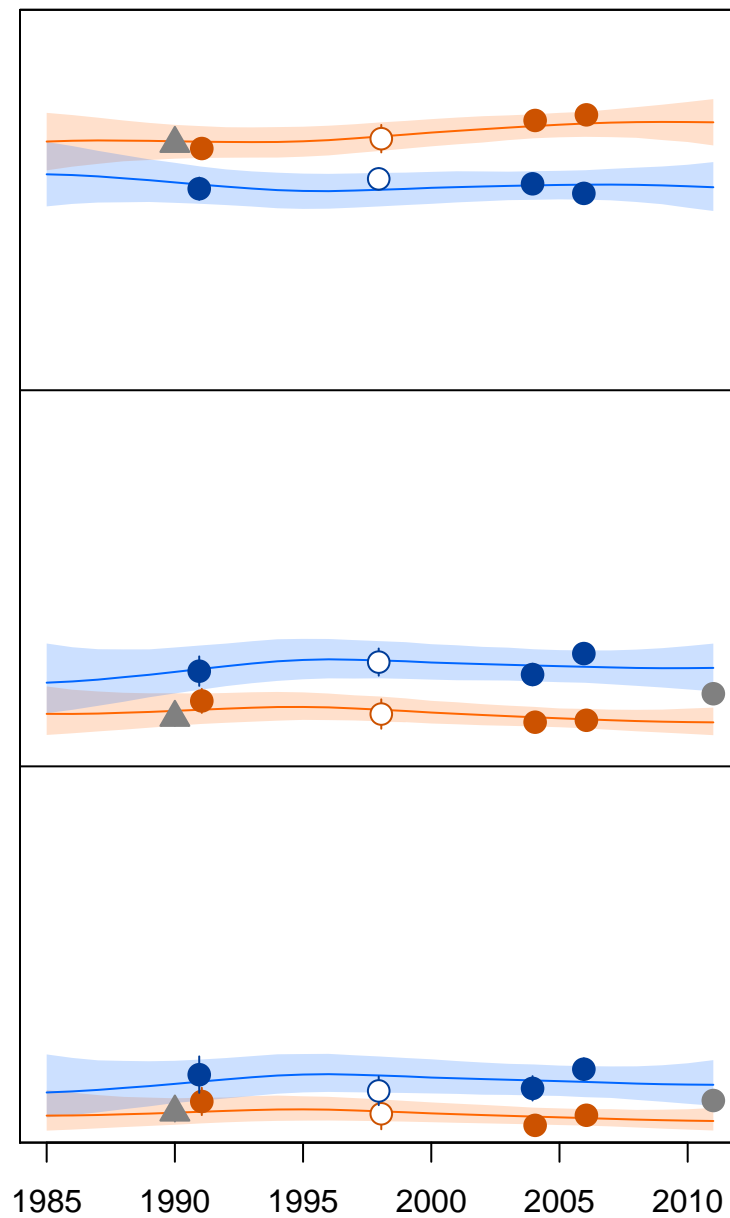

# Cape Verde

## Sub-Saharan Africa Region

70

### HAZ

### WAZ

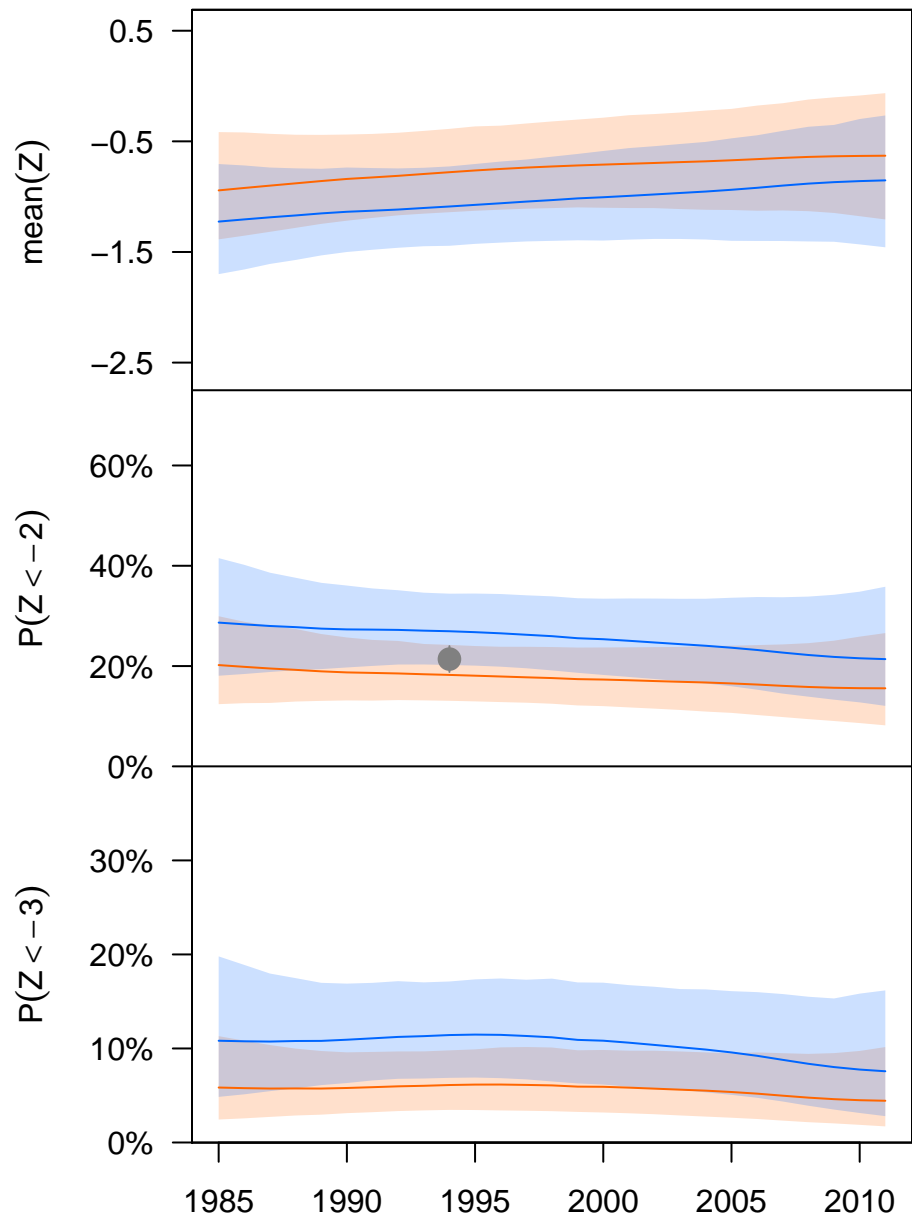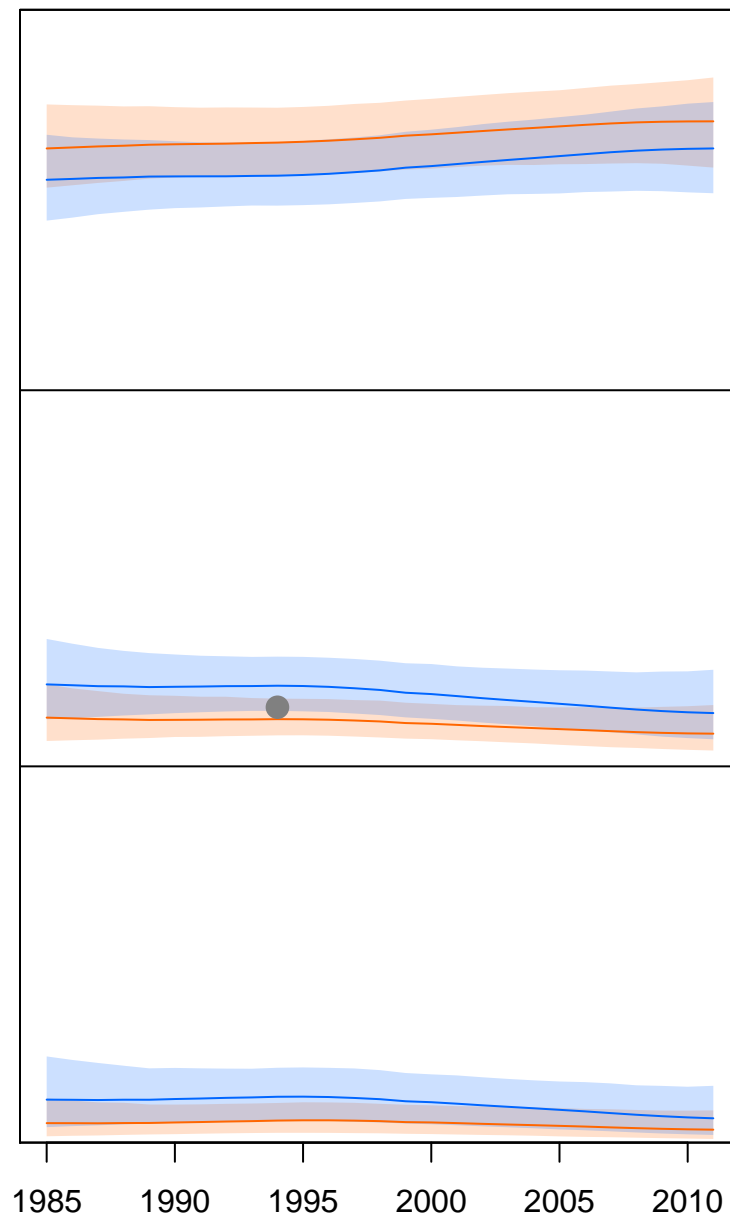

# Central African Republic

## Sub-Saharan Africa Region

71

### HAZ

### WAZ

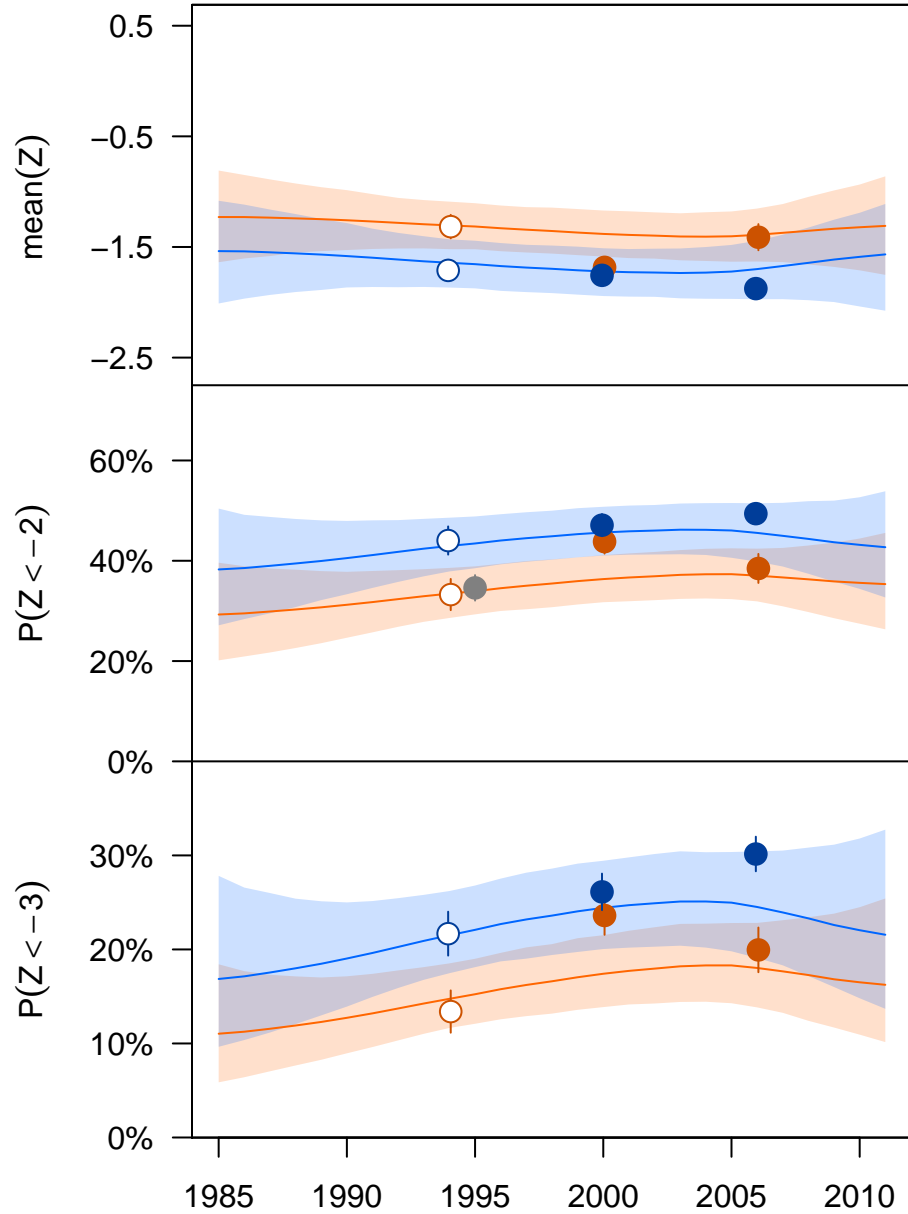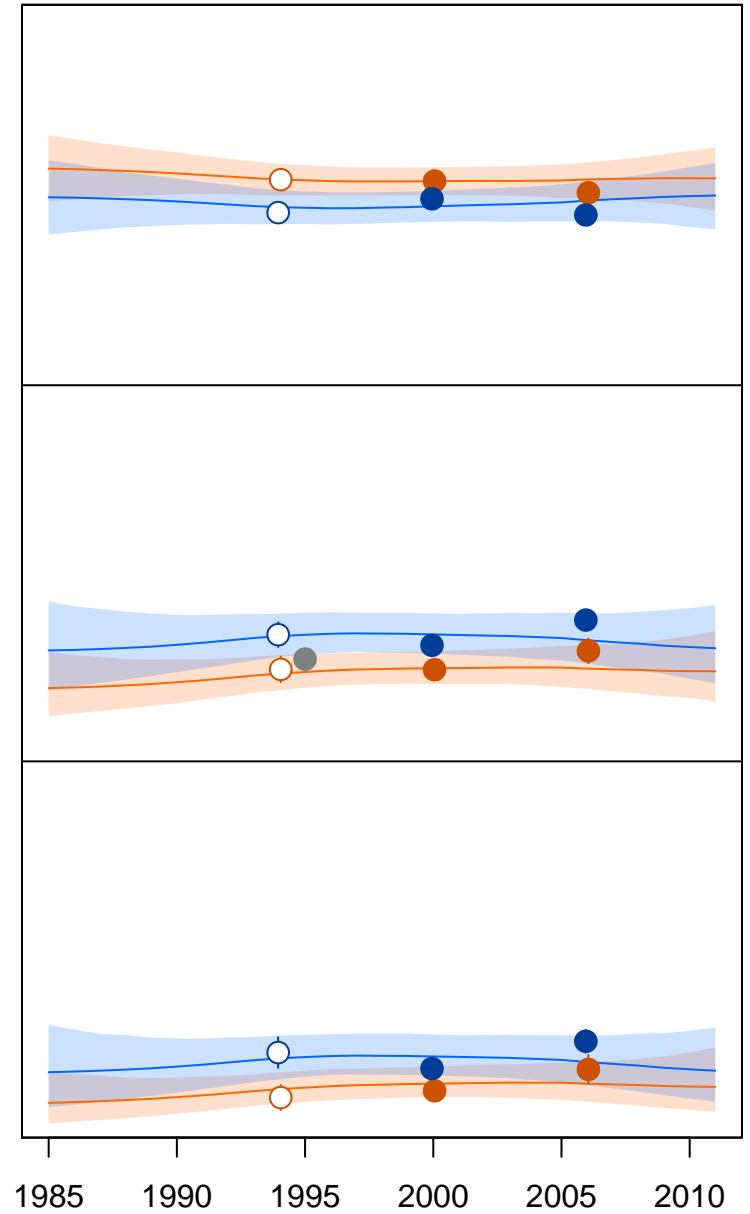



# Chad

## Sub-Saharan Africa Region

### HAZ

### WAZ

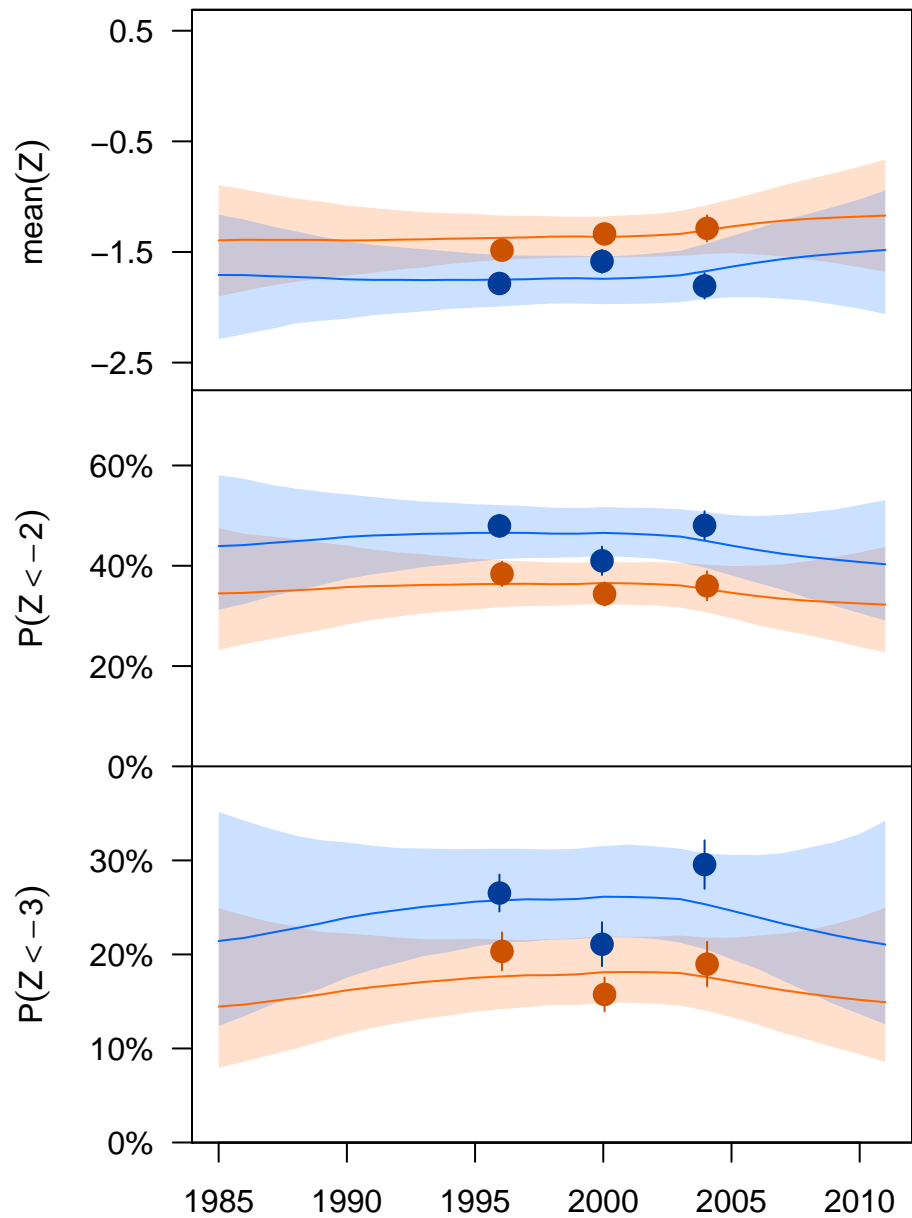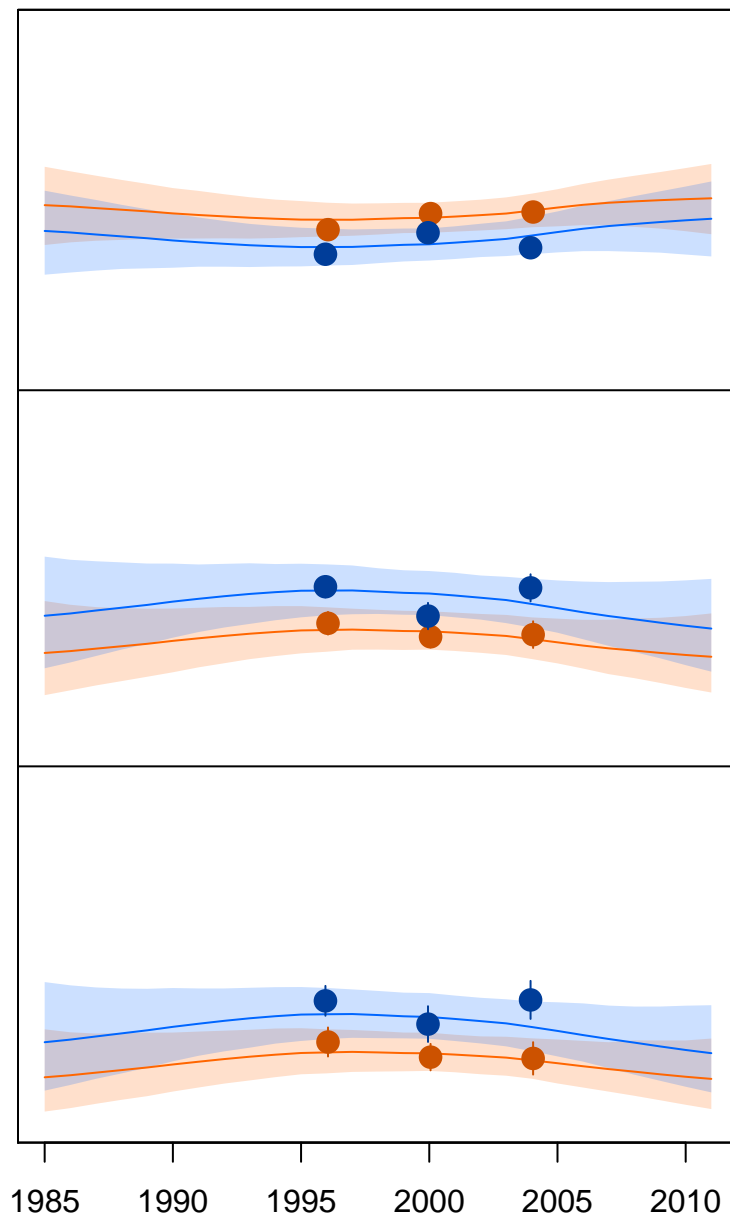

# Chile

## Southern and Tropical Latin America Region

### HAZ

### WAZ

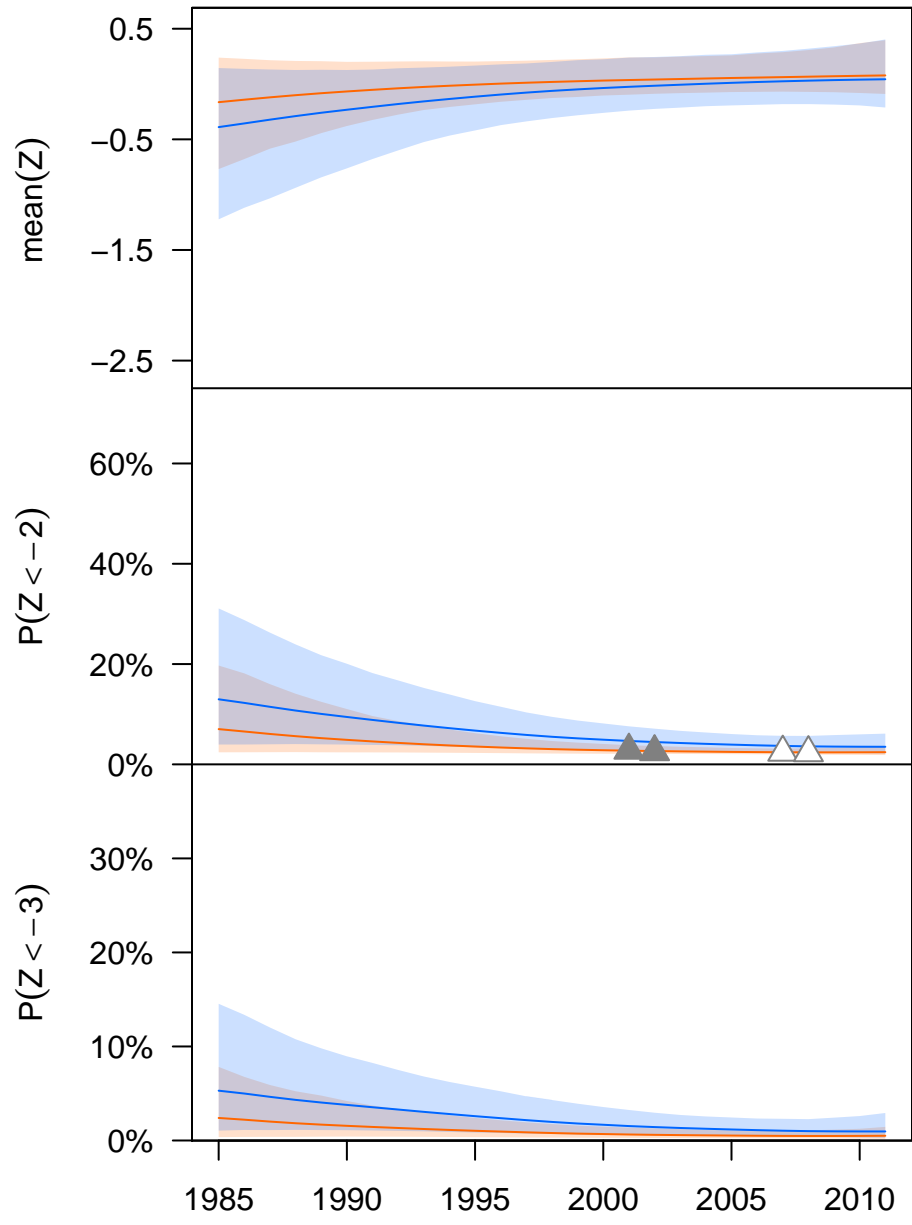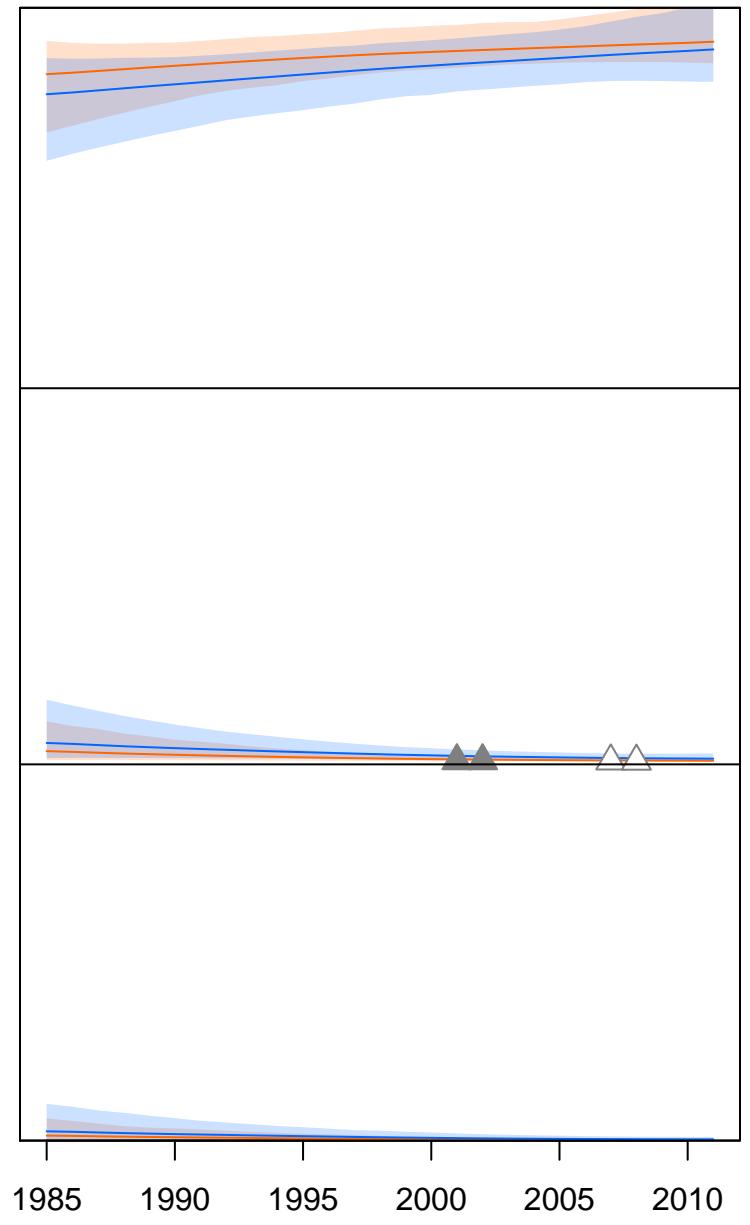

# China

## East and Southeast Asia Region

### HAZ

### WAZ

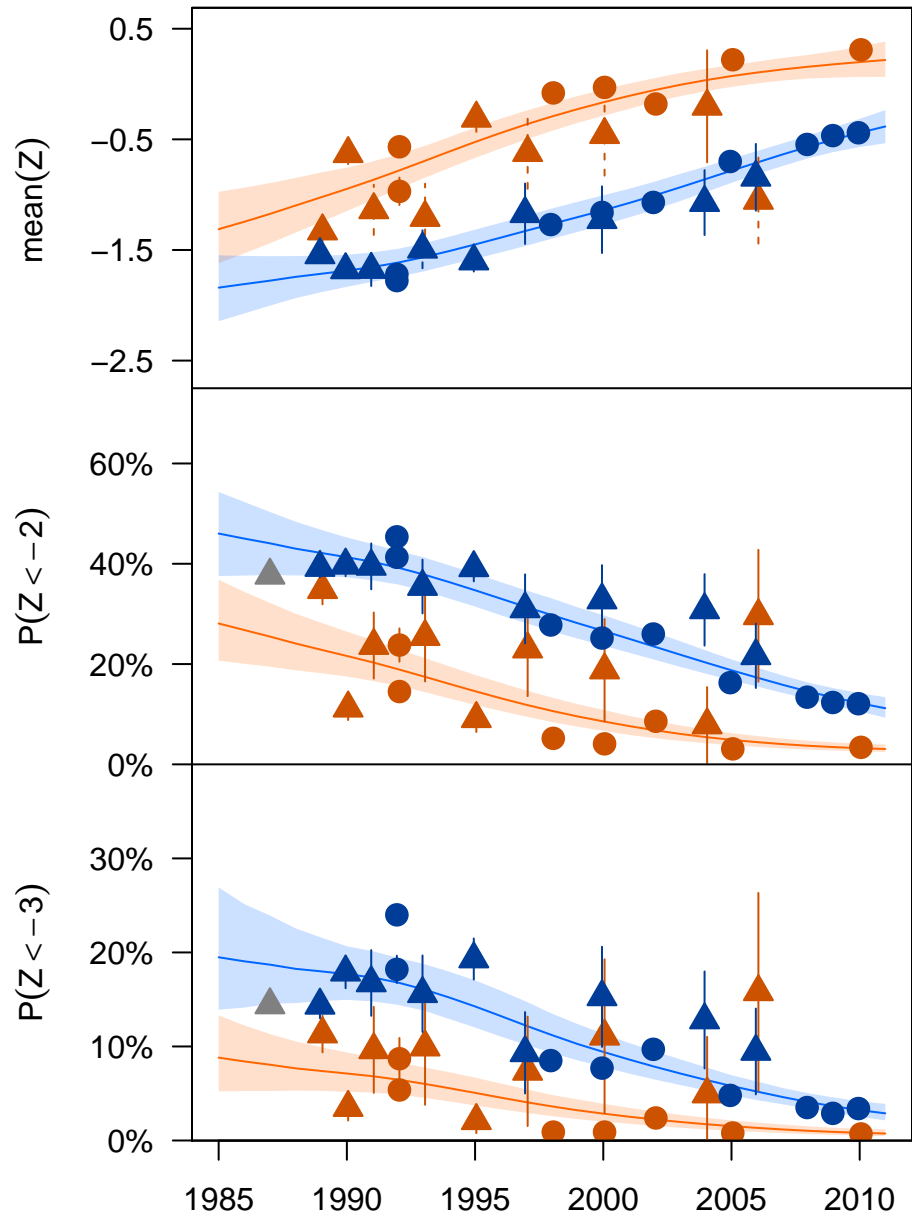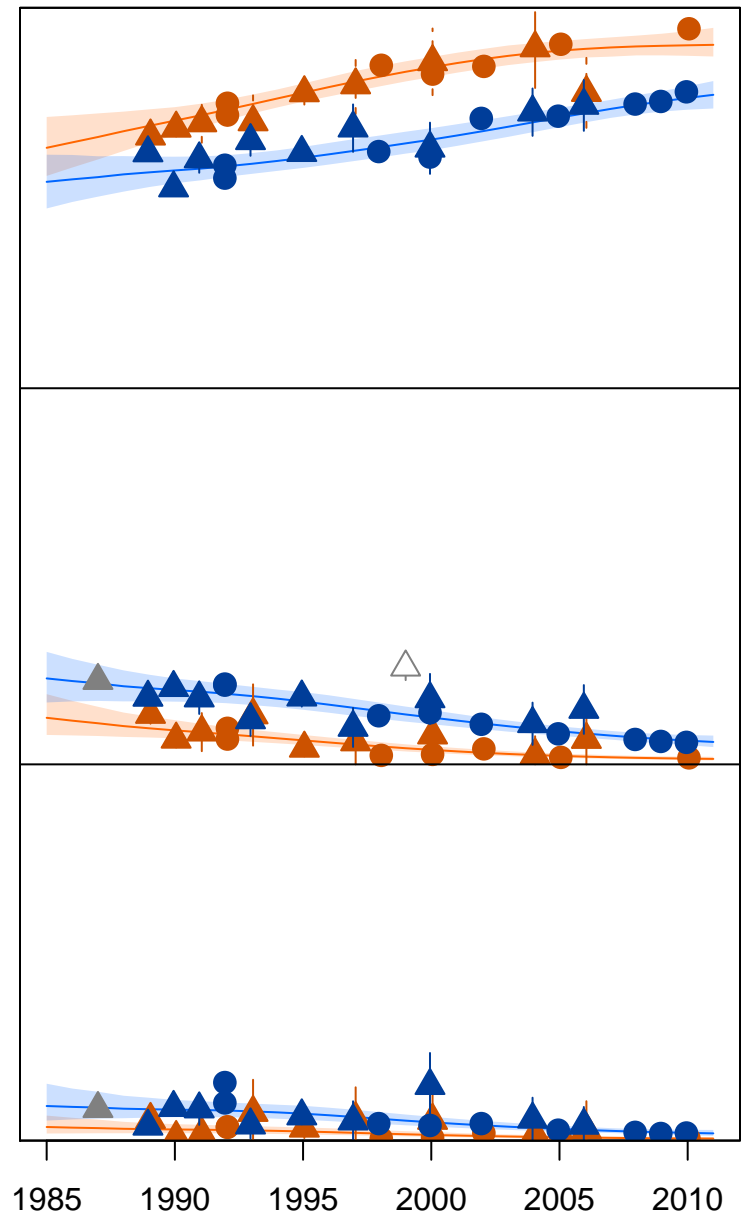

# China (Hong Kong SAR)

East and Southeast Asia Region

75

## HAZ

## WAZ

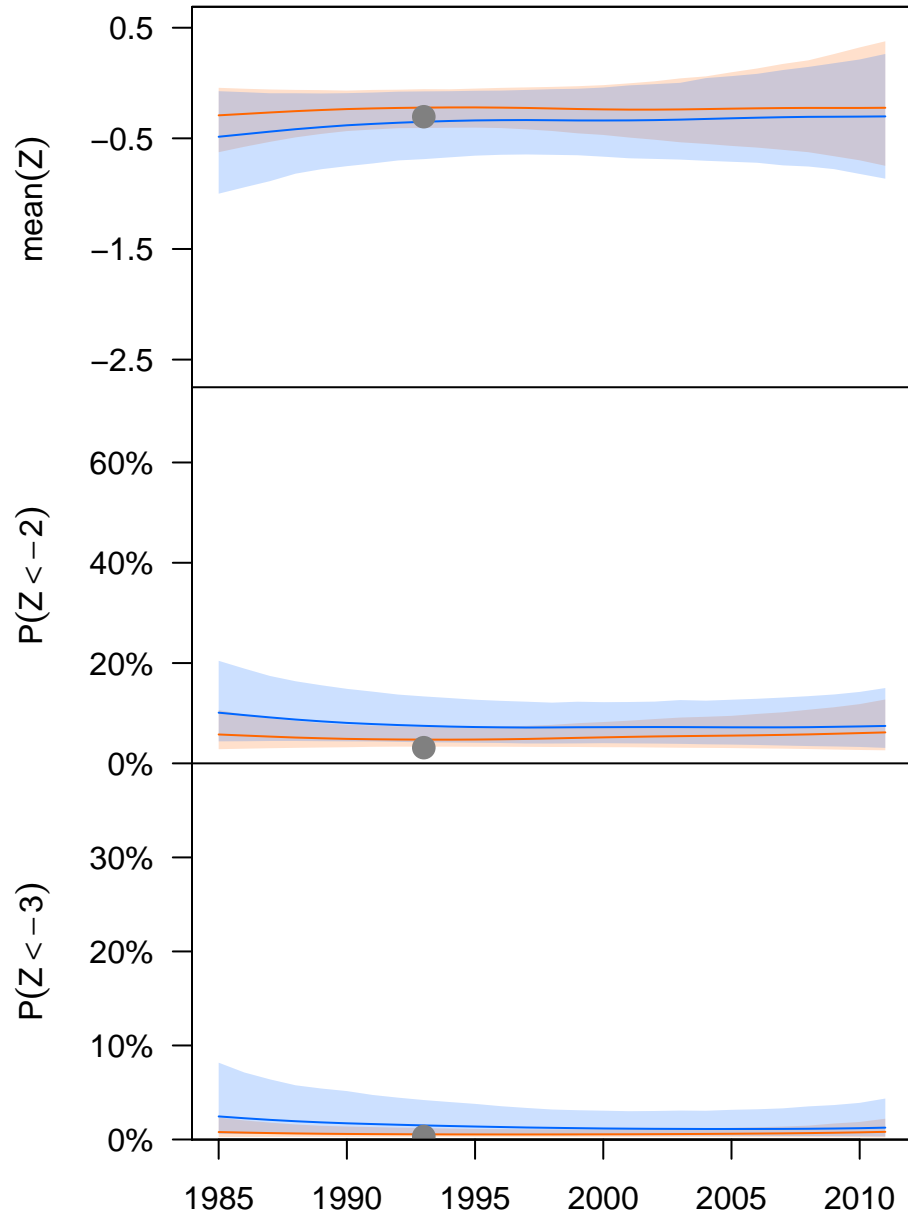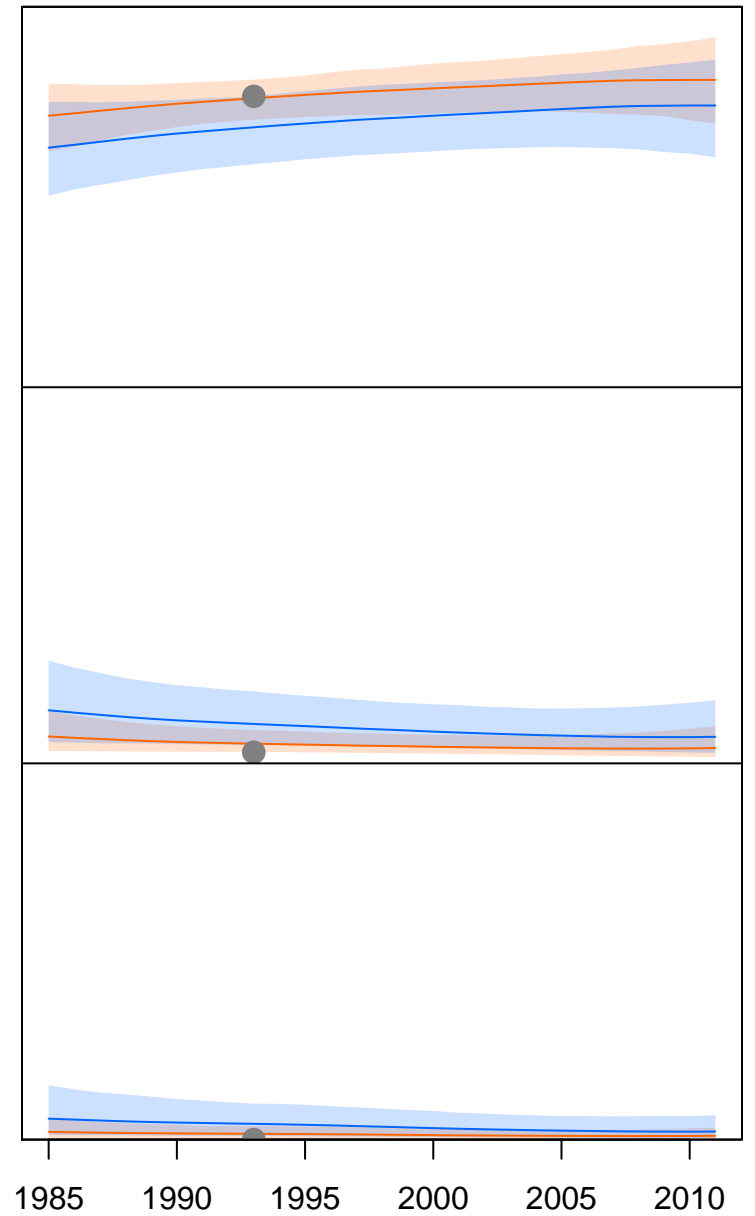

# China (Macao SAR)

East and Southeast Asia Region

### HAZ

### WAZ

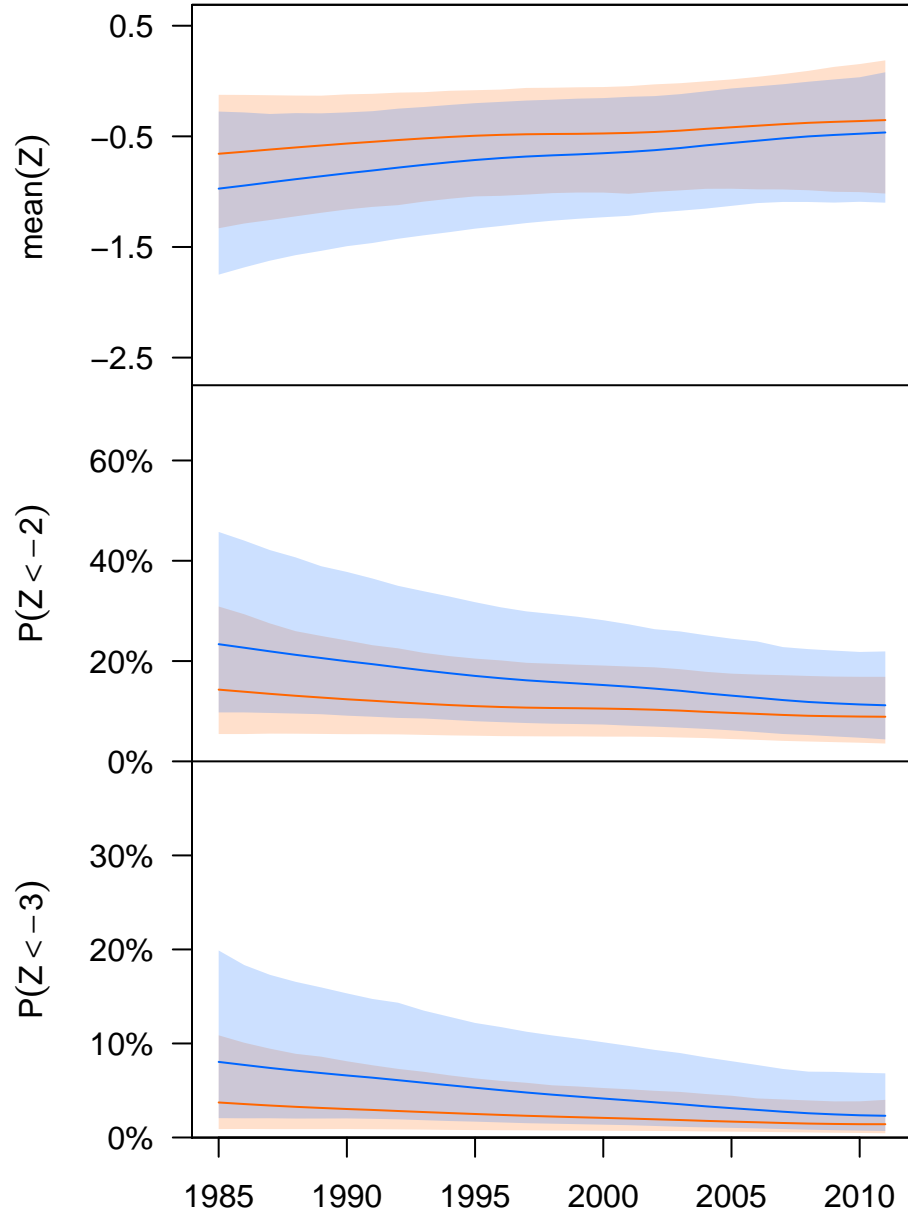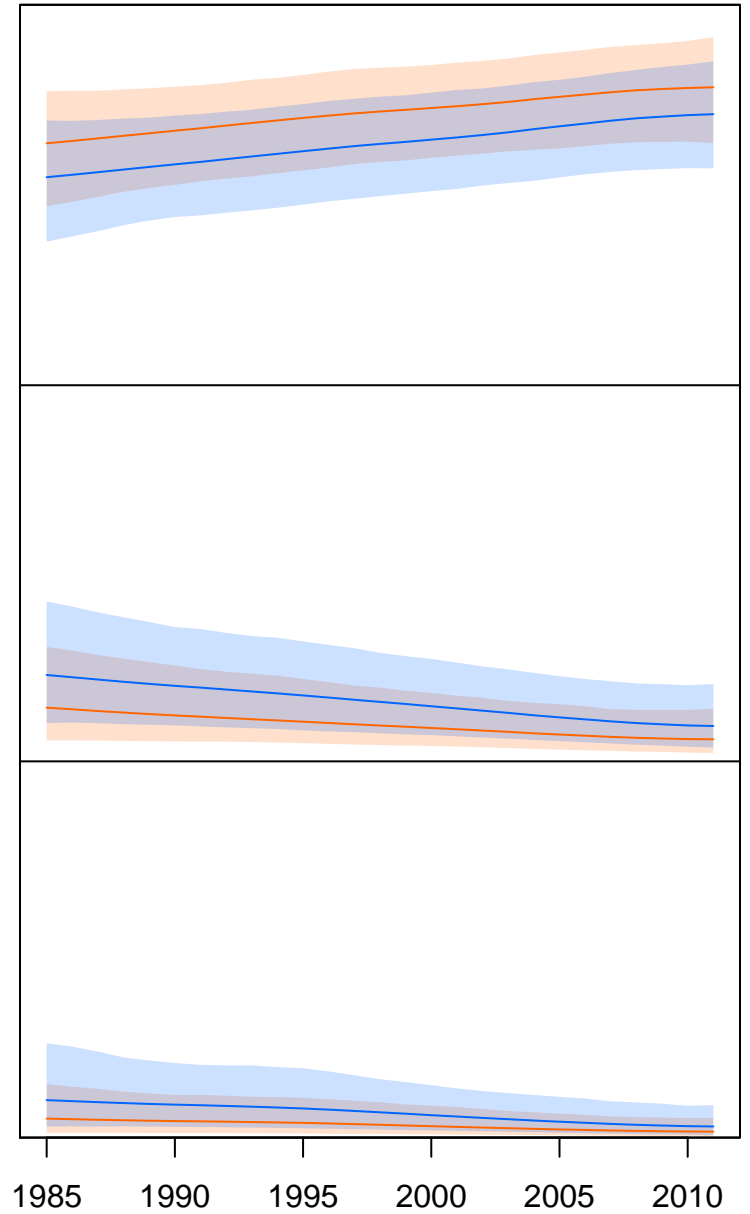

# Colombia

Andean and Central Latin America and Caribbean Region

## HAZ

## WAZ

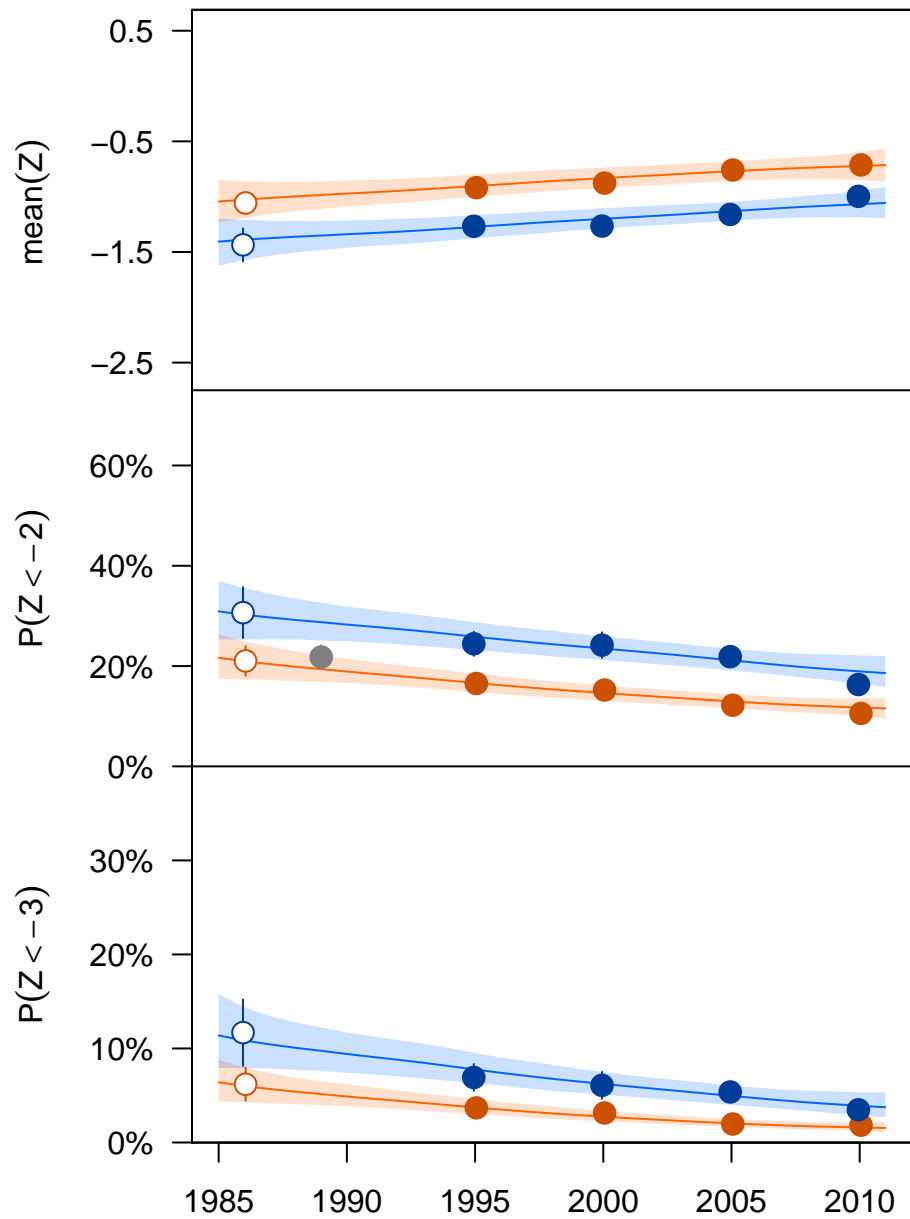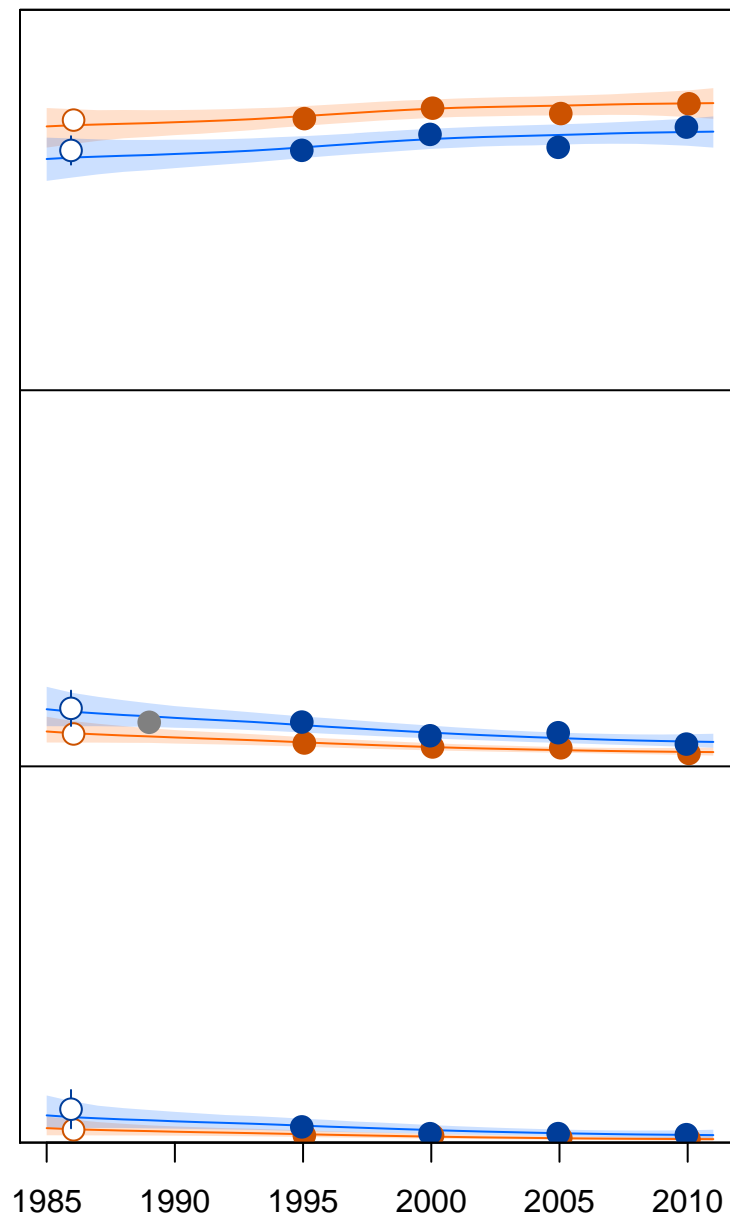

# Comoros

## Sub-Saharan Africa Region

### HAZ

### WAZ

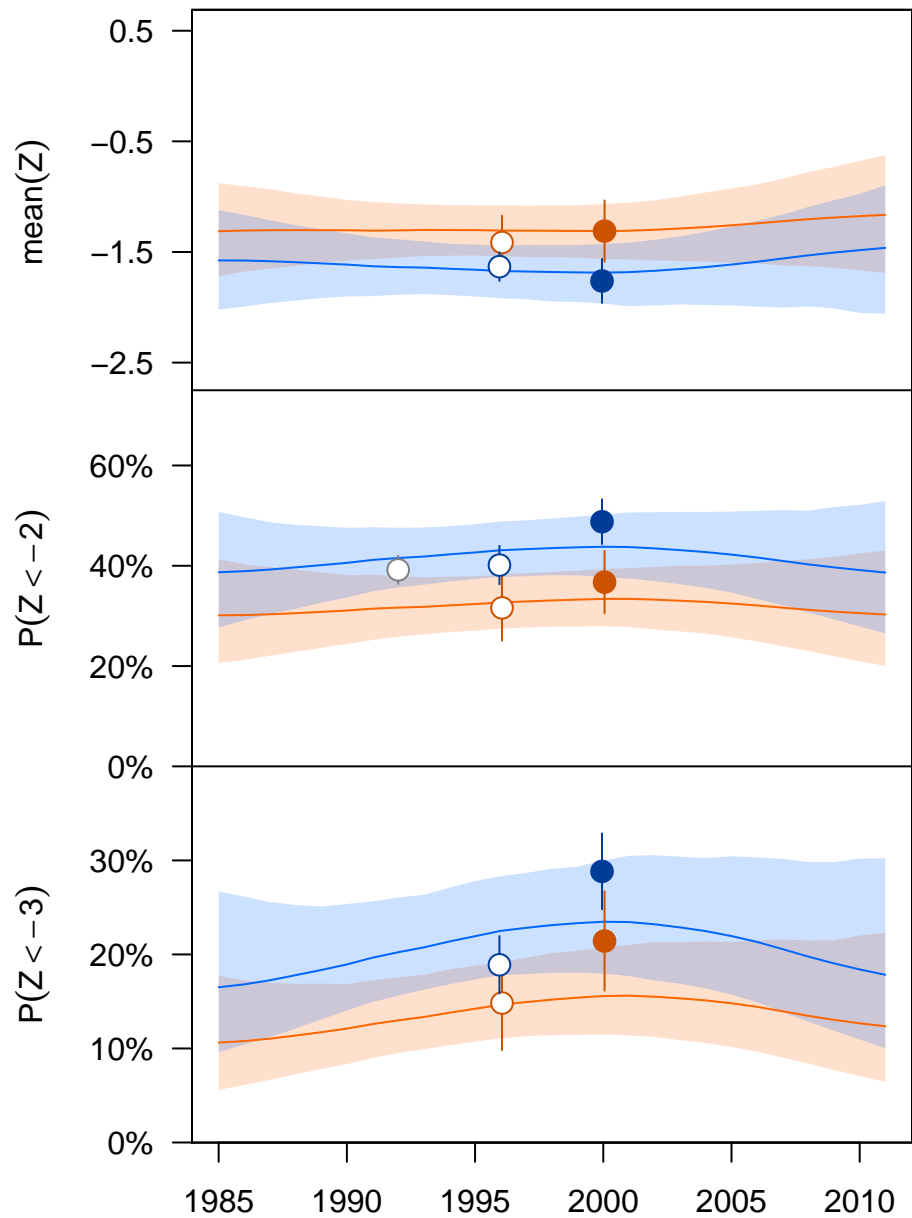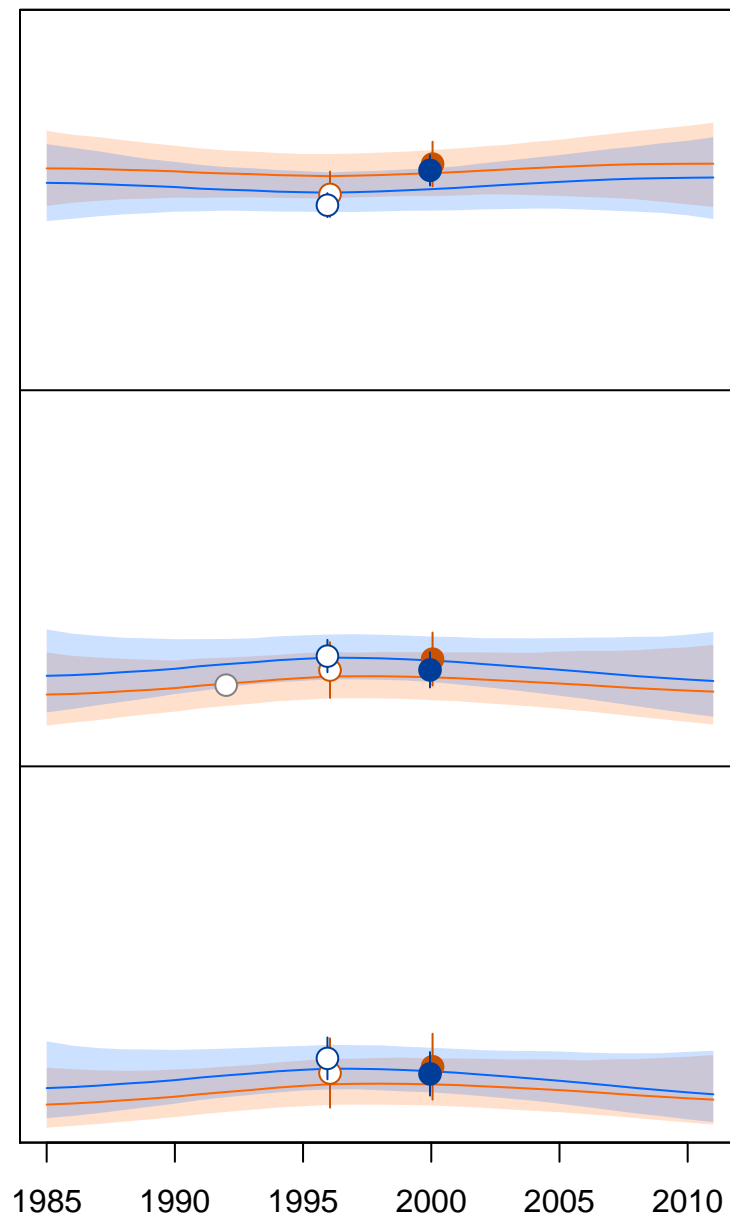

# Congo

## Sub-Saharan Africa Region

HAZ

WAZ

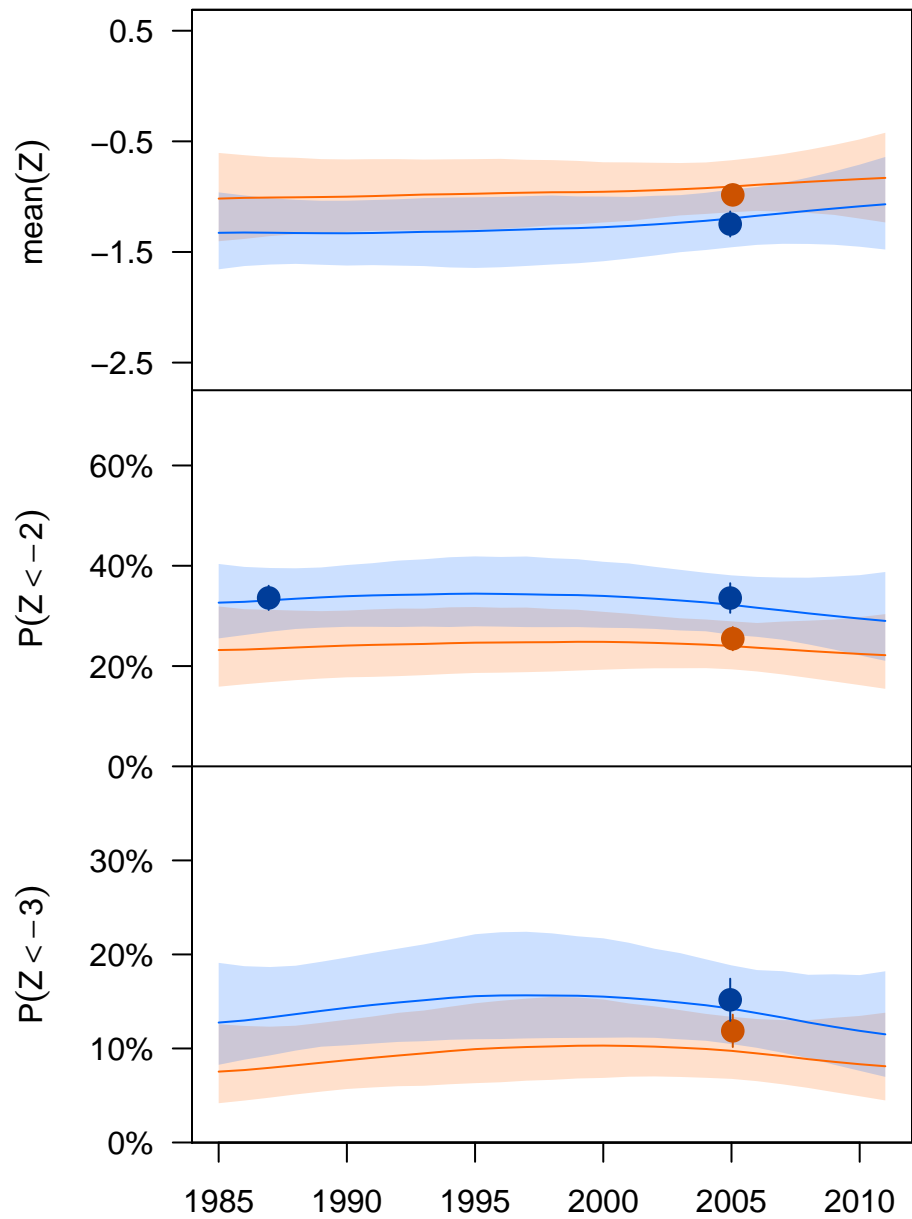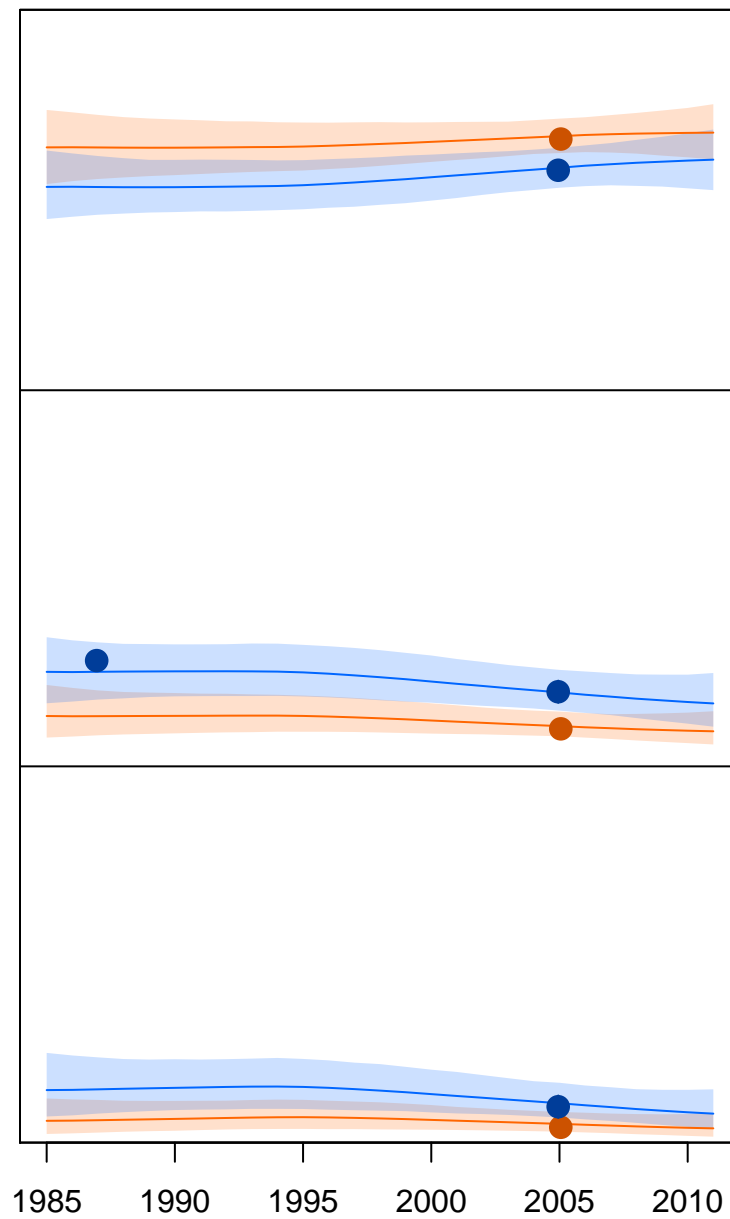



# Costa Rica

Andean and Central Latin America and Caribbean Region

80

## HAZ

## WAZ

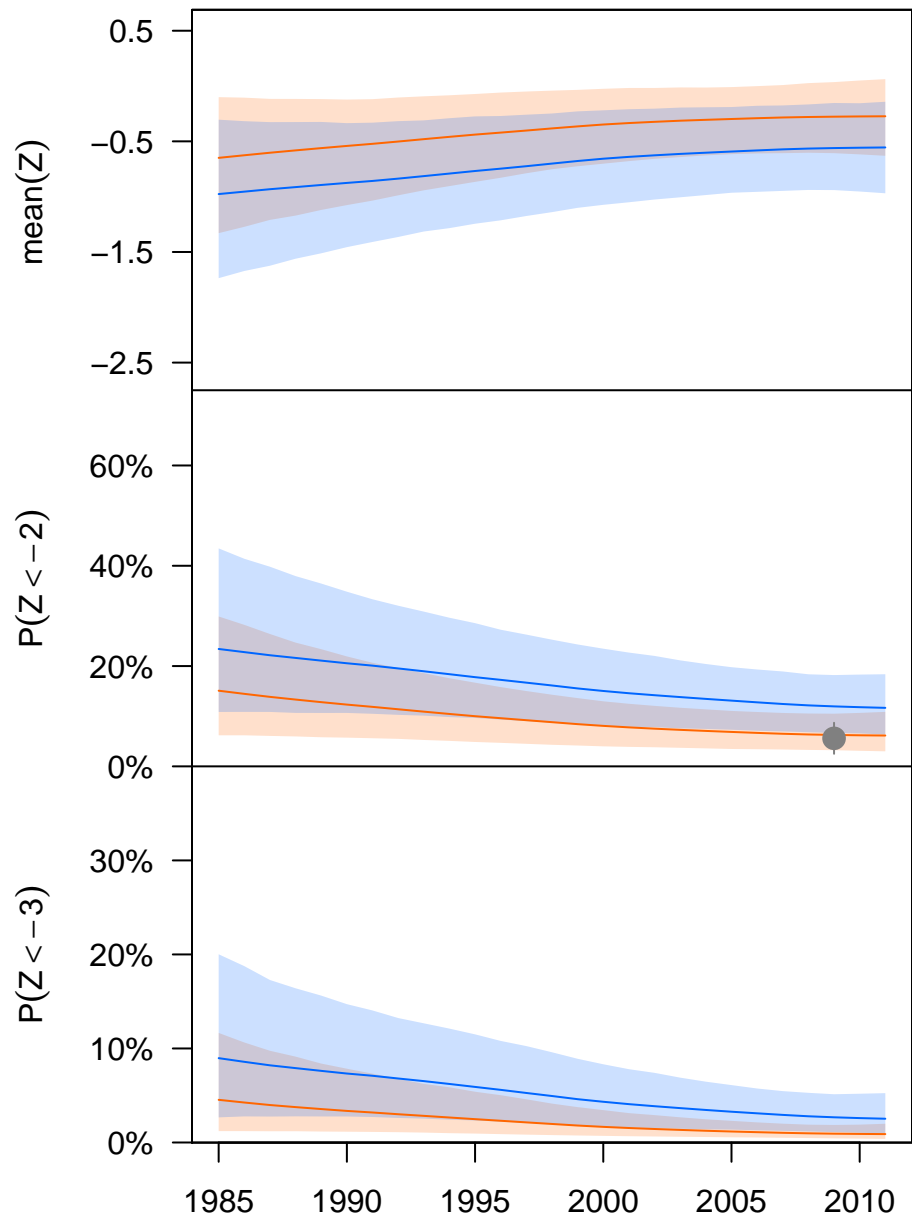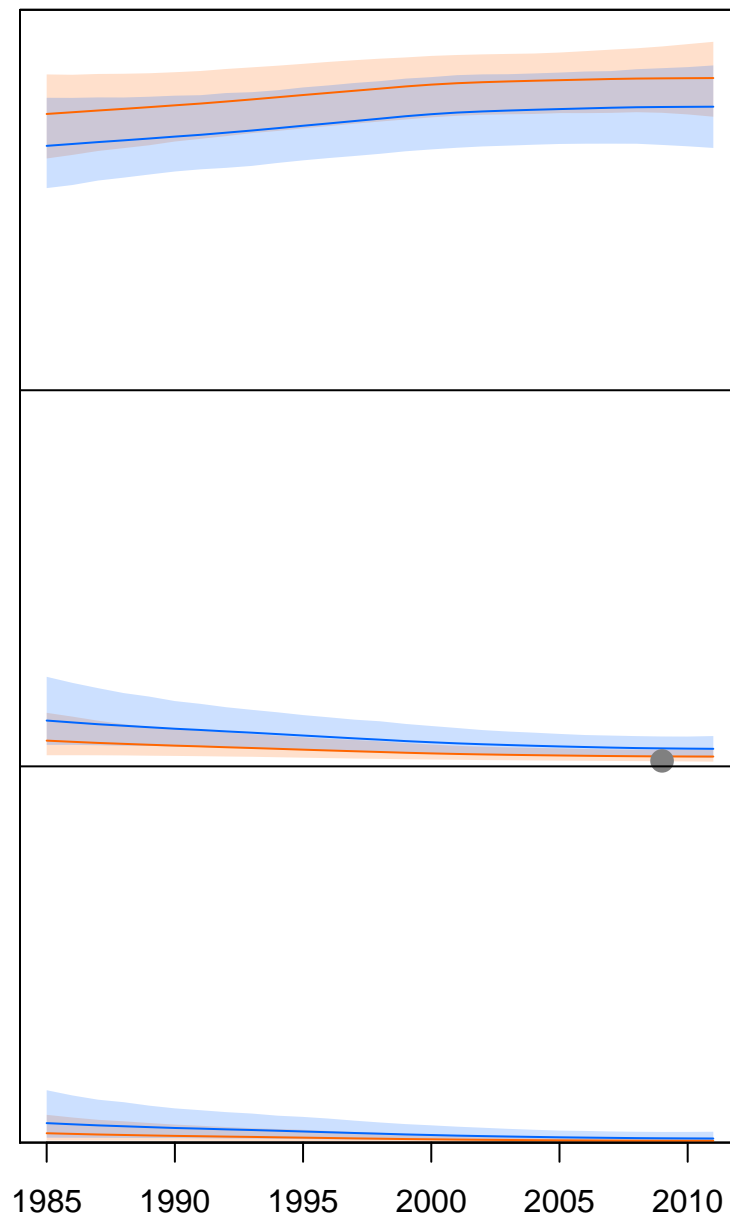

# Côte d'Ivoire

## Sub-Saharan Africa Region

### HAZ

### WAZ

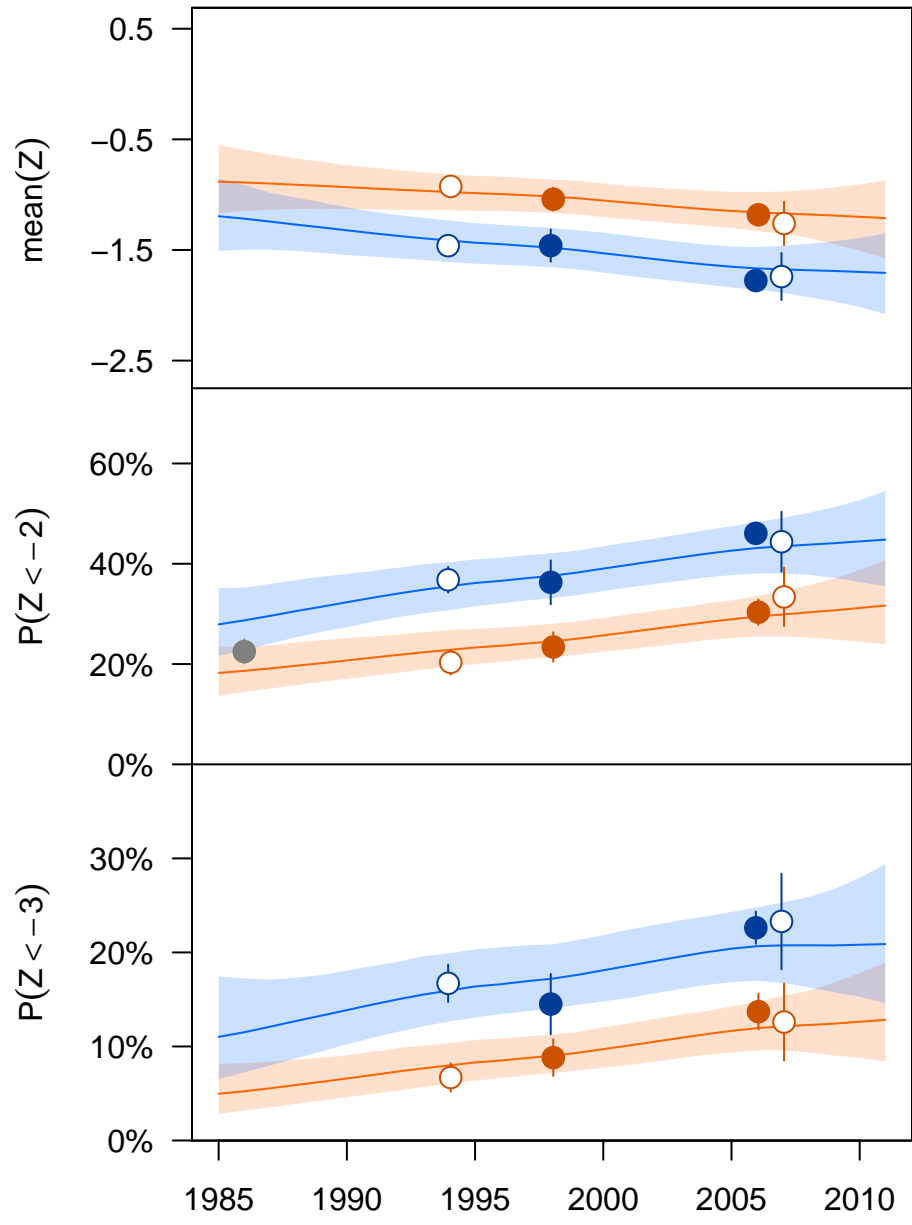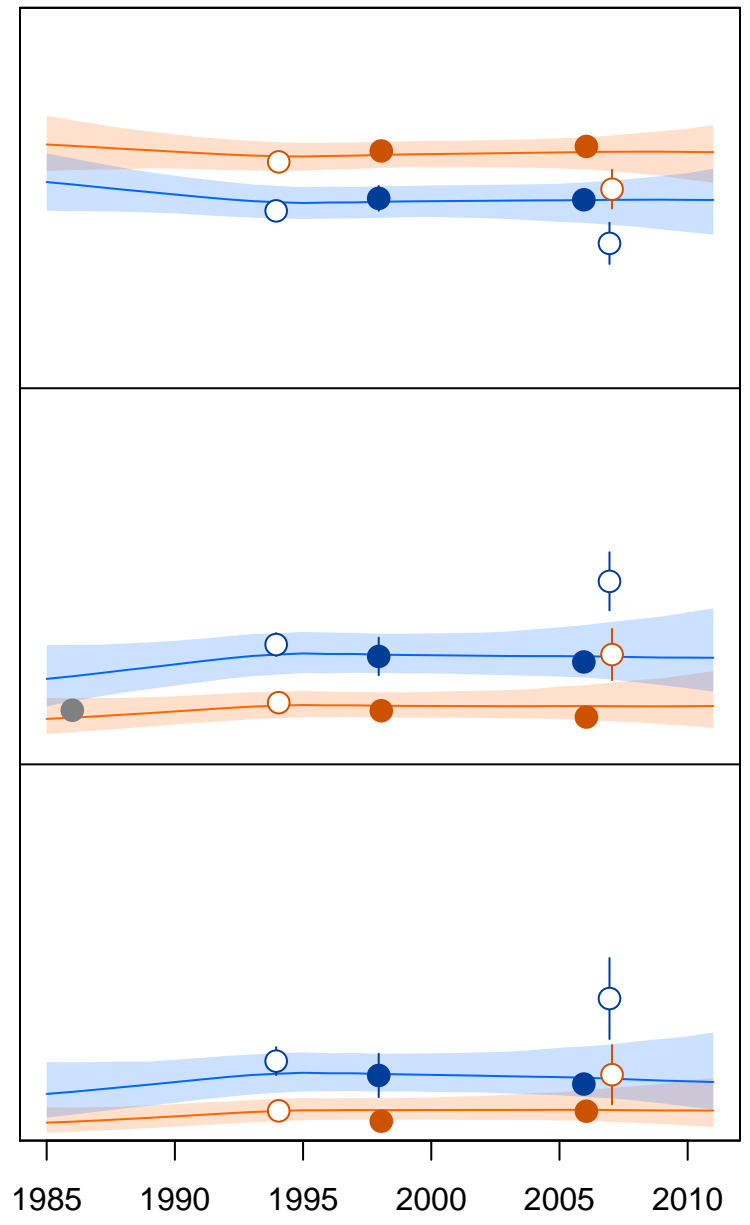

# Cuba

Andean and Central Latin America and Caribbean Region

## HAZ

## WAZ

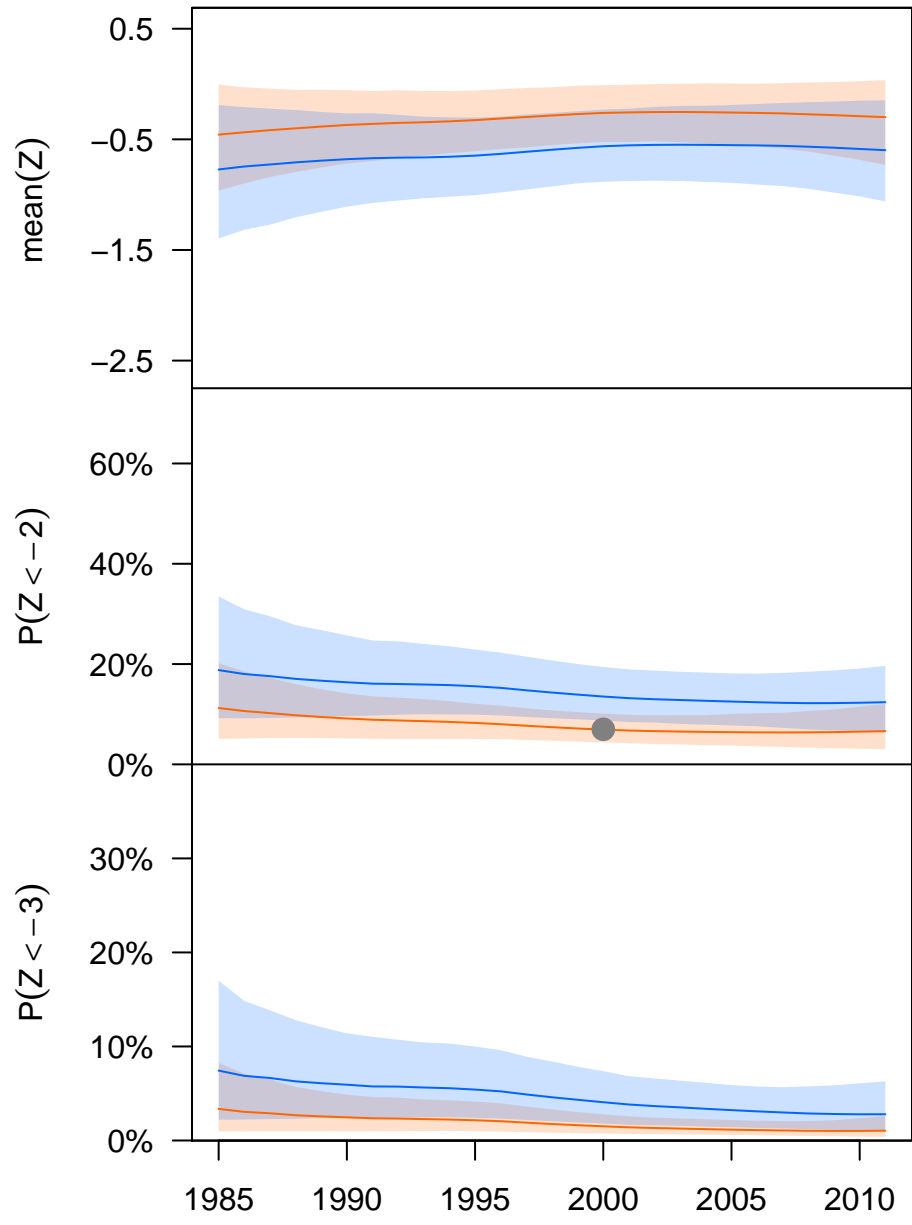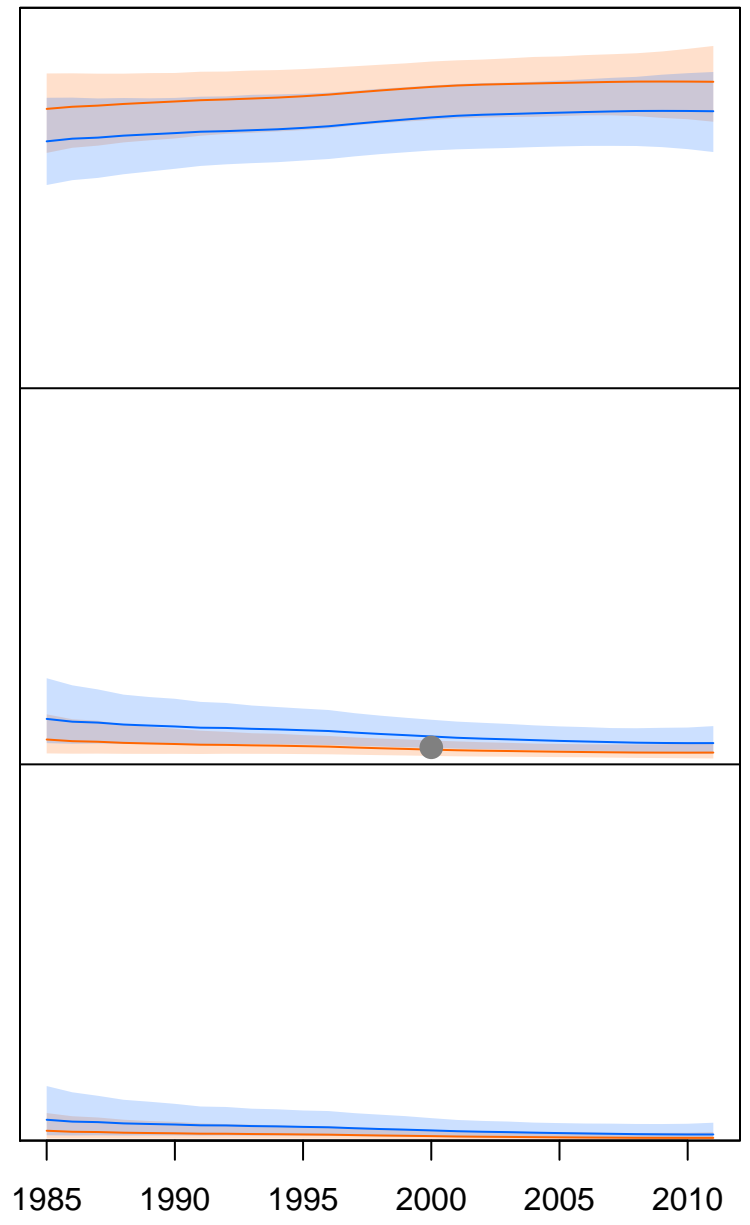

# Democratic People's Republic of Korea

## East and Southeast Asia Region

### HAZ

### WAZ

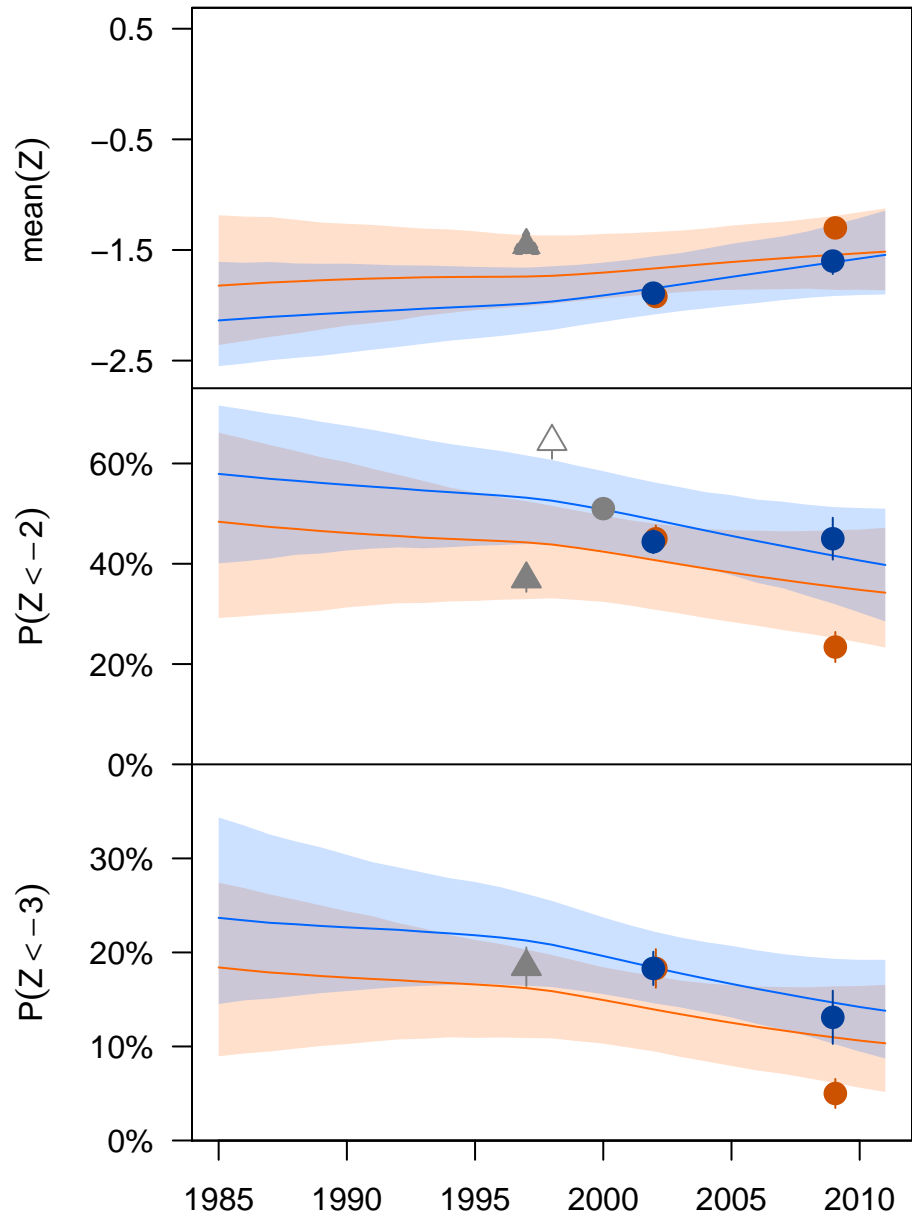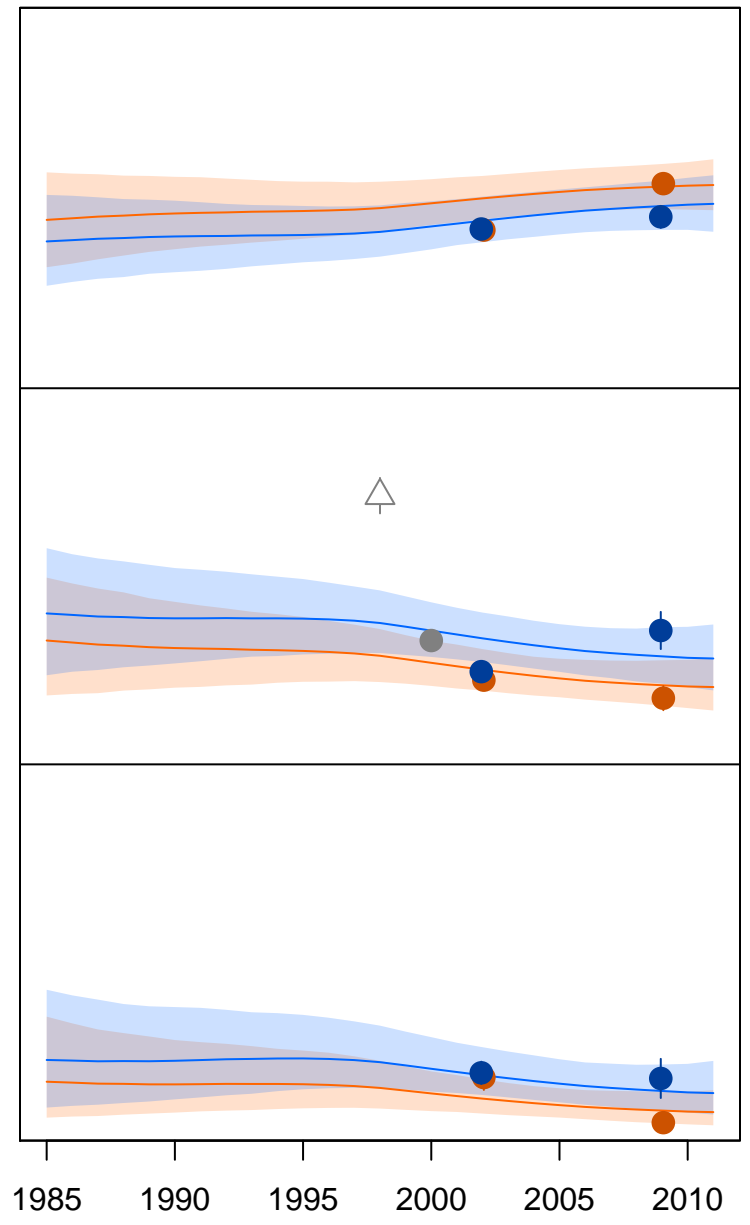

# Democratic Republic of the Congo

## Sub-Saharan Africa Region

### HAZ

### WAZ

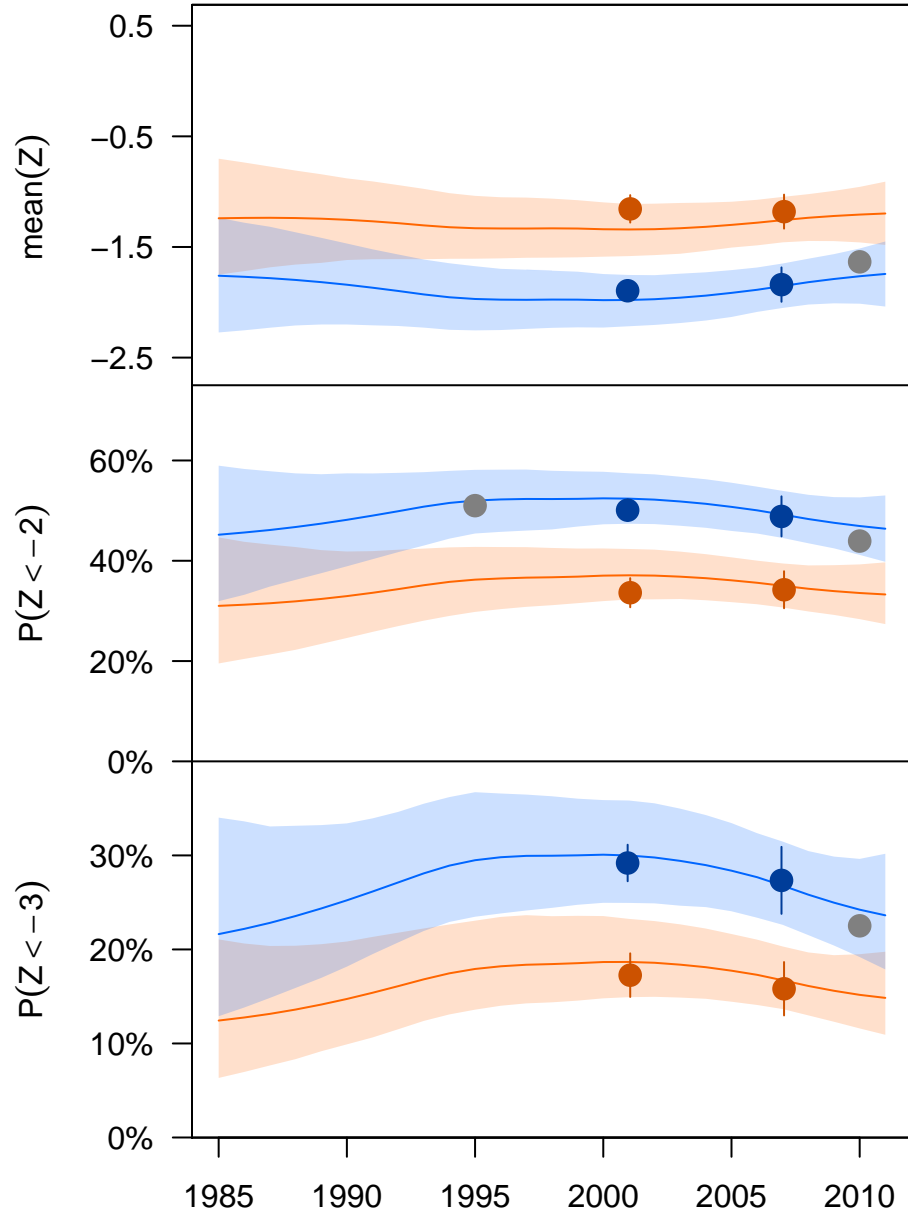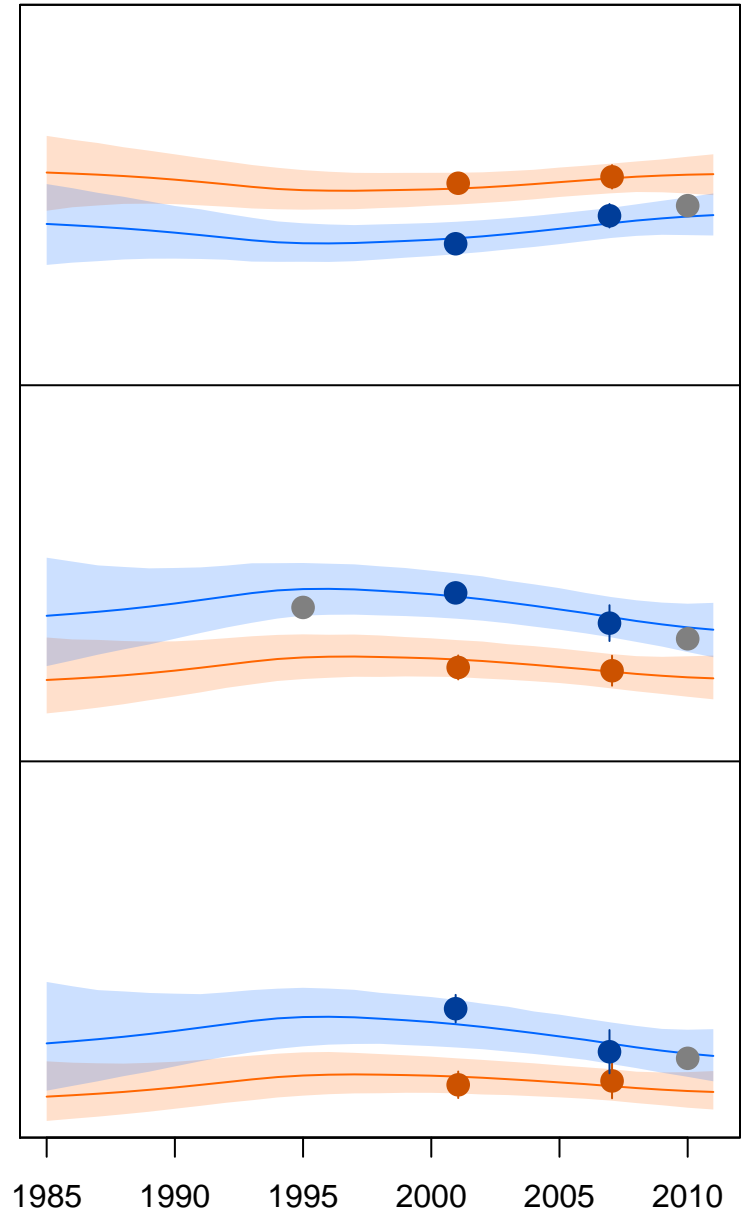

# Djibouti

## Sub-Saharan Africa Region

85

### HAZ

### WAZ

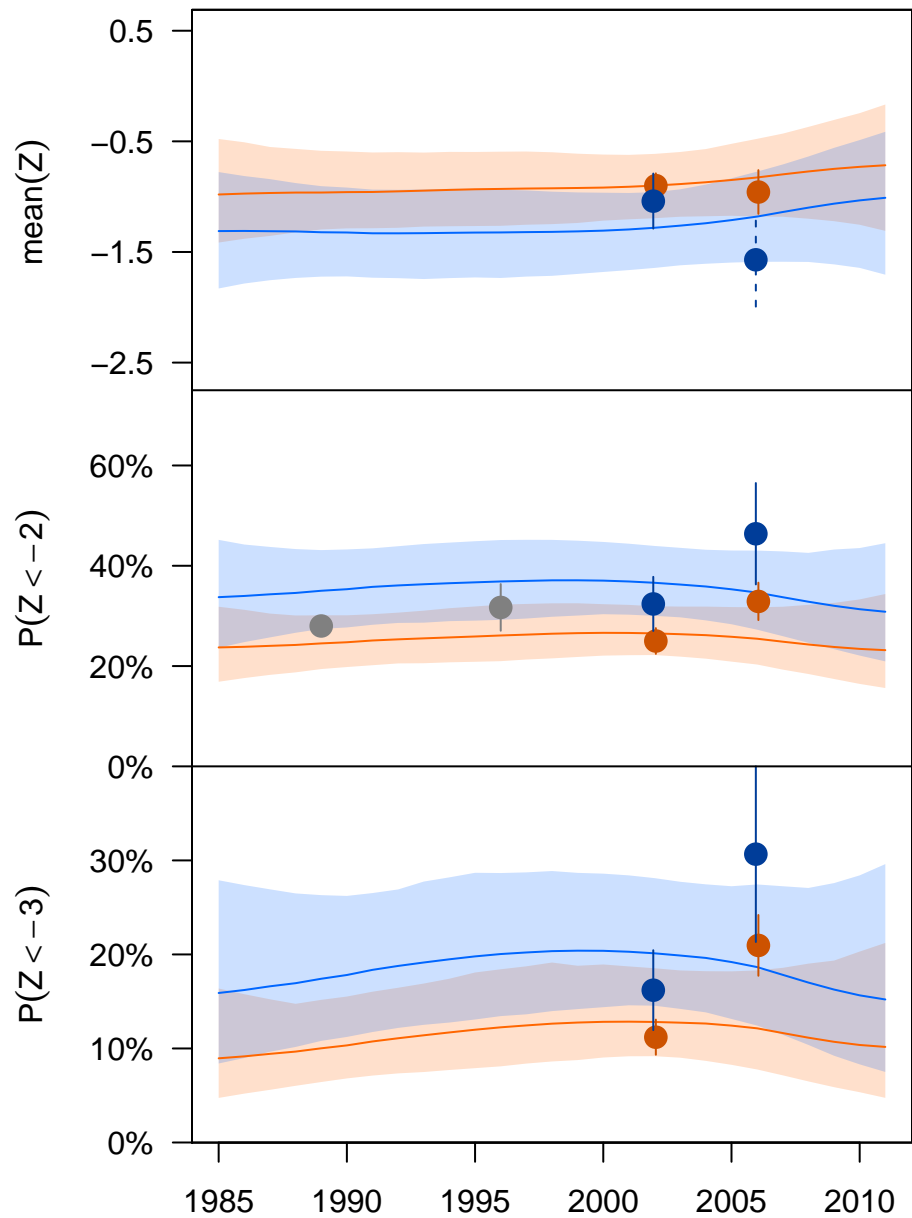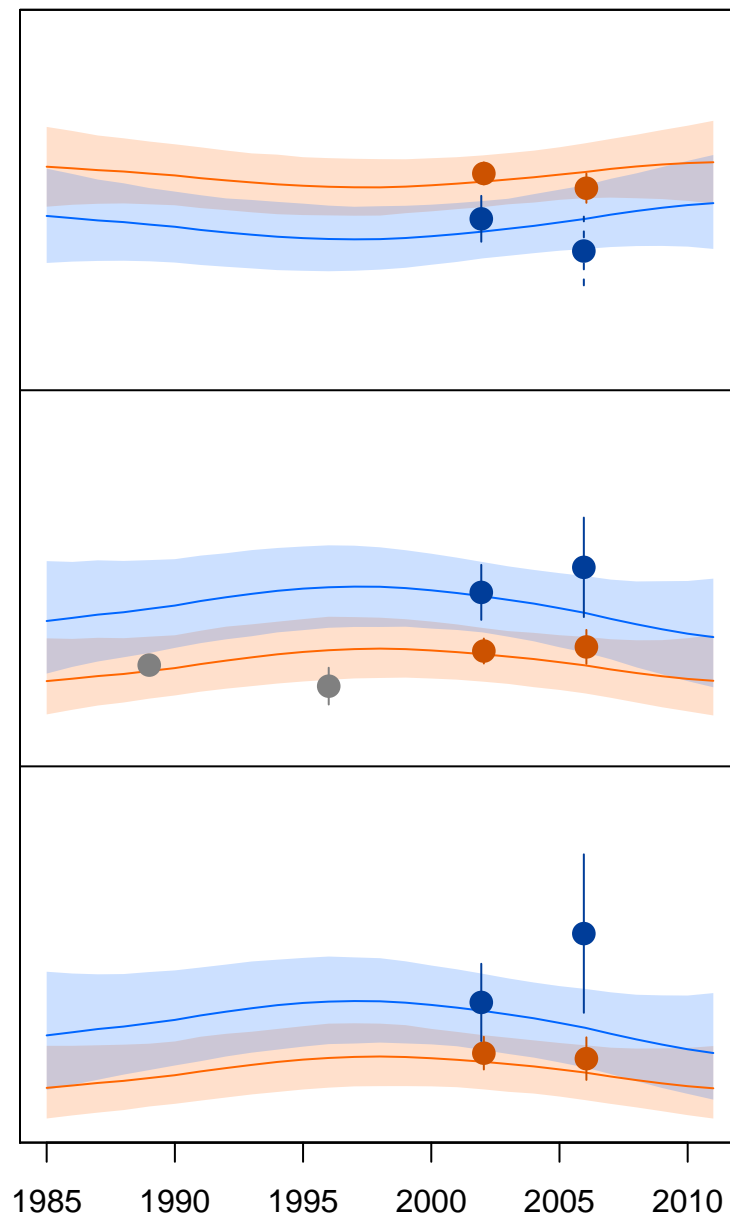

# Dominica

Andean and Central Latin America and Caribbean Region

86

## HAZ

## WAZ

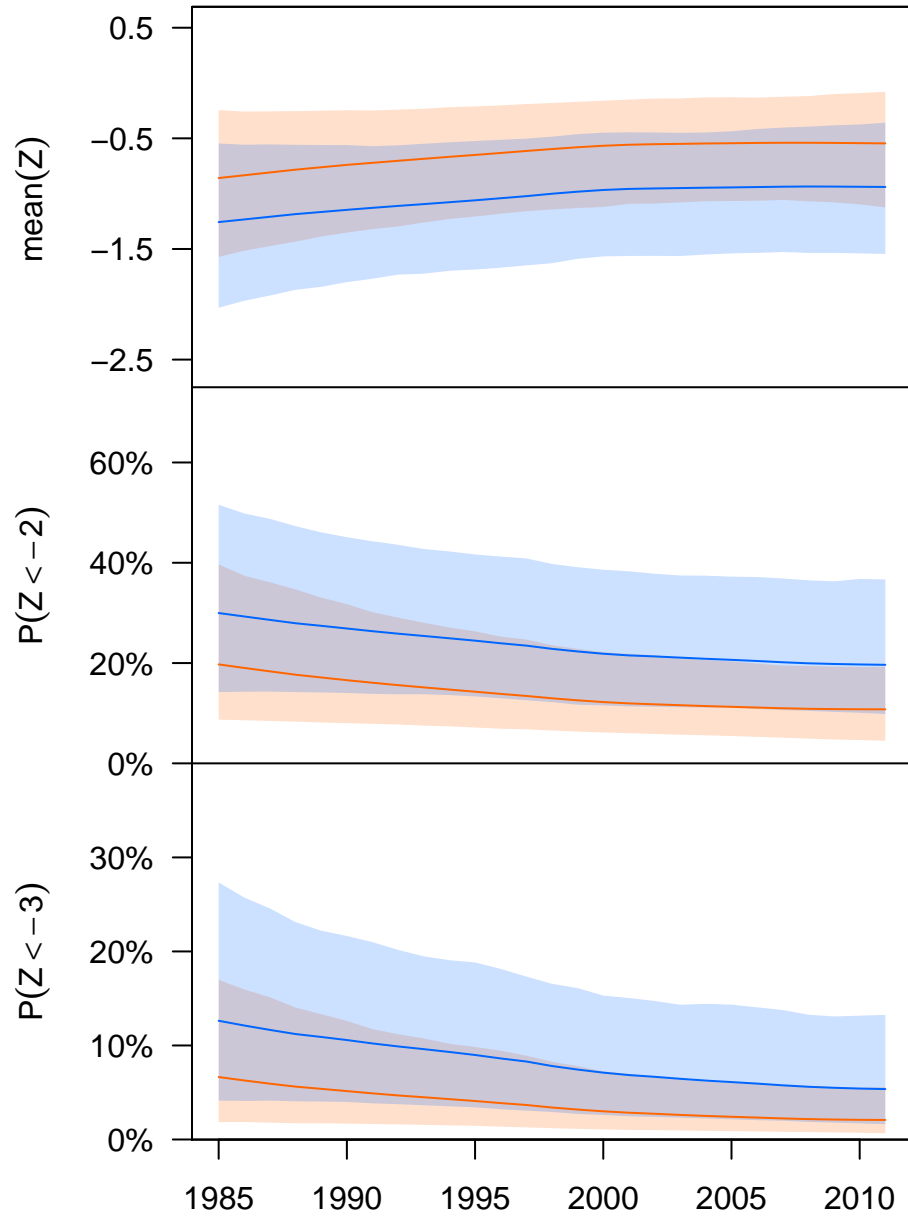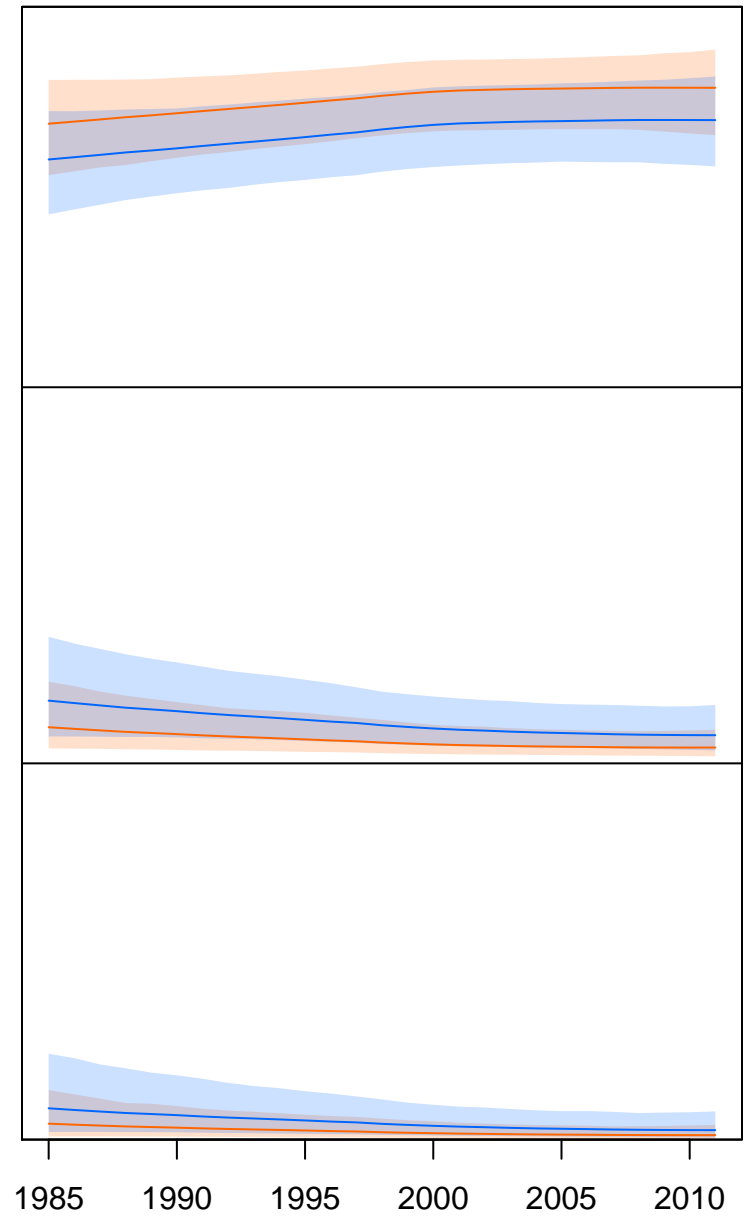

# Dominican Republic

## Andean and Central Latin America and Caribbean Region

HAZ

WAZ

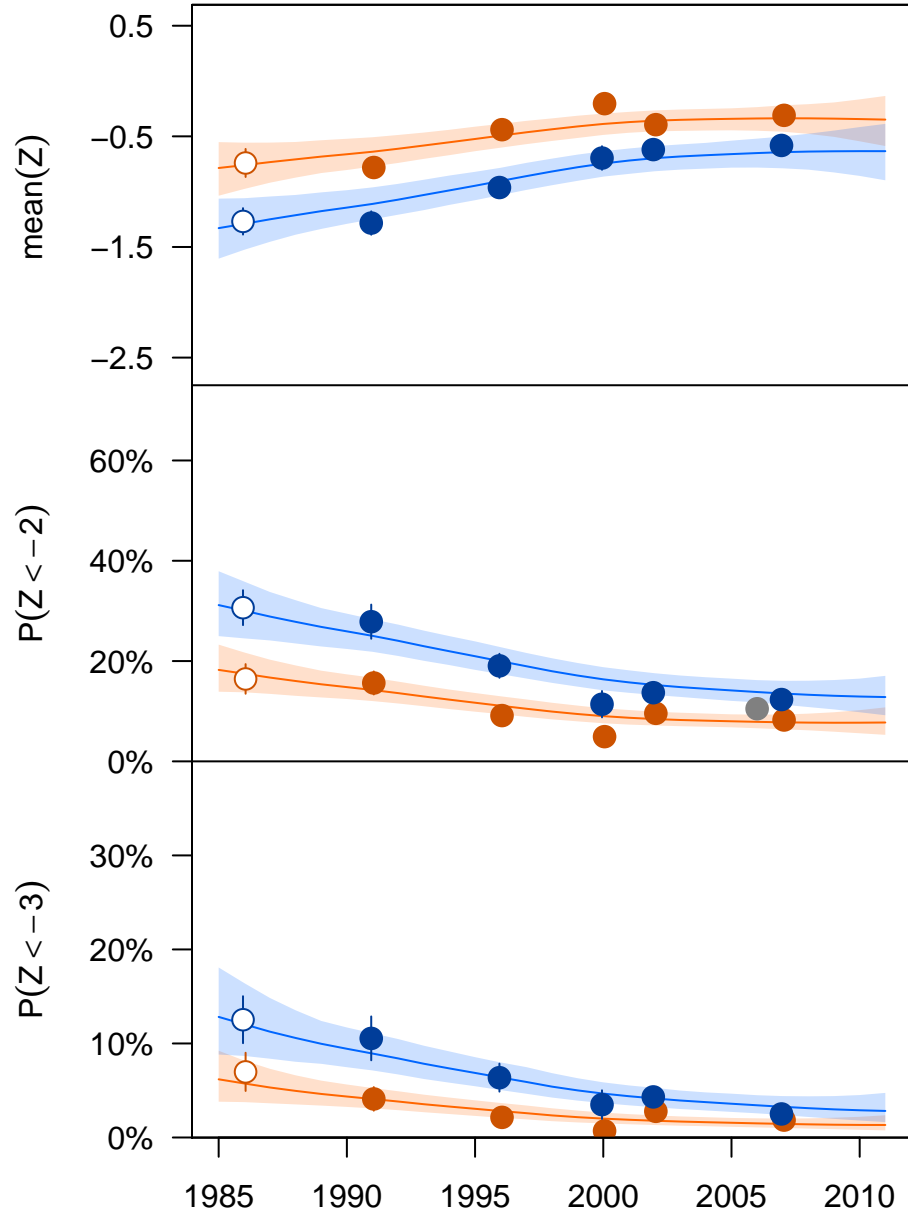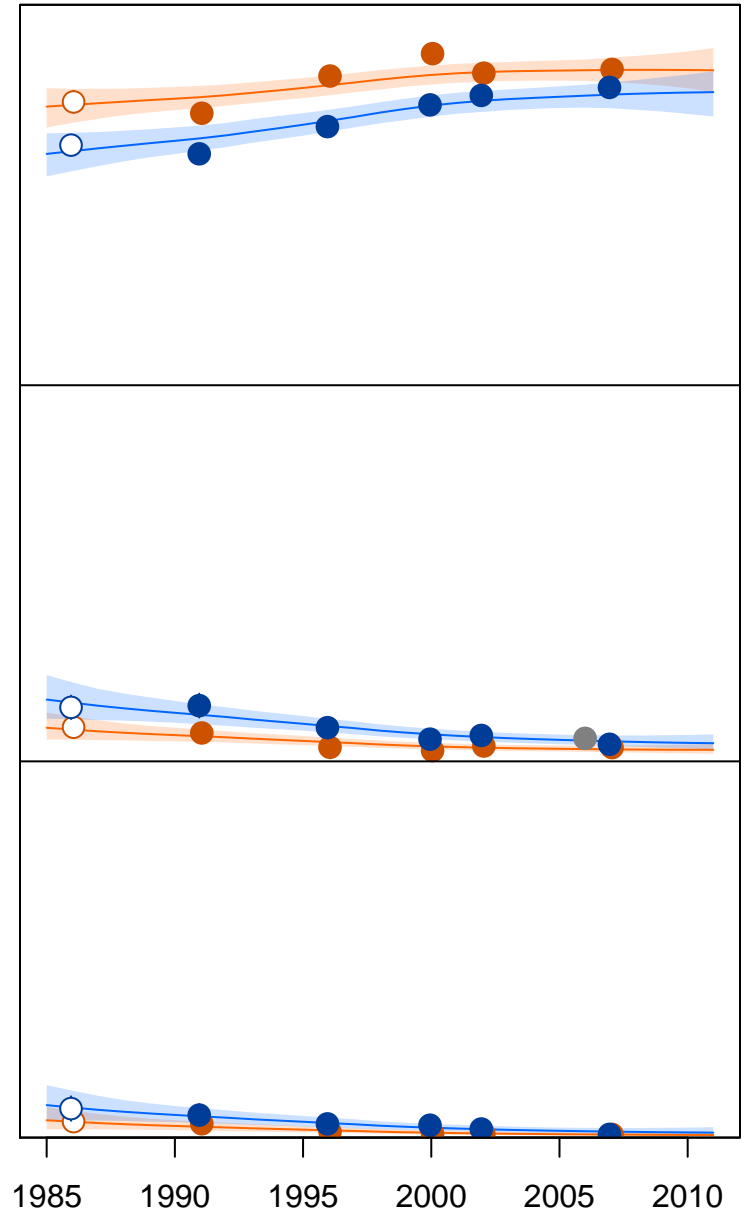



# Ecuador

Andean and Central Latin America and Caribbean Region

88

## HAZ

## WAZ

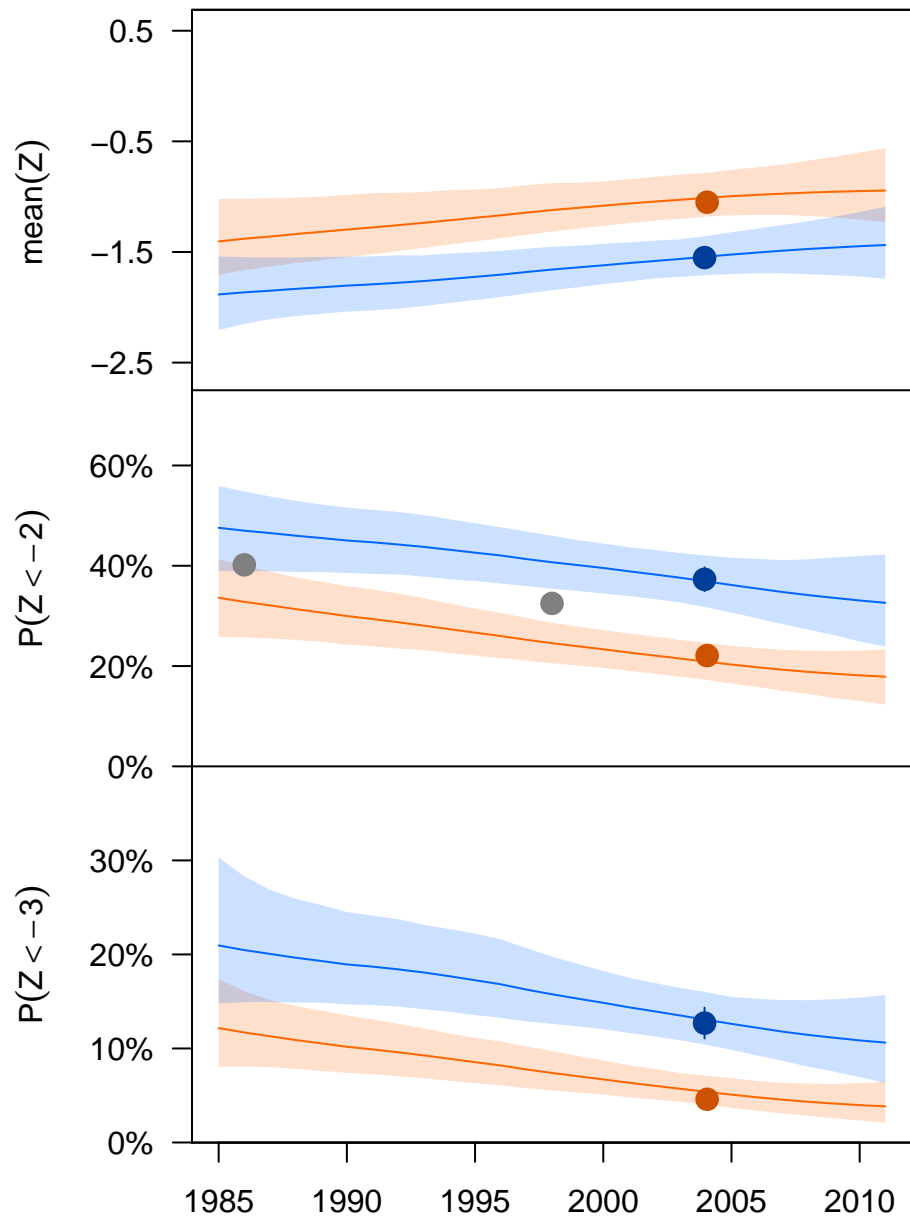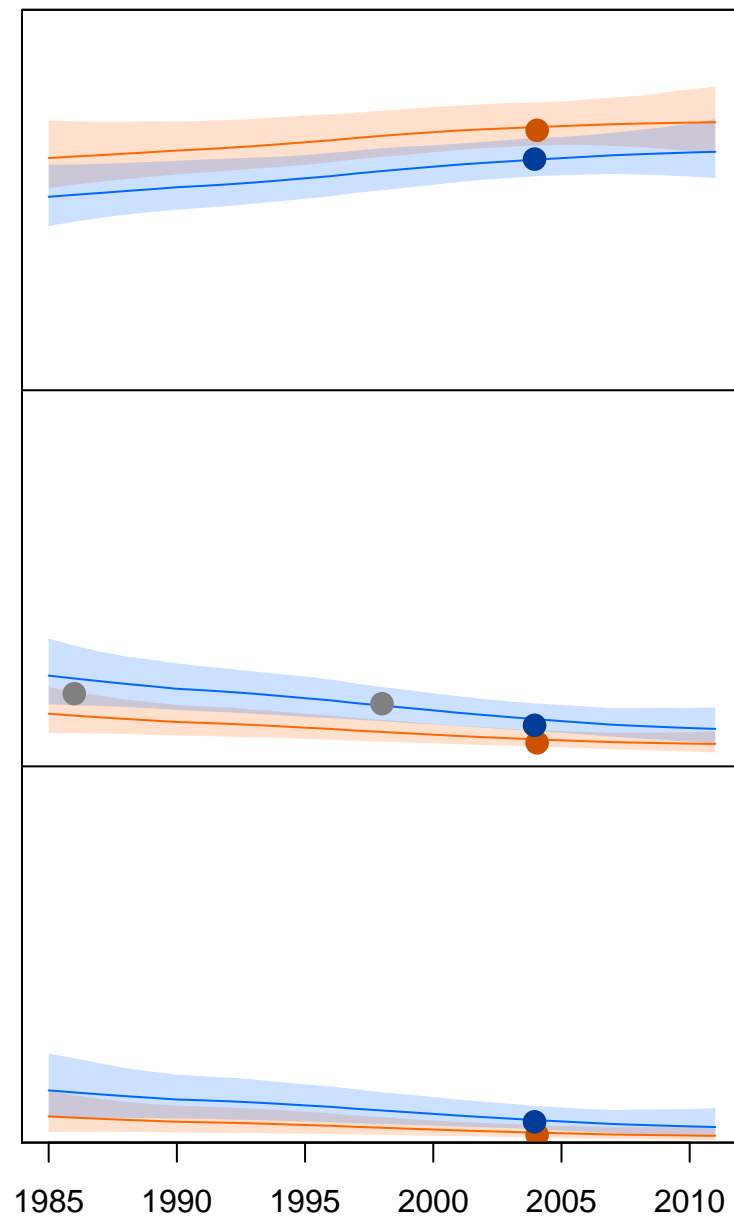

# Egypt

Central Asia, Middle East, and North Africa Region

### HAZ

### WAZ

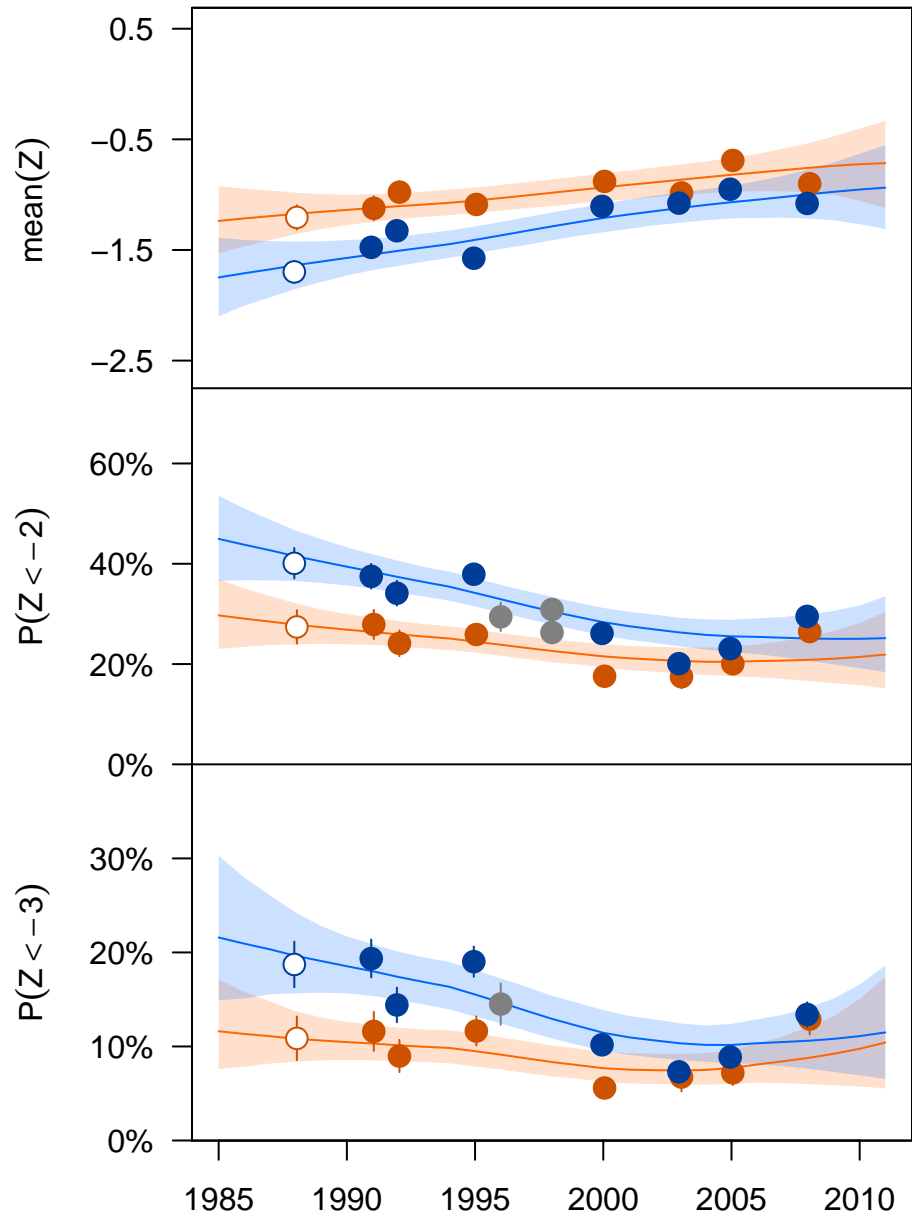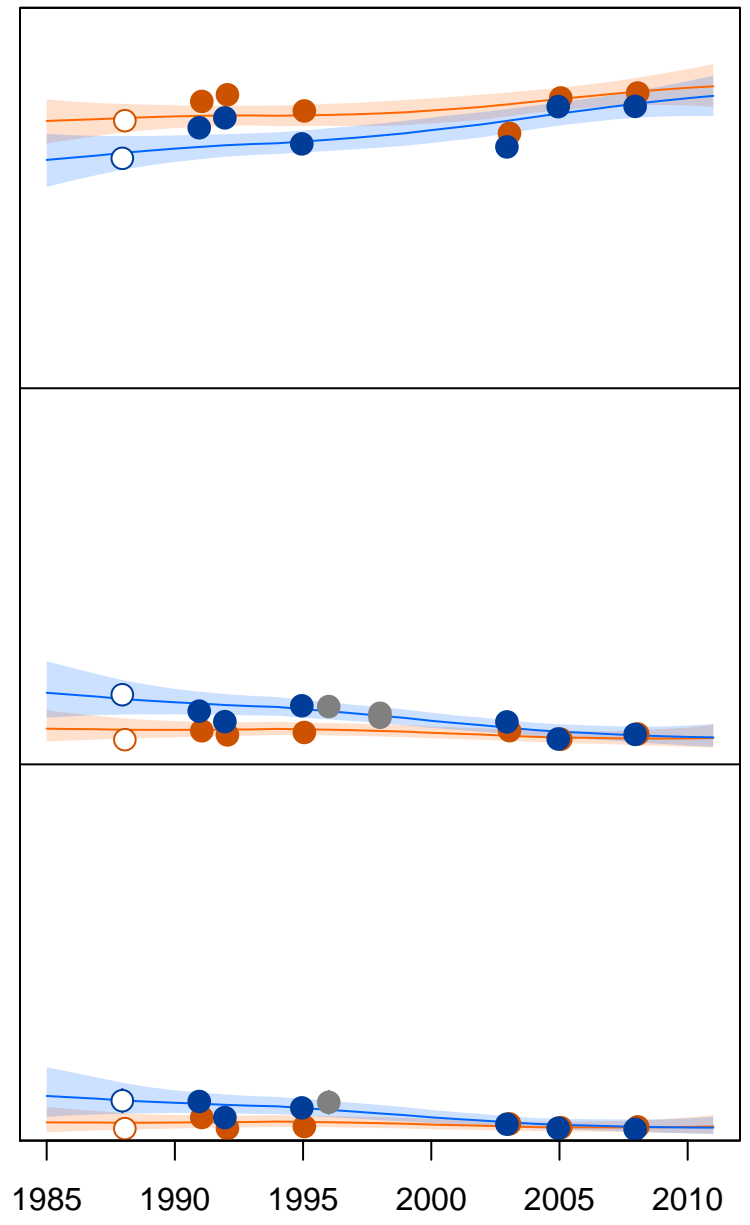

# El Salvador

Andean and Central Latin America and Caribbean Region

### HAZ

### WAZ

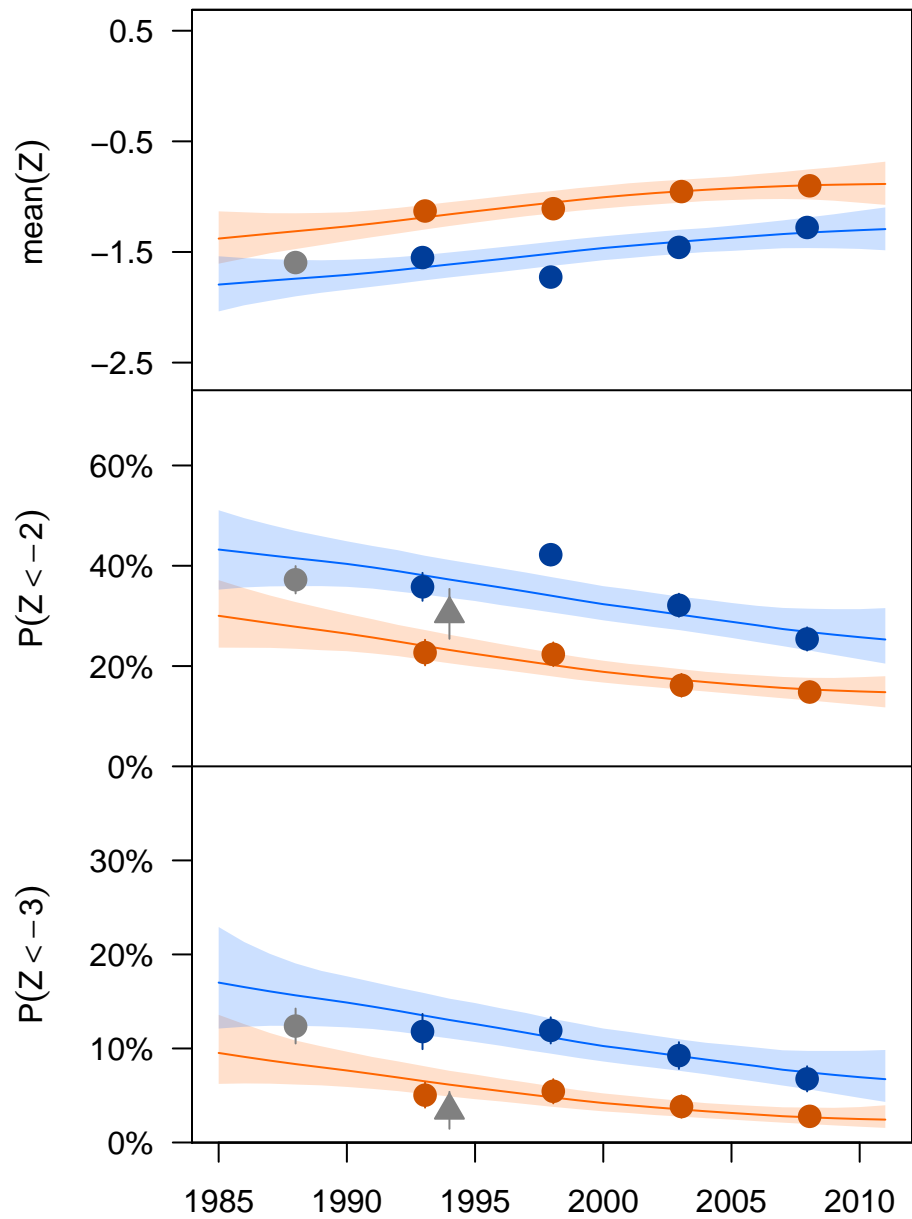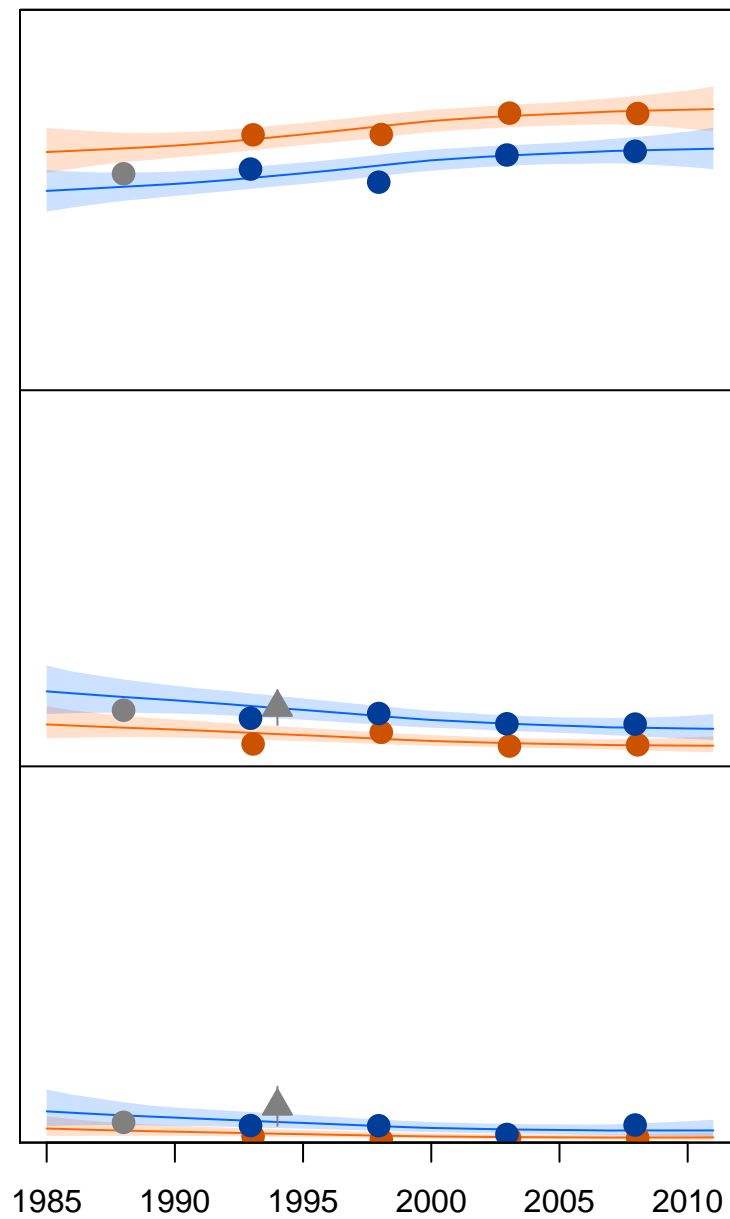

# Equatorial Guinea

## Sub-Saharan Africa Region

HAZ

WAZ

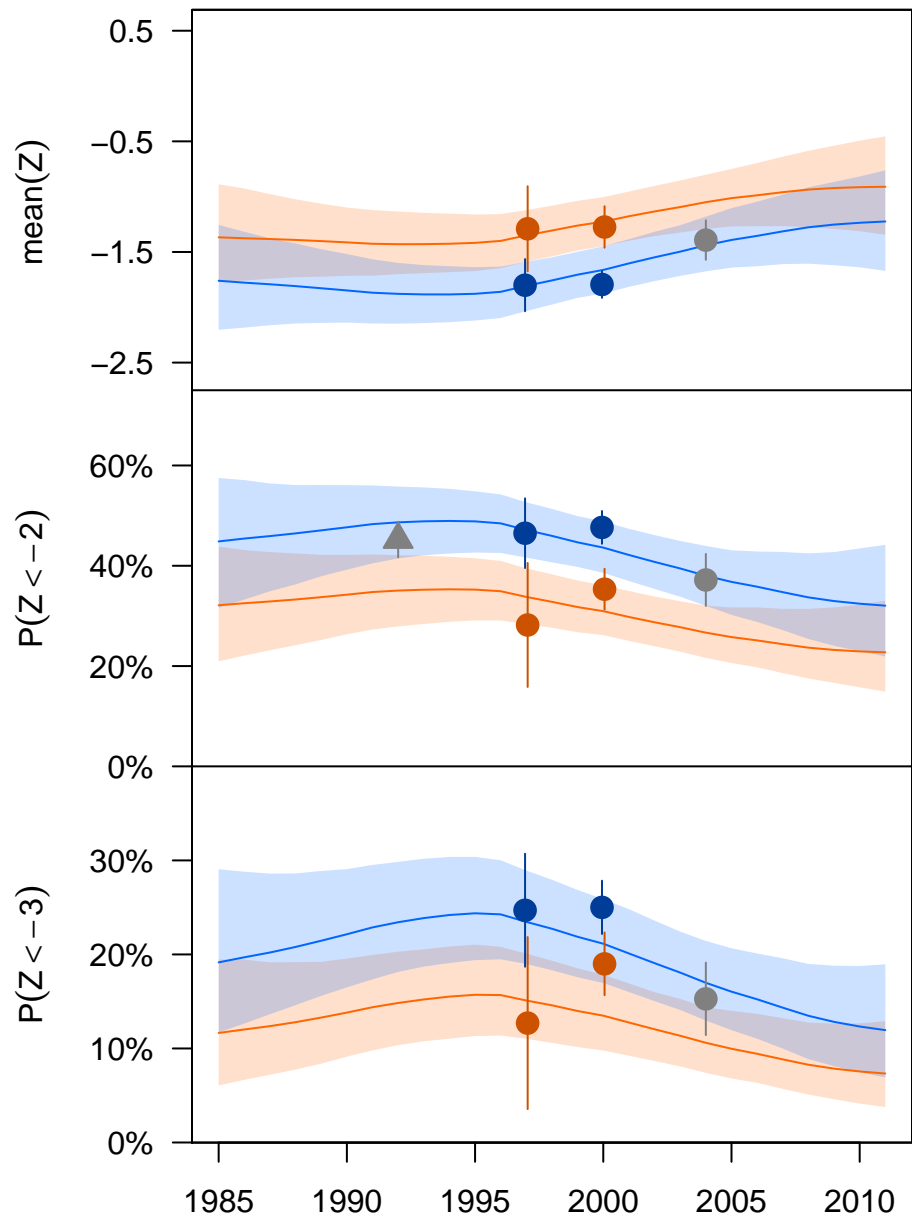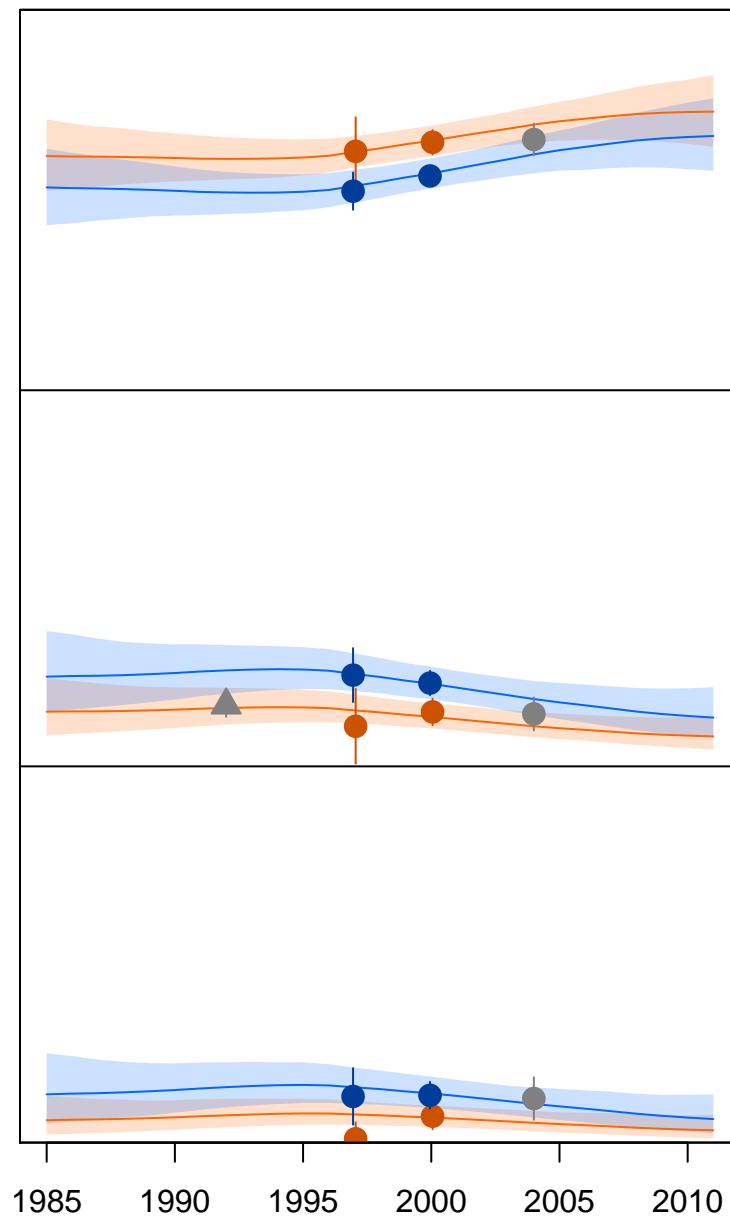

# Eritrea

## Sub-Saharan Africa Region

### HAZ

### WAZ

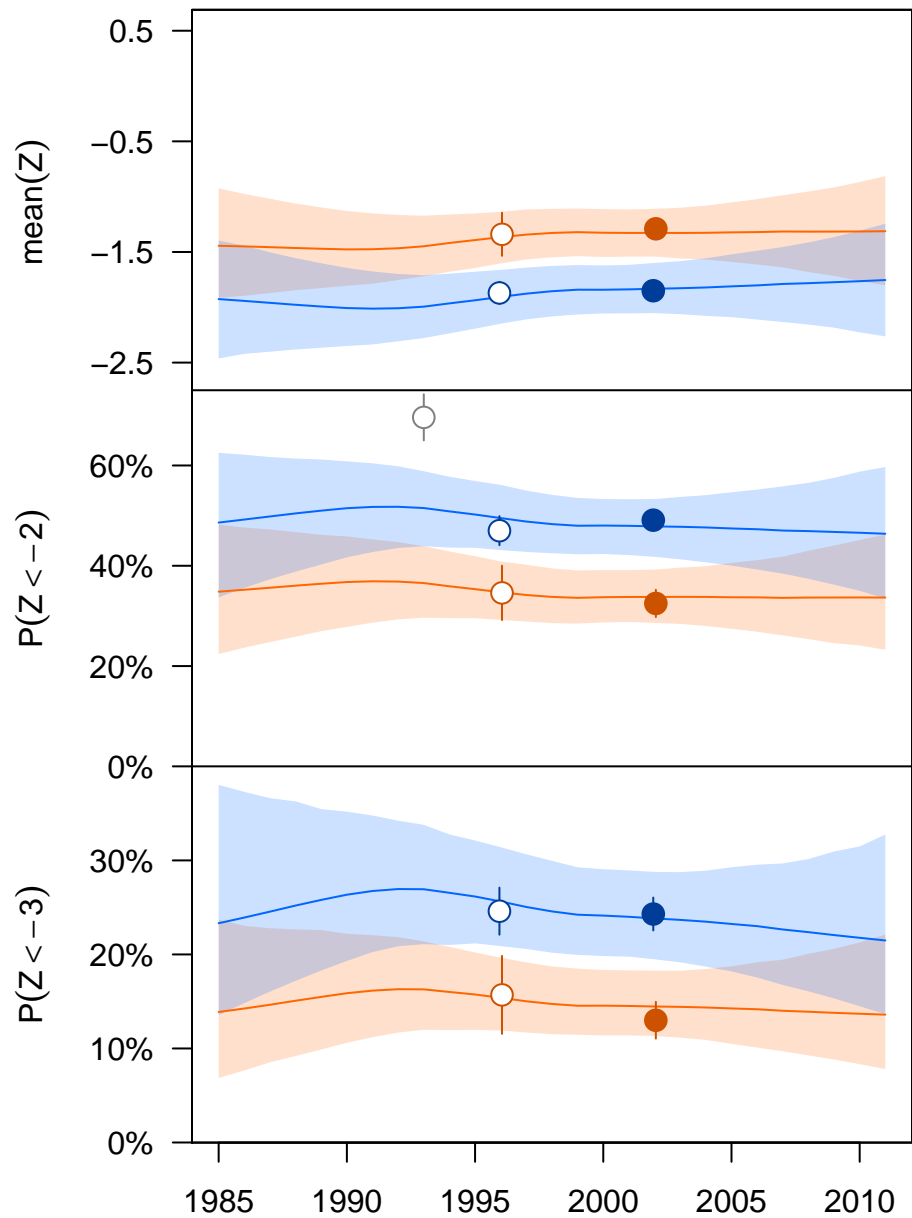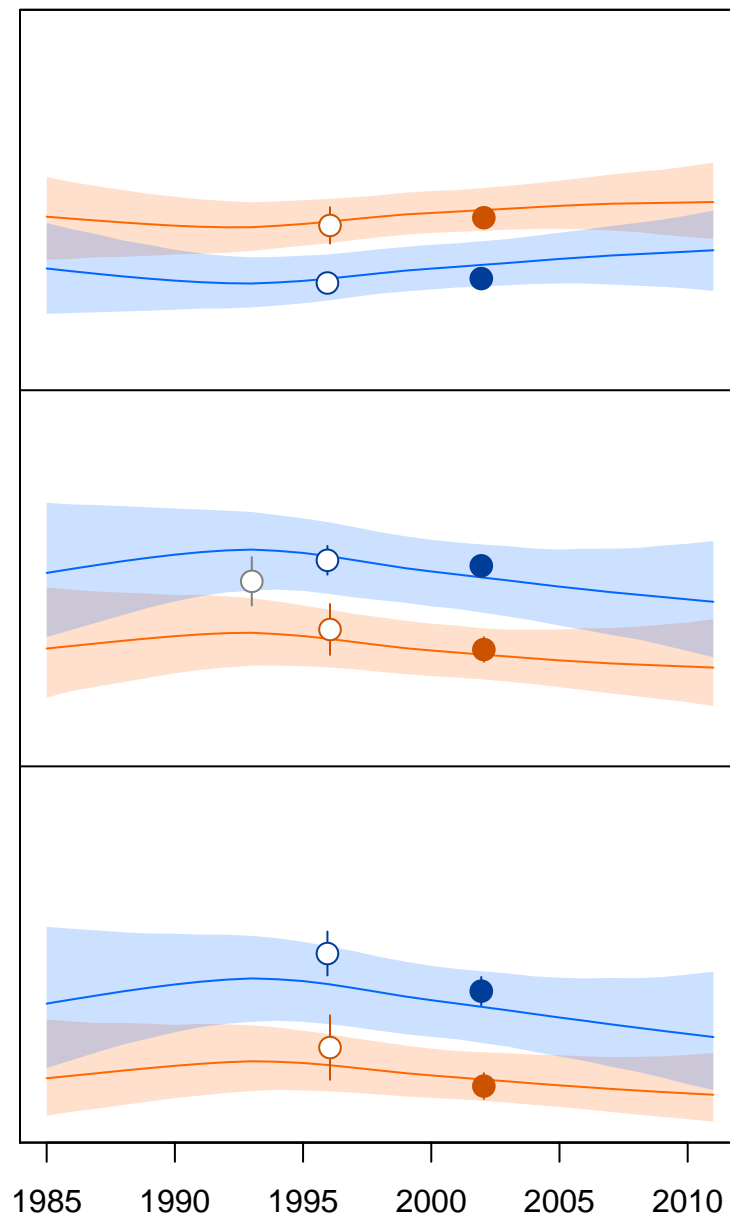

# Ethiopia

## Sub-Saharan Africa Region

### HAZ

### WAZ

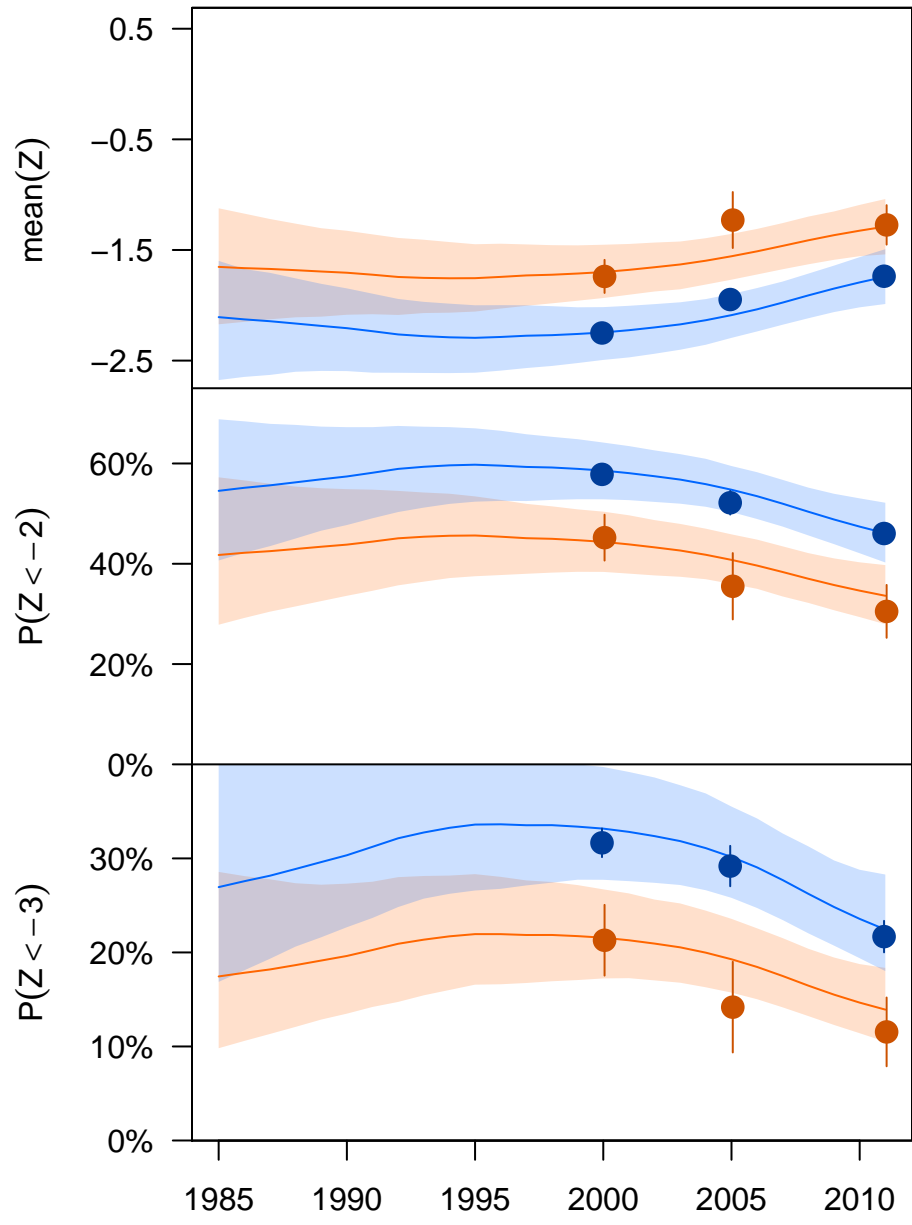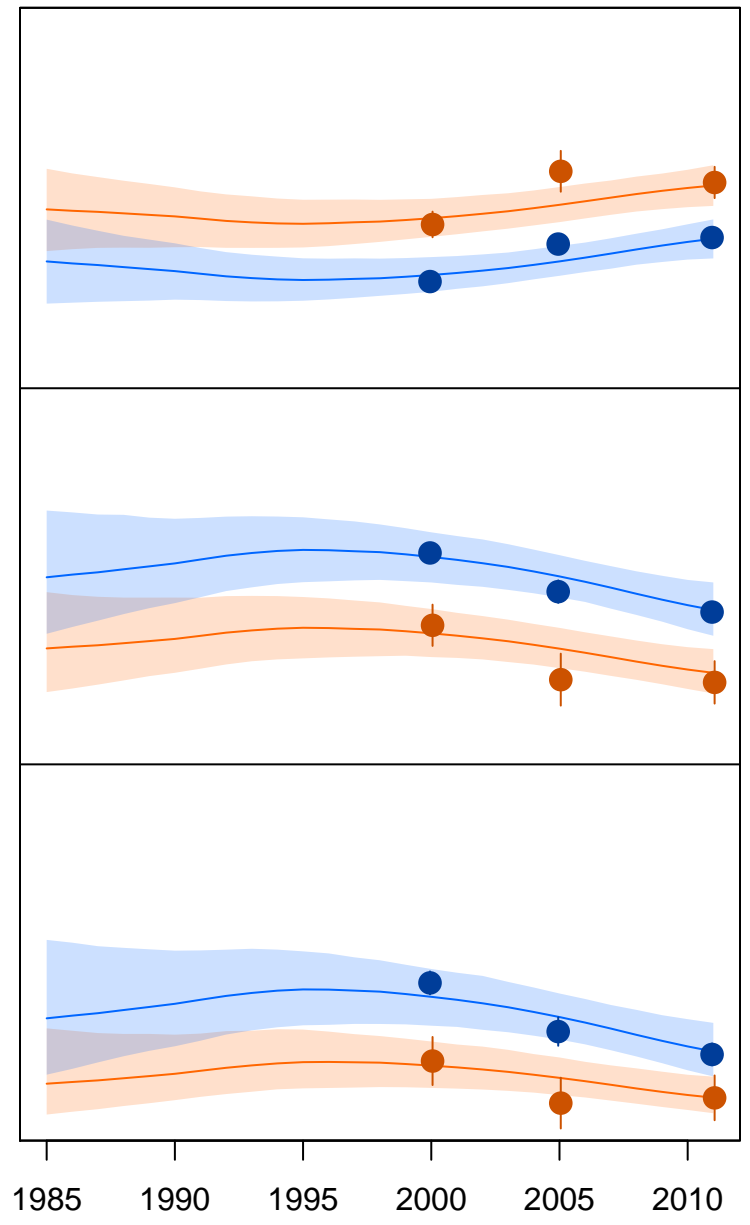

HAZ

WAZ

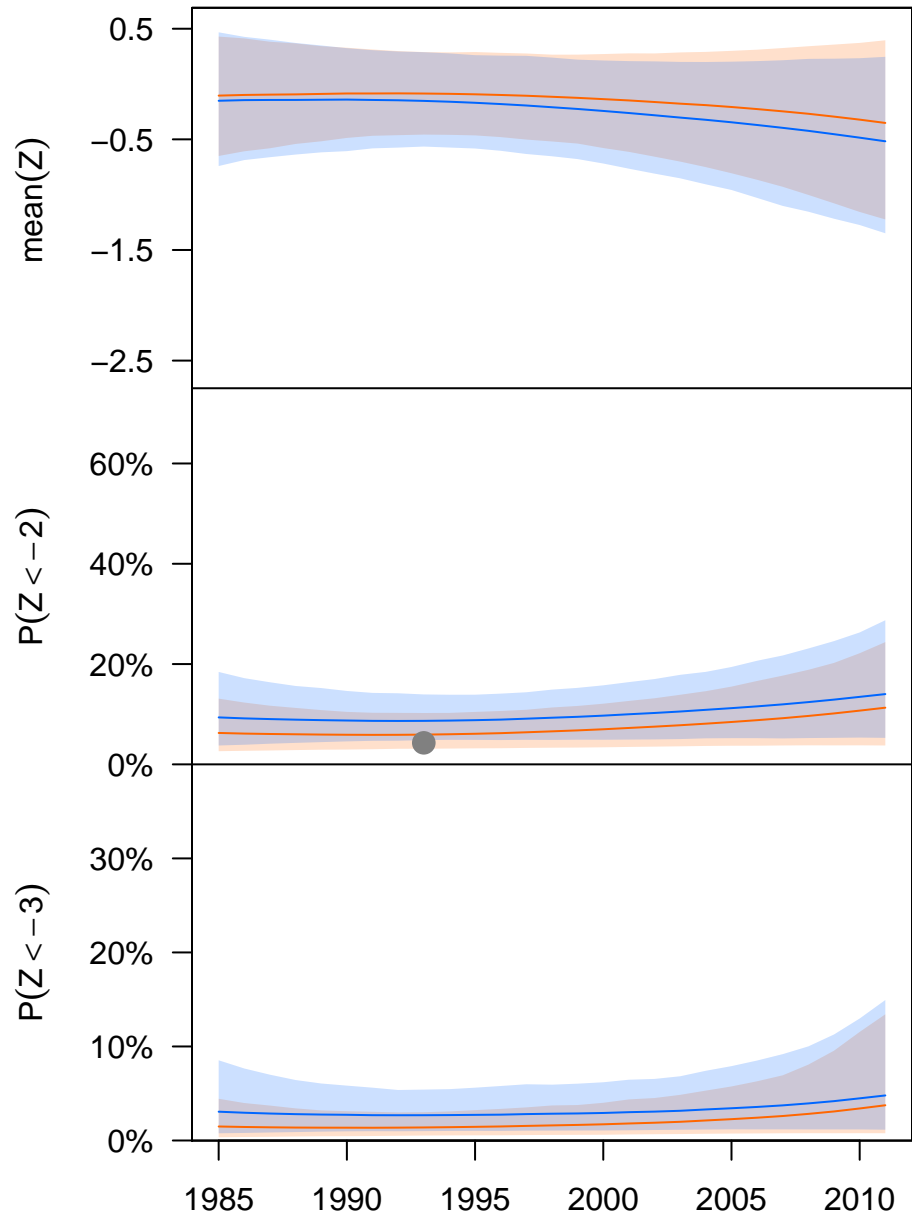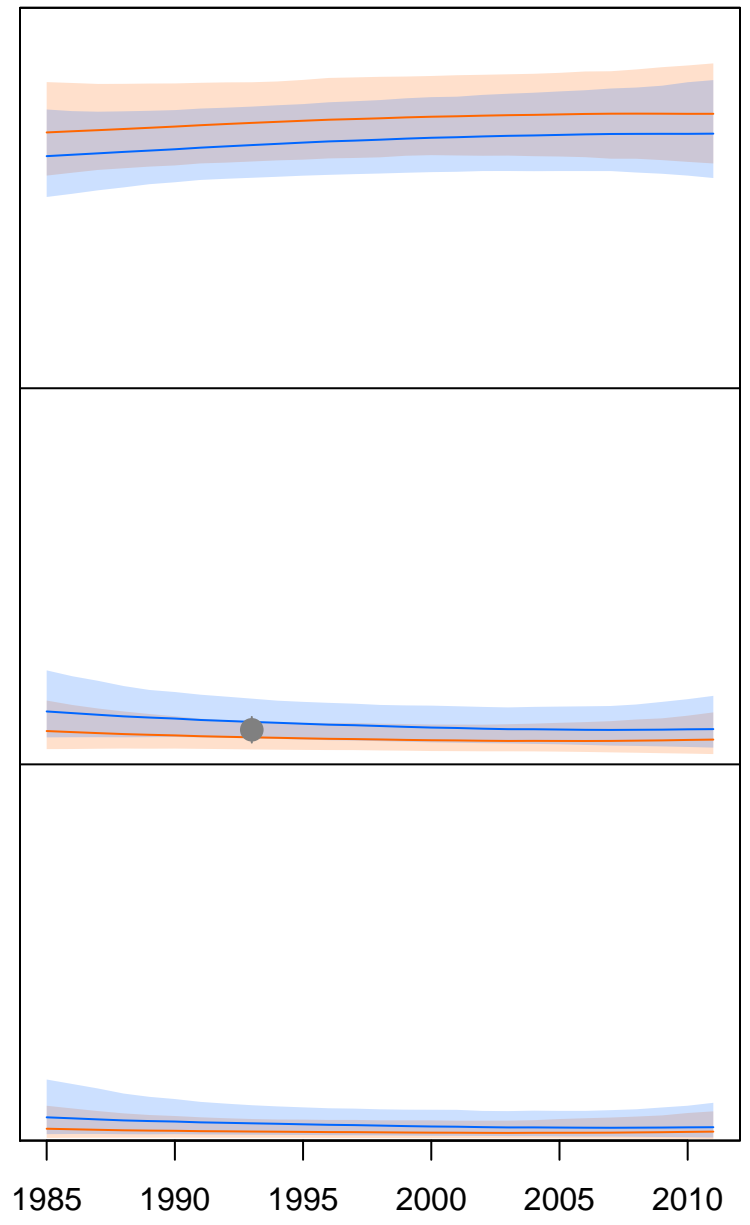

# Gabon

## Sub-Saharan Africa Region

95

### HAZ

### WAZ

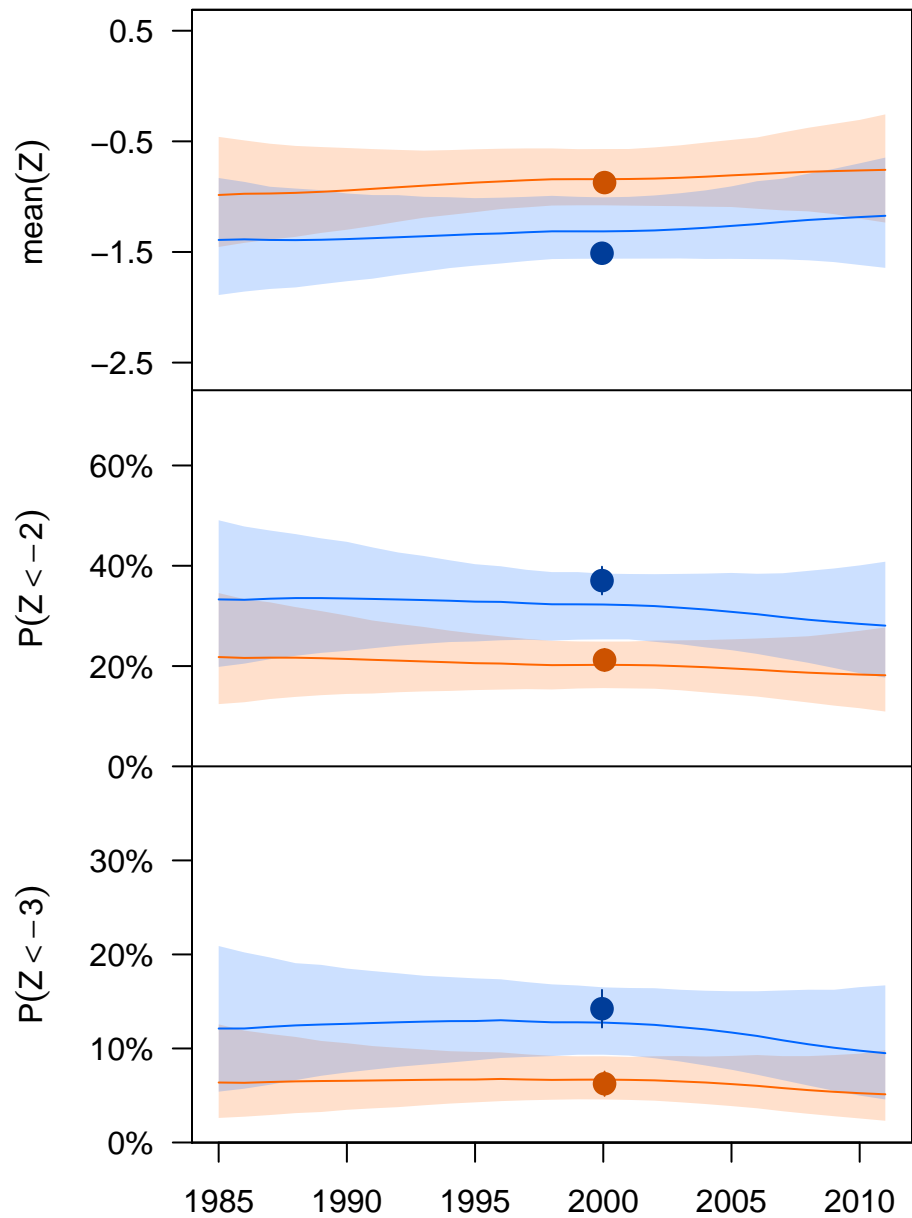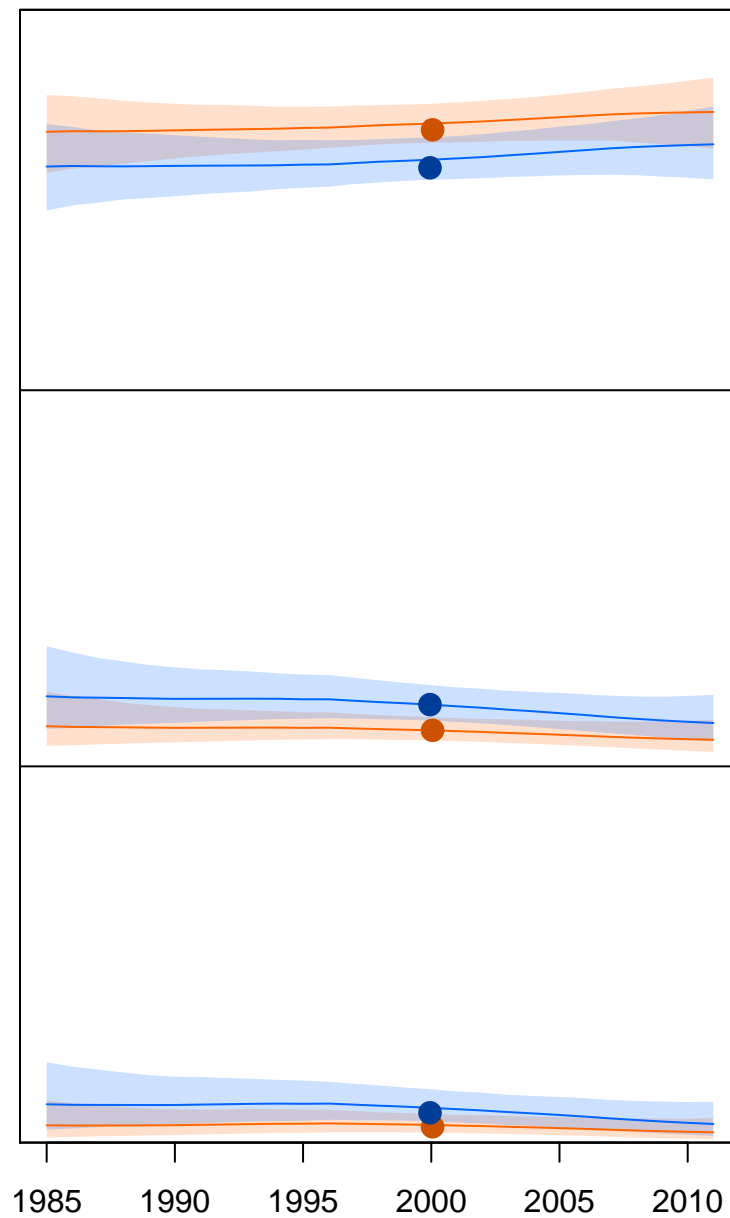



# Gambia

## Sub-Saharan Africa Region

### HAZ

### WAZ

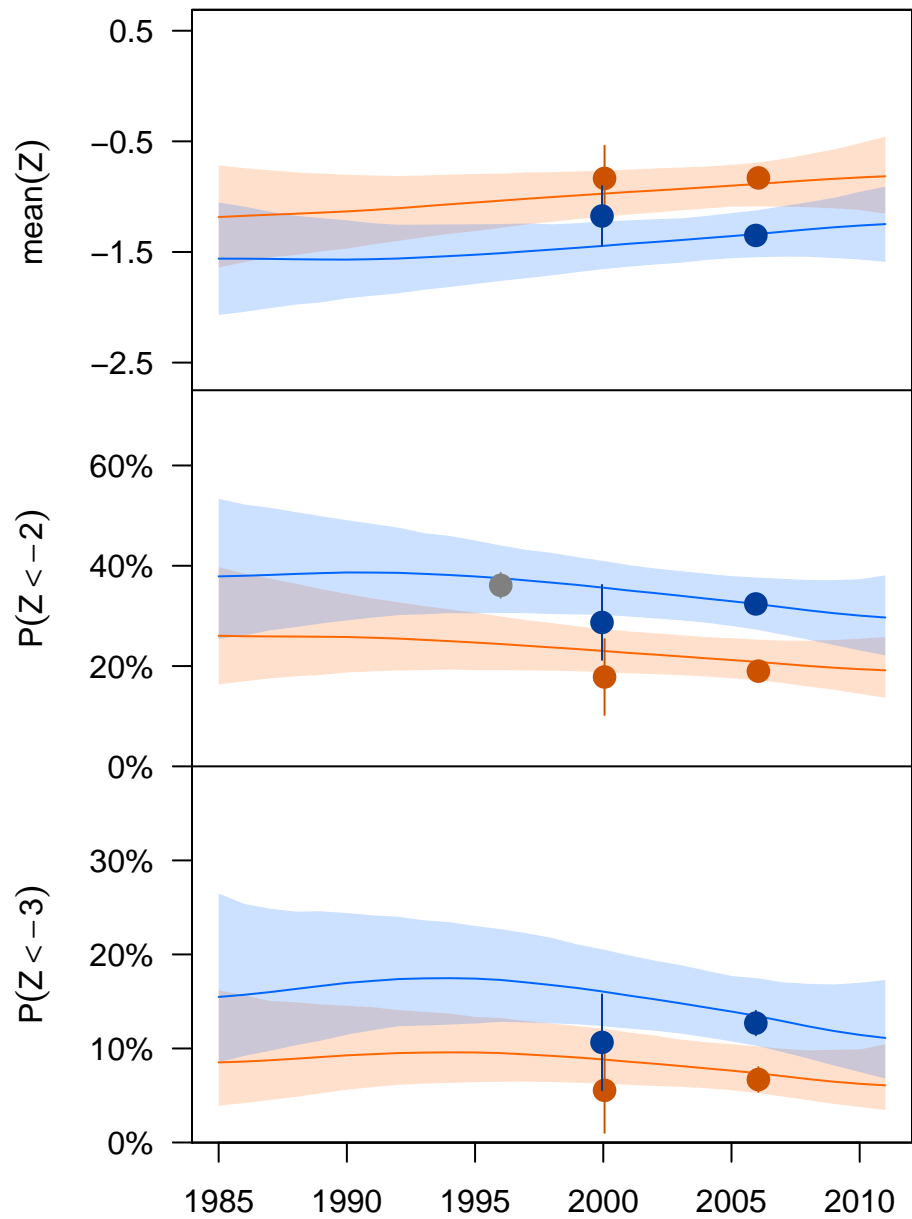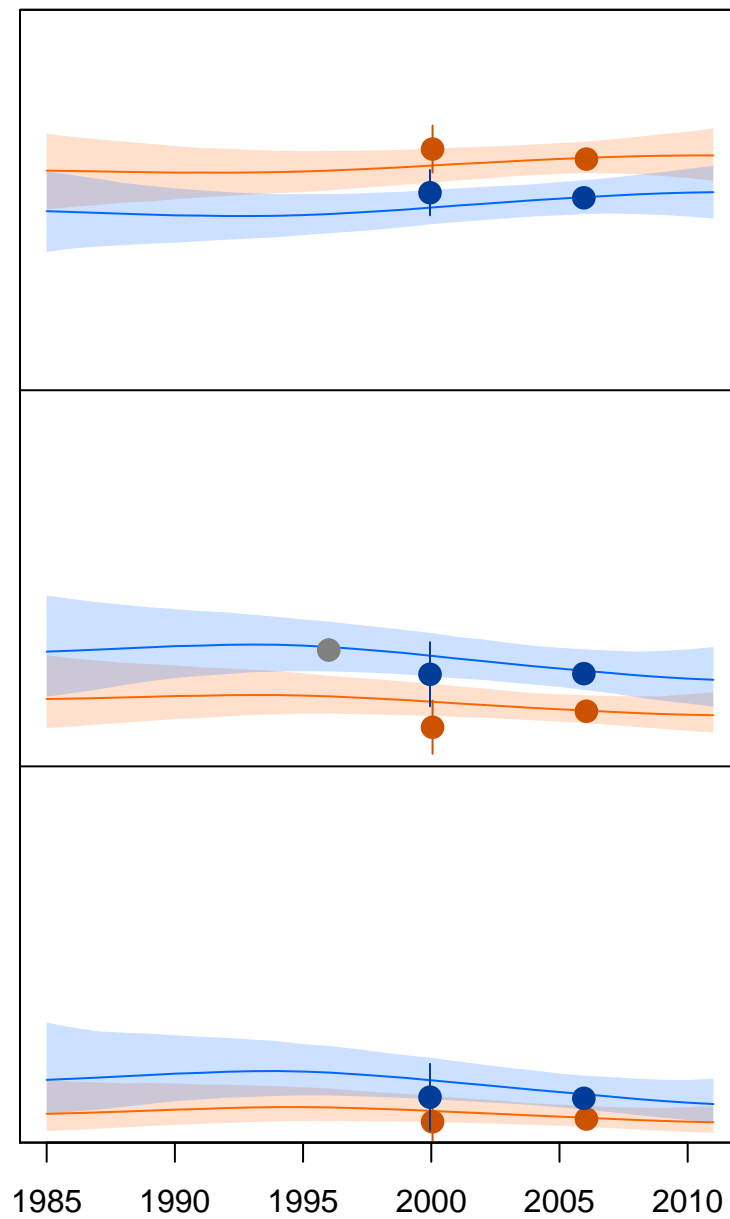

# Georgia

## Central Asia, Middle East, and North Africa Region

### HAZ

### WAZ

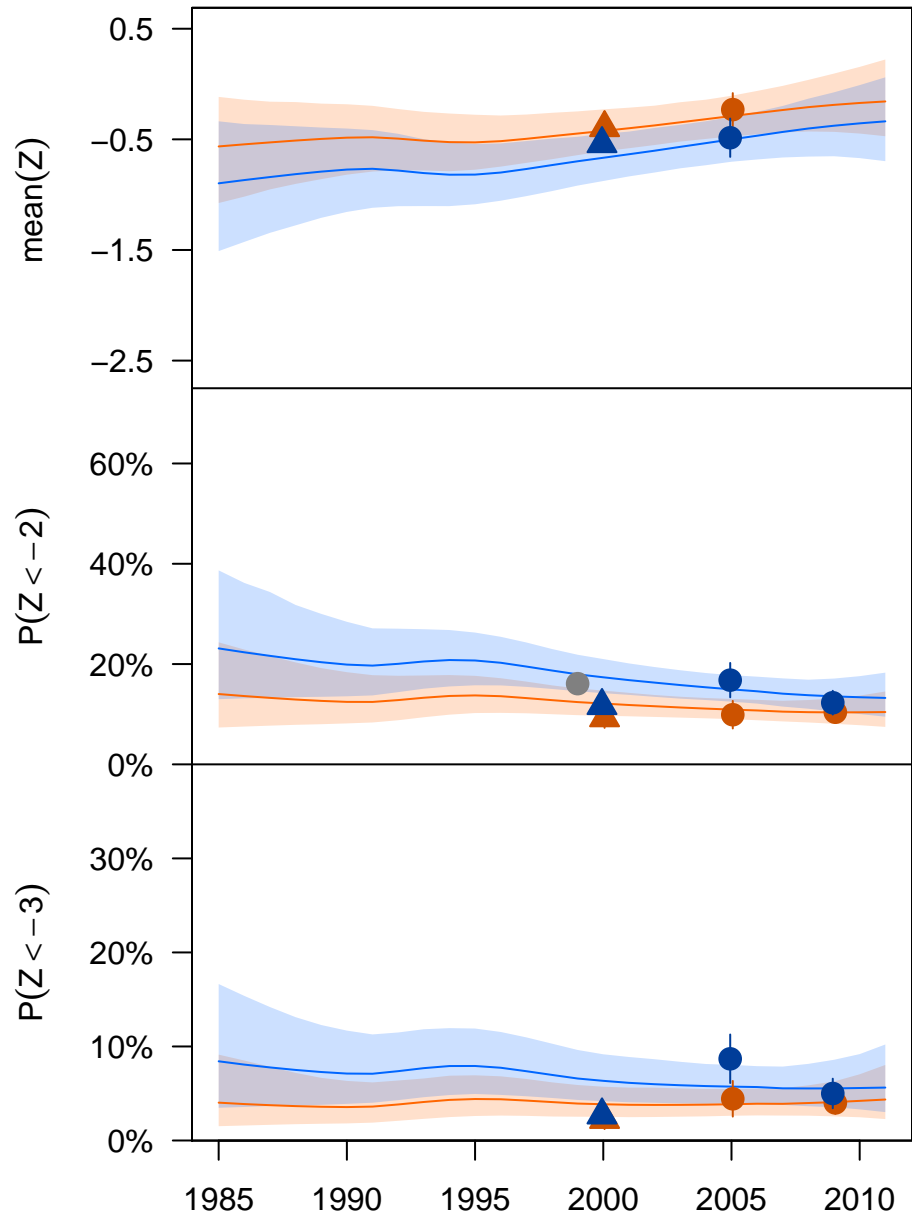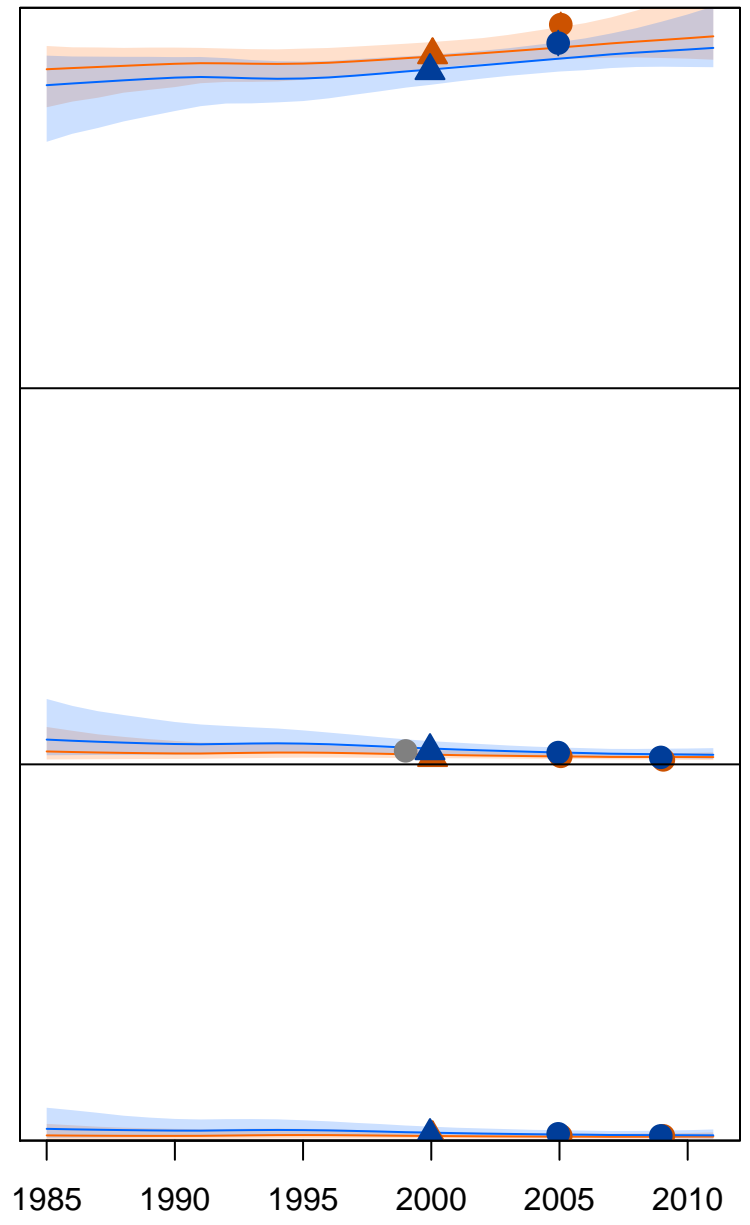

# Ghana

## Sub-Saharan Africa Region

### HAZ

### WAZ

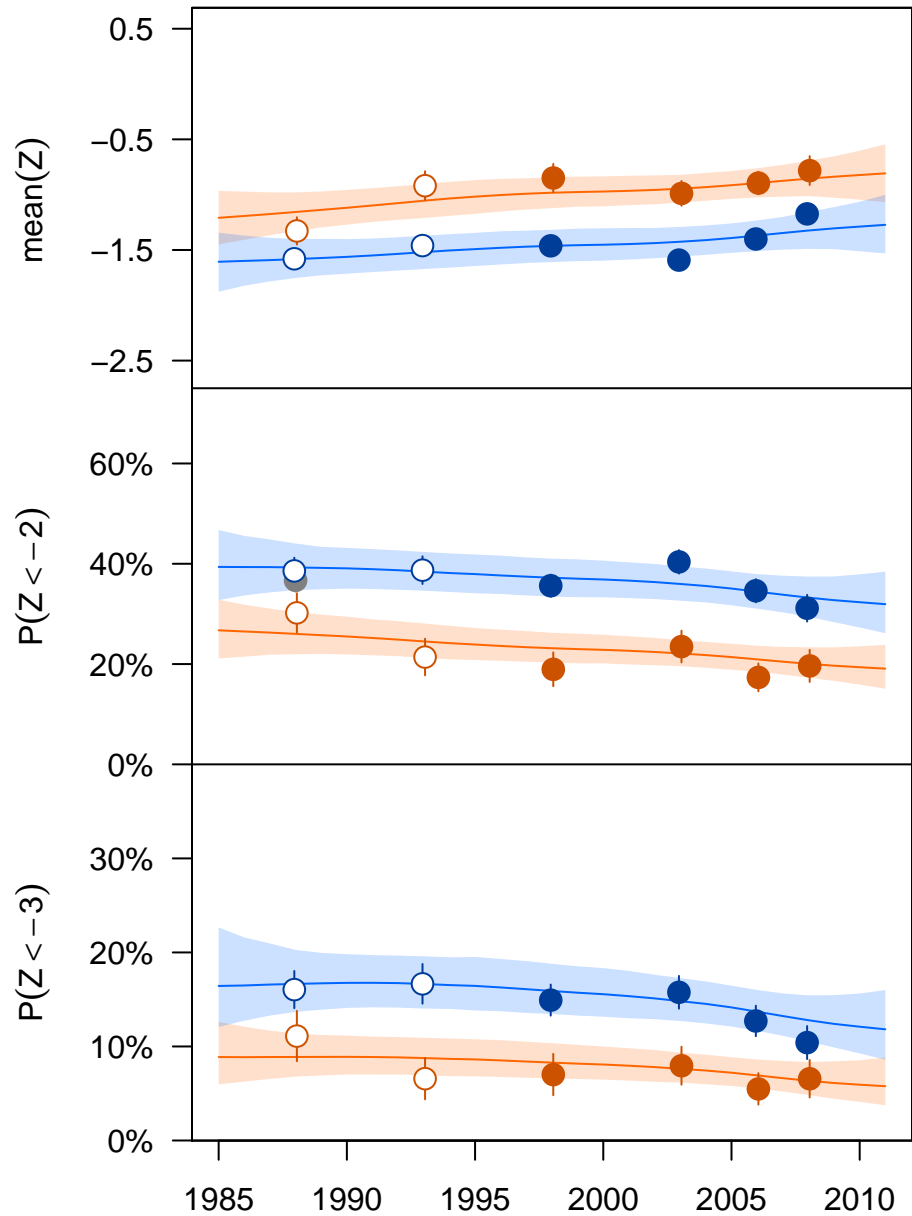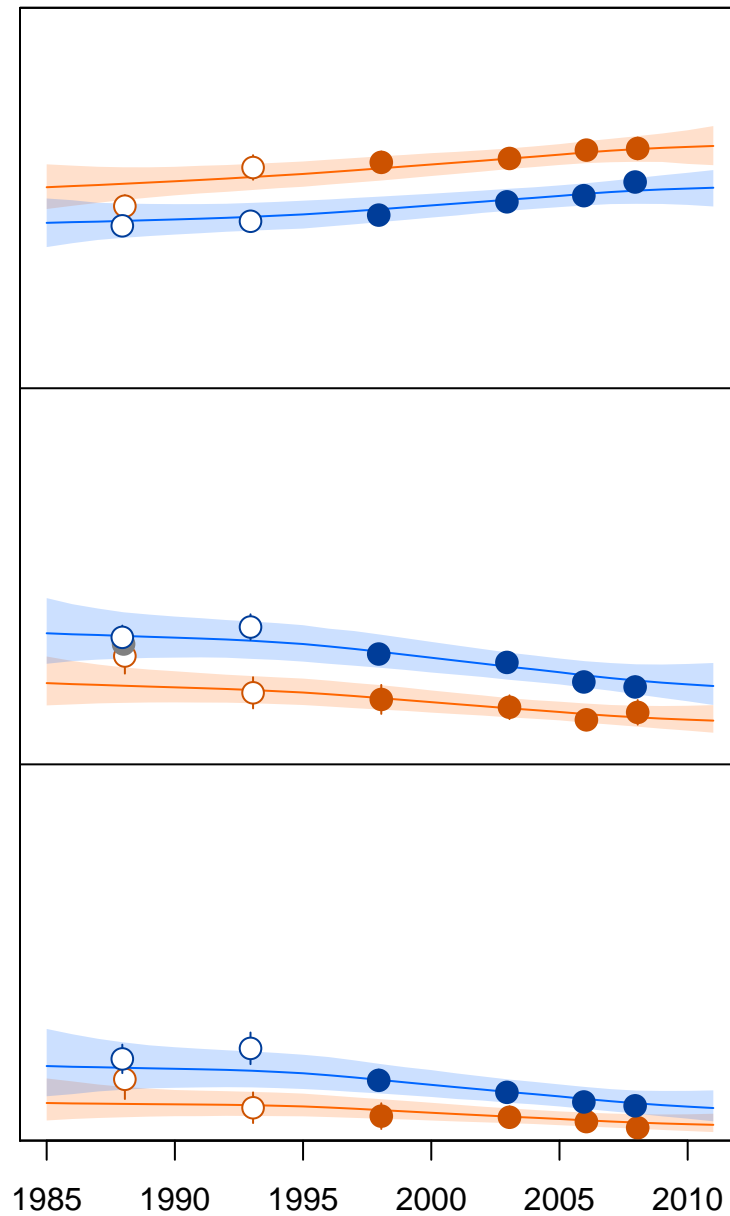

# Grenada

Andean and Central Latin America and Caribbean Region

99

## HAZ

## WAZ

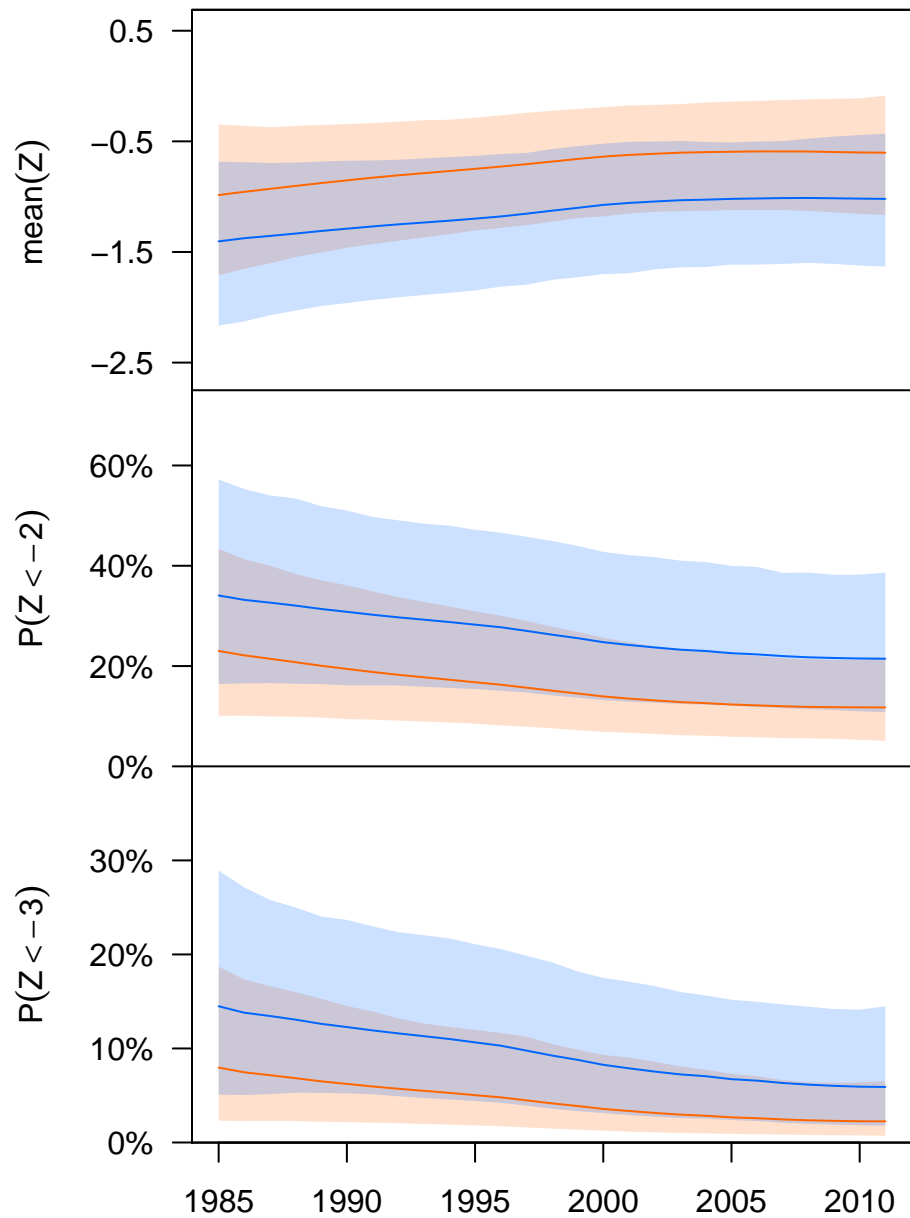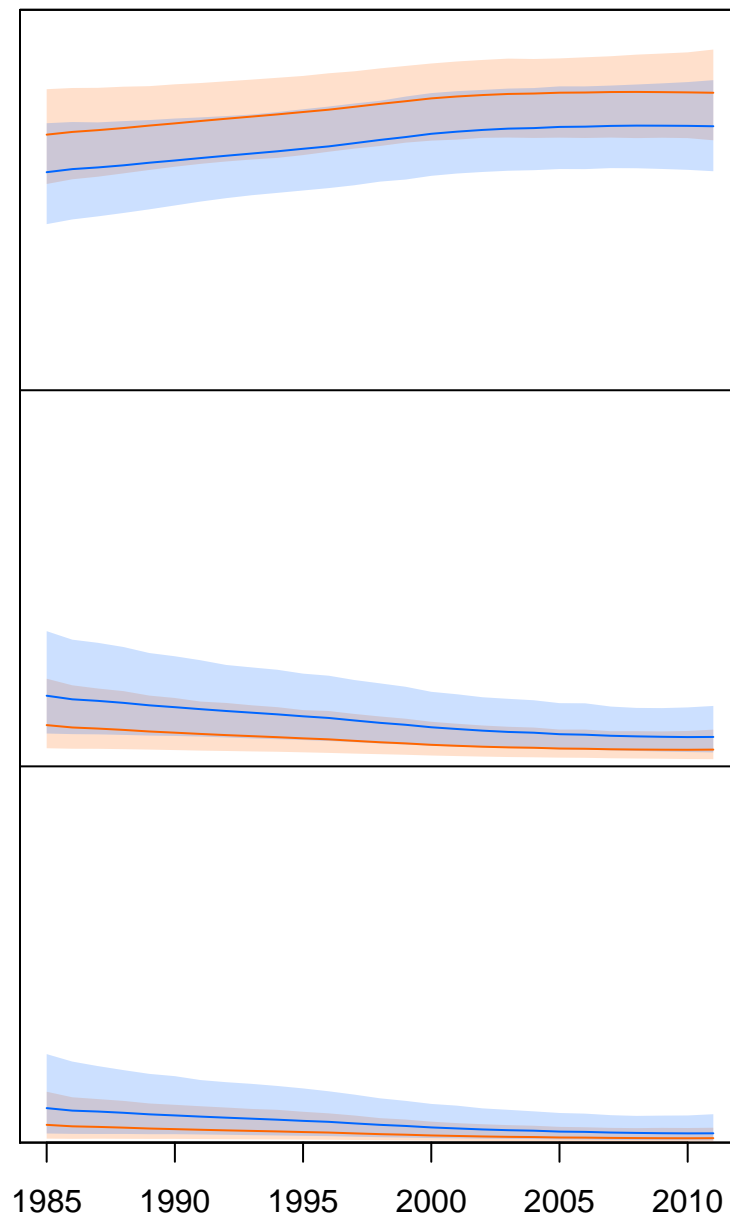

# Guatemala

Andean and Central Latin America and Caribbean Region

100

## HAZ

## WAZ

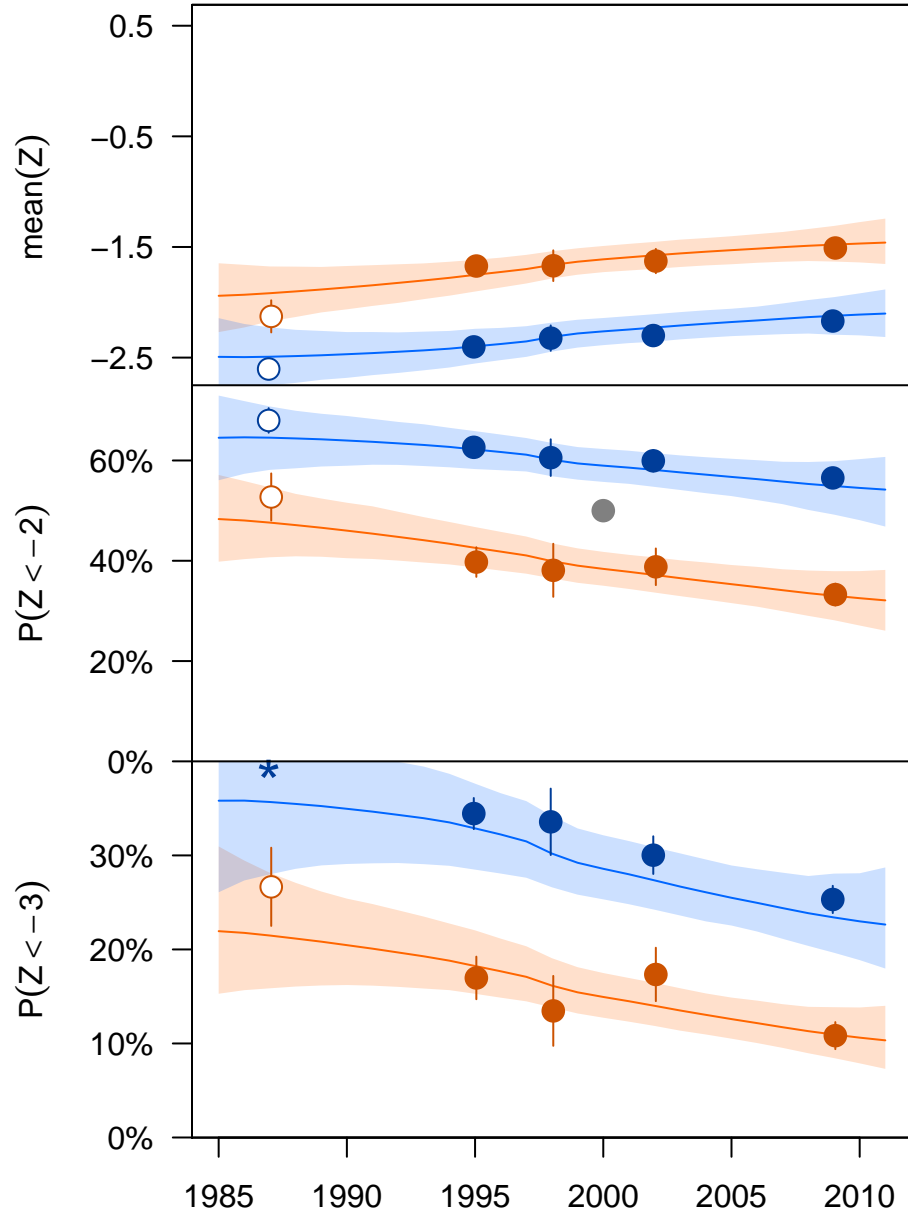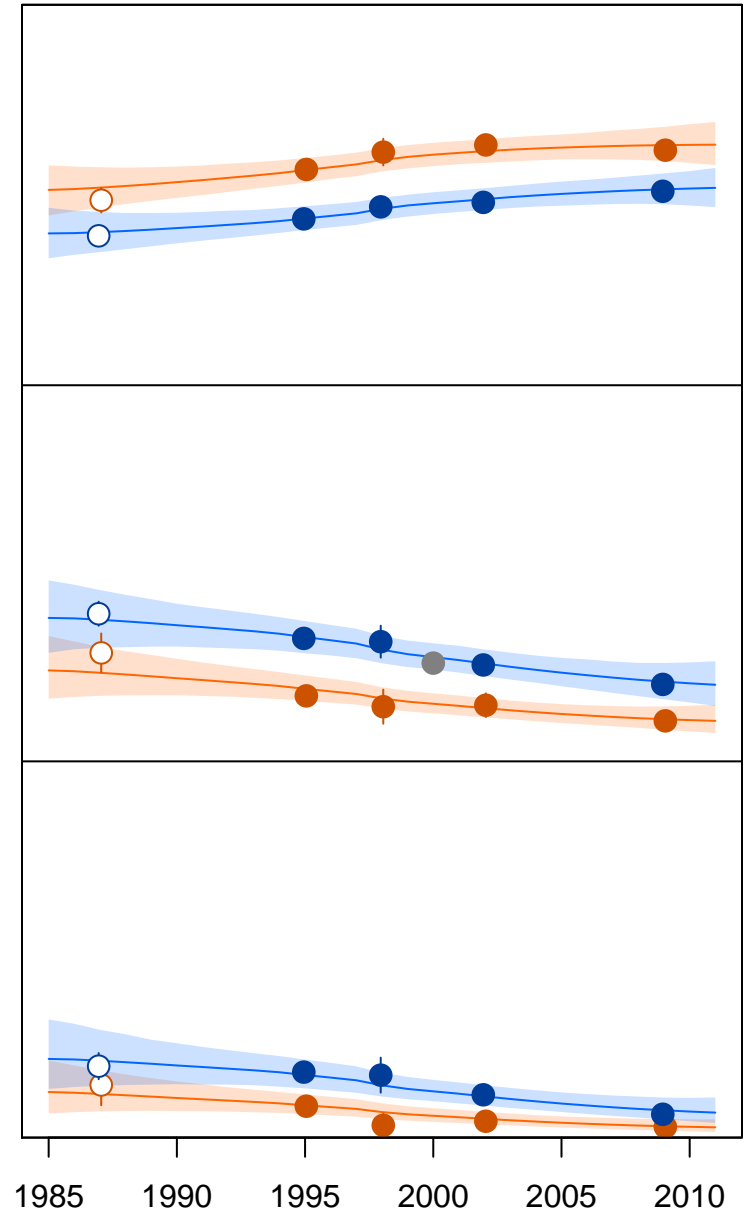

# Guinea

## Sub-Saharan Africa Region

### HAZ

### WAZ

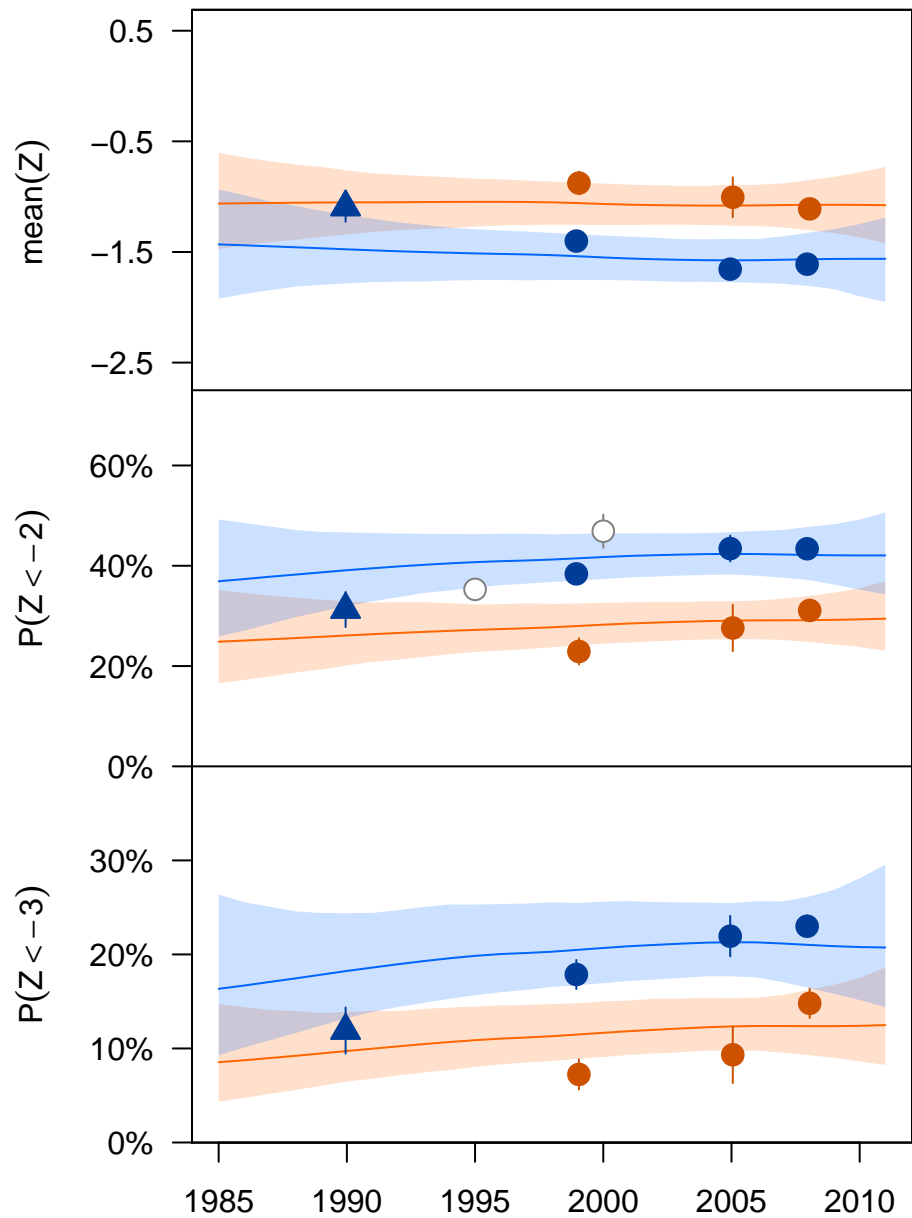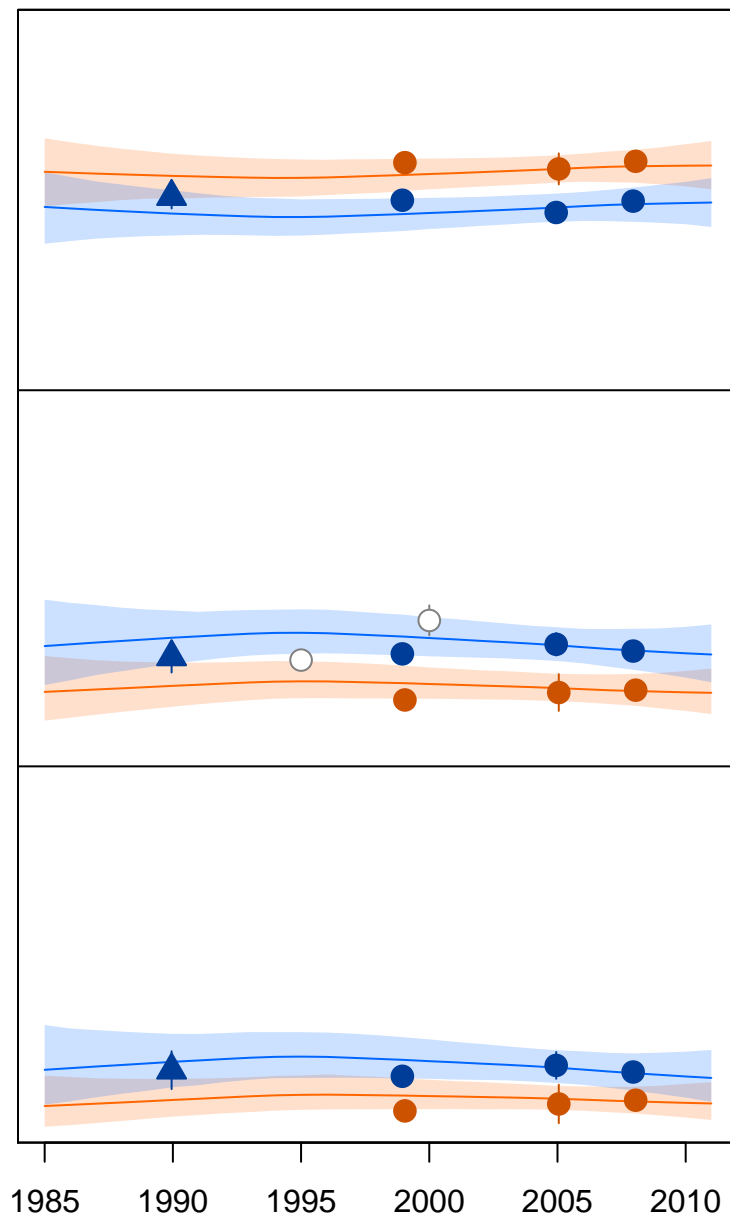

# Guinea-Bissau

## Sub-Saharan Africa Region

HAZ

WAZ

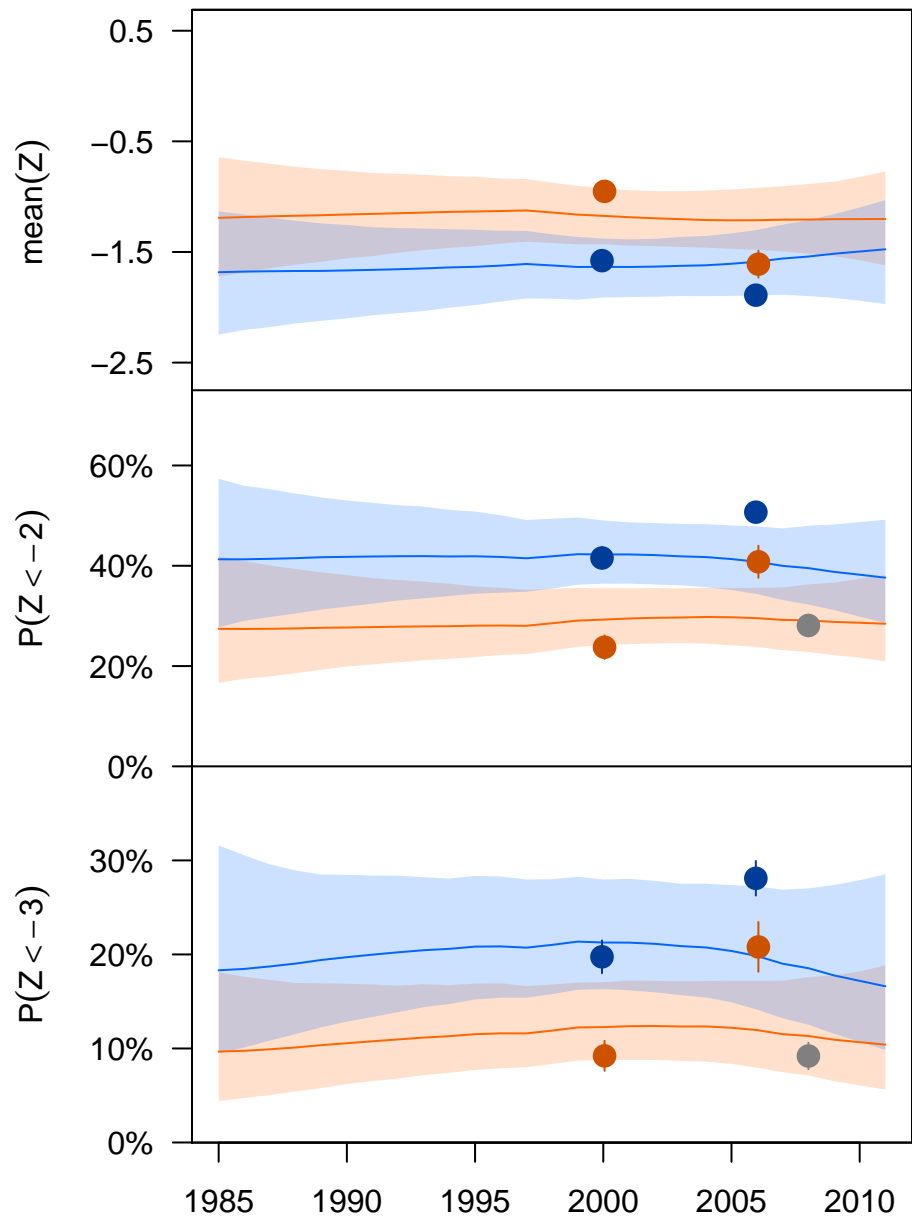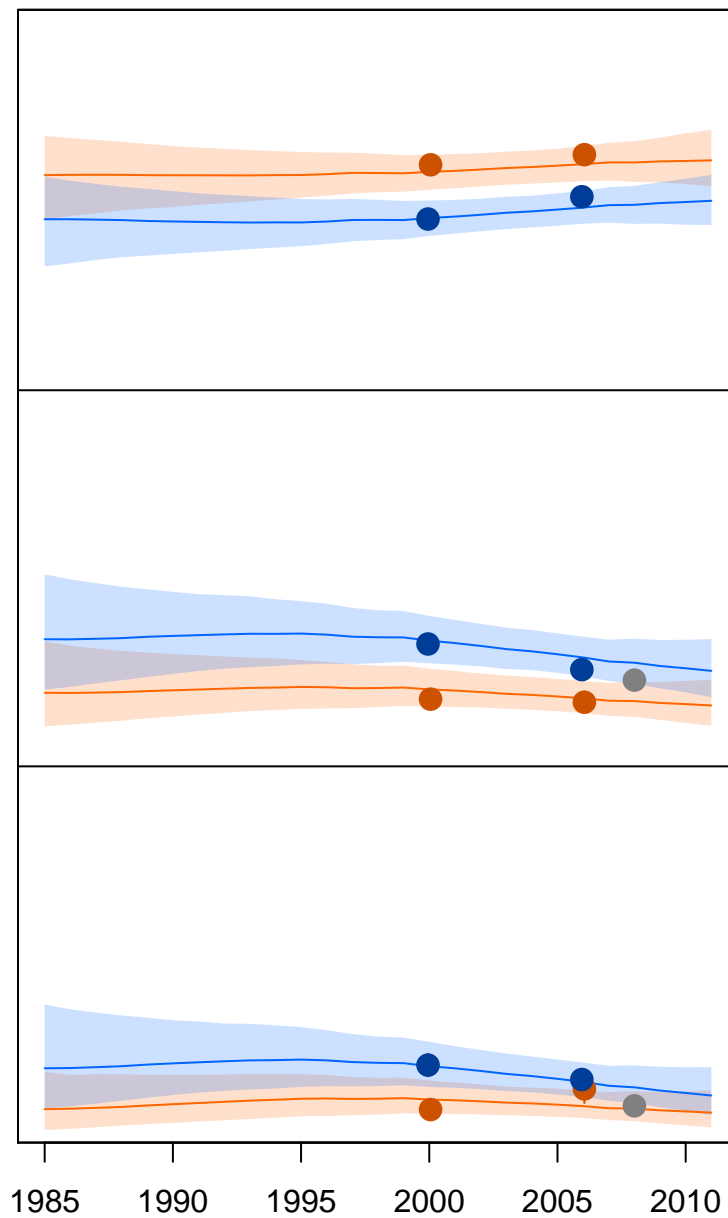

# Guyana

Andean and Central Latin America and Caribbean Region

## HAZ

## WAZ

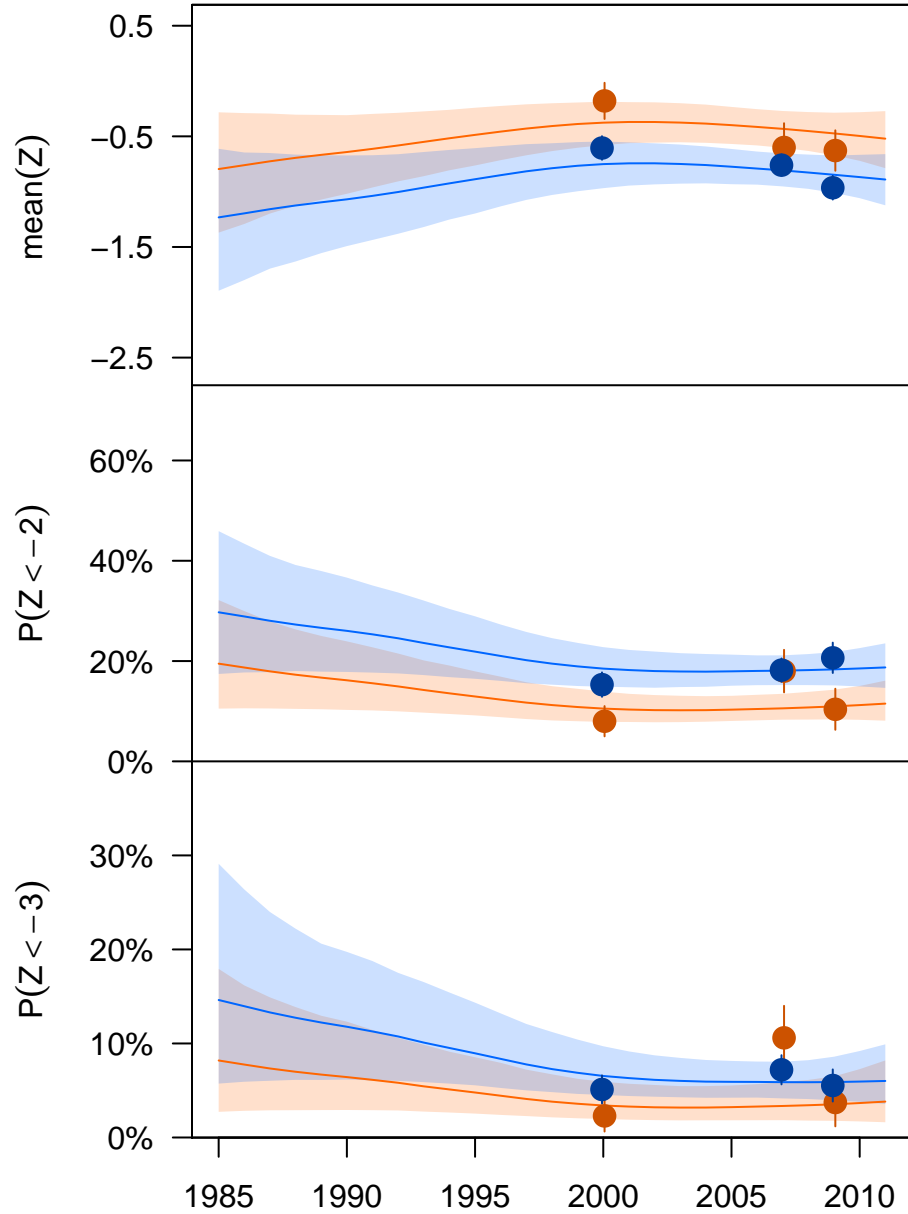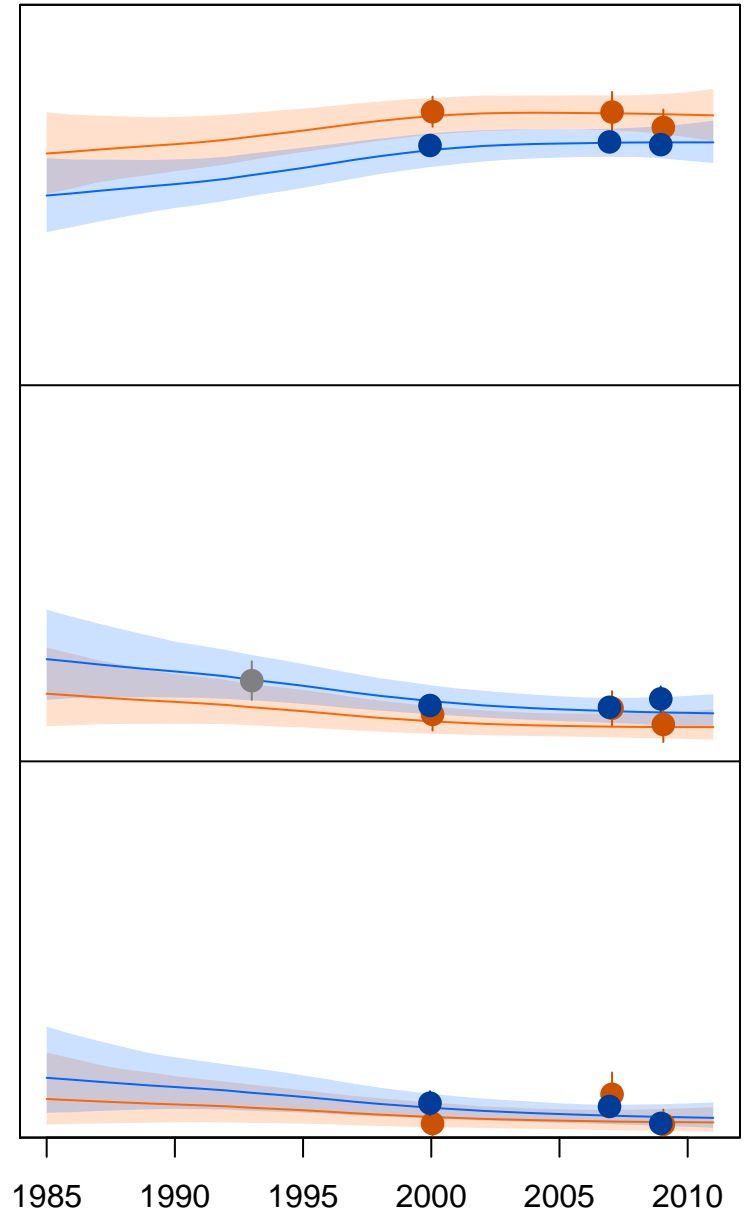



# Haiti

Andean and Central Latin America and Caribbean Region

## HAZ

## WAZ

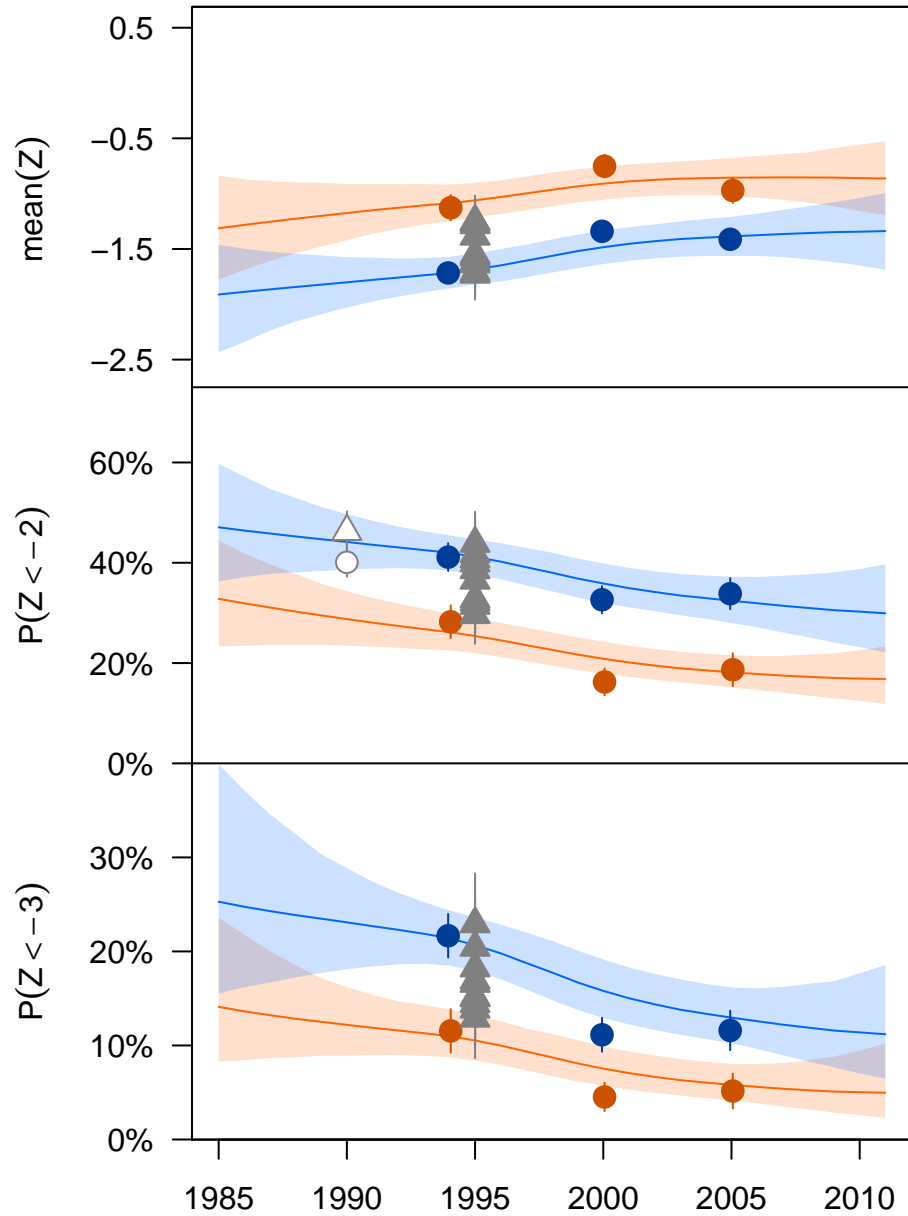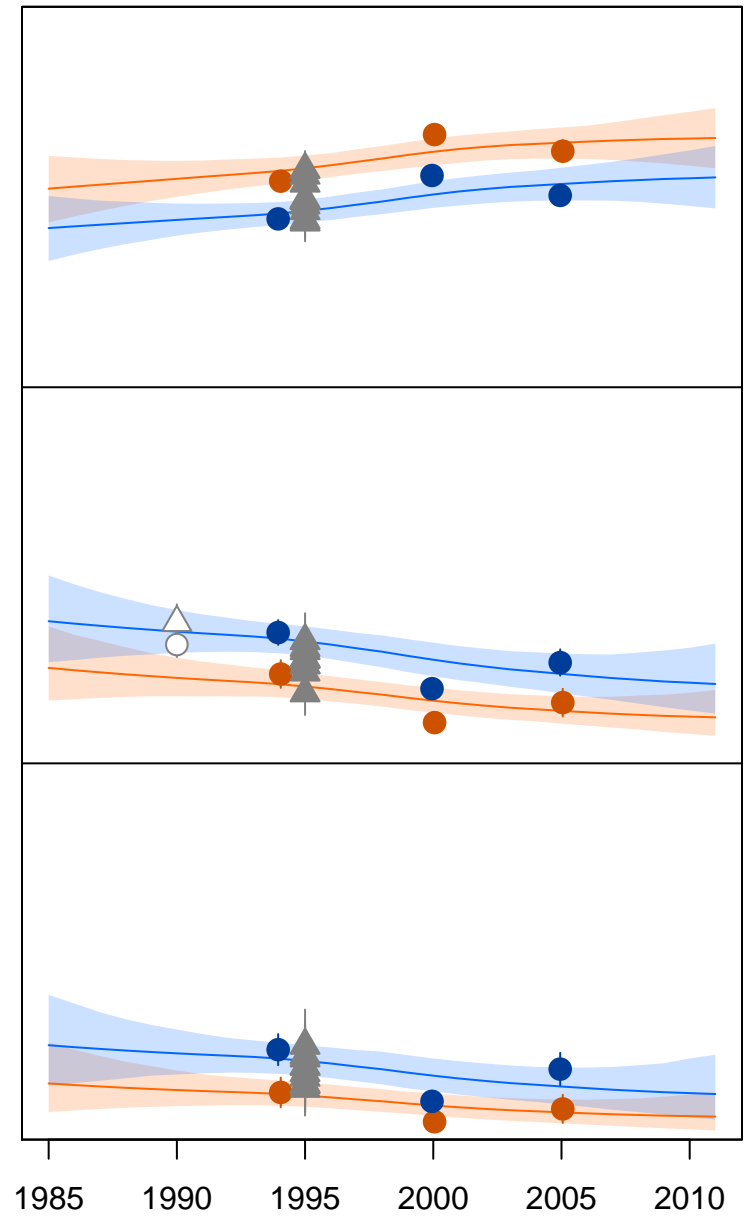

# Honduras

Andean and Central Latin America and Caribbean Region

## HAZ

## WAZ

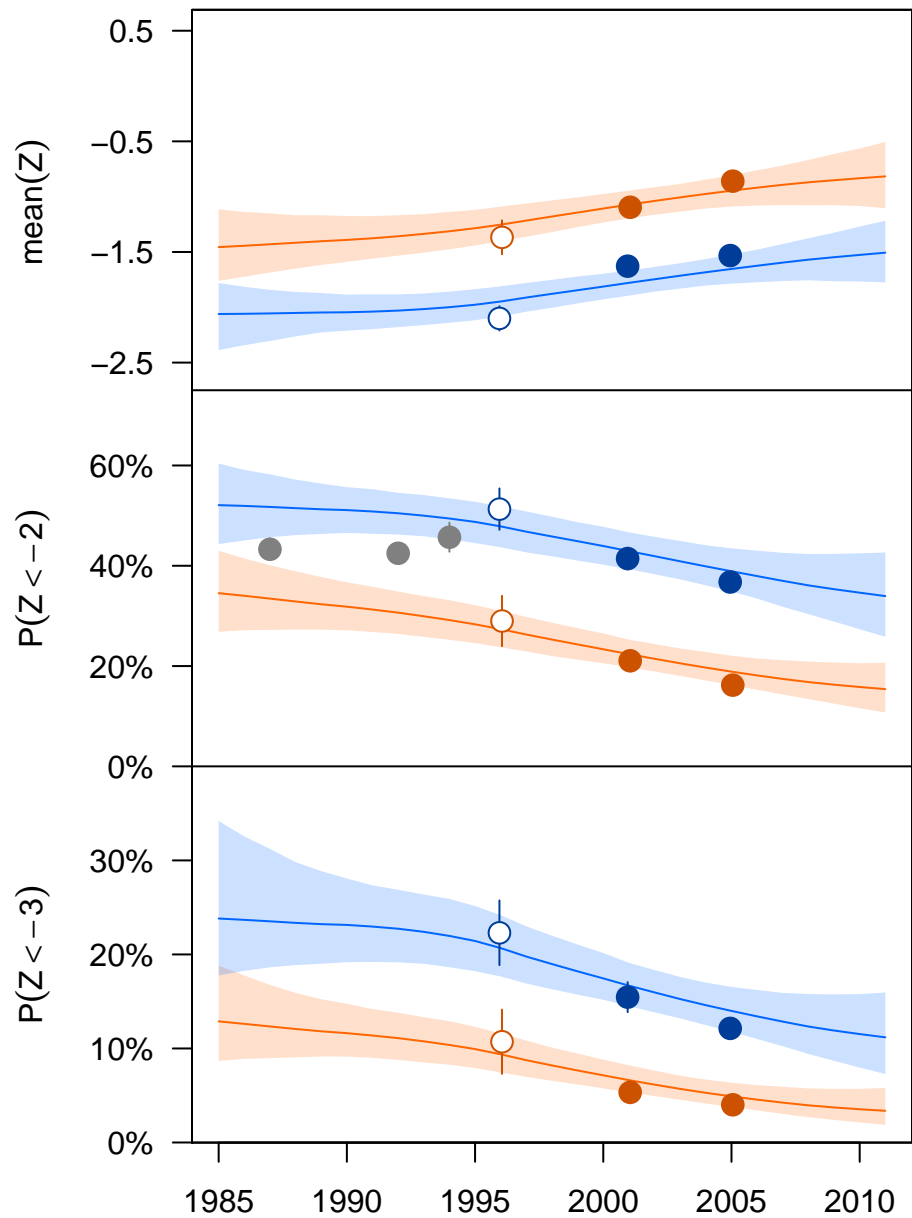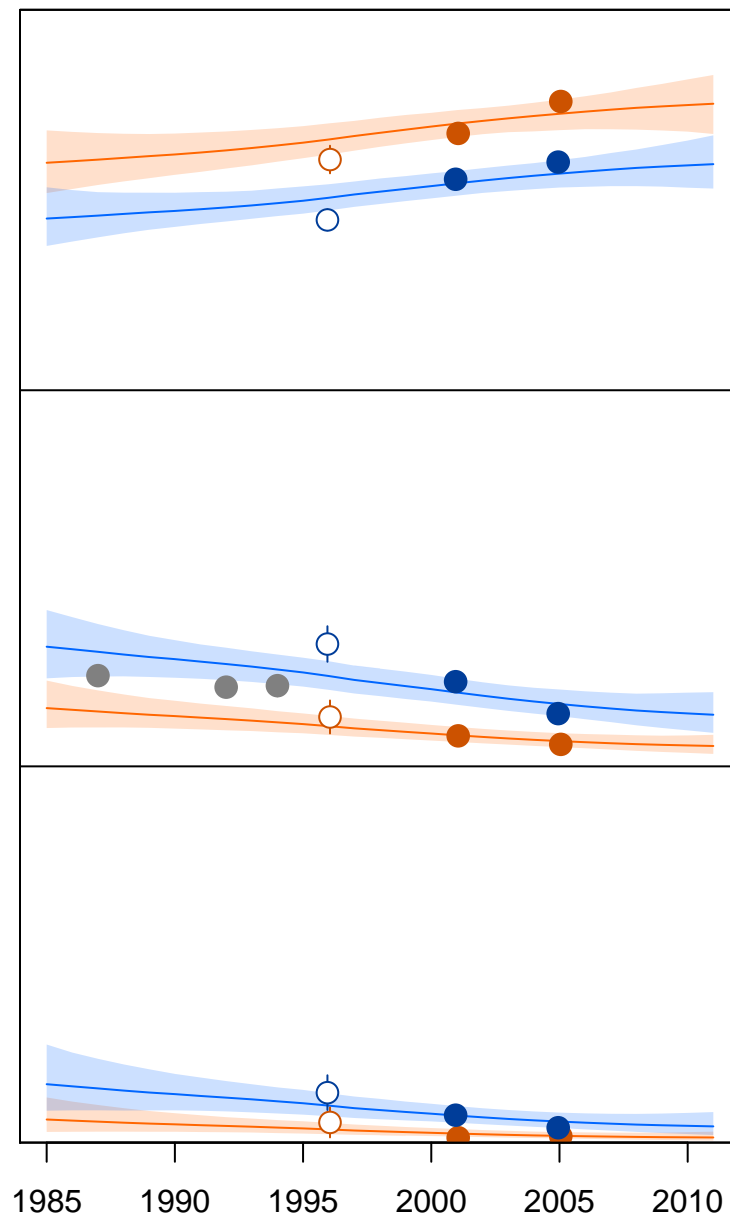

HAZ

WAZ

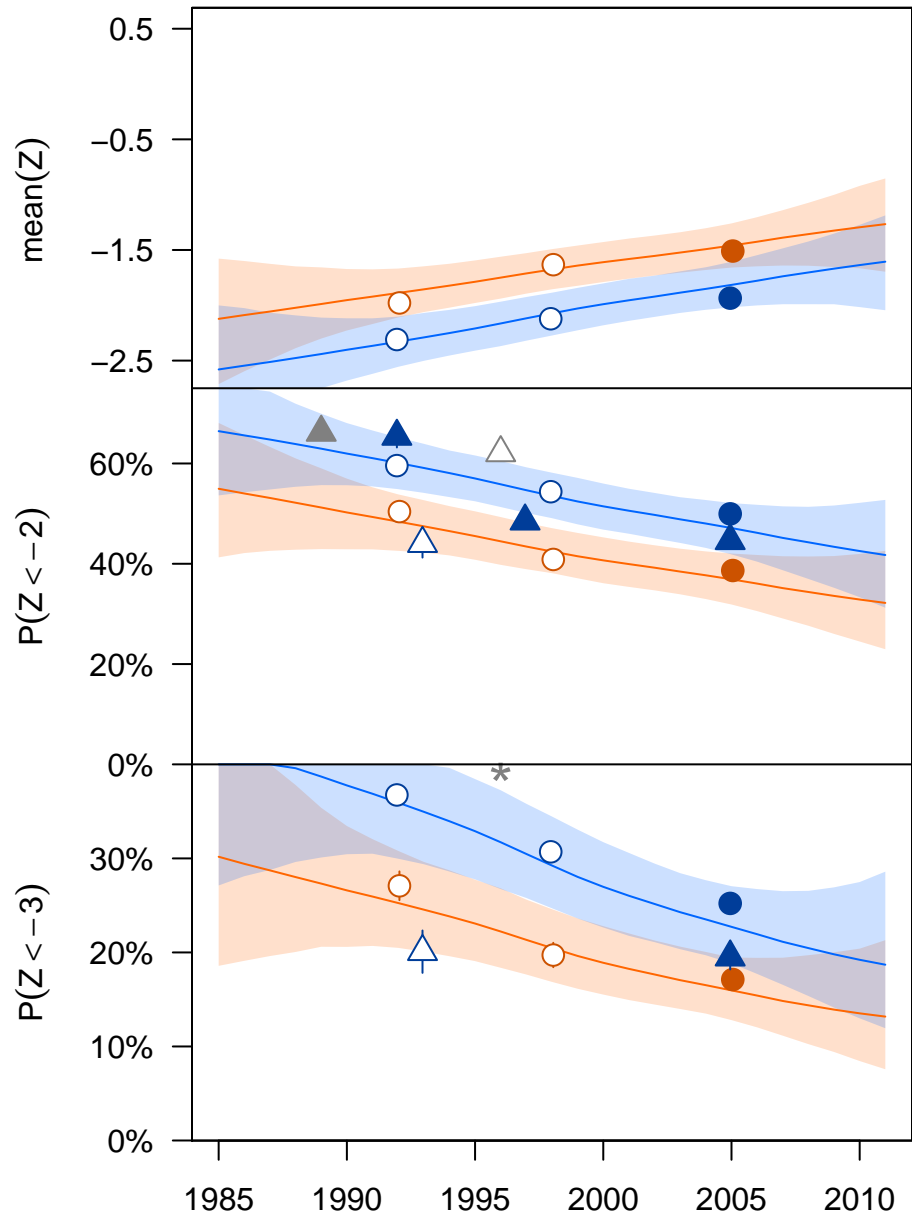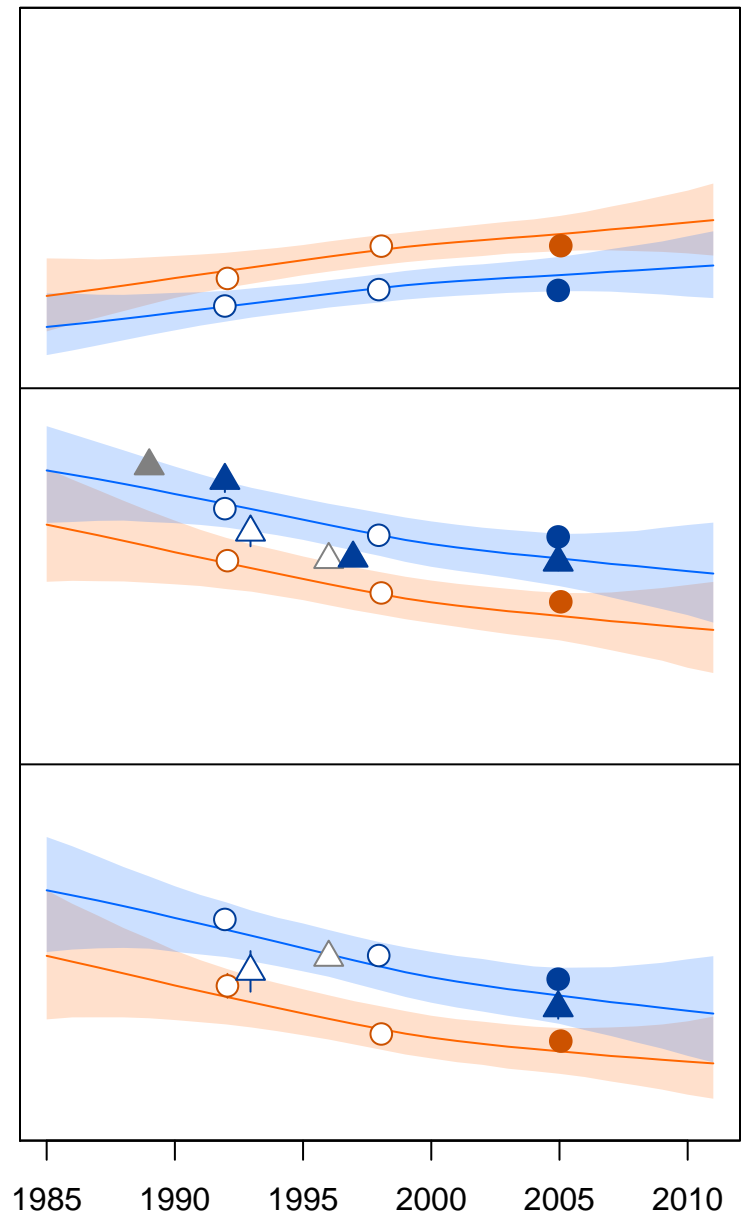

# Indonesia

## East and Southeast Asia Region

### HAZ

### WAZ

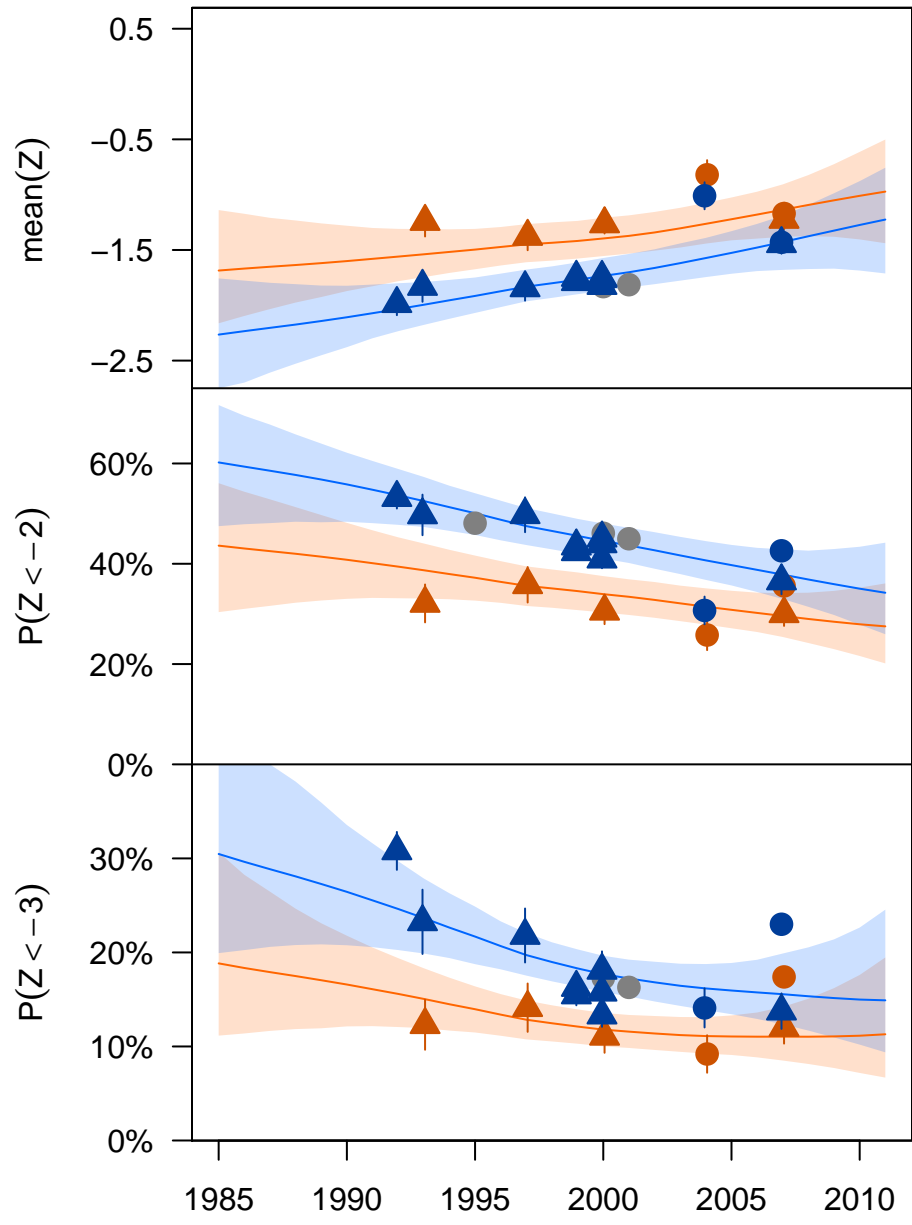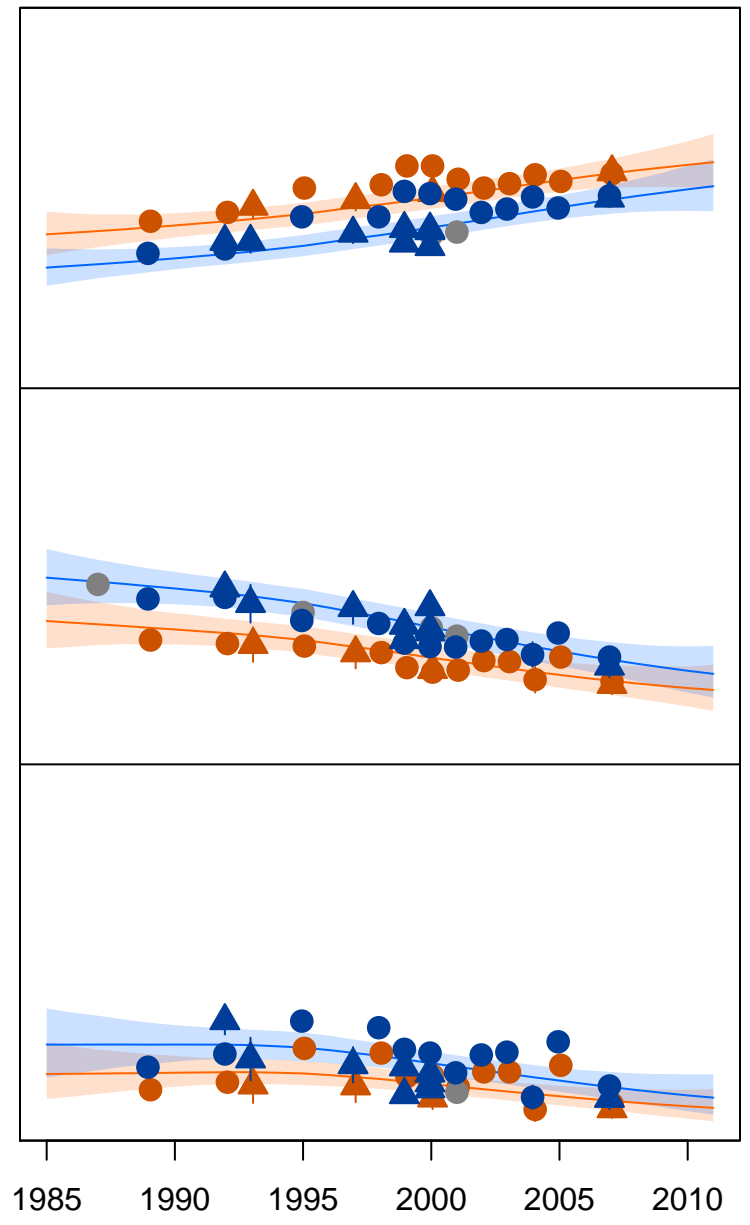

# Iran (Islamic Republic of)

Central Asia, Middle East, and North Africa Region

### HAZ

### WAZ

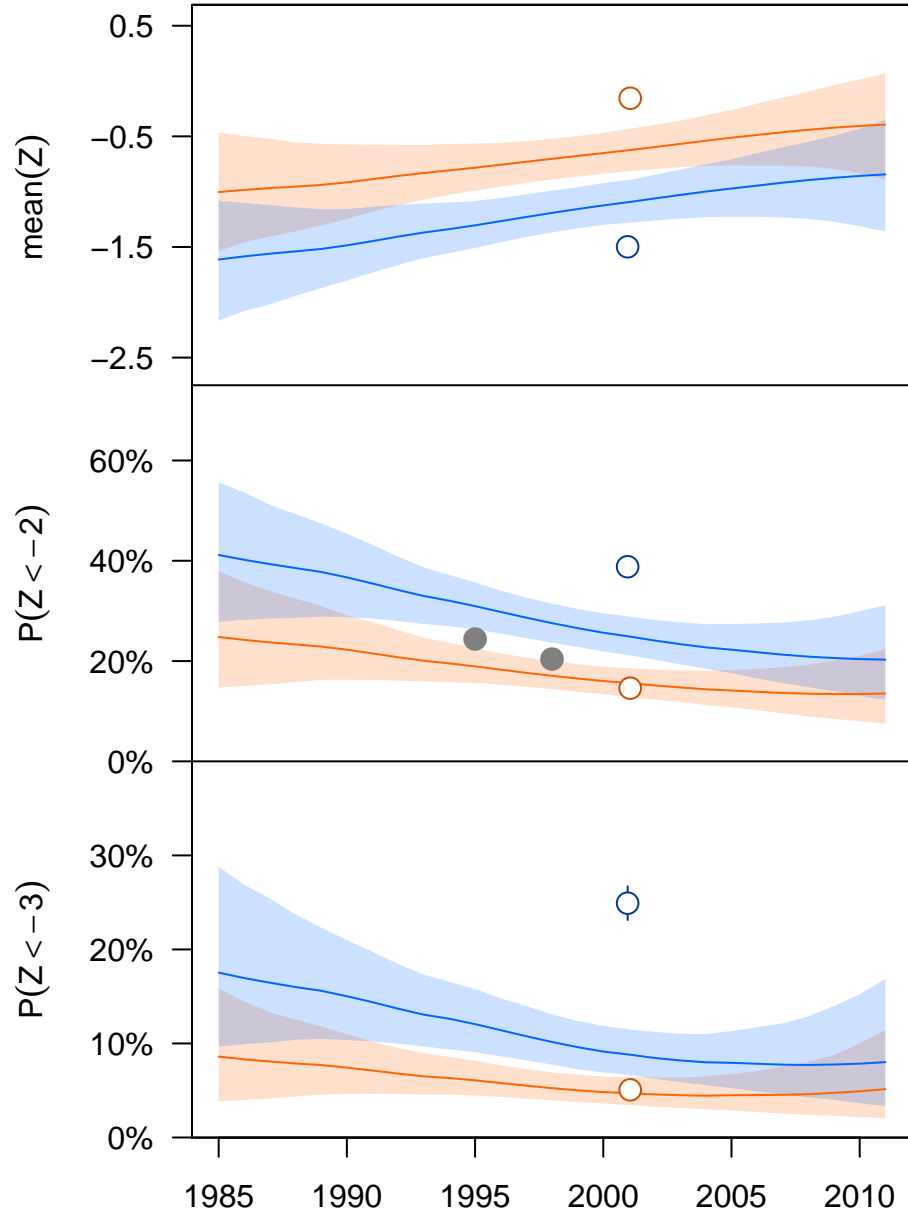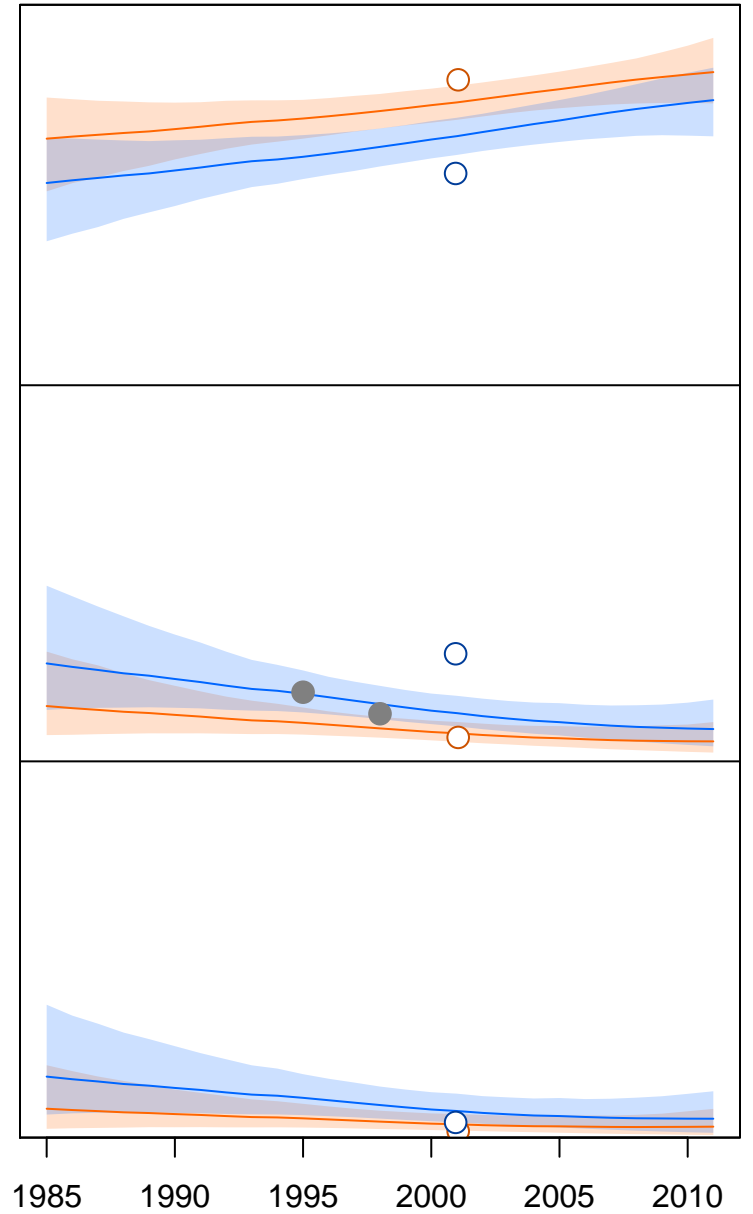

# Iraq

Central Asia, Middle East, and North Africa Region

### HAZ

### WAZ

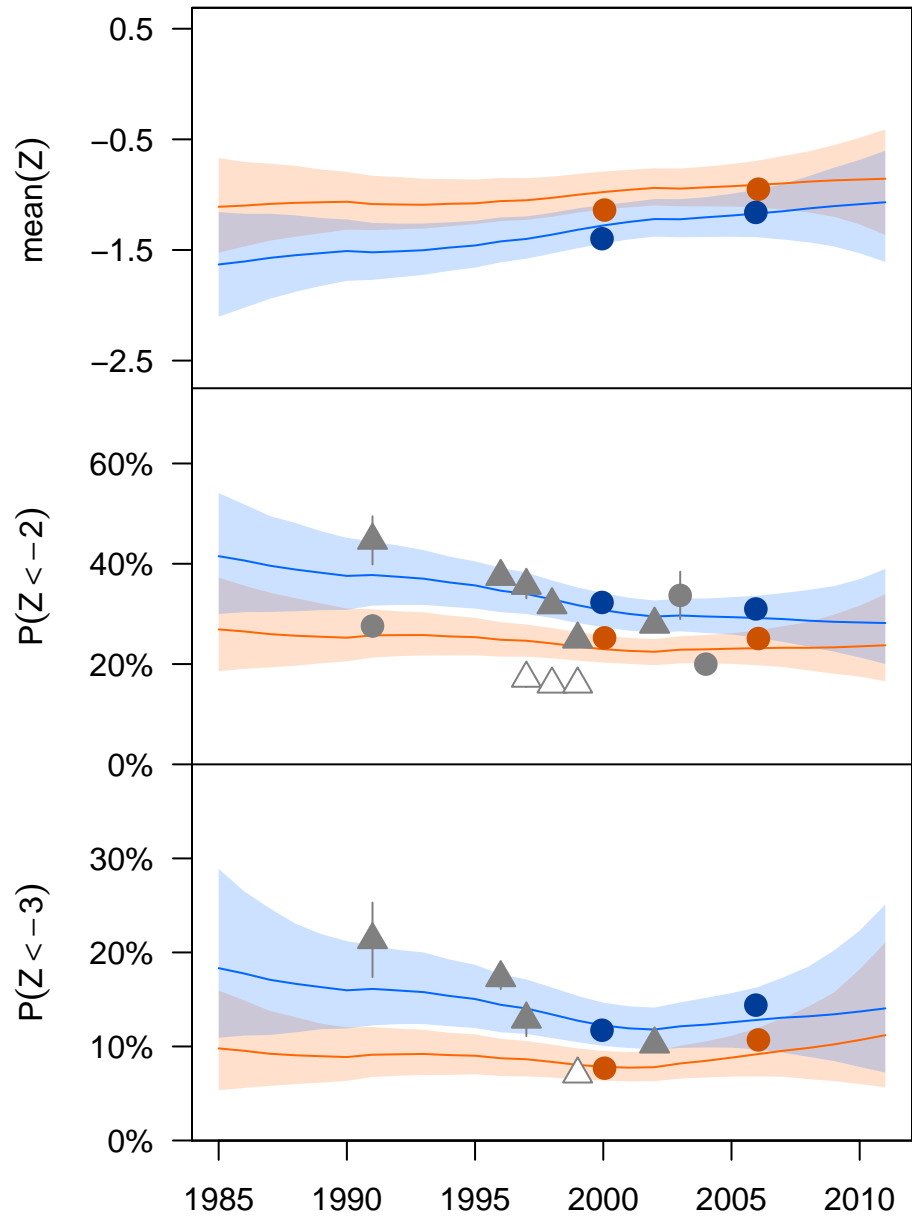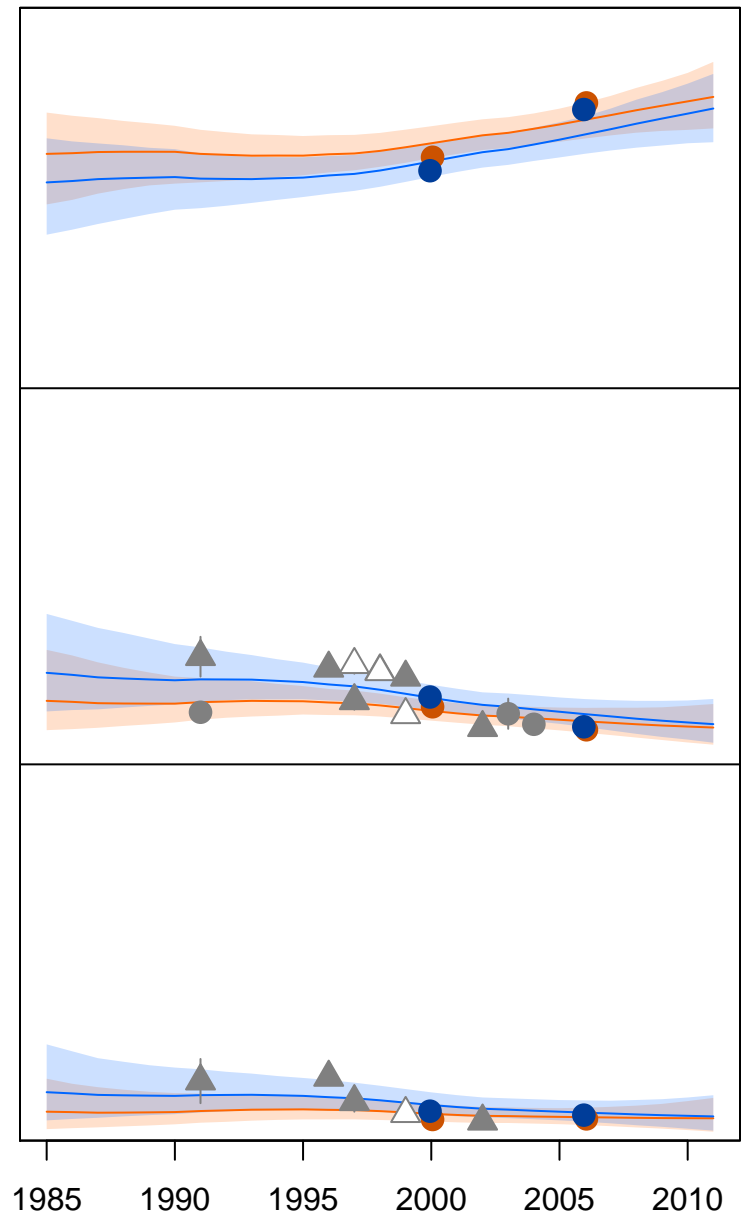

# Jamaica

Andean and Central Latin America and Caribbean Region

110

## HAZ

## WAZ

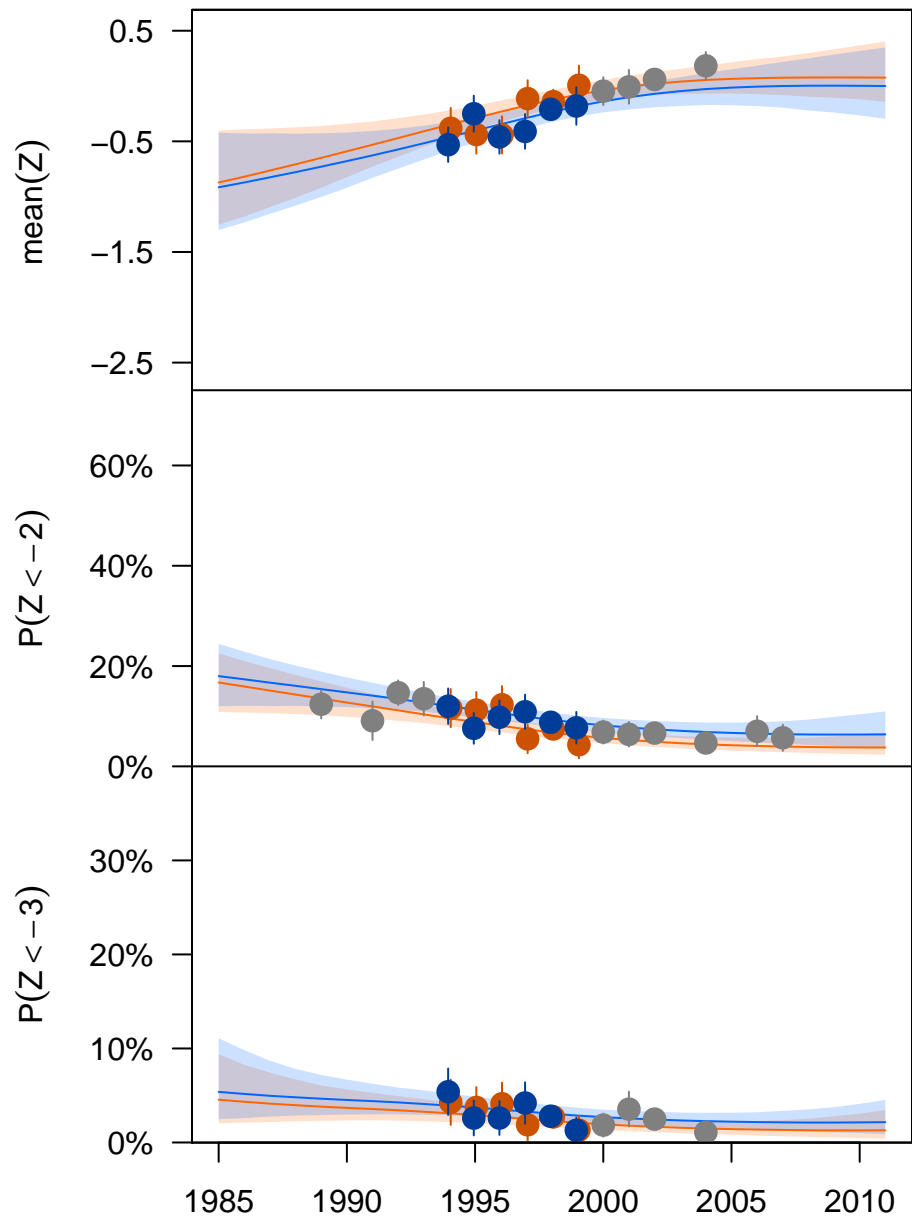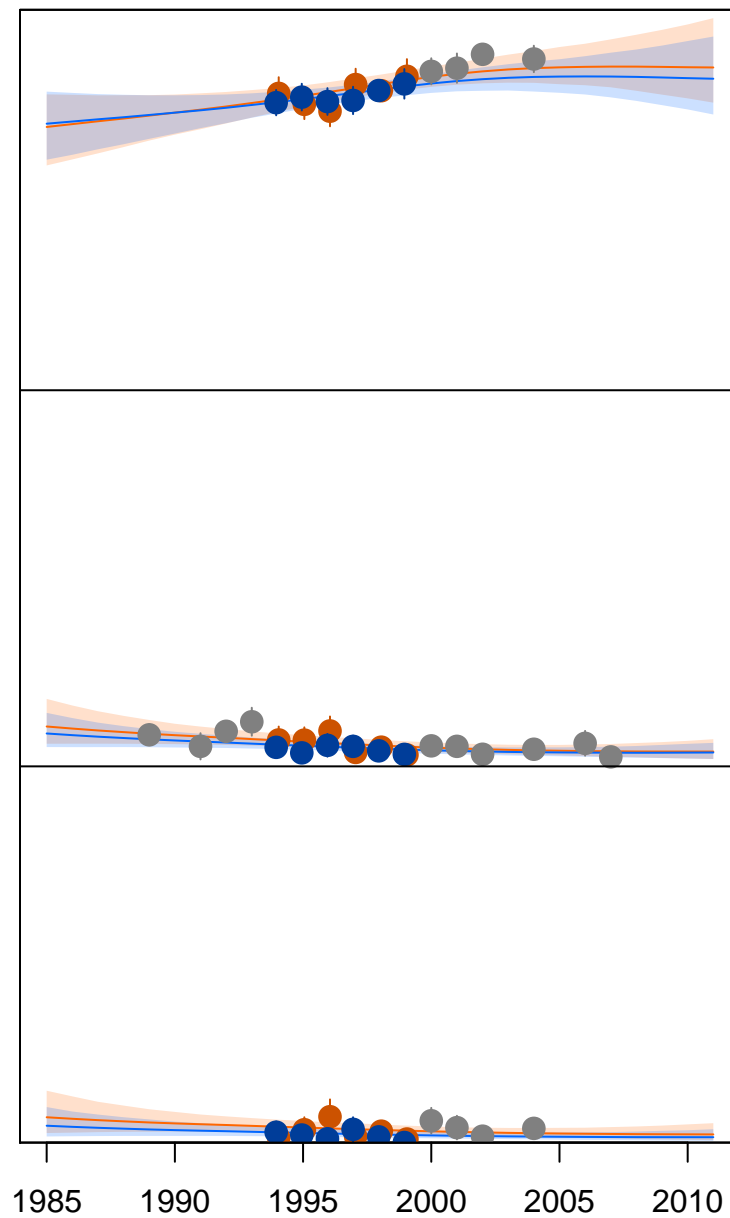

# Jordan

## Central Asia, Middle East, and North Africa Region

**HAZ**

**WAZ**

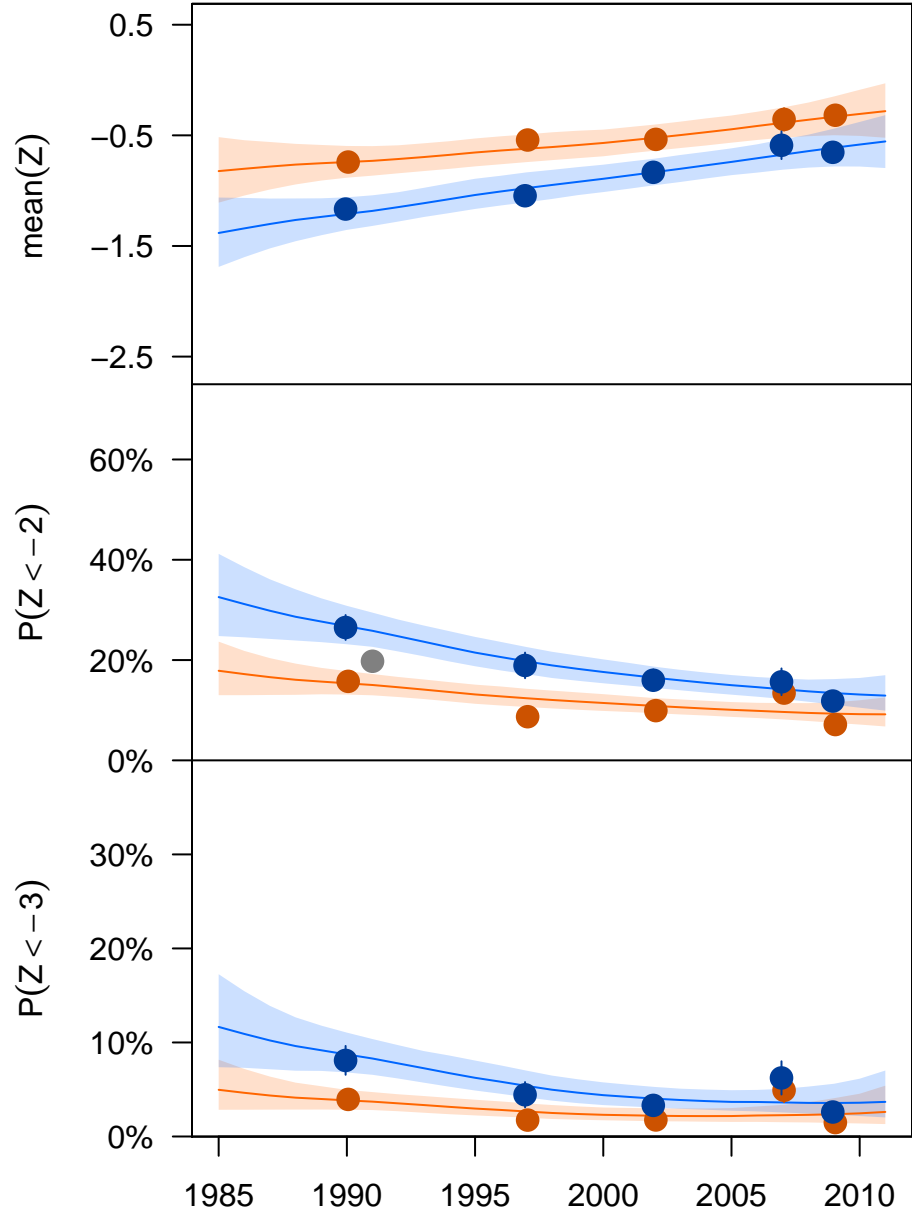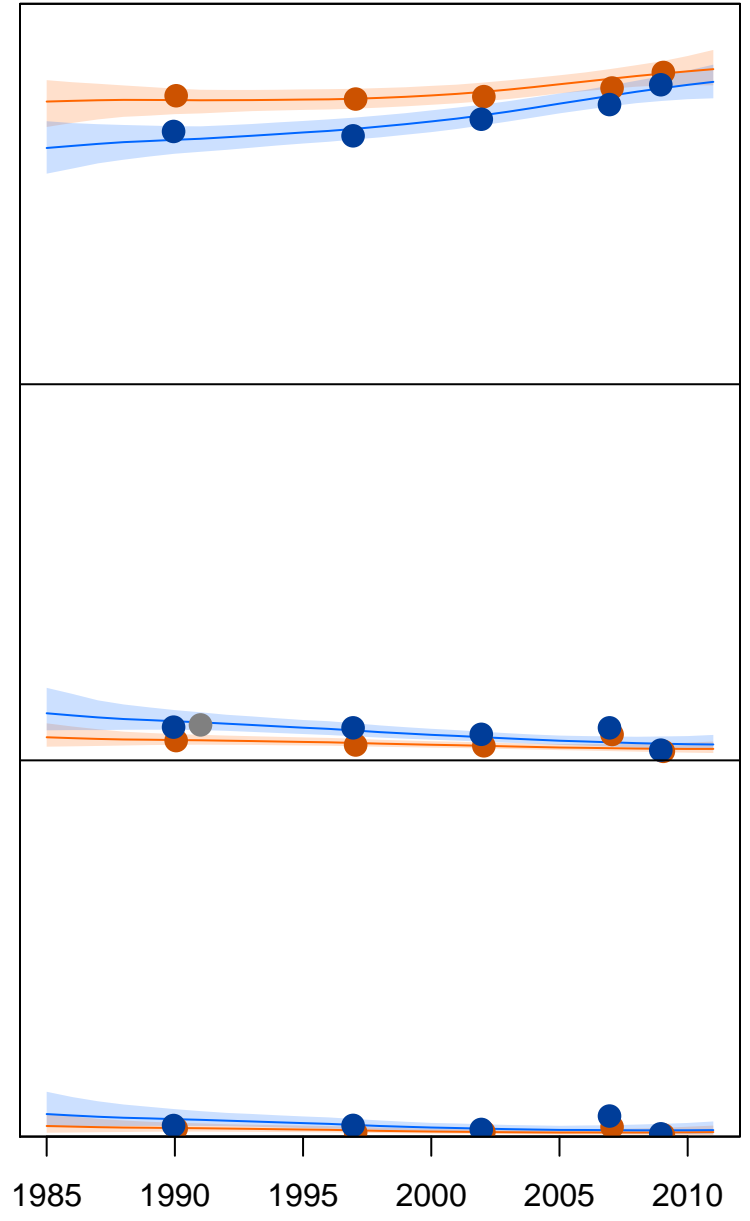



# Kazakhstan

Central Asia, Middle East, and North Africa Region

### HAZ

### WAZ

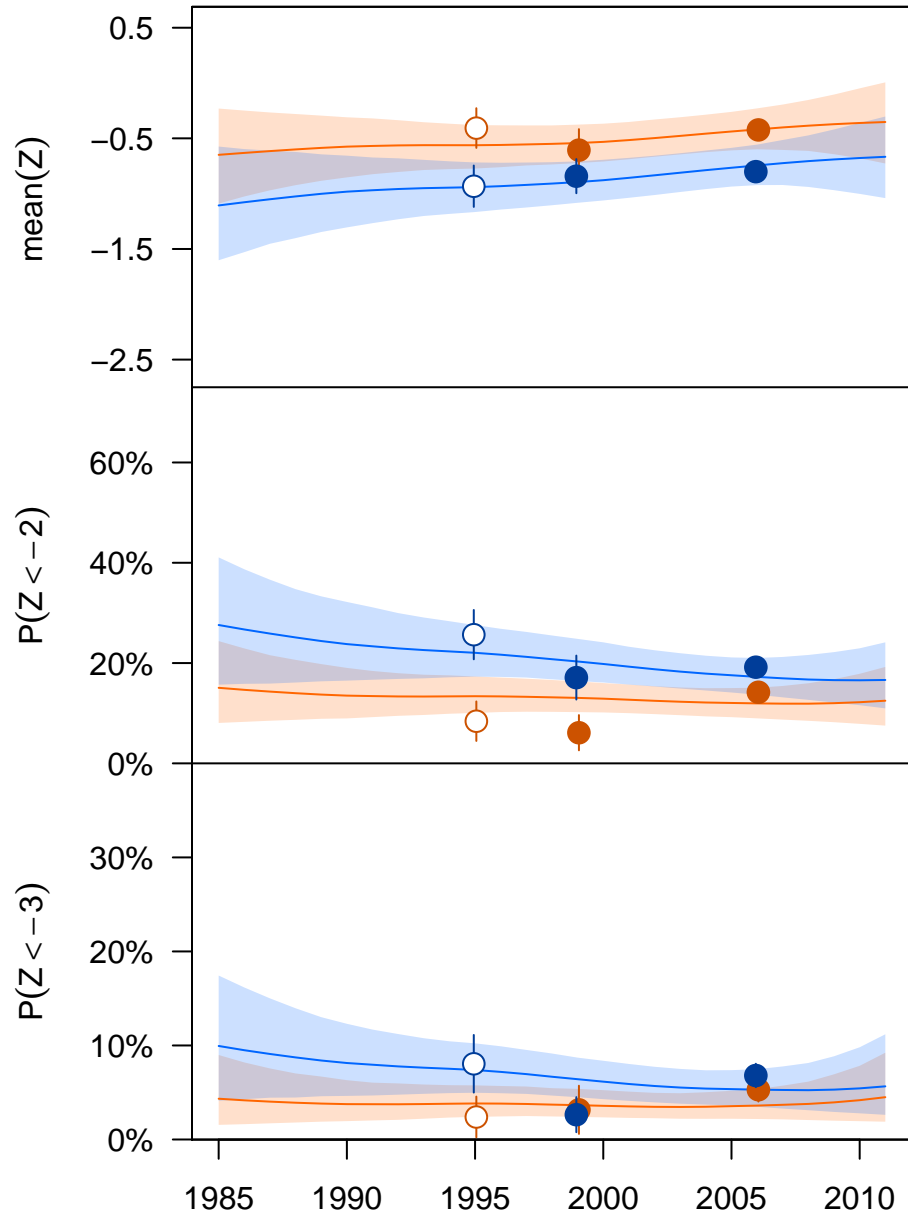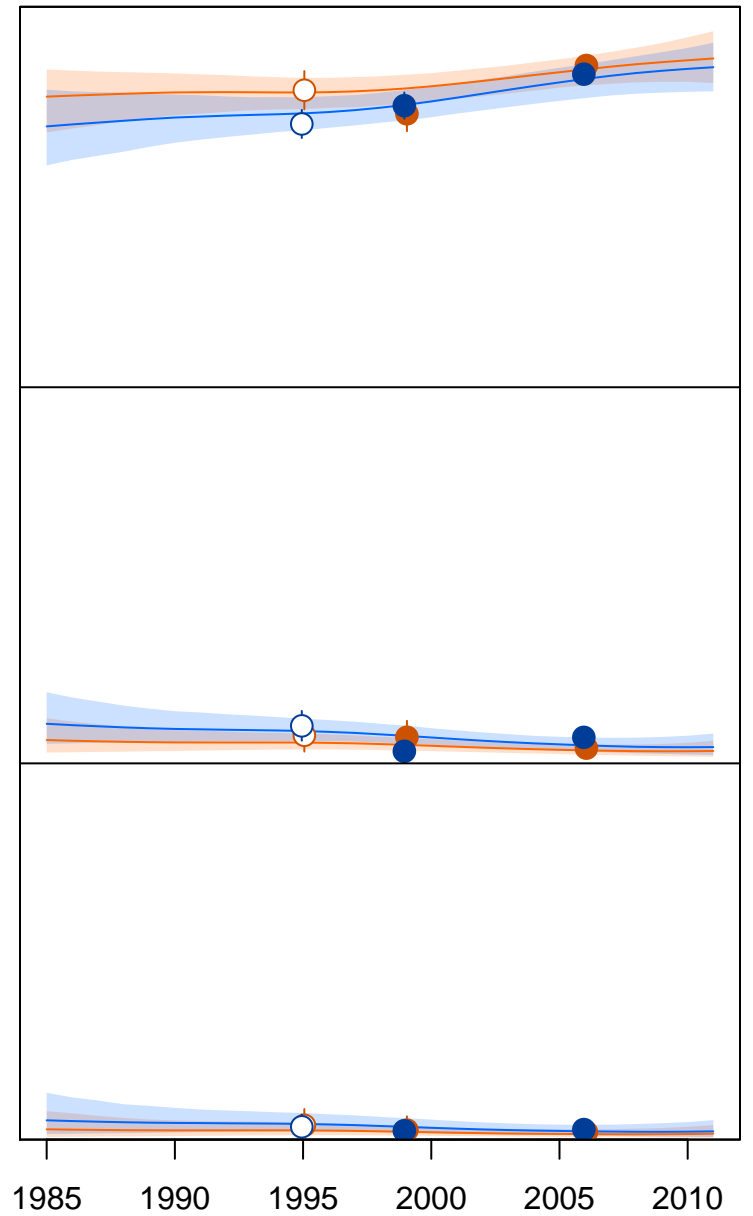

# Kenya

## Sub-Saharan Africa Region

### HAZ

### WAZ

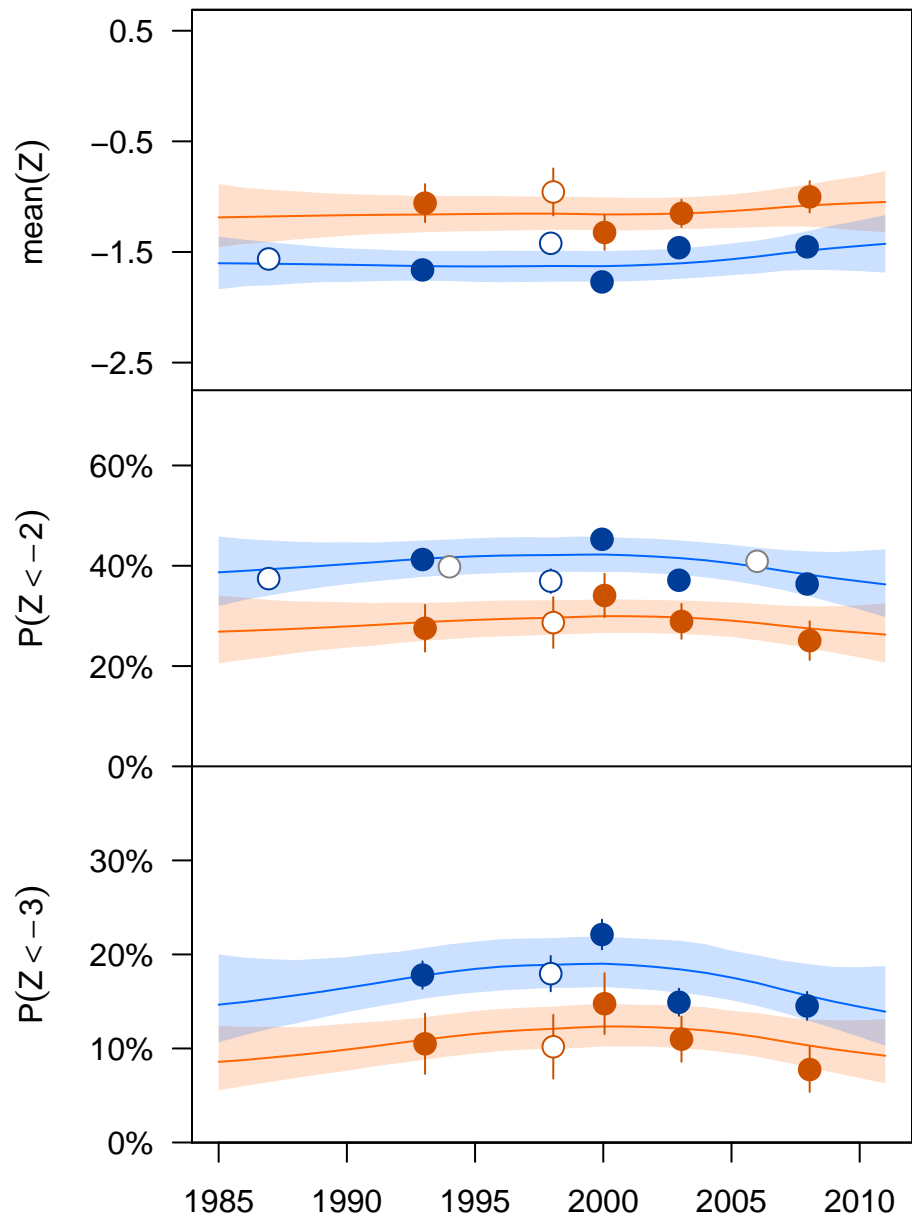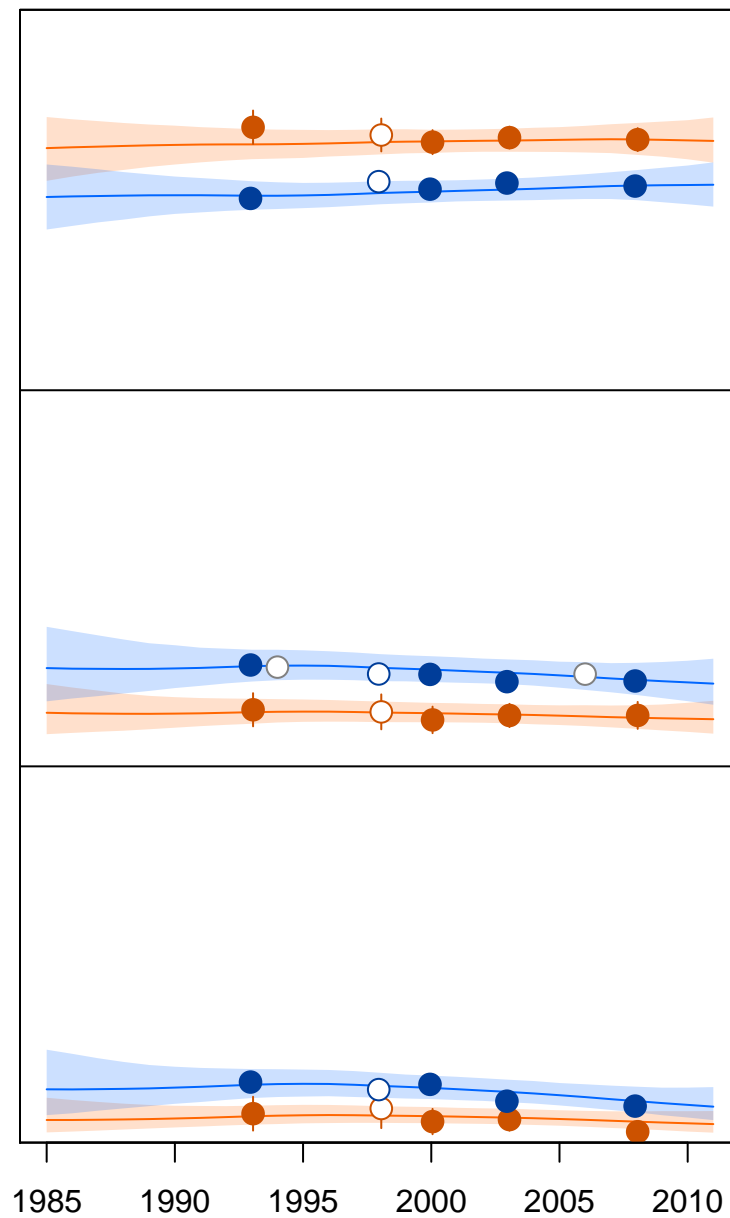

Kiribati  
Oceania Region

114

HAZ

WAZ

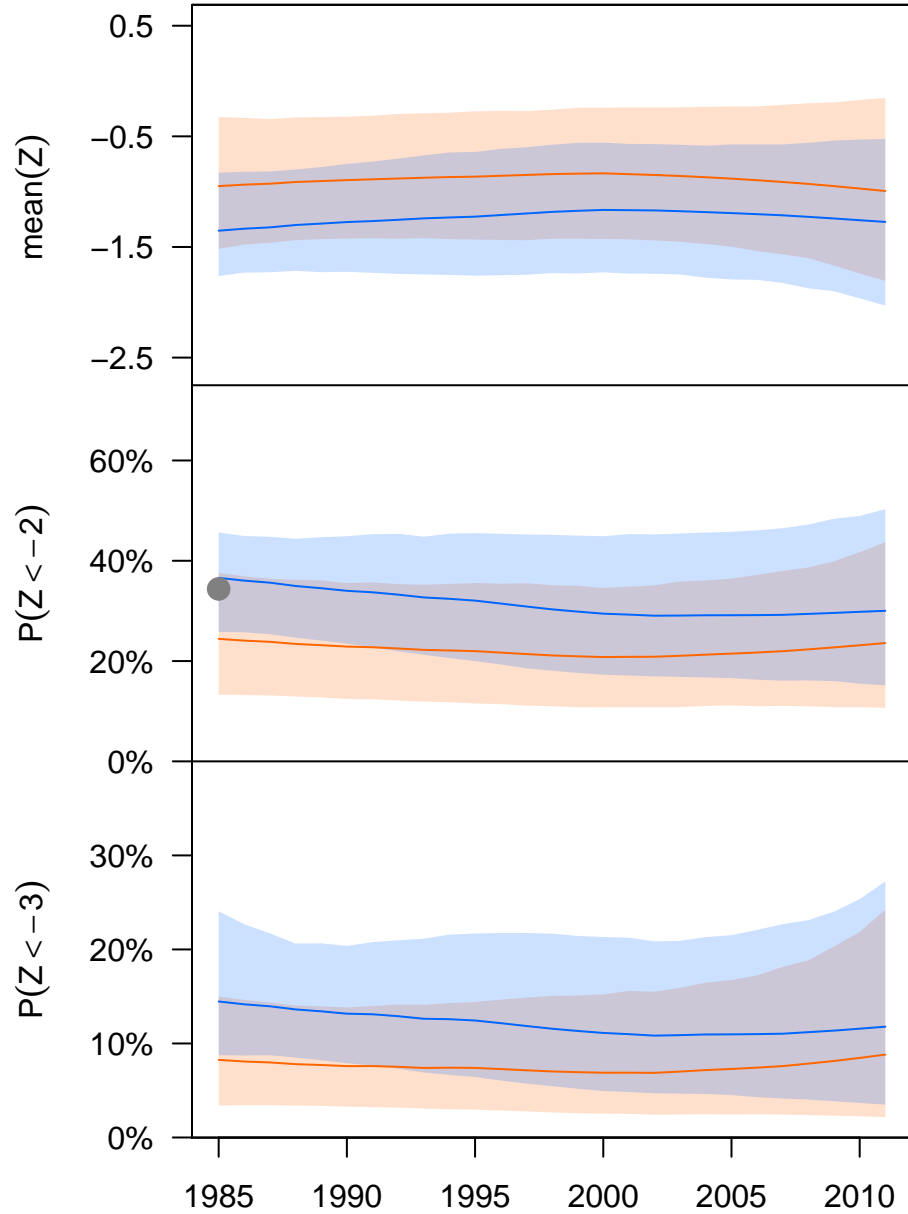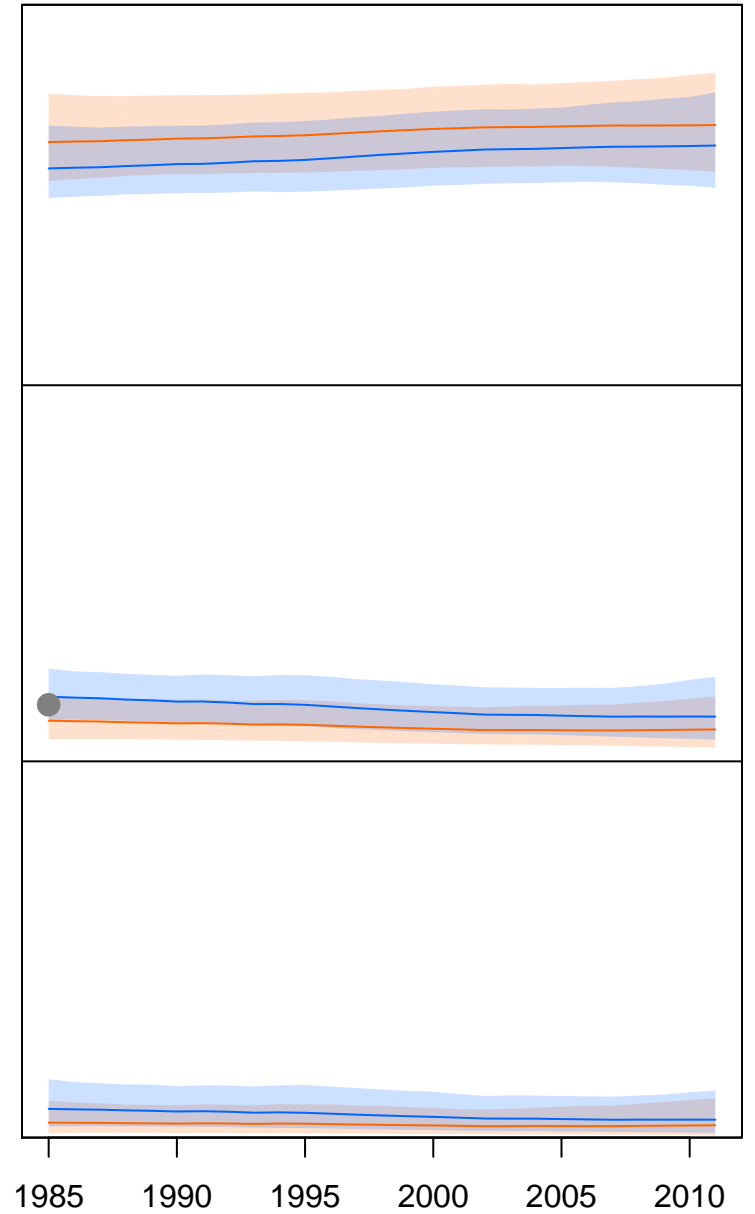

# Kuwait

Central Asia, Middle East, and North Africa Region

### HAZ

### WAZ

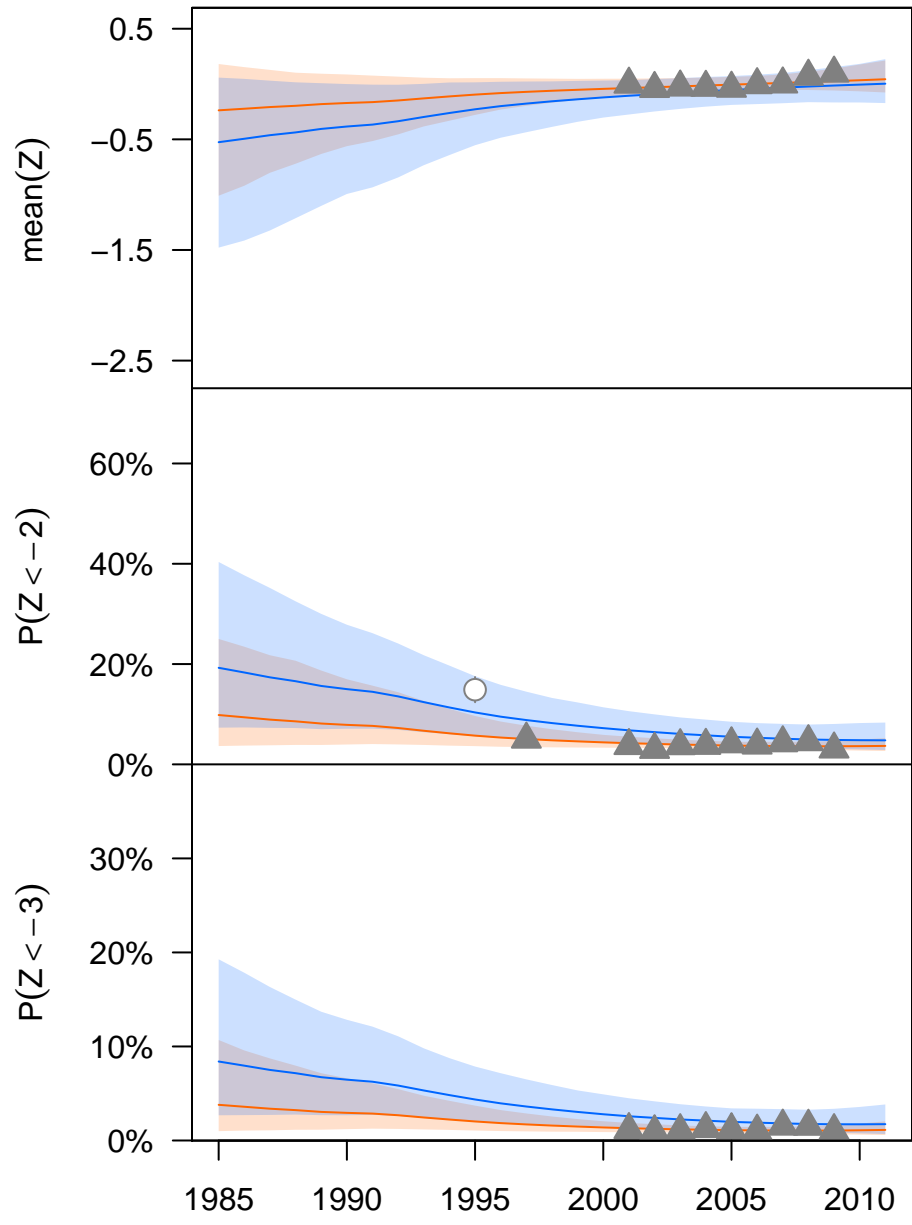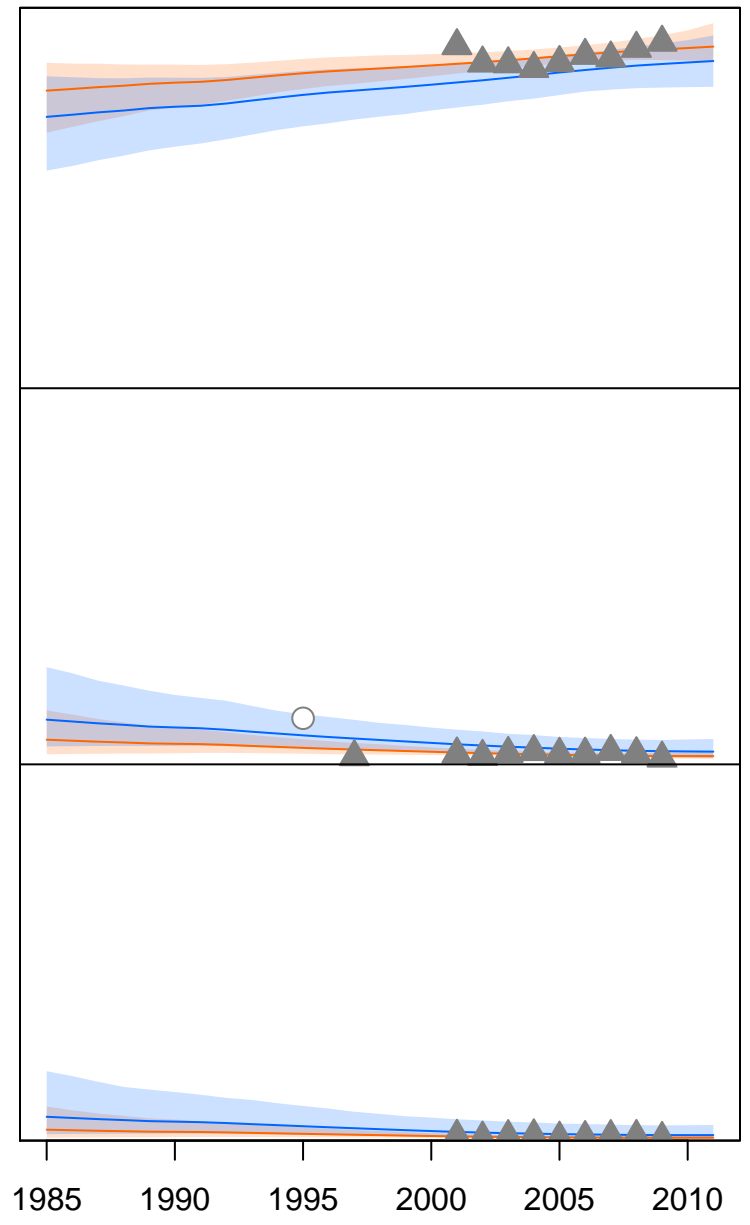

# Kyrgyzstan

Central Asia, Middle East, and North Africa Region

### HAZ

### WAZ

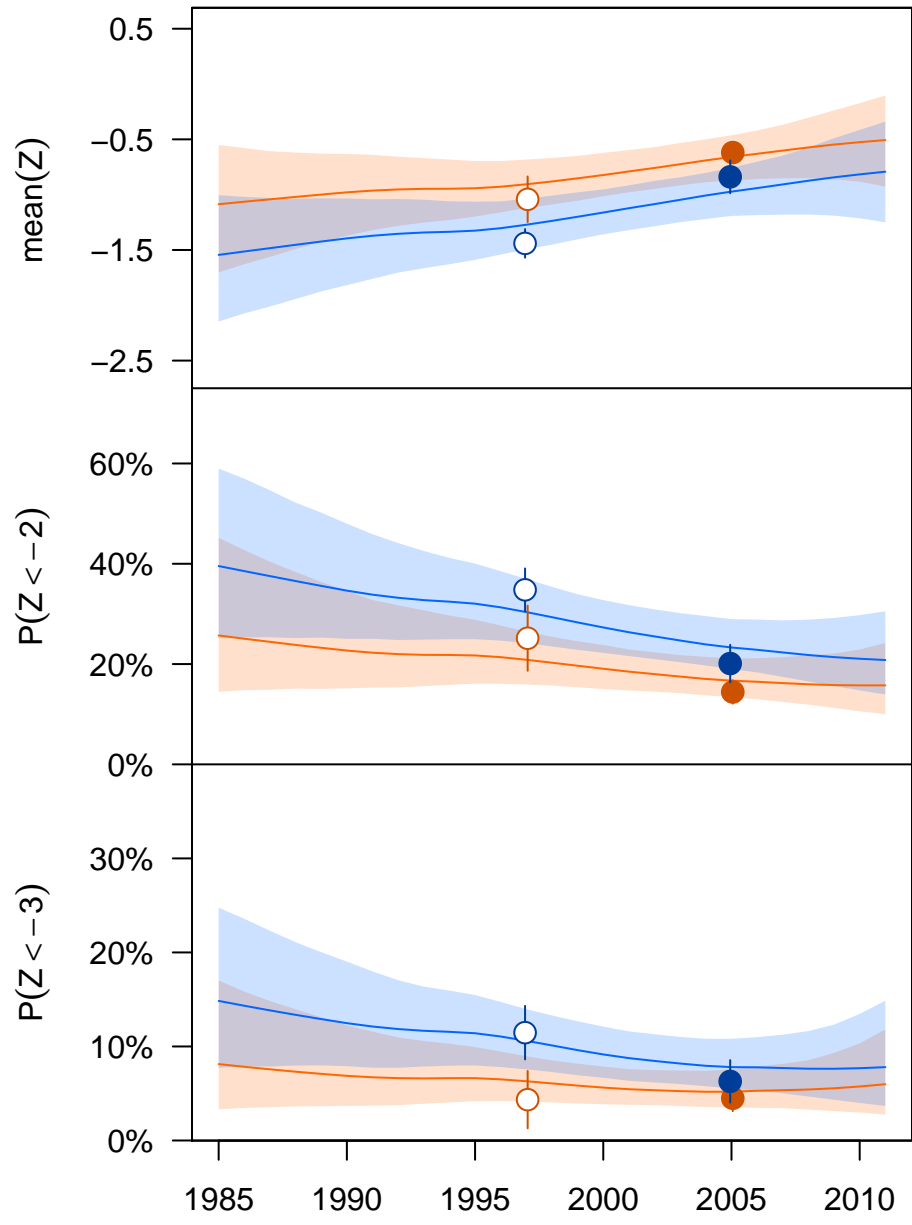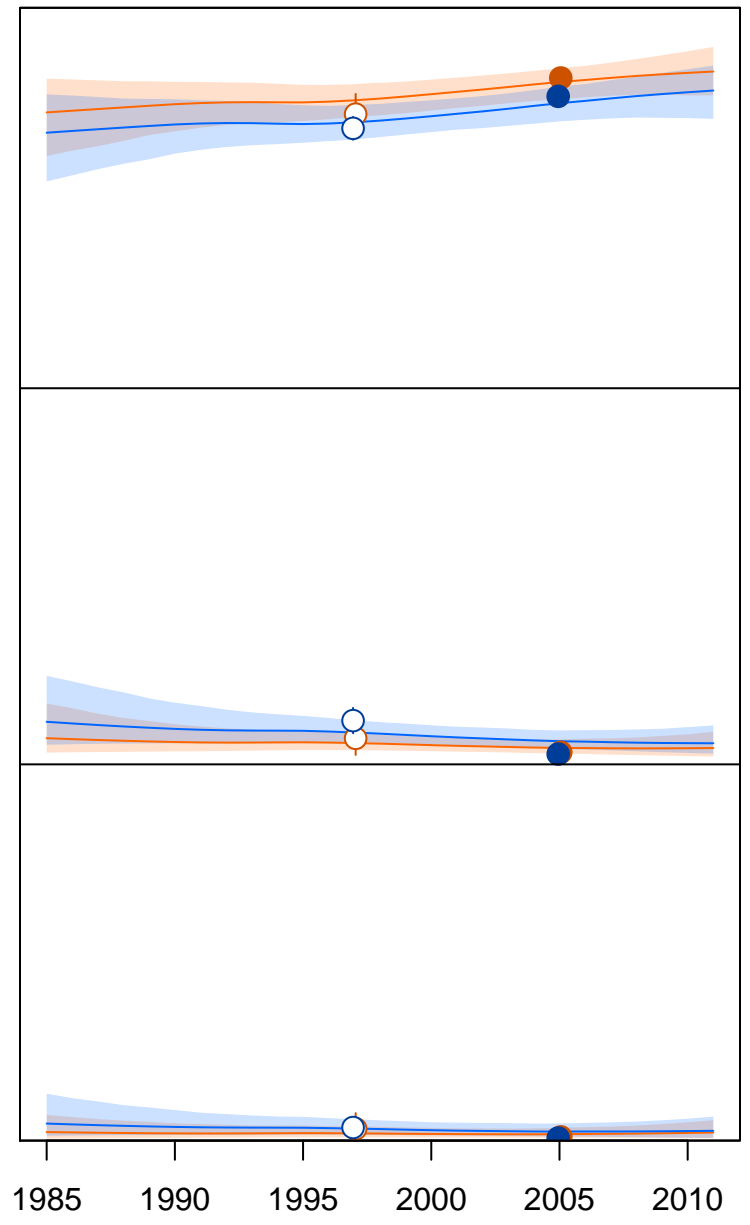

# Lao People's Democratic Republic

## East and Southeast Asia Region

117

### HAZ

### WAZ

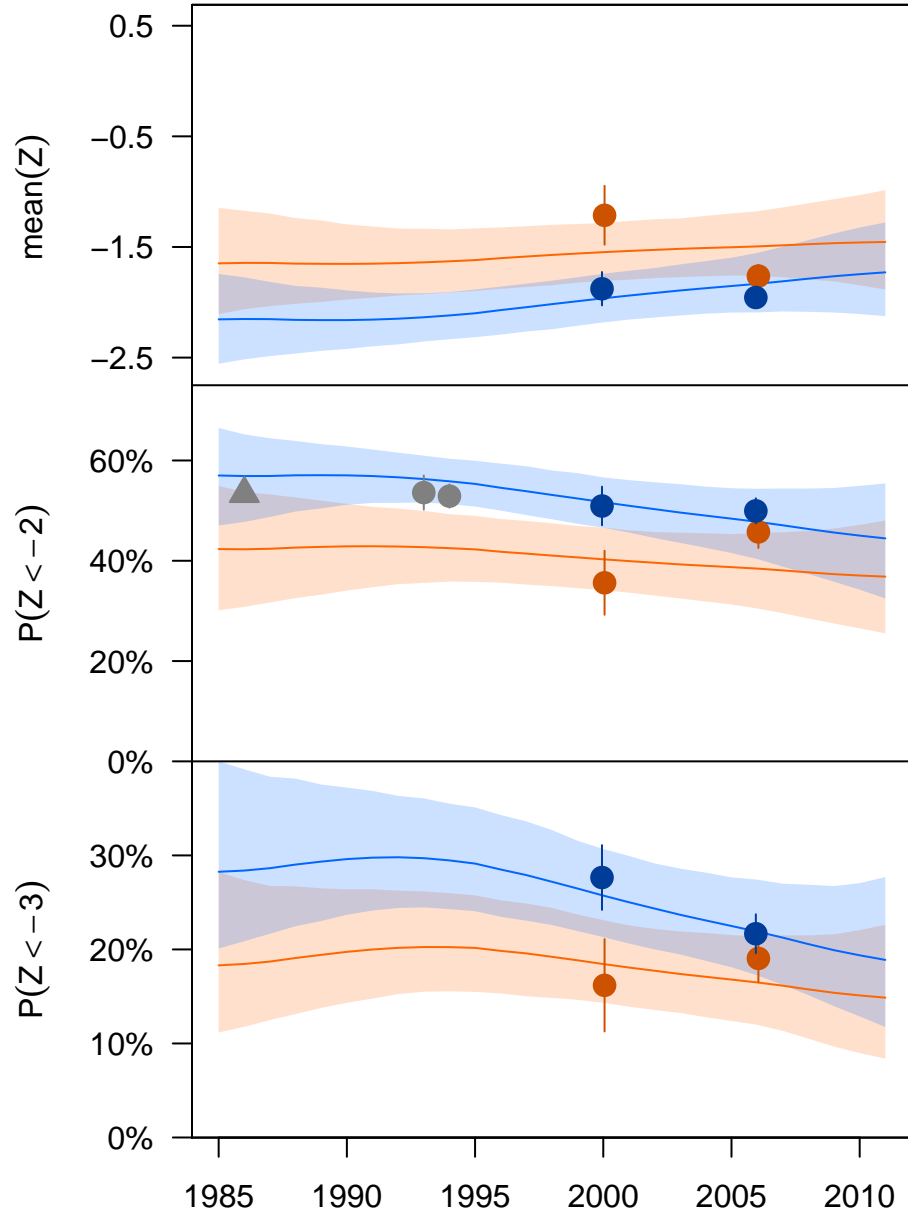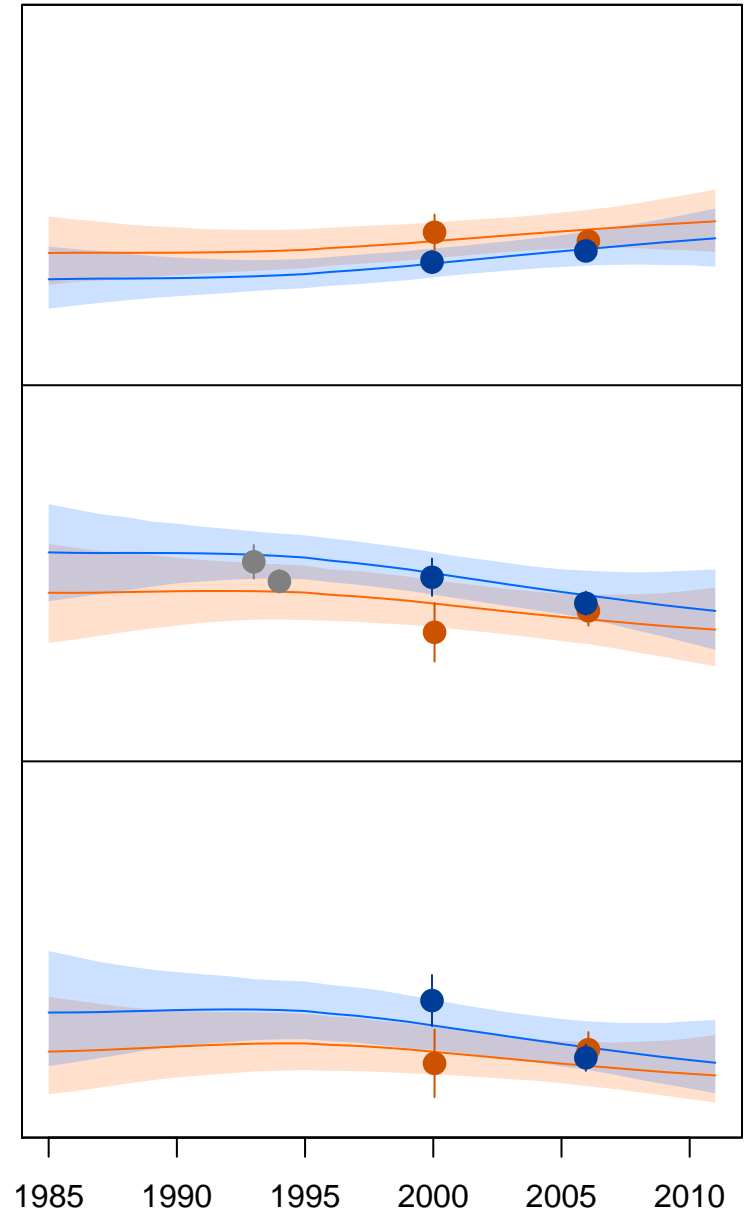

# Lebanon

Central Asia, Middle East, and North Africa Region

118

### HAZ

### WAZ

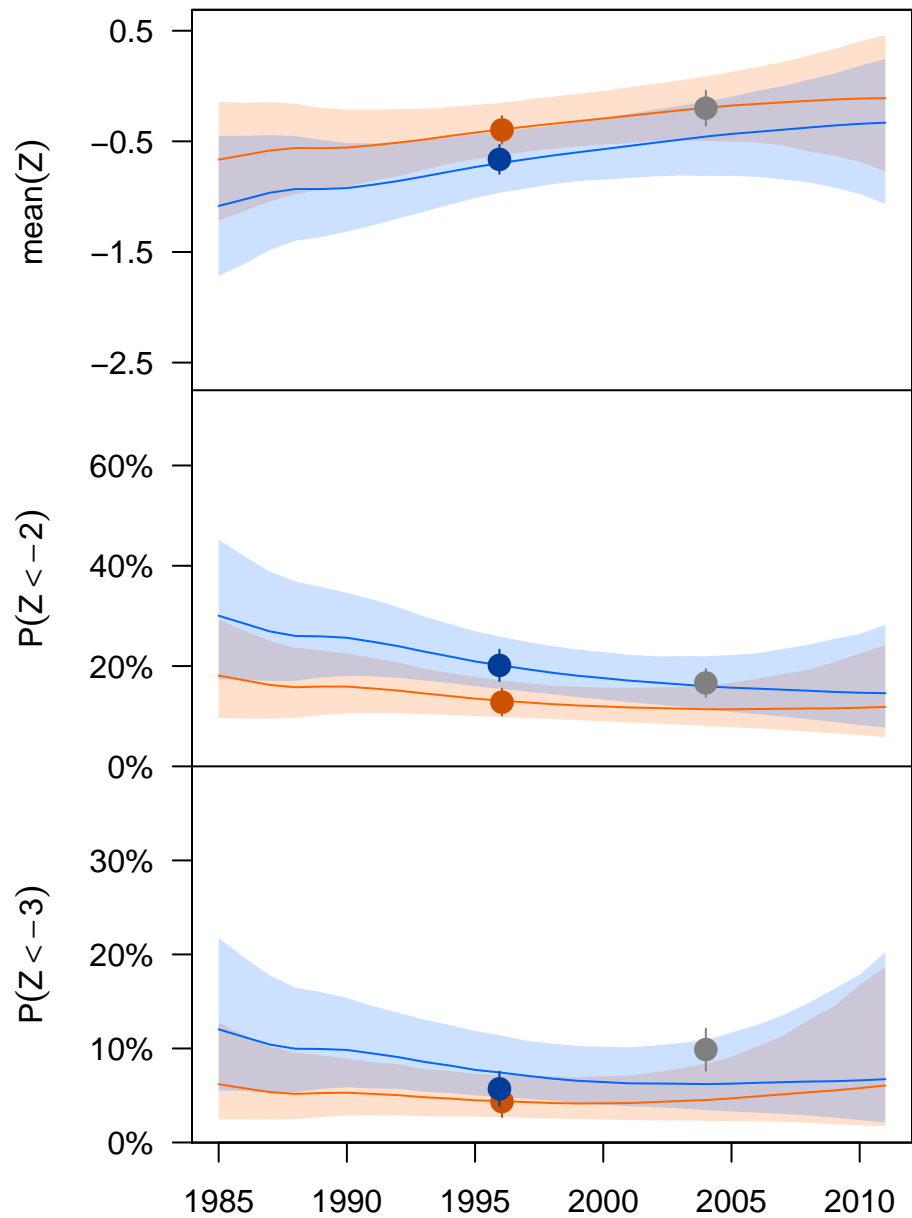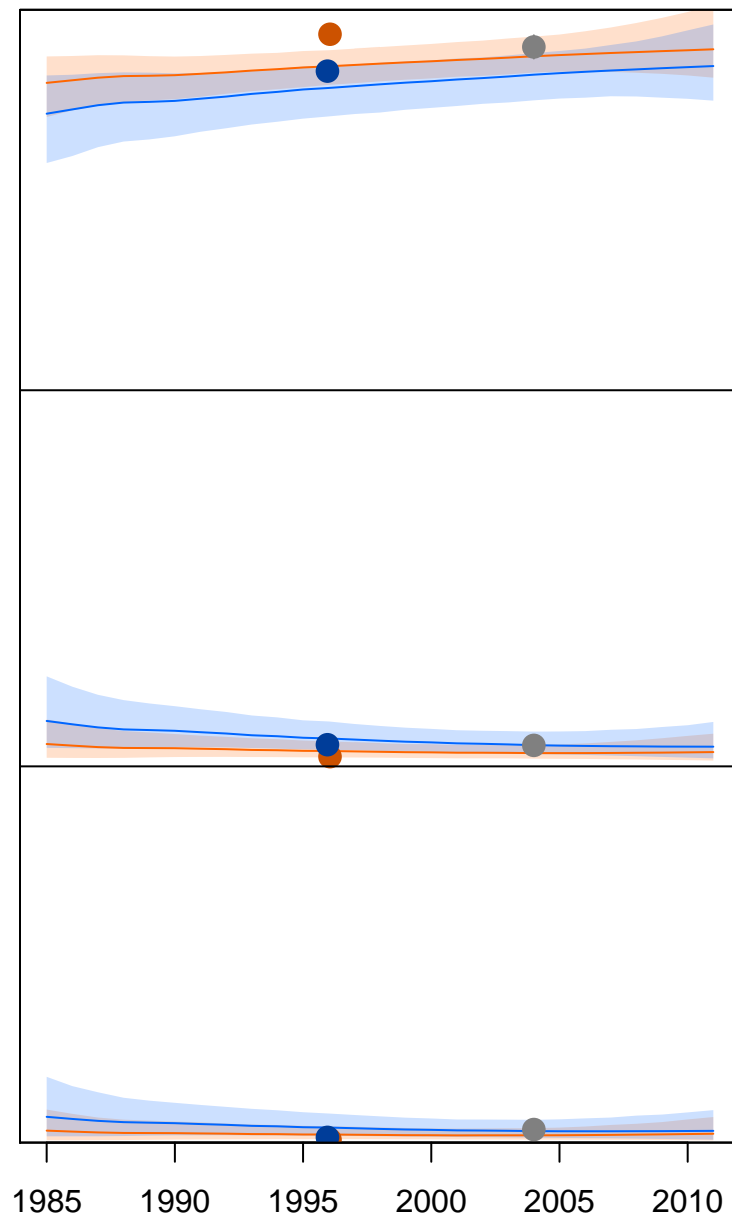

# Lesotho

## Sub-Saharan Africa Region

119

### HAZ

### WAZ

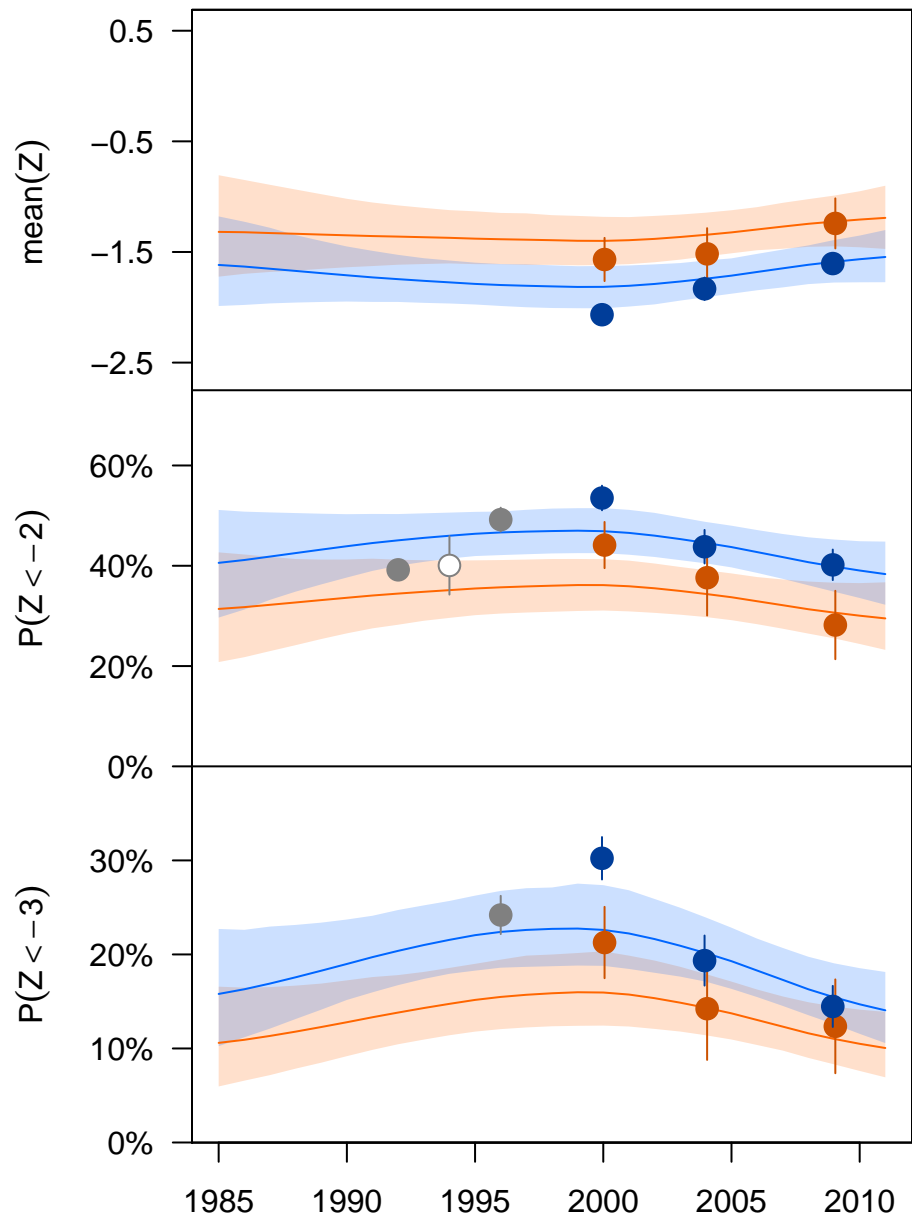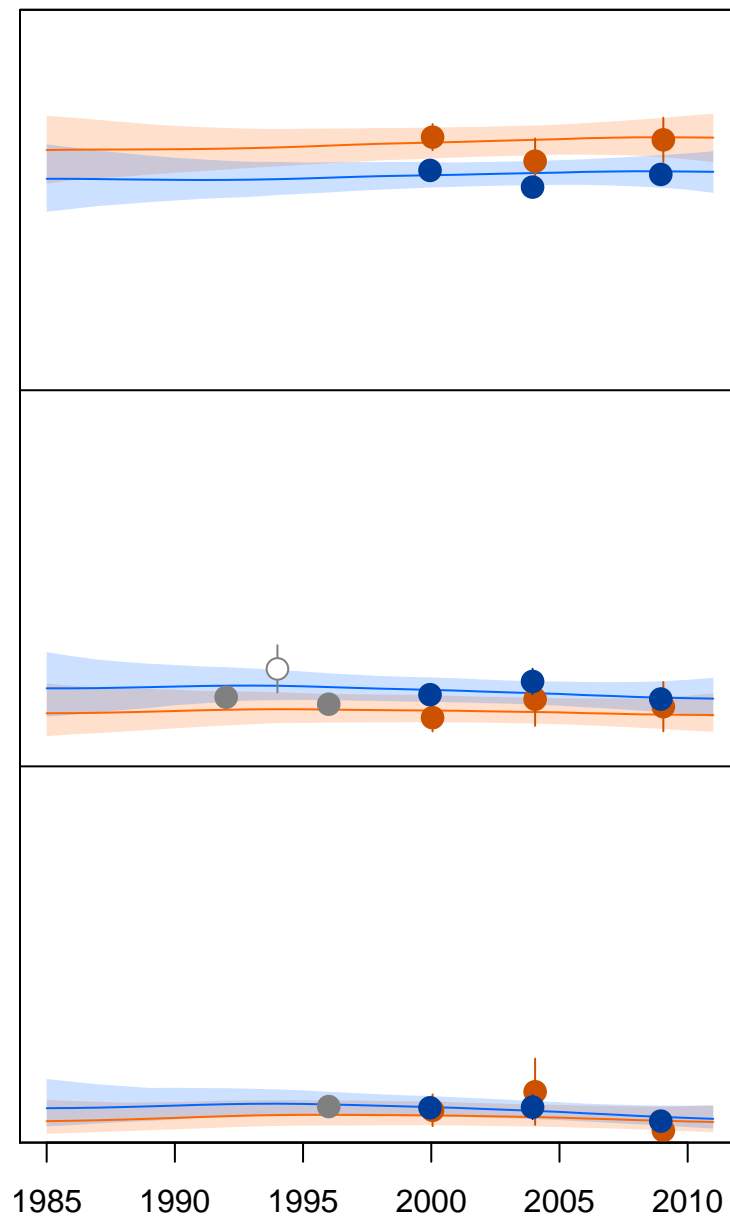



# Liberia

## Sub-Saharan Africa Region

120

### HAZ

### WAZ

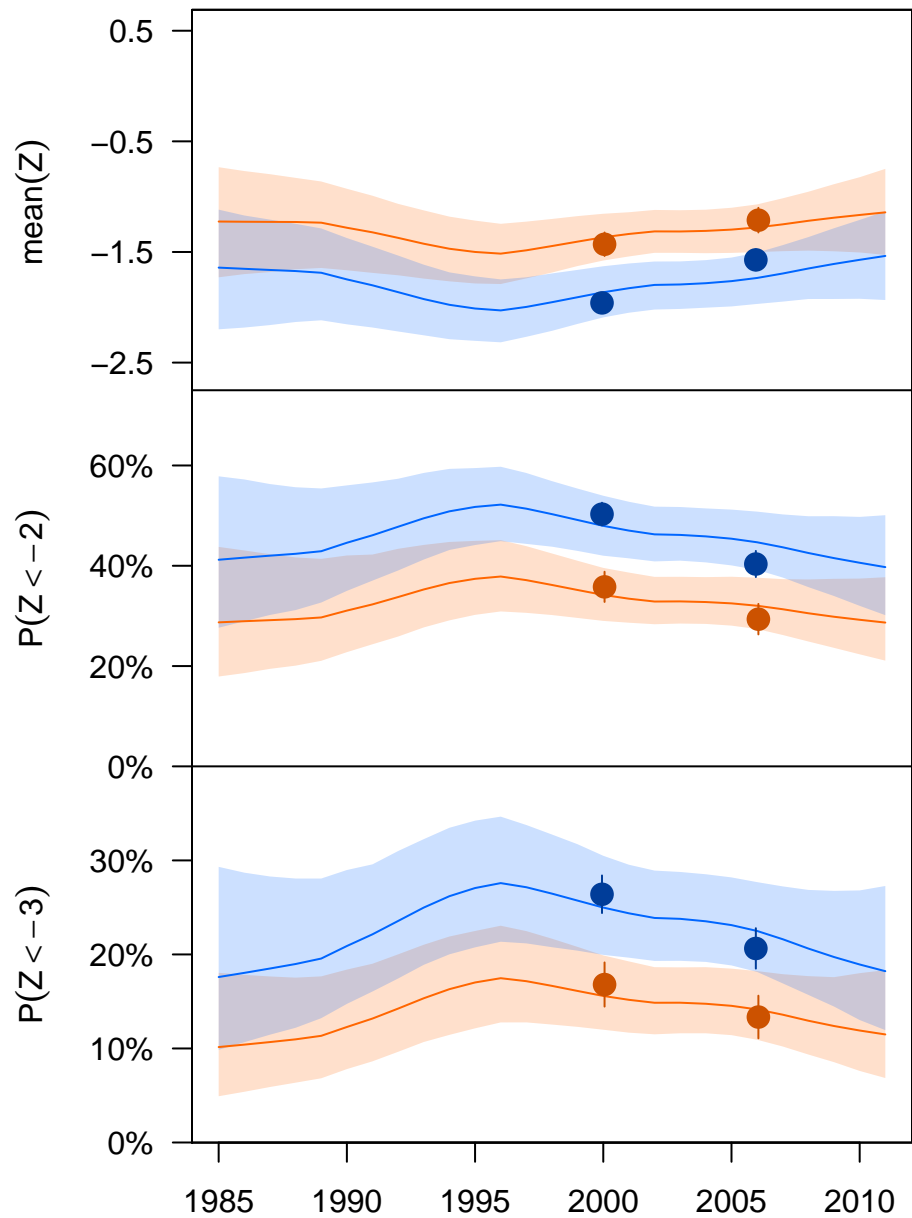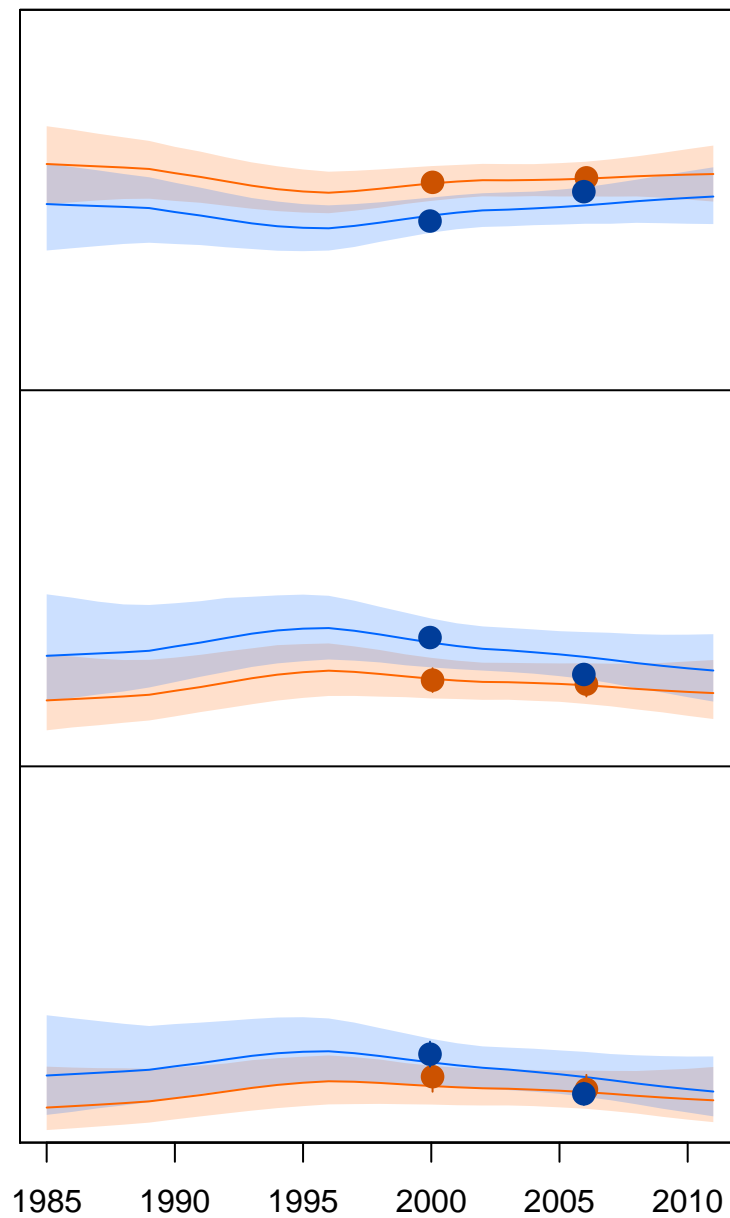

# Libyan Arab Jamahiriya

Central Asia, Middle East, and North Africa Region

### HAZ

### WAZ

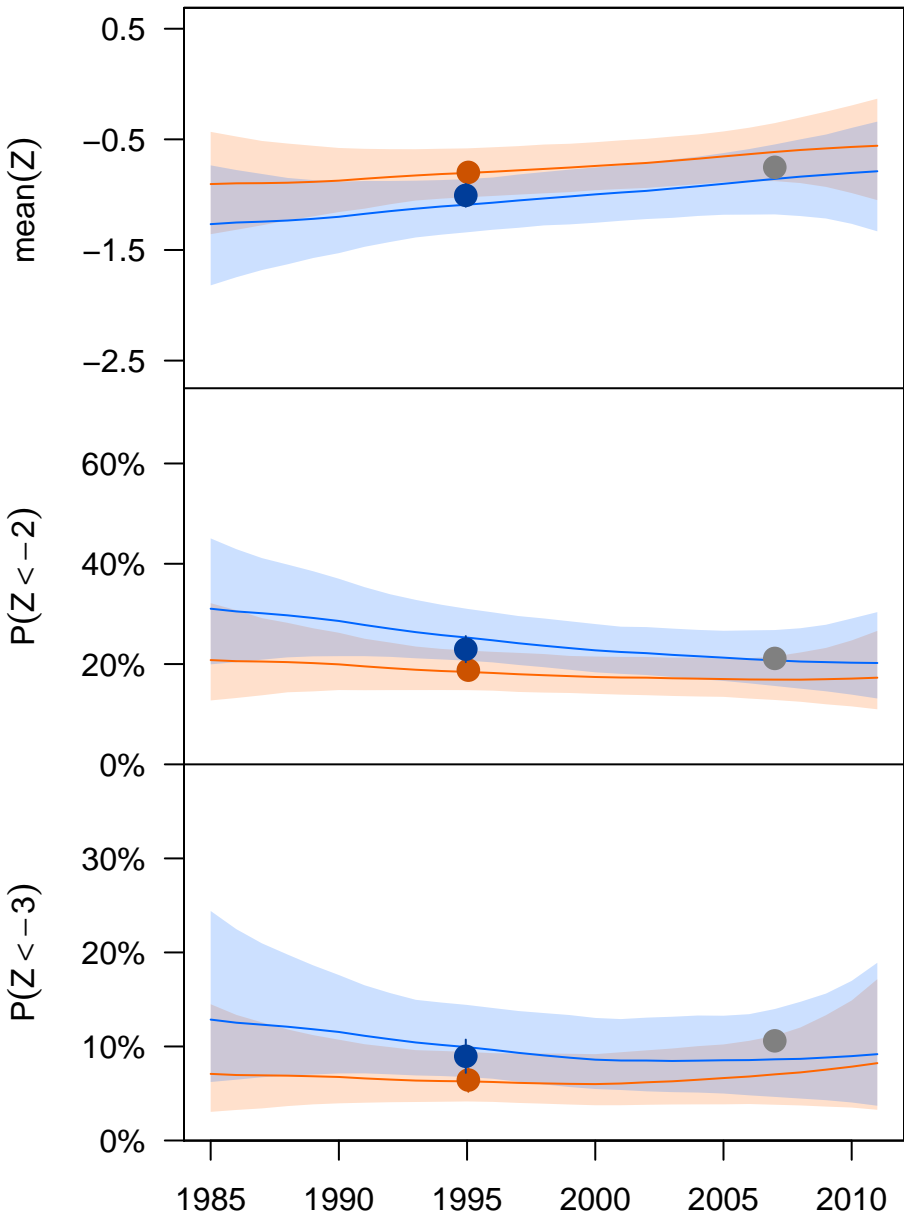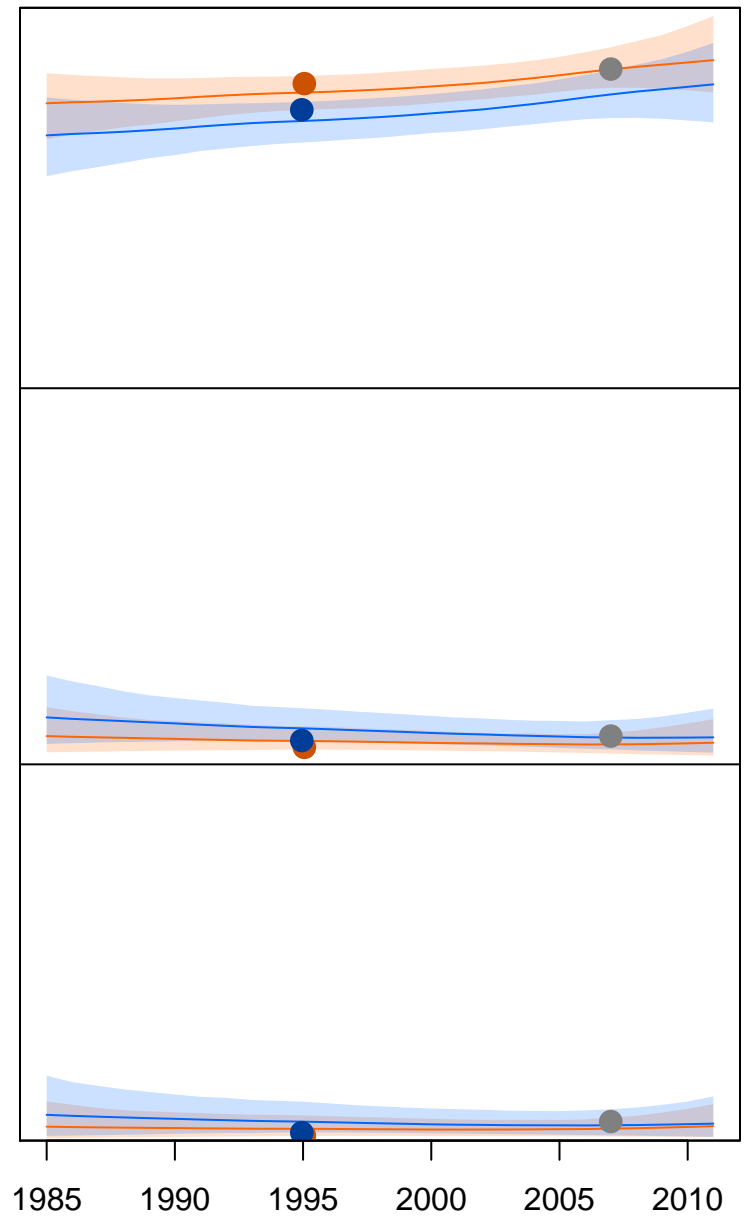

# Madagascar

## Sub-Saharan Africa Region

HAZ

WAZ

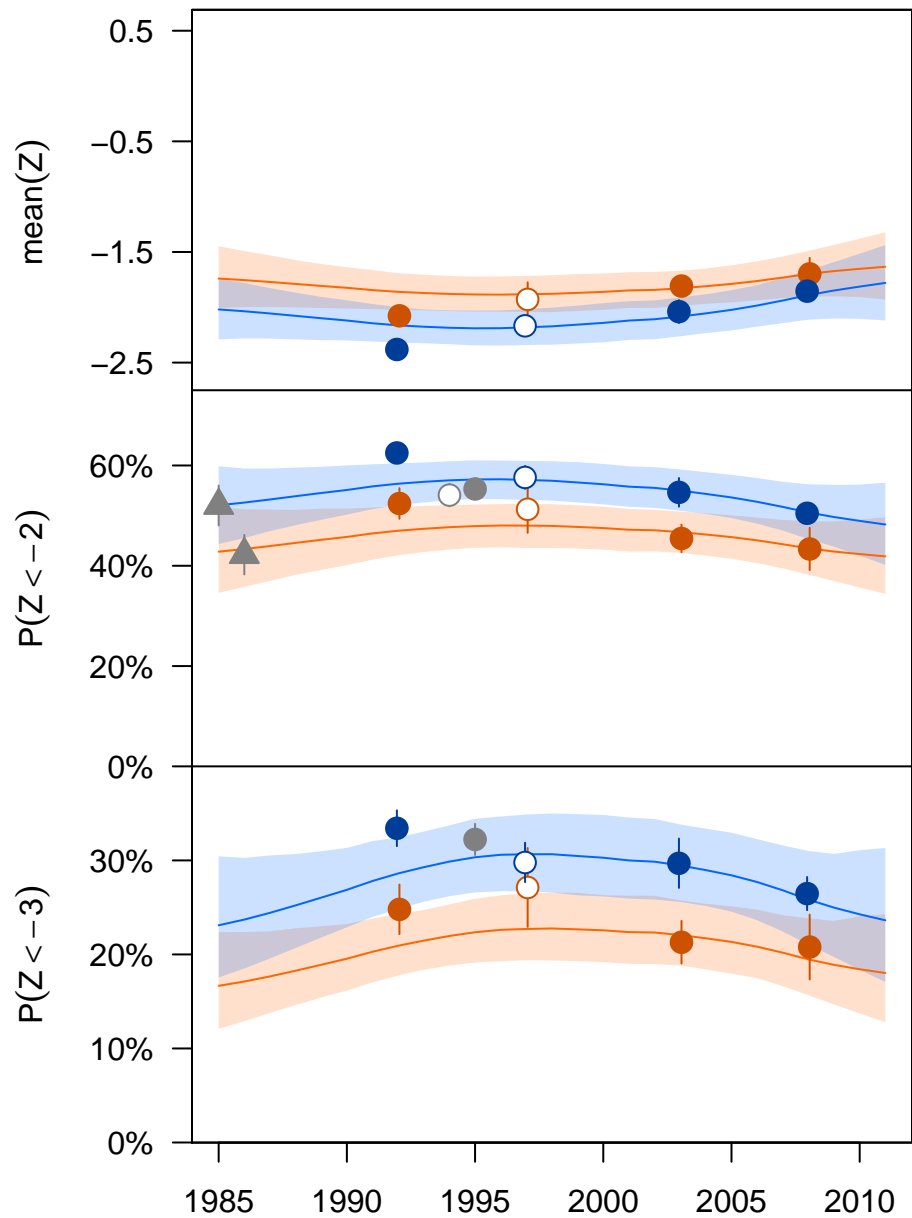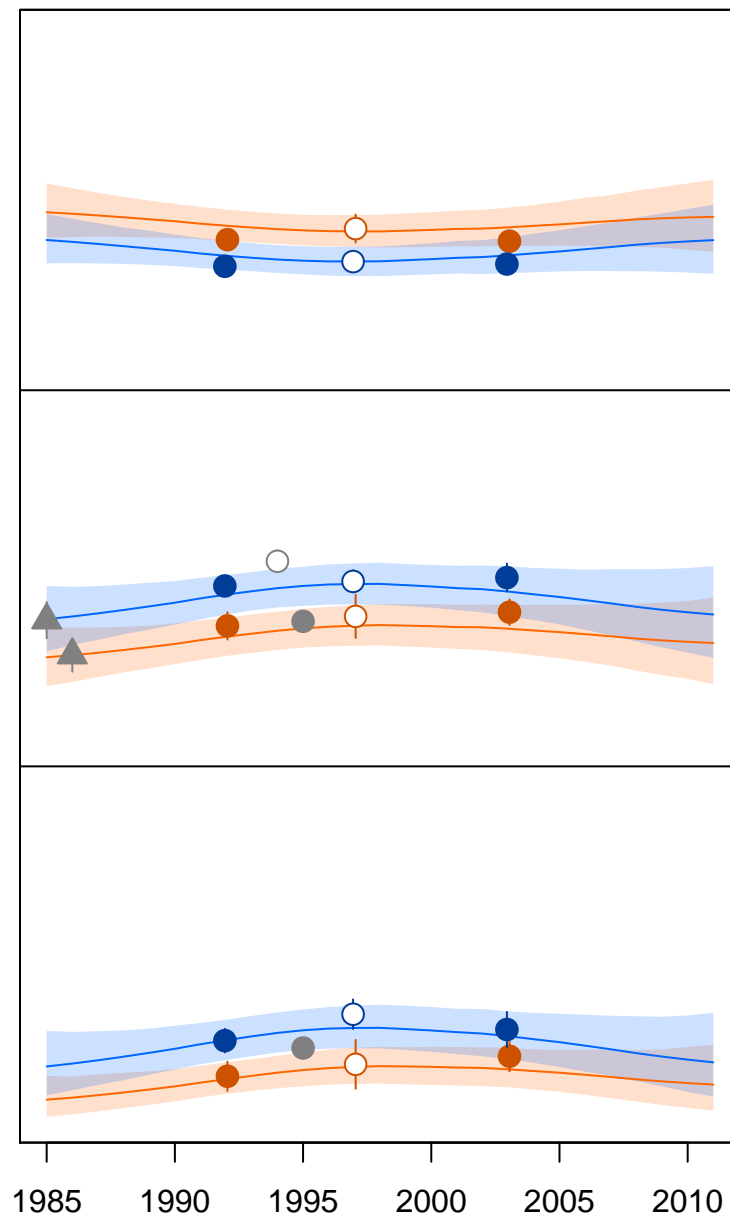

# Malawi

## Sub-Saharan Africa Region

### HAZ

### WAZ

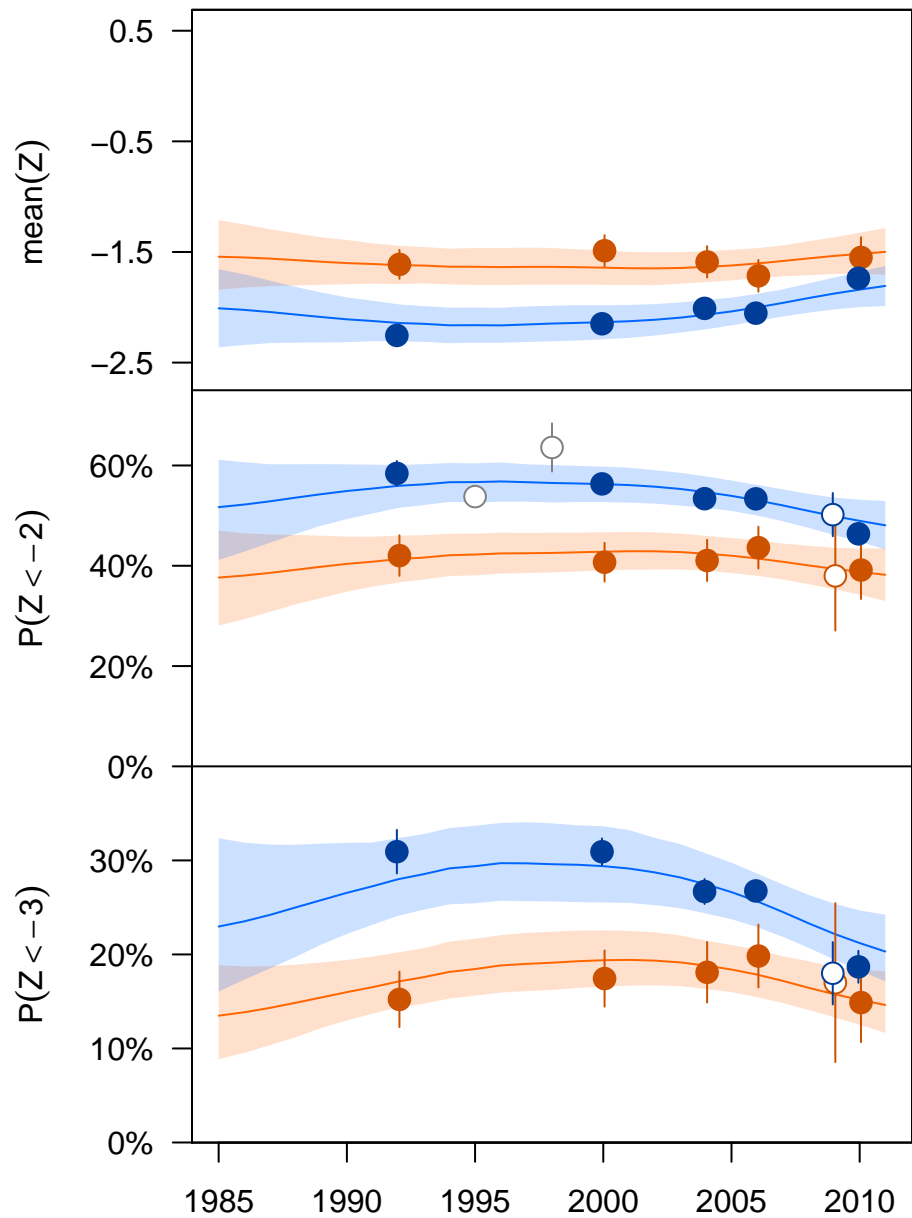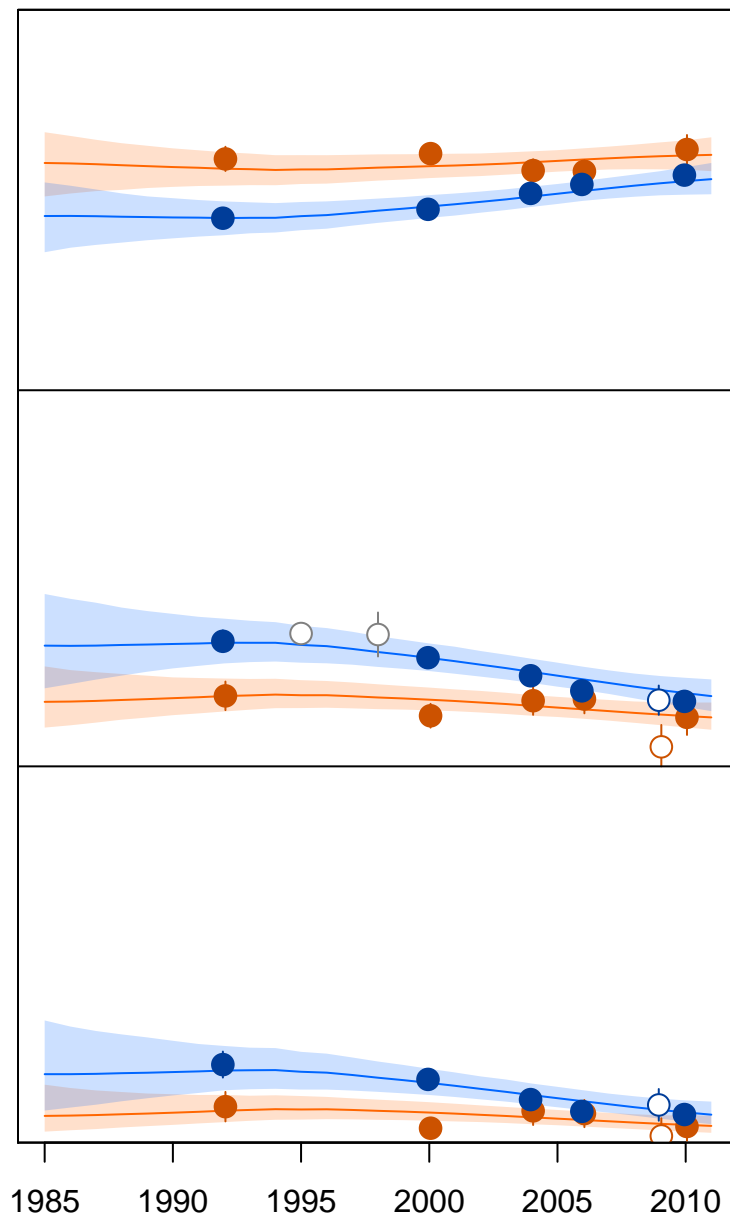

# Malaysia

East and Southeast Asia Region

## HAZ

## WAZ

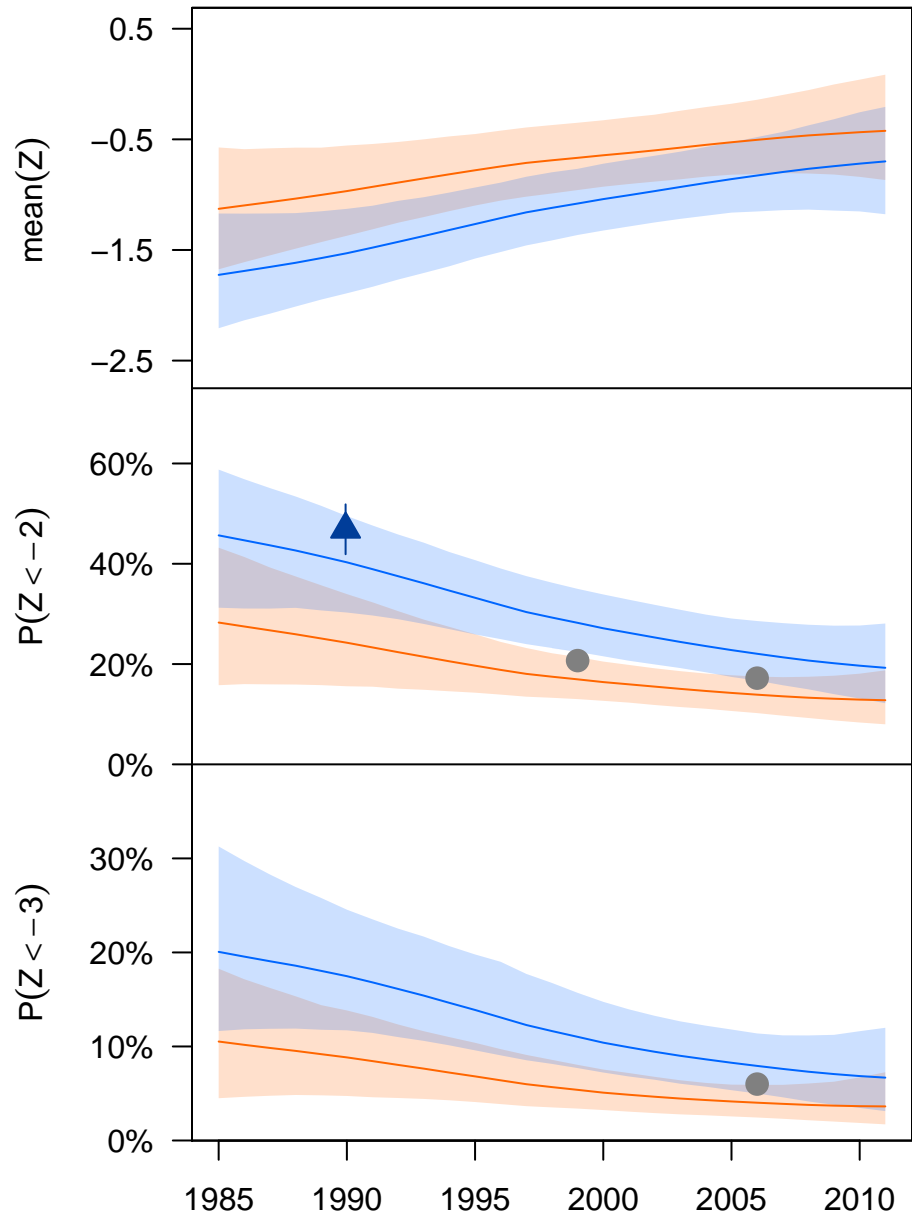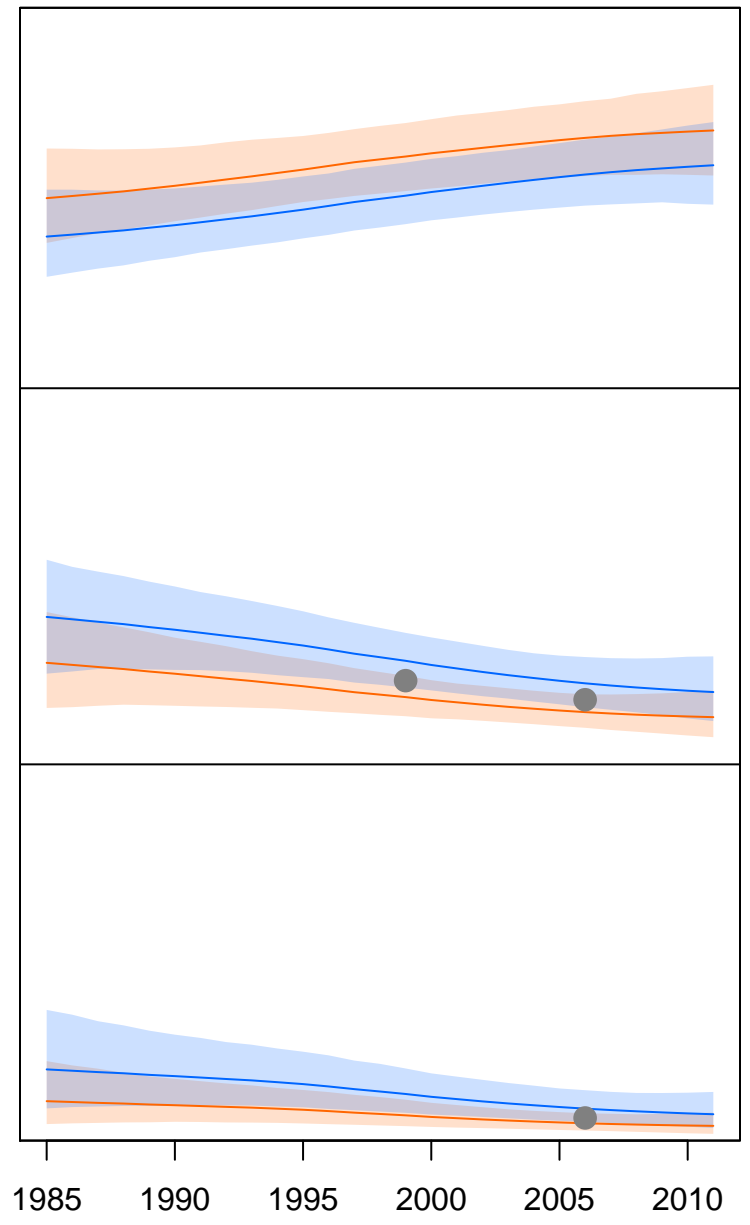

# Maldives

## East and Southeast Asia Region

### HAZ

### WAZ

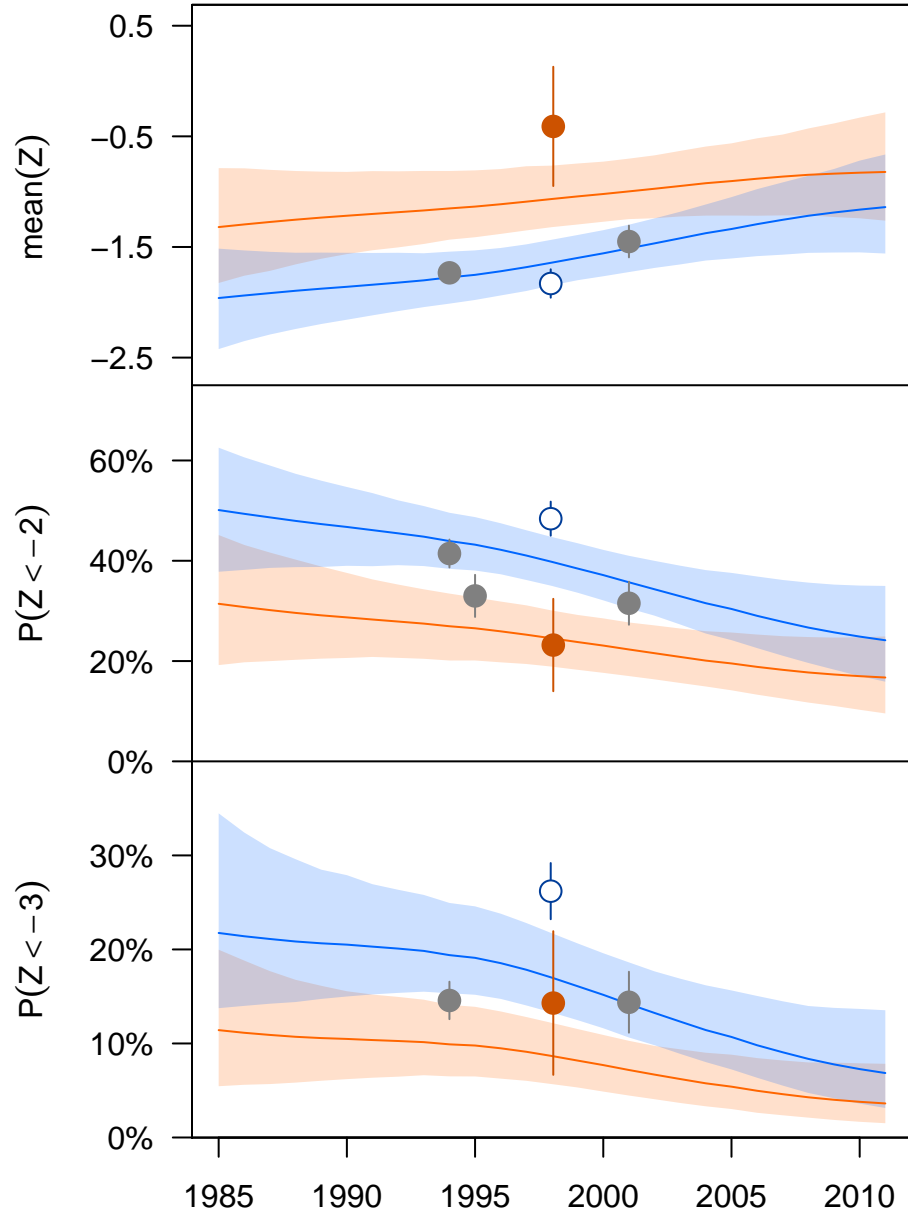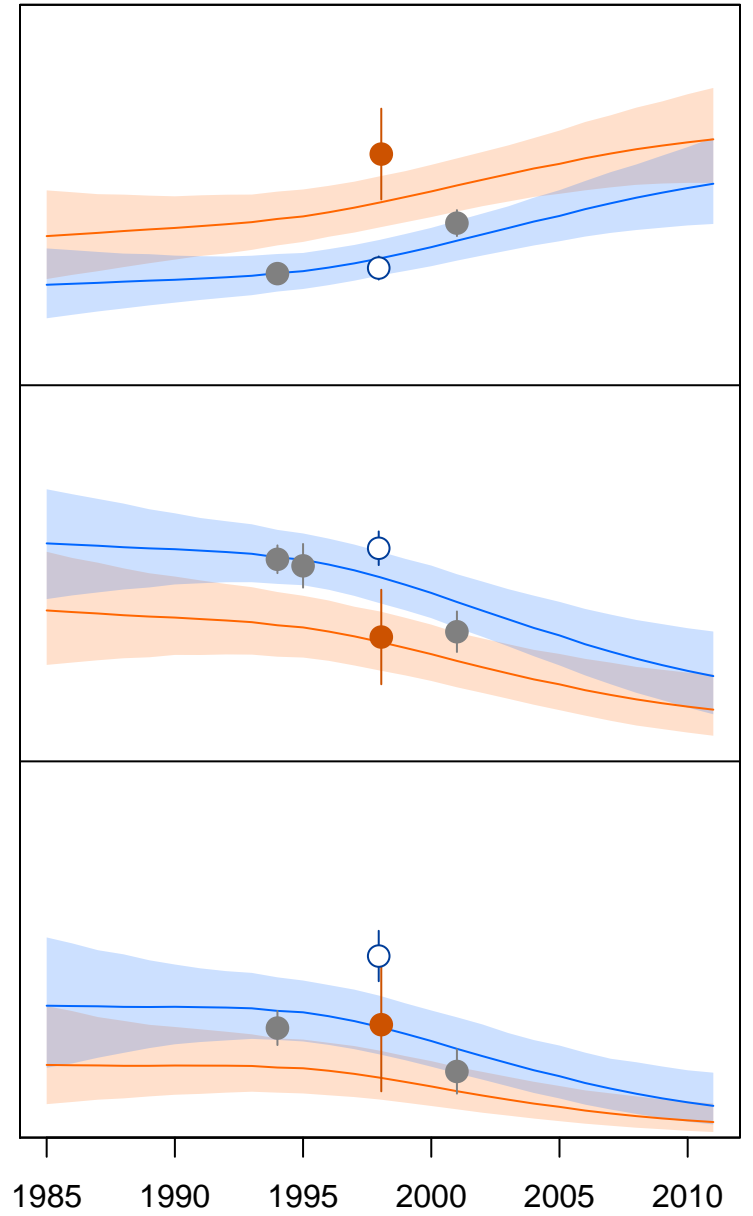

# Mali

## Sub-Saharan Africa Region

126

### HAZ

### WAZ

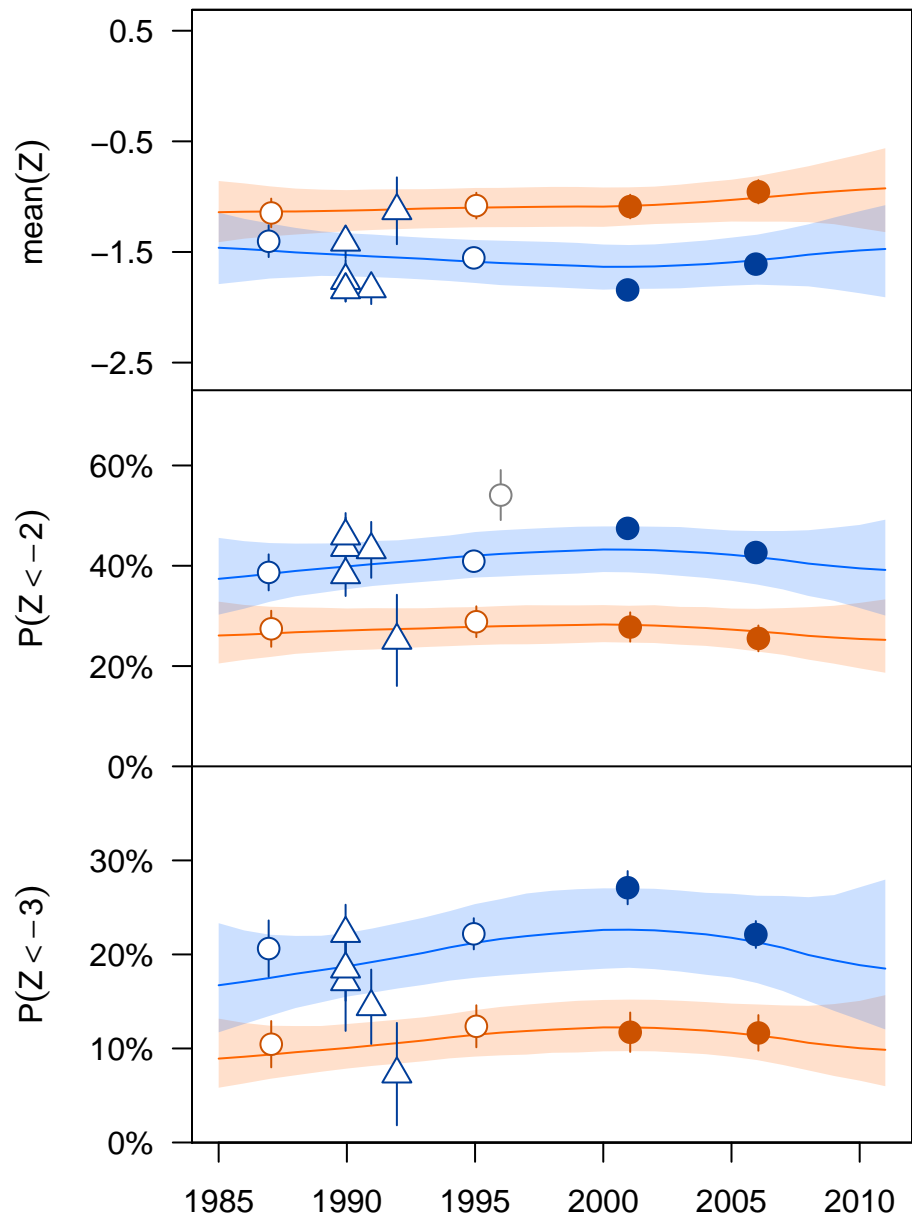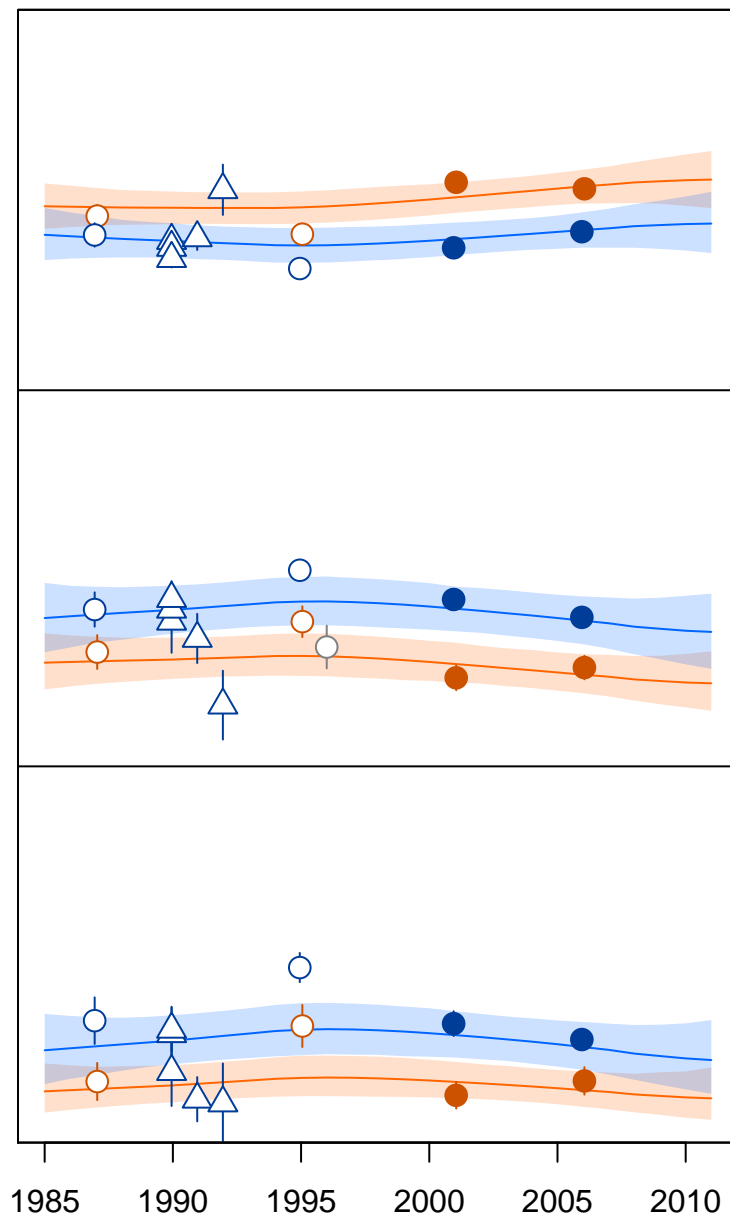

# Marshall Islands

Oceania Region

127

## HAZ

## WAZ

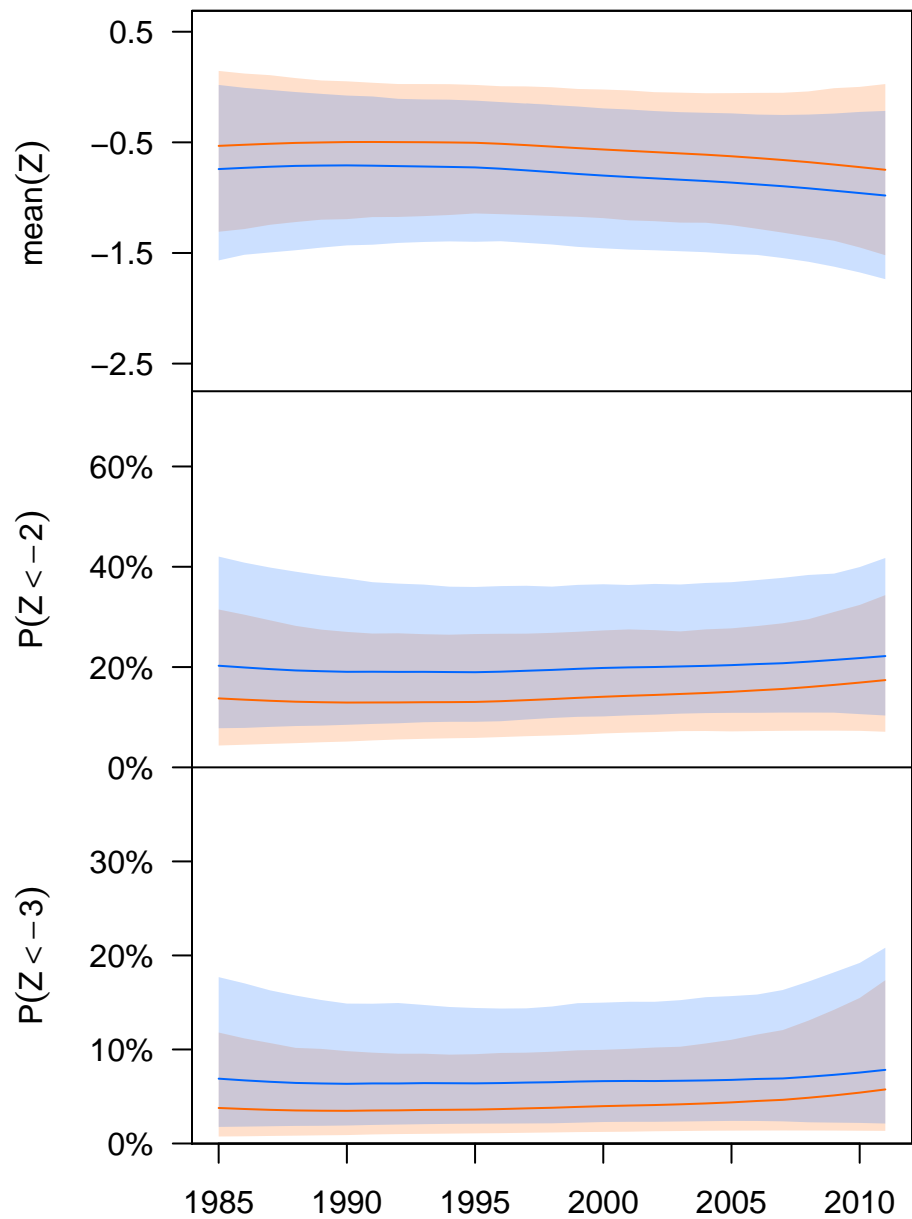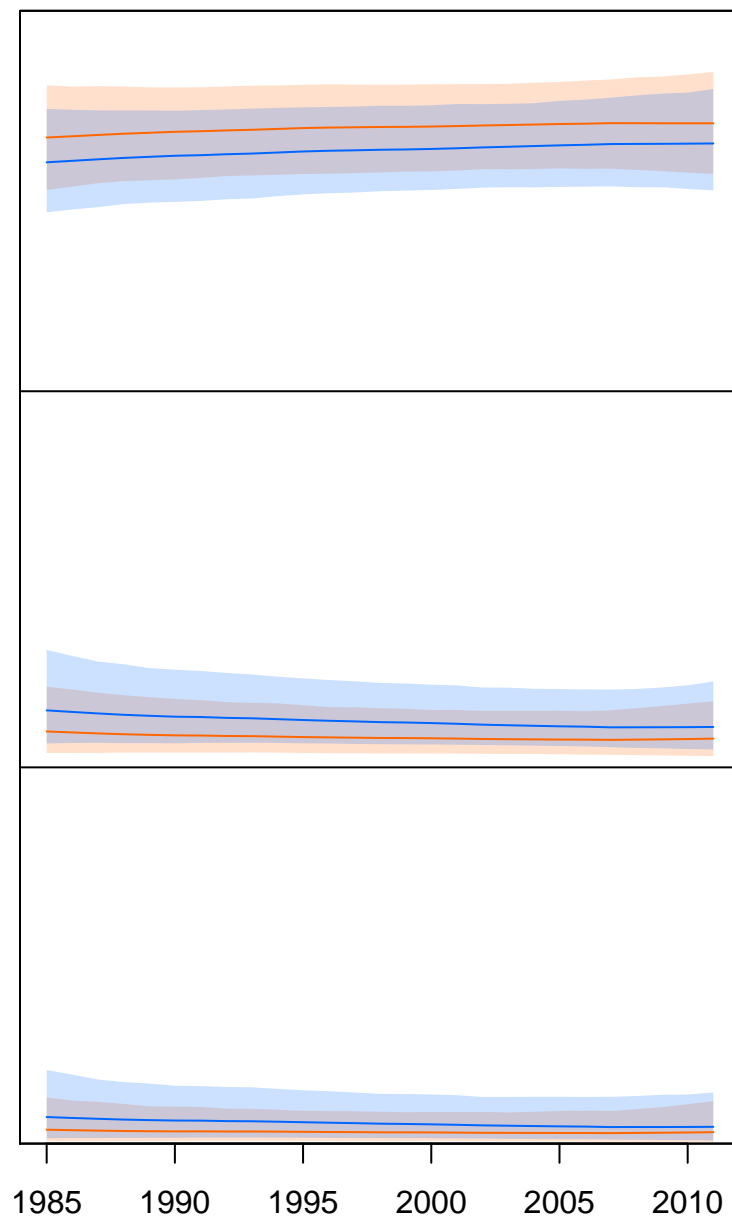



# Mauritania

Sub-Saharan Africa Region

## HAZ

## WAZ

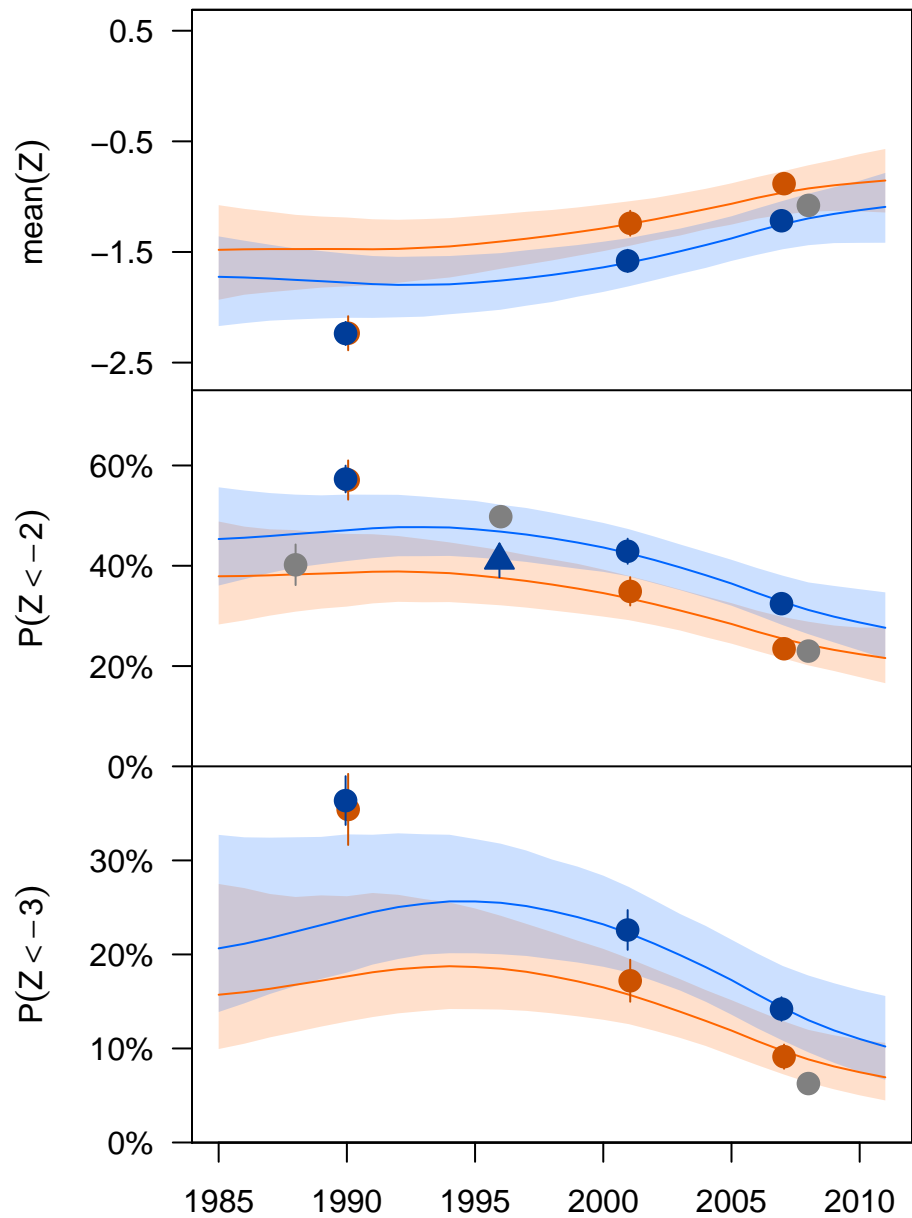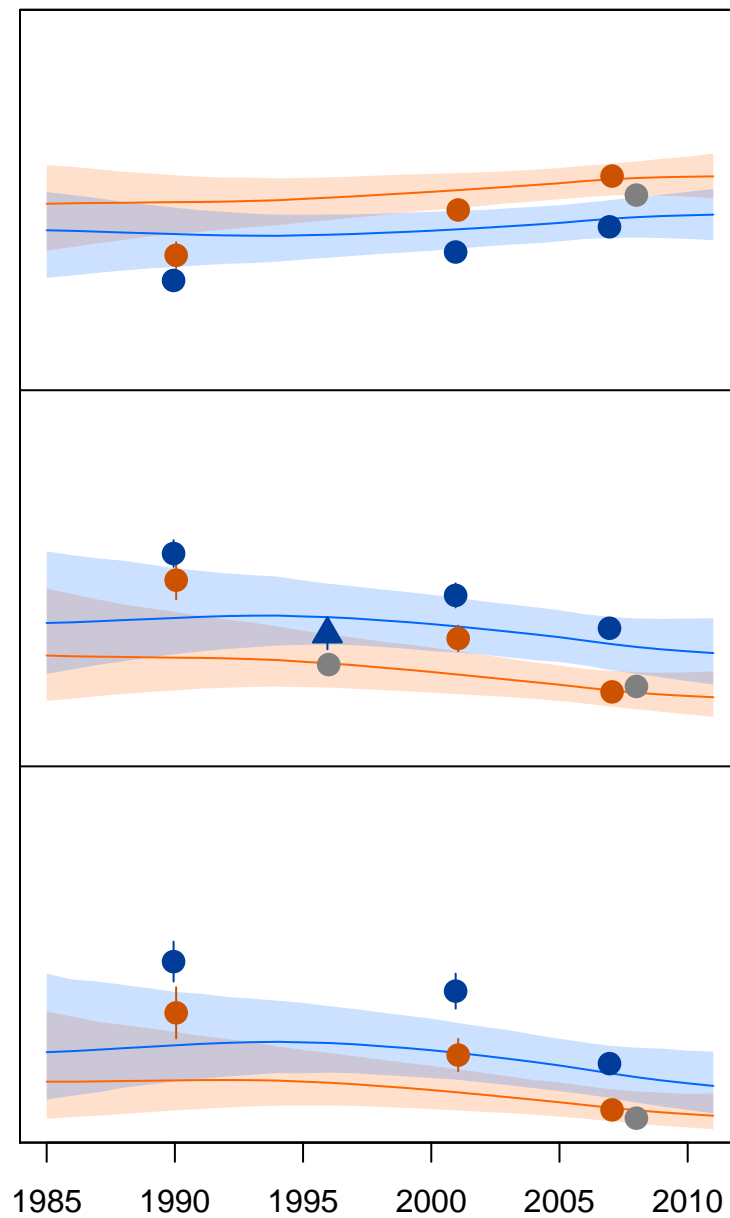

Mauritius  
Sub-Saharan Africa Region

HAZ

WAZ

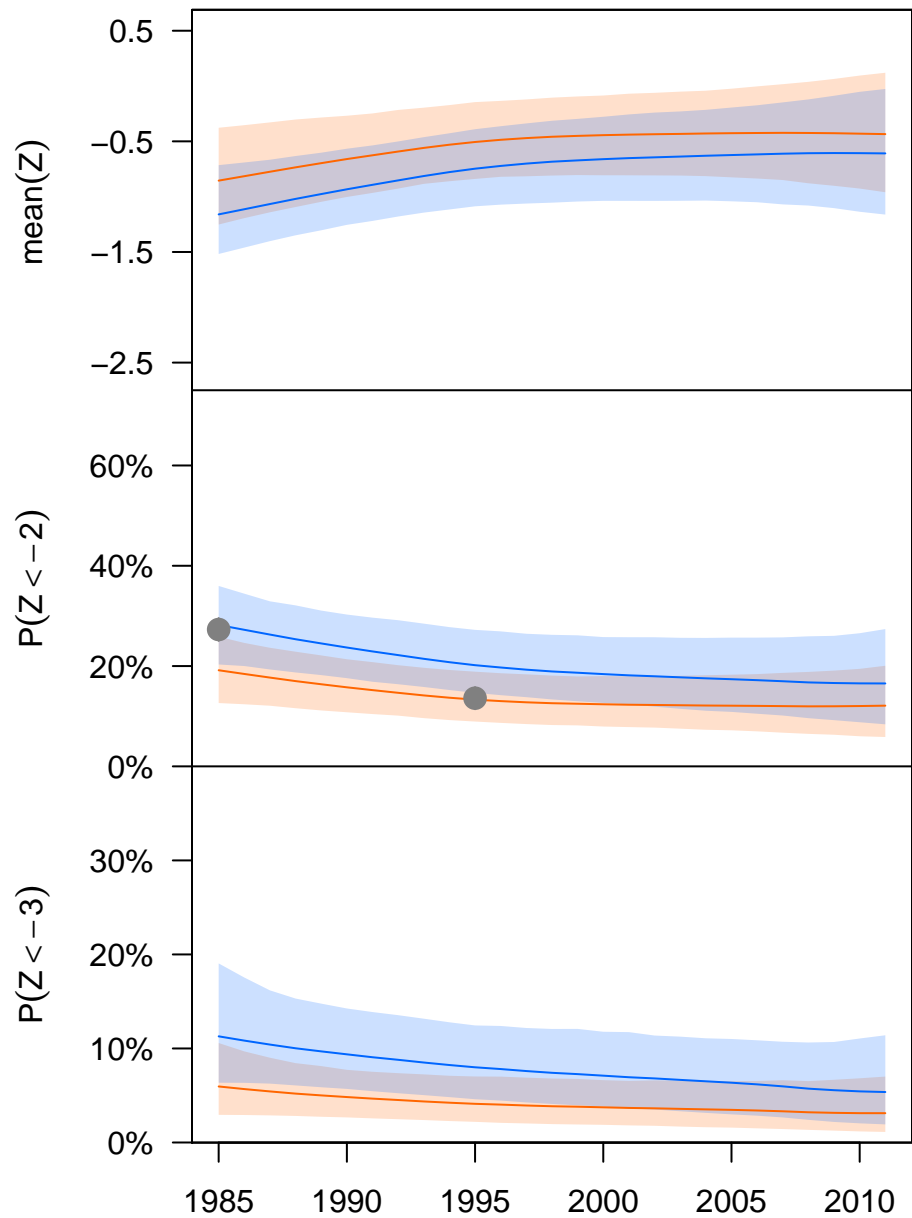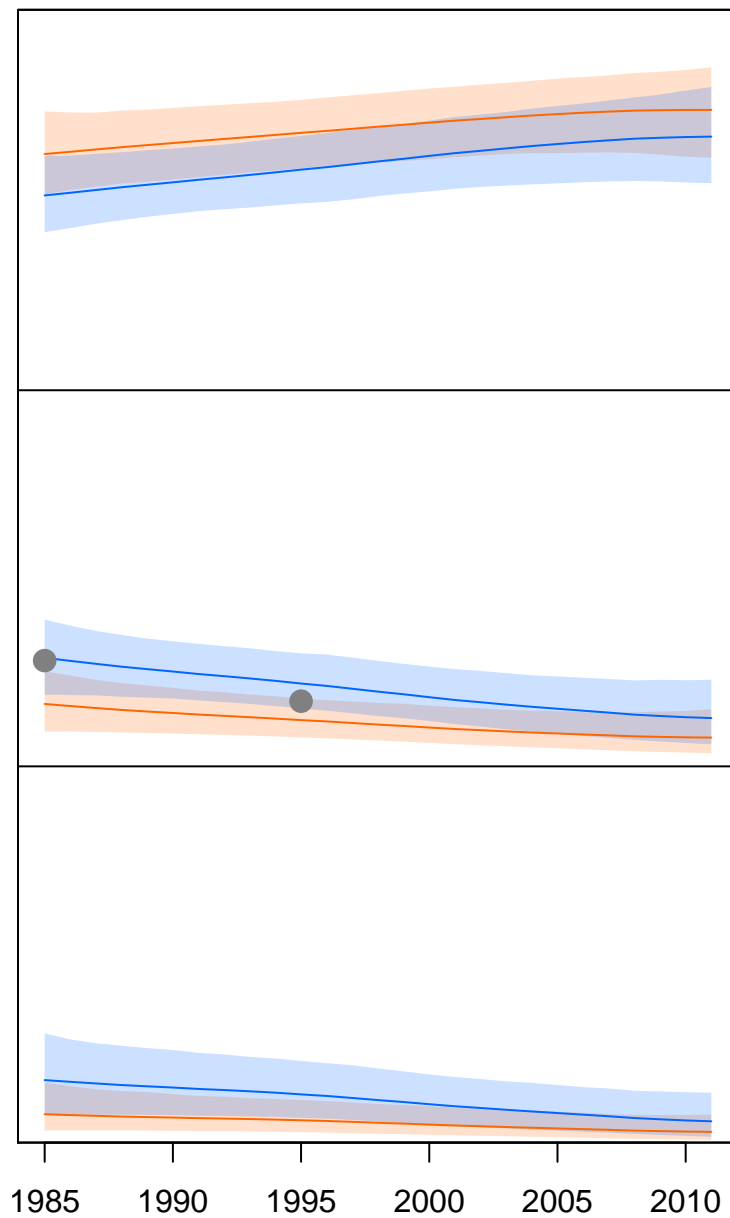

# Mexico

Andean and Central Latin America and Caribbean Region

## HAZ

## WAZ

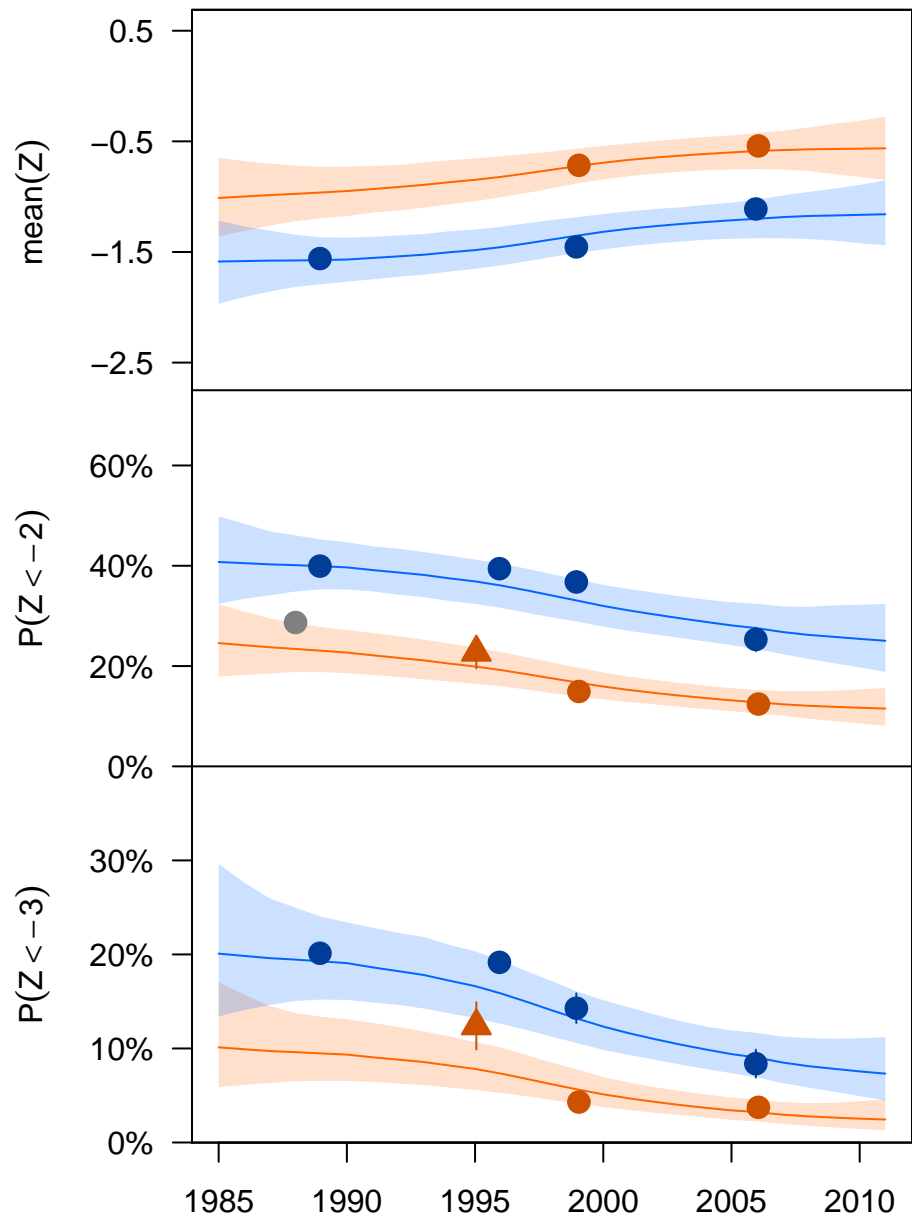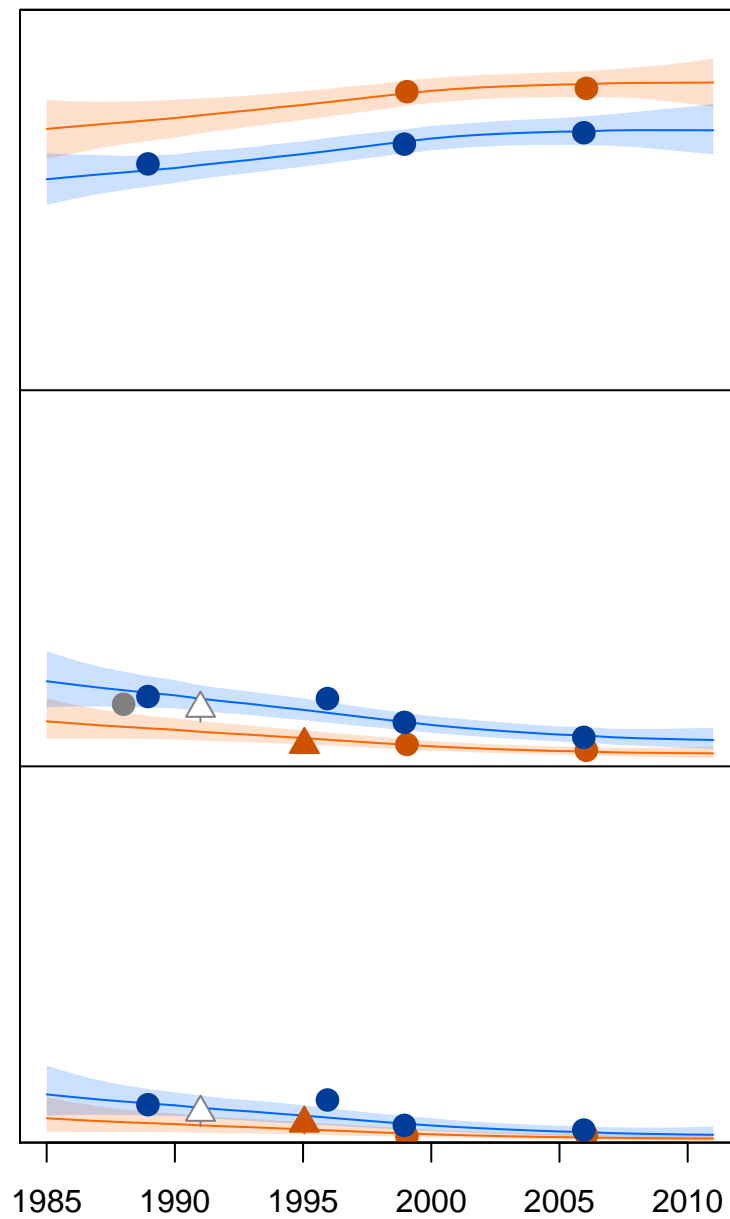

# Micronesia (Federated States of)

Oceania Region

131

## HAZ

## WAZ

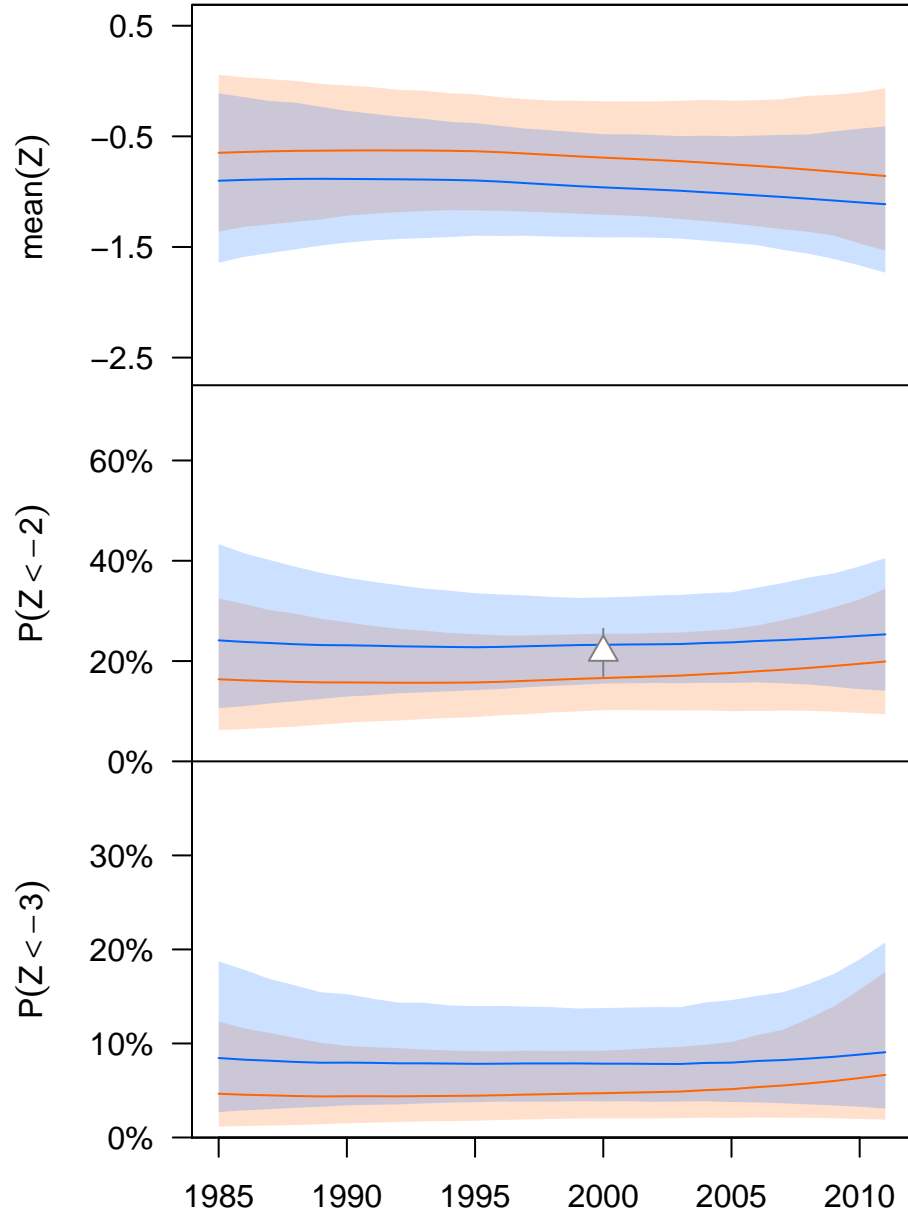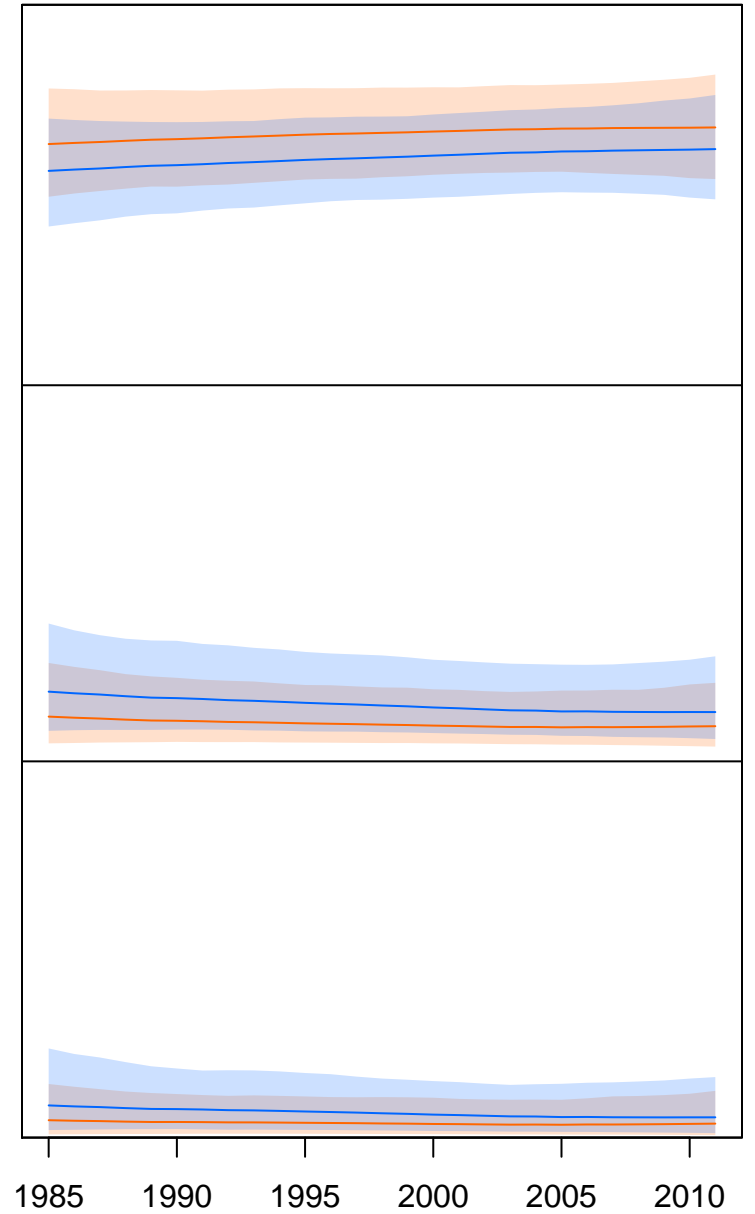

# Mongolia

## Central Asia, Middle East, and North Africa Region

**HAZ**

**WAZ**

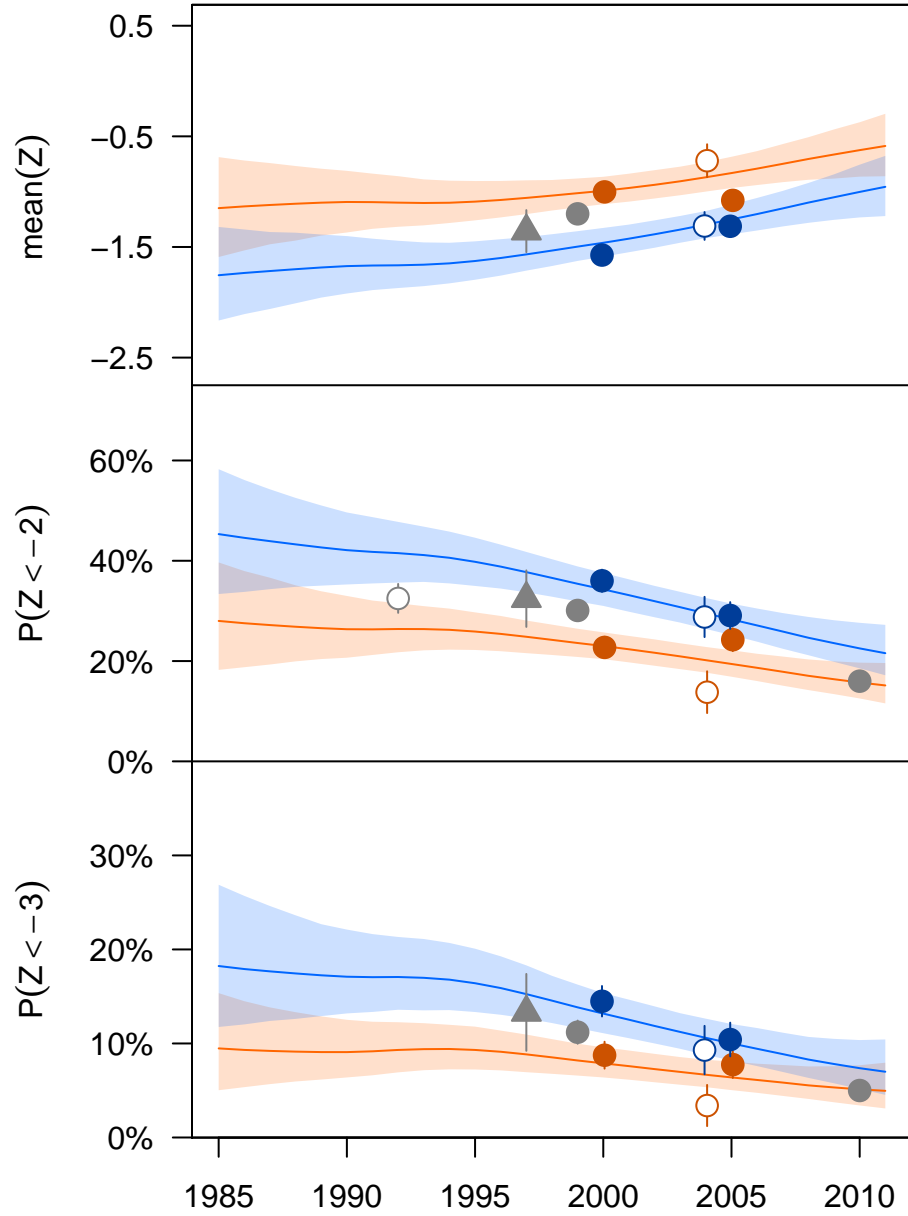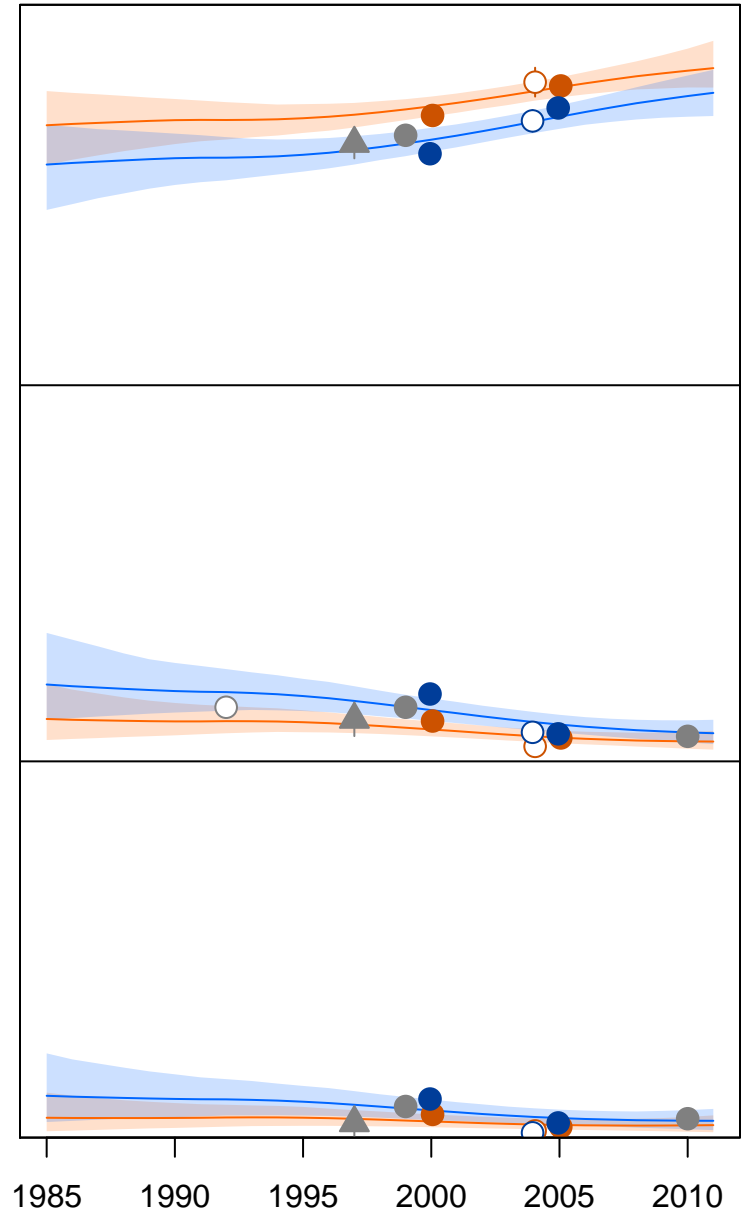

# Morocco

## Central Asia, Middle East, and North Africa Region

133

### HAZ

### WAZ

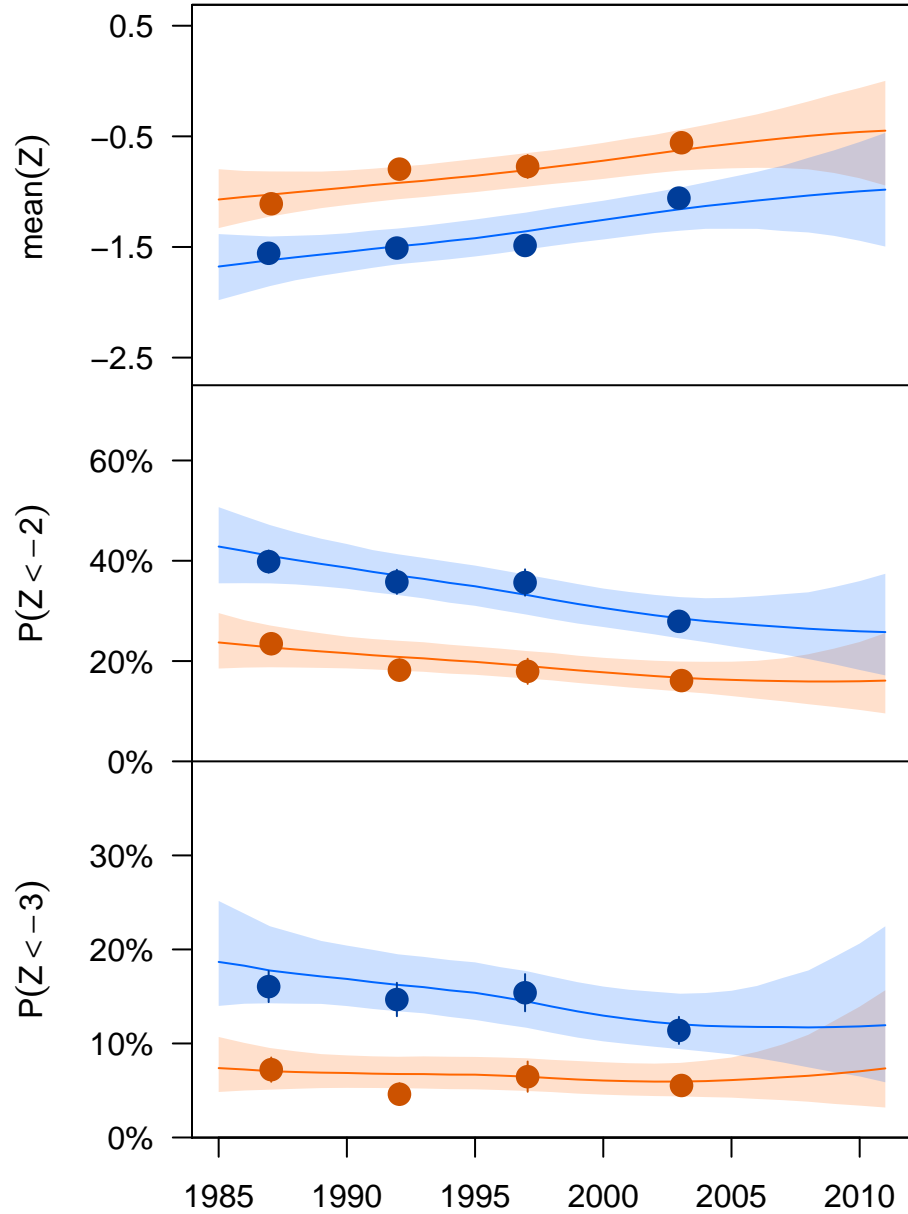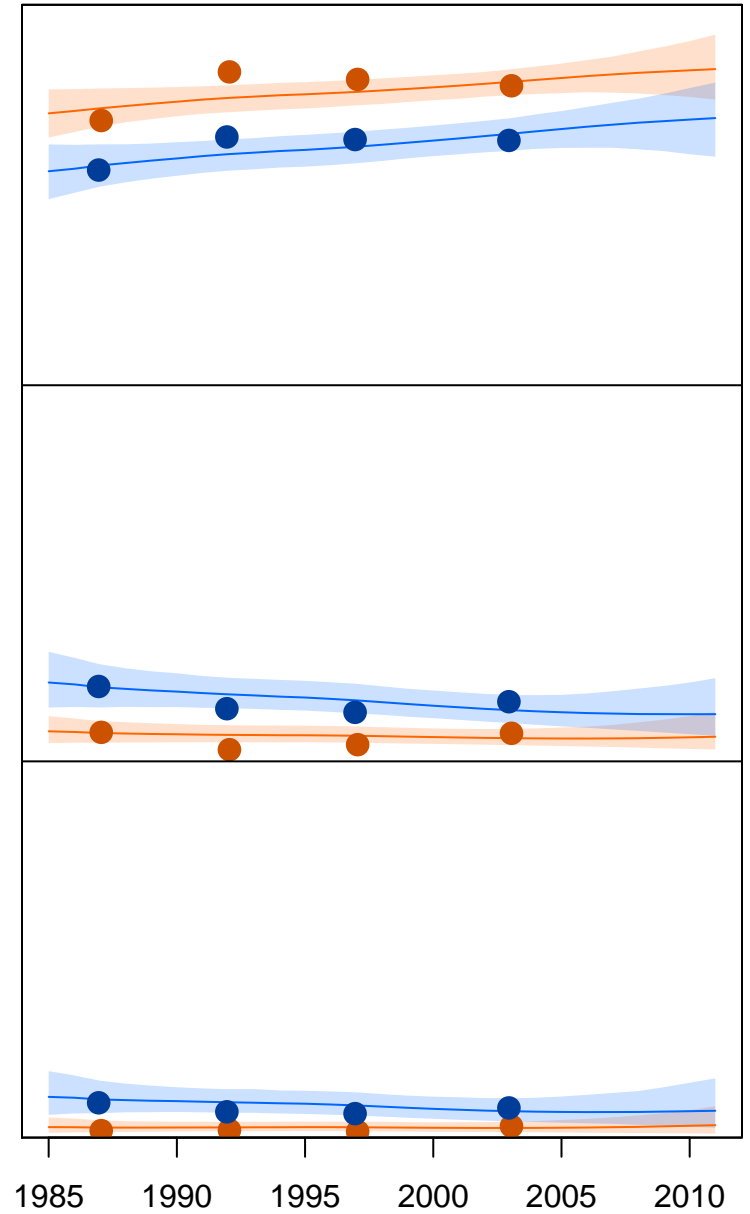

# Mozambique

## Sub-Saharan Africa Region

HAZ

WAZ

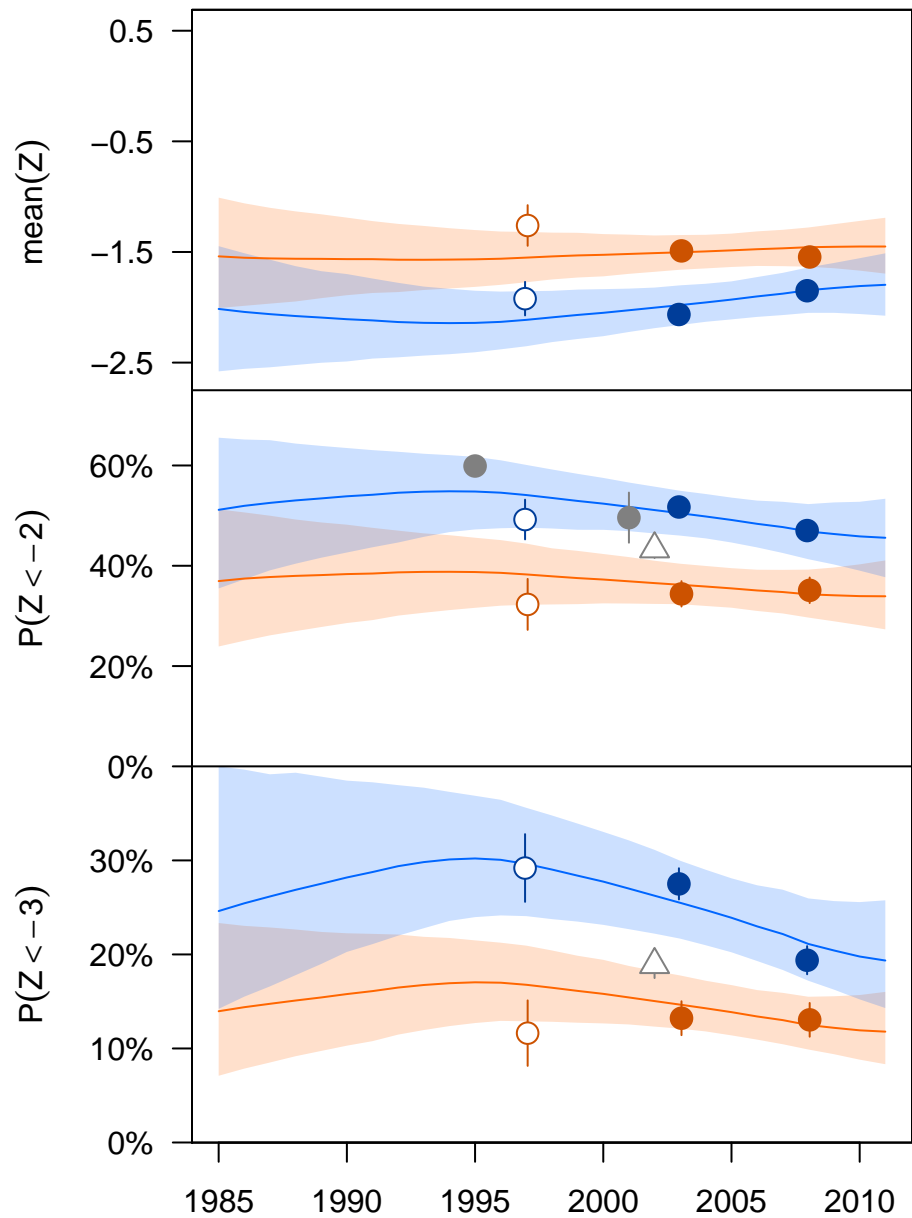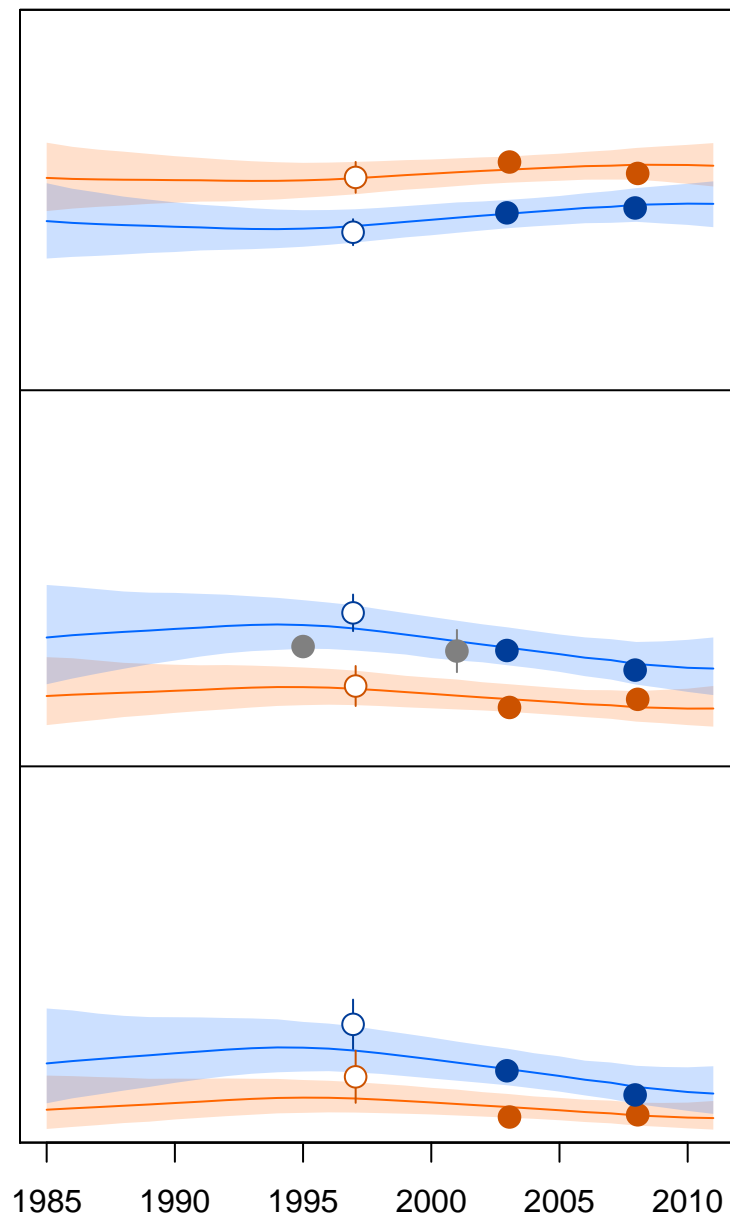

# Myanmar

East and Southeast Asia Region

### HAZ

### WAZ

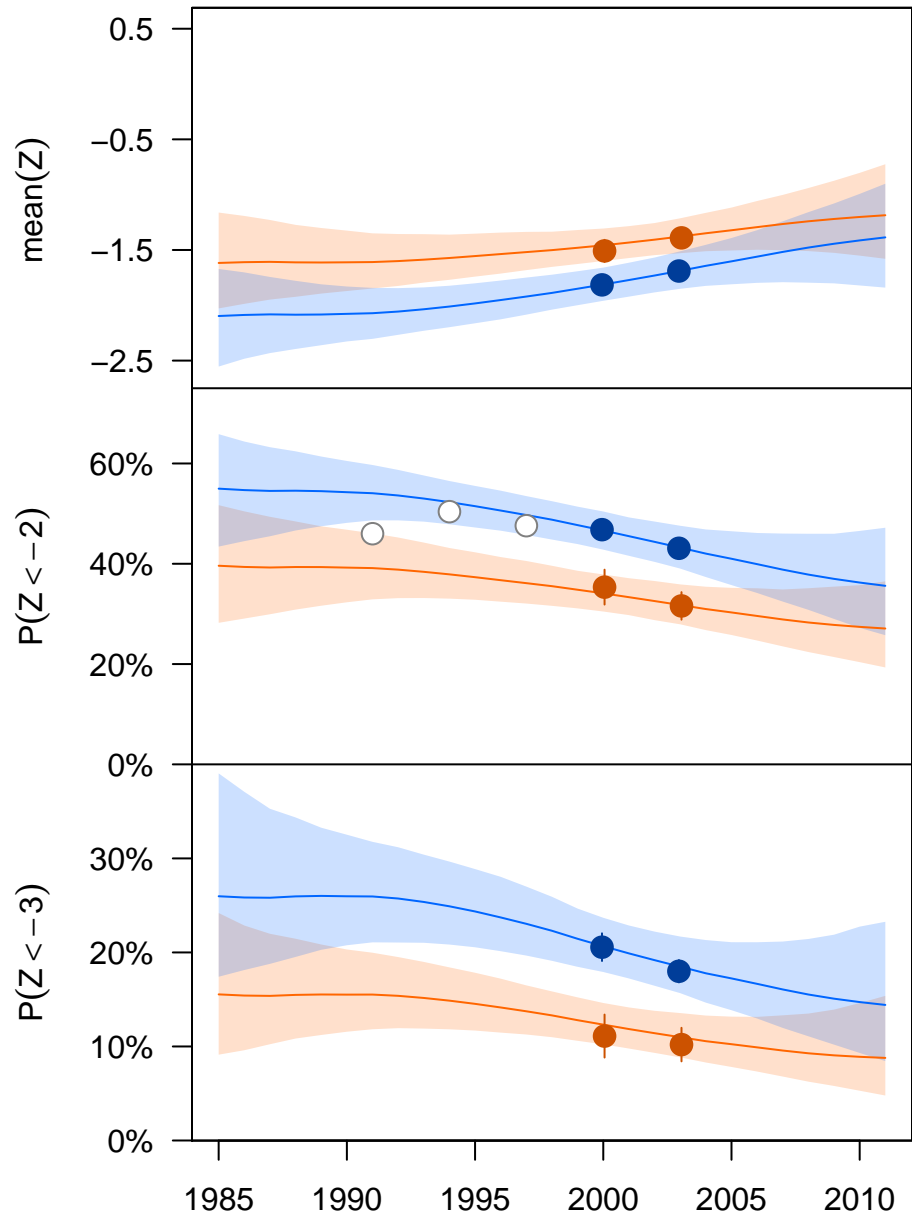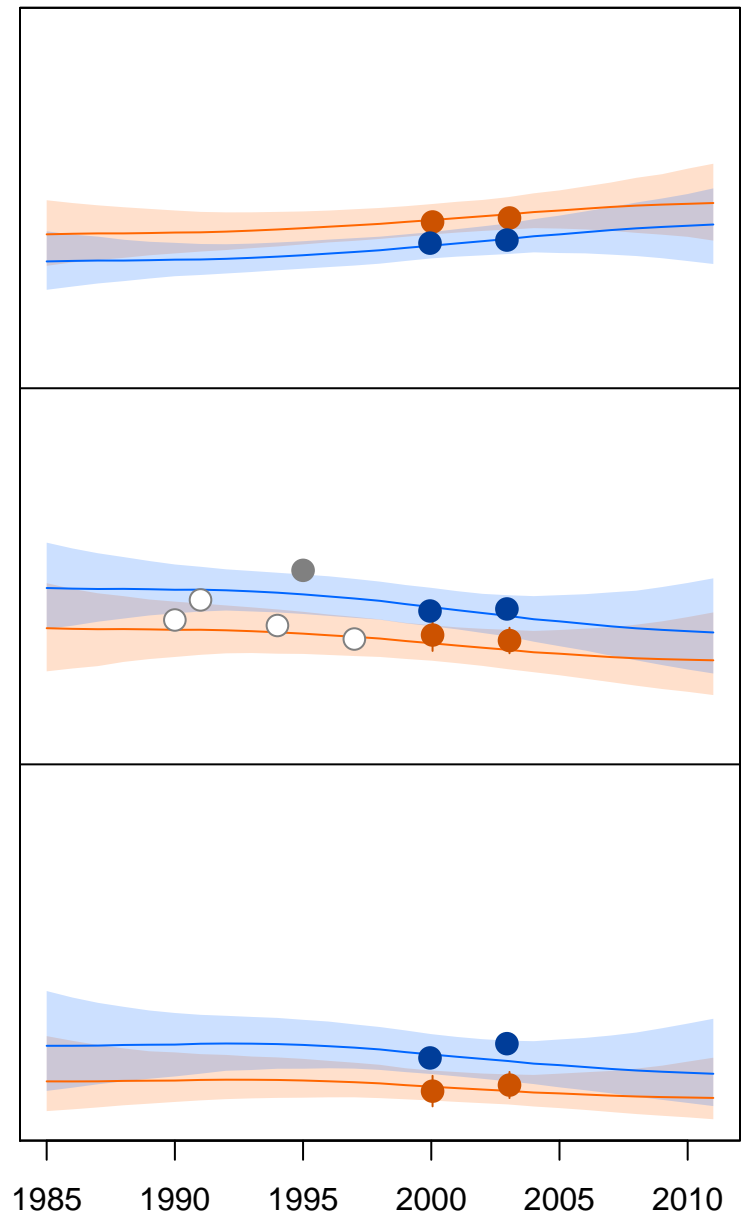



# Namibia

## Sub-Saharan Africa Region

### HAZ

### WAZ

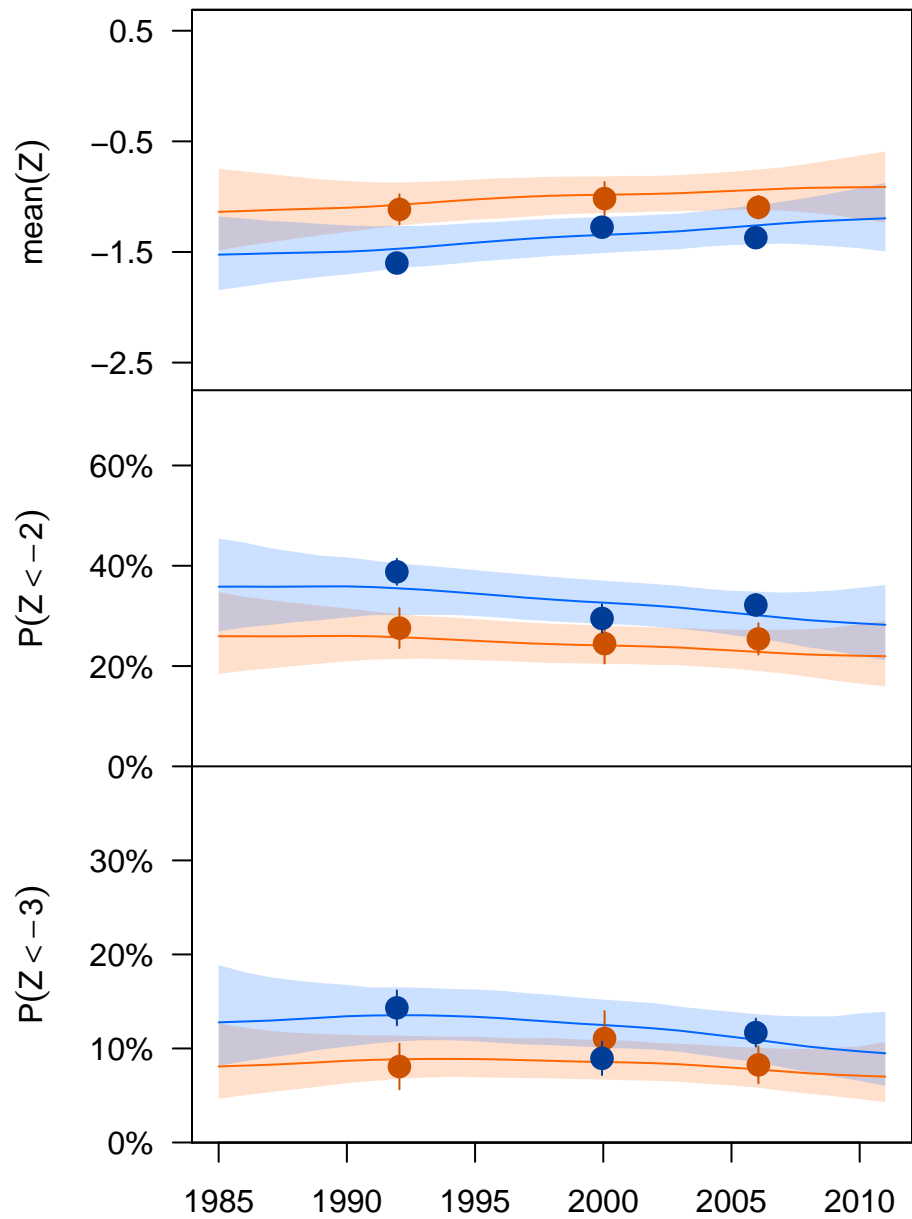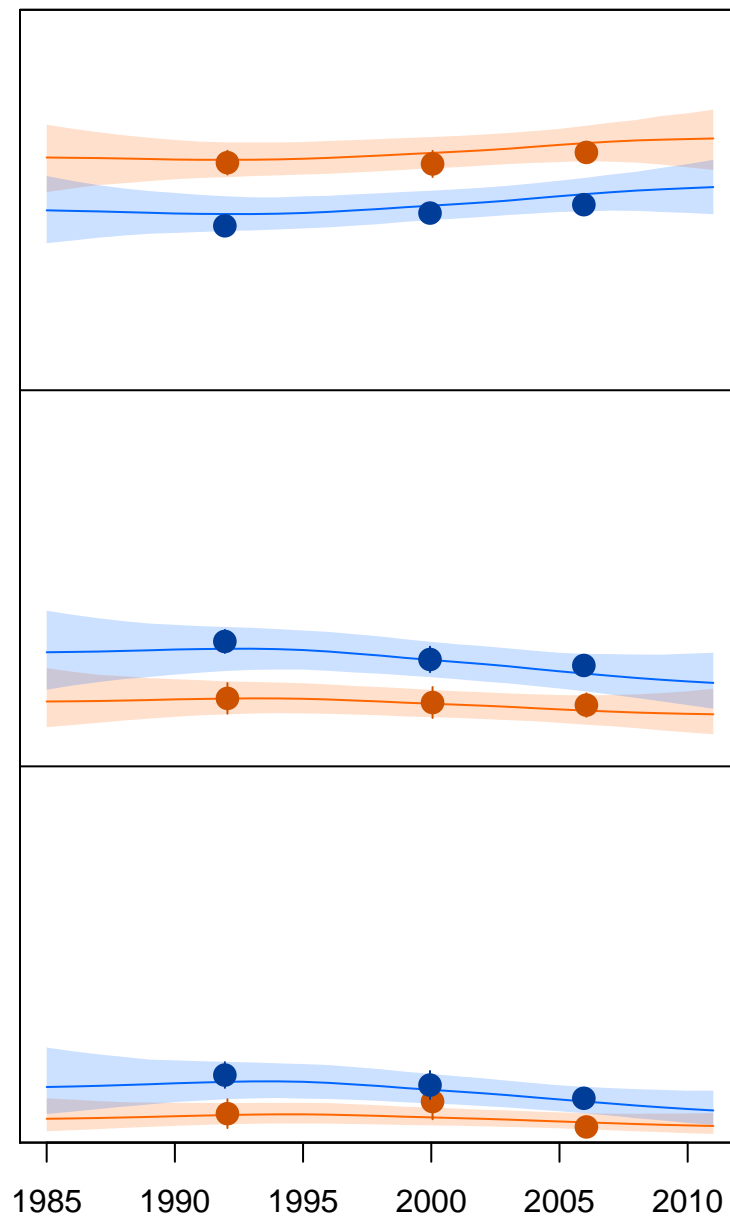

# Nepal

## South Asia Region

### HAZ

### WAZ

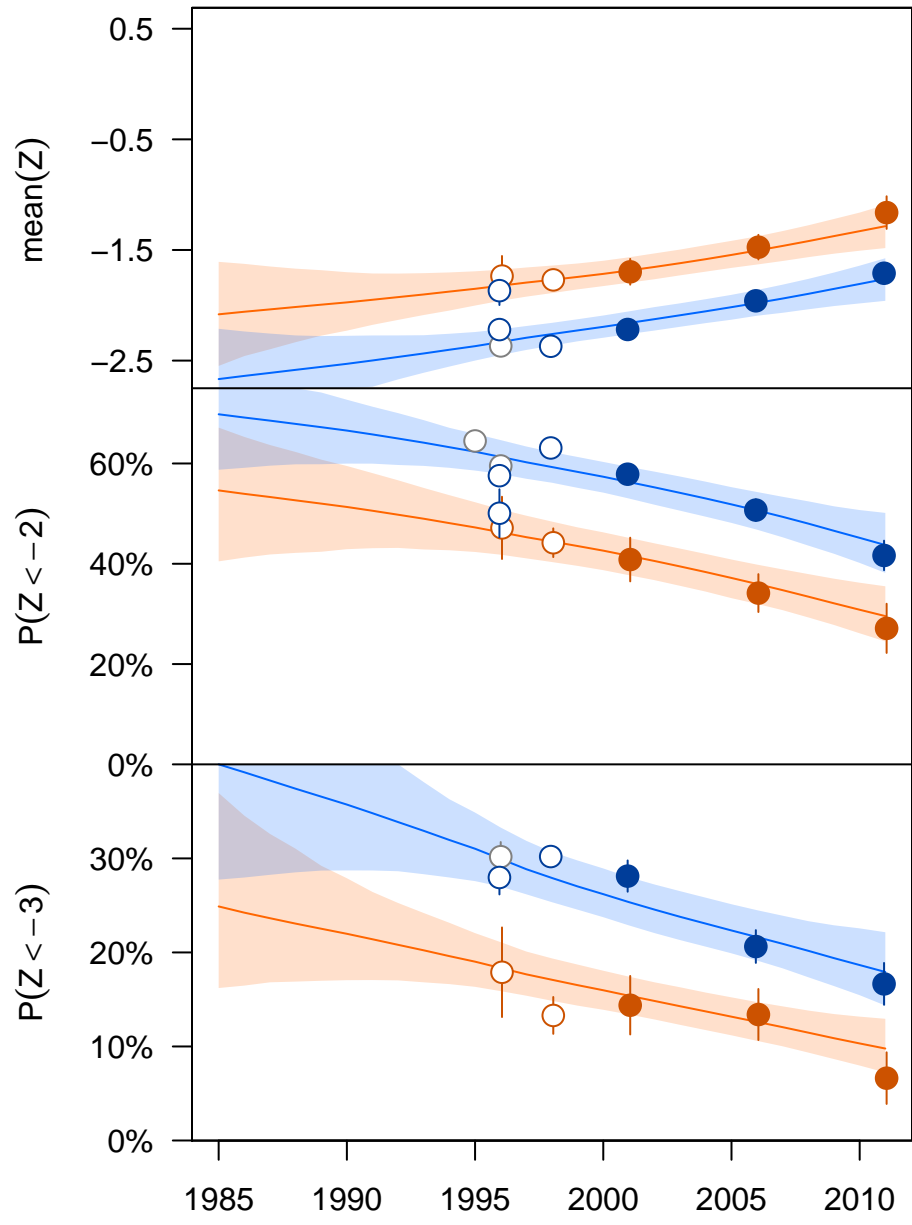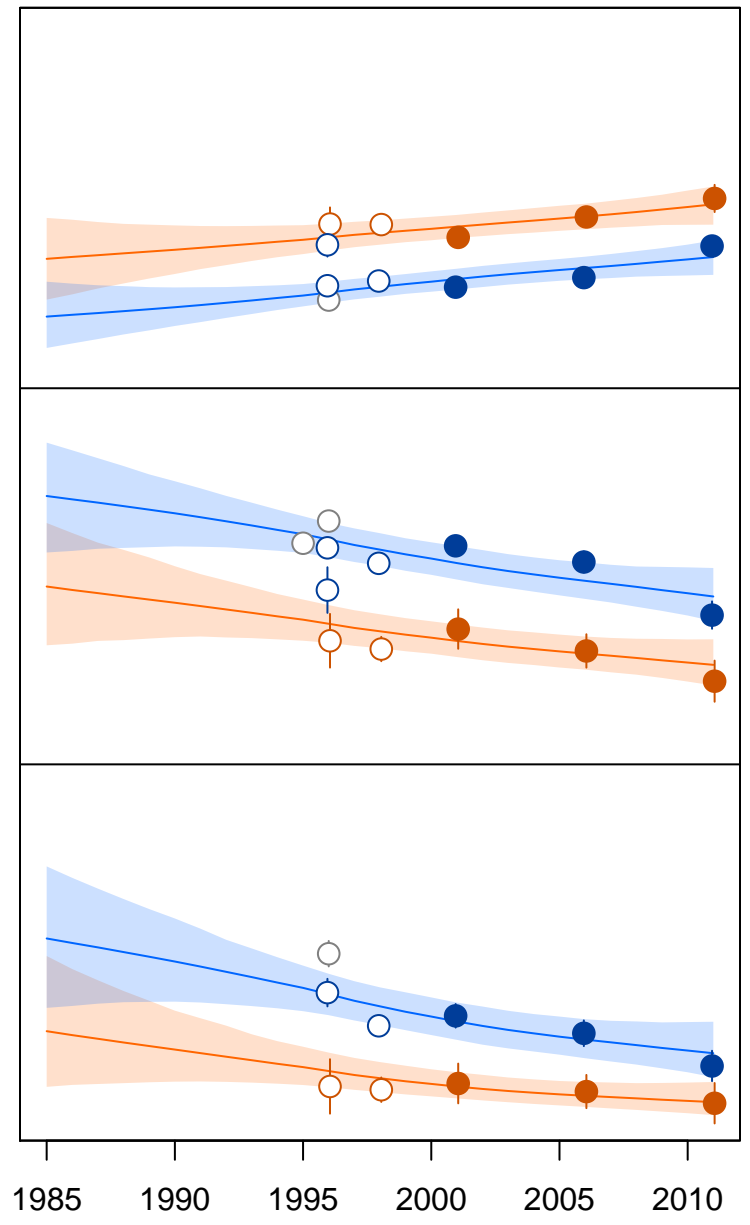

# Nicaragua

Andean and Central Latin America and Caribbean Region

138

## HAZ

## WAZ

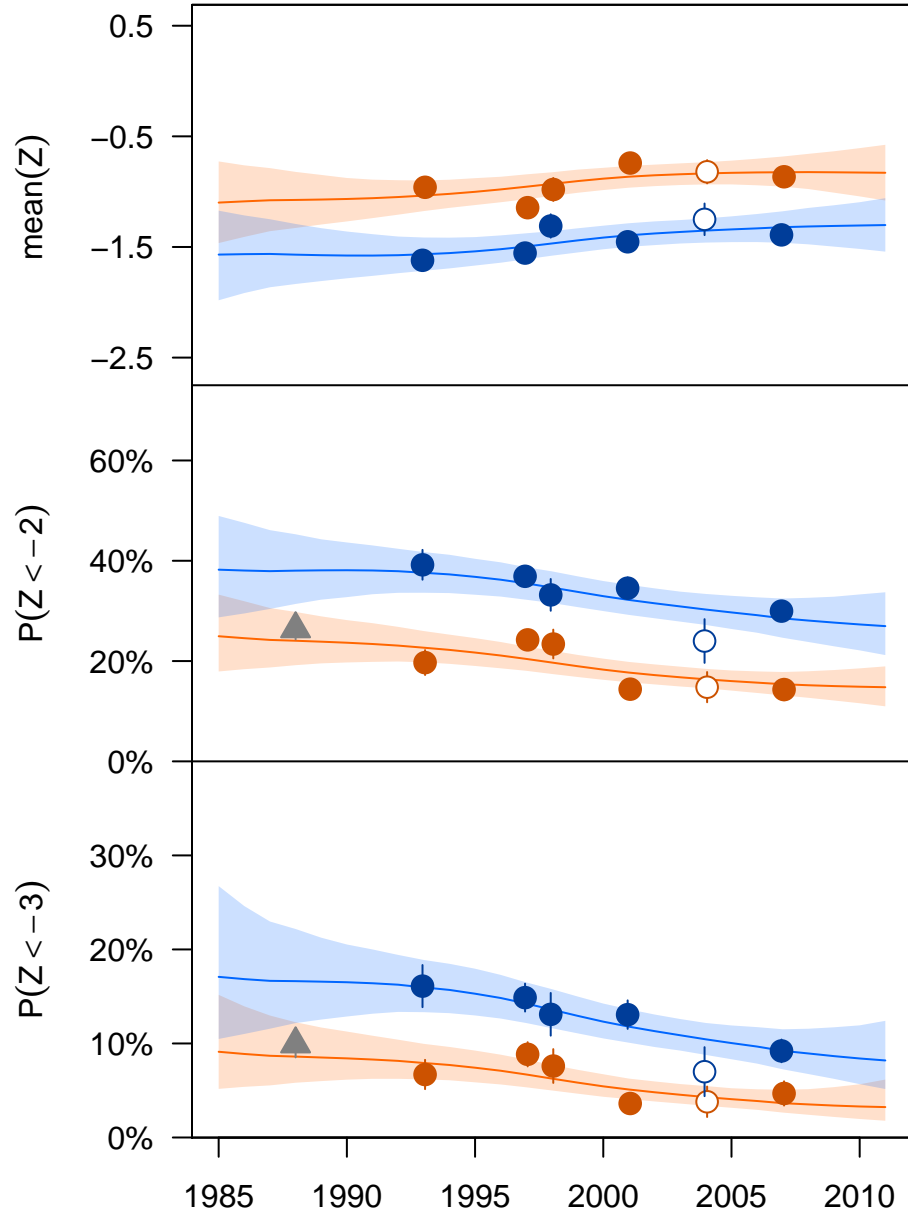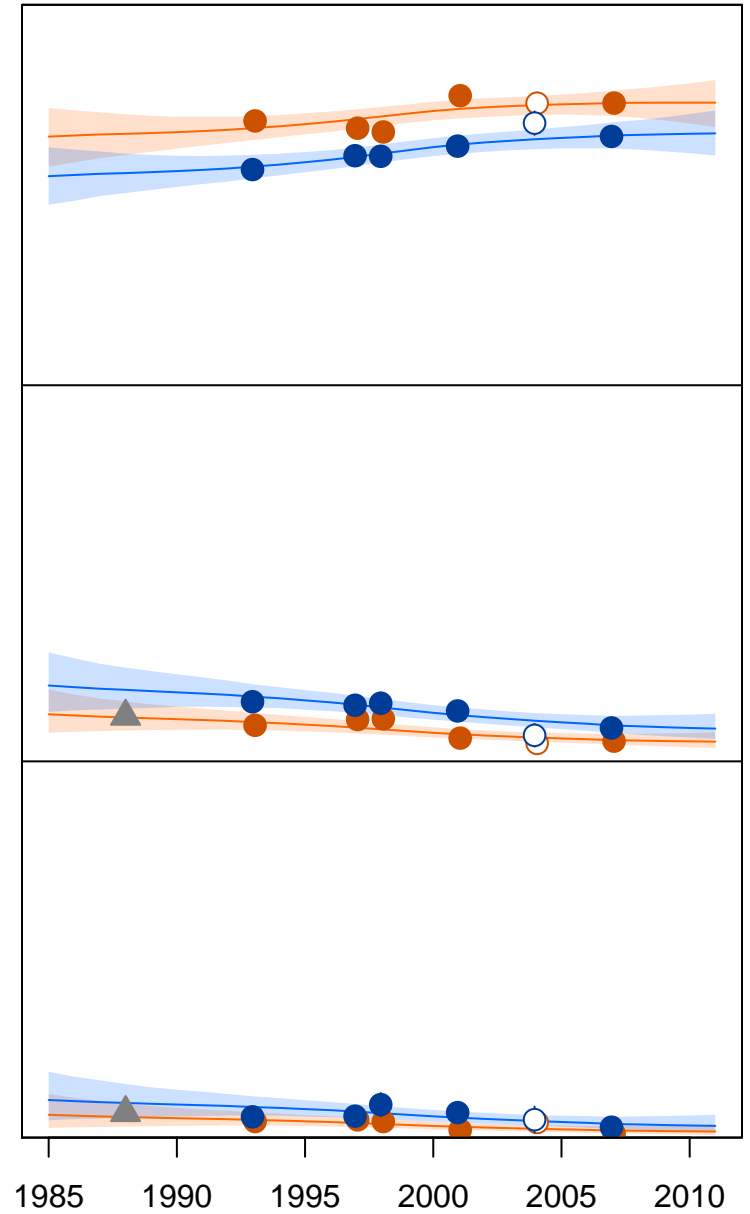

# Niger

## Sub-Saharan Africa Region

**HAZ**

**WAZ**

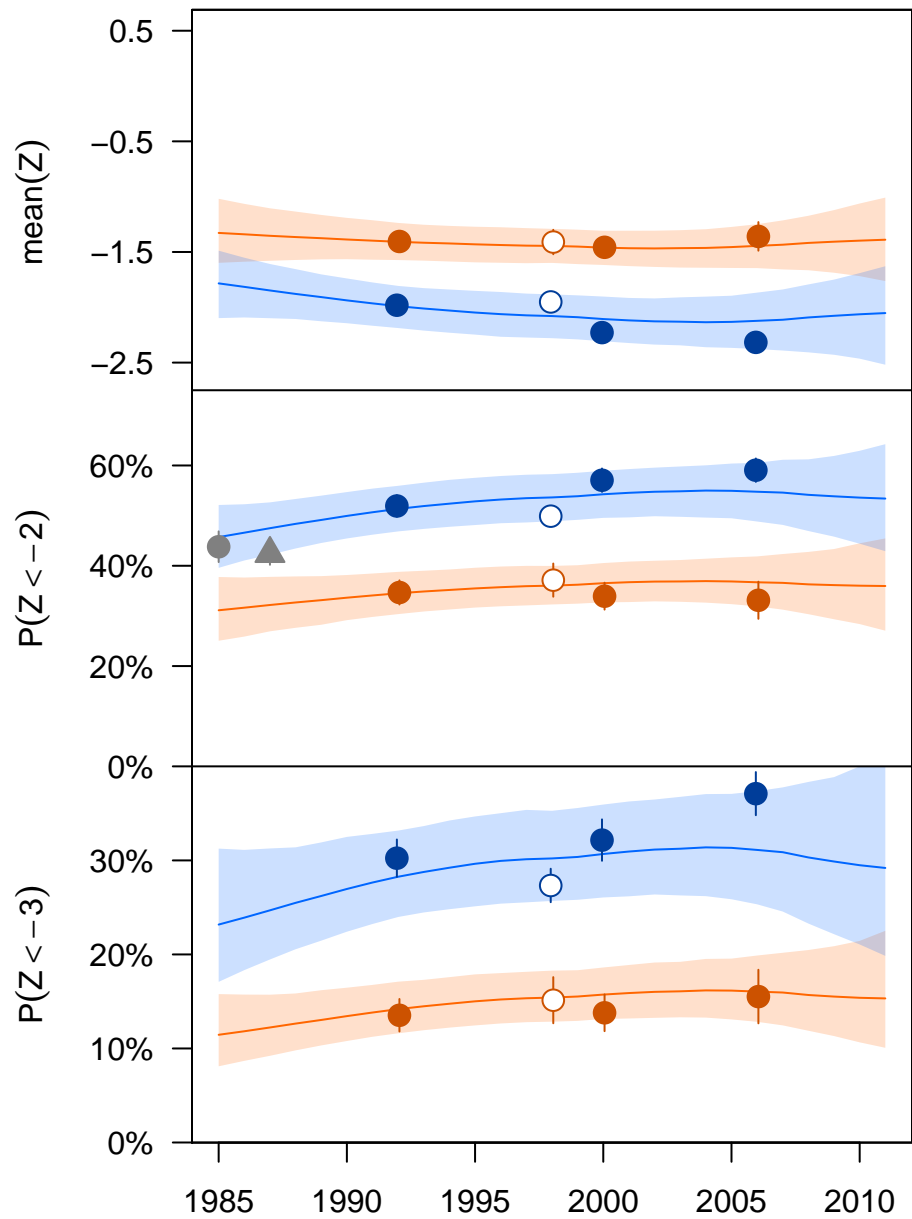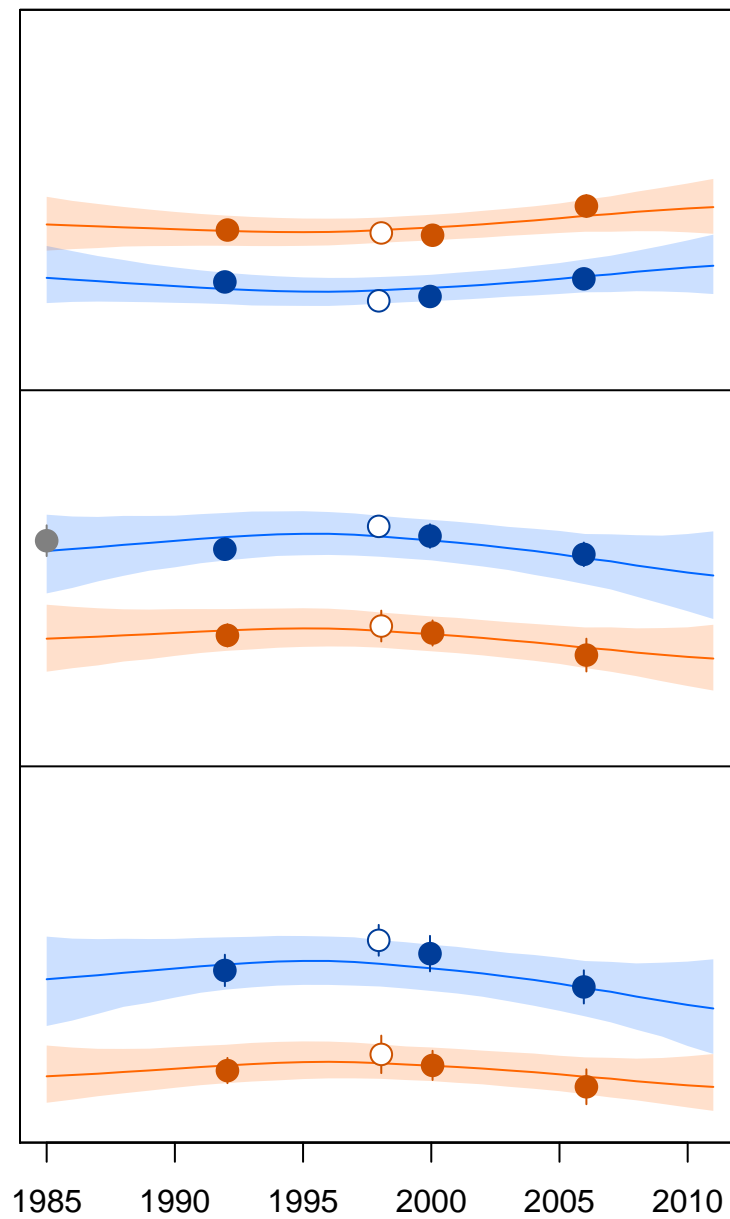

# Nigeria

## Sub-Saharan Africa Region

140

### HAZ

### WAZ

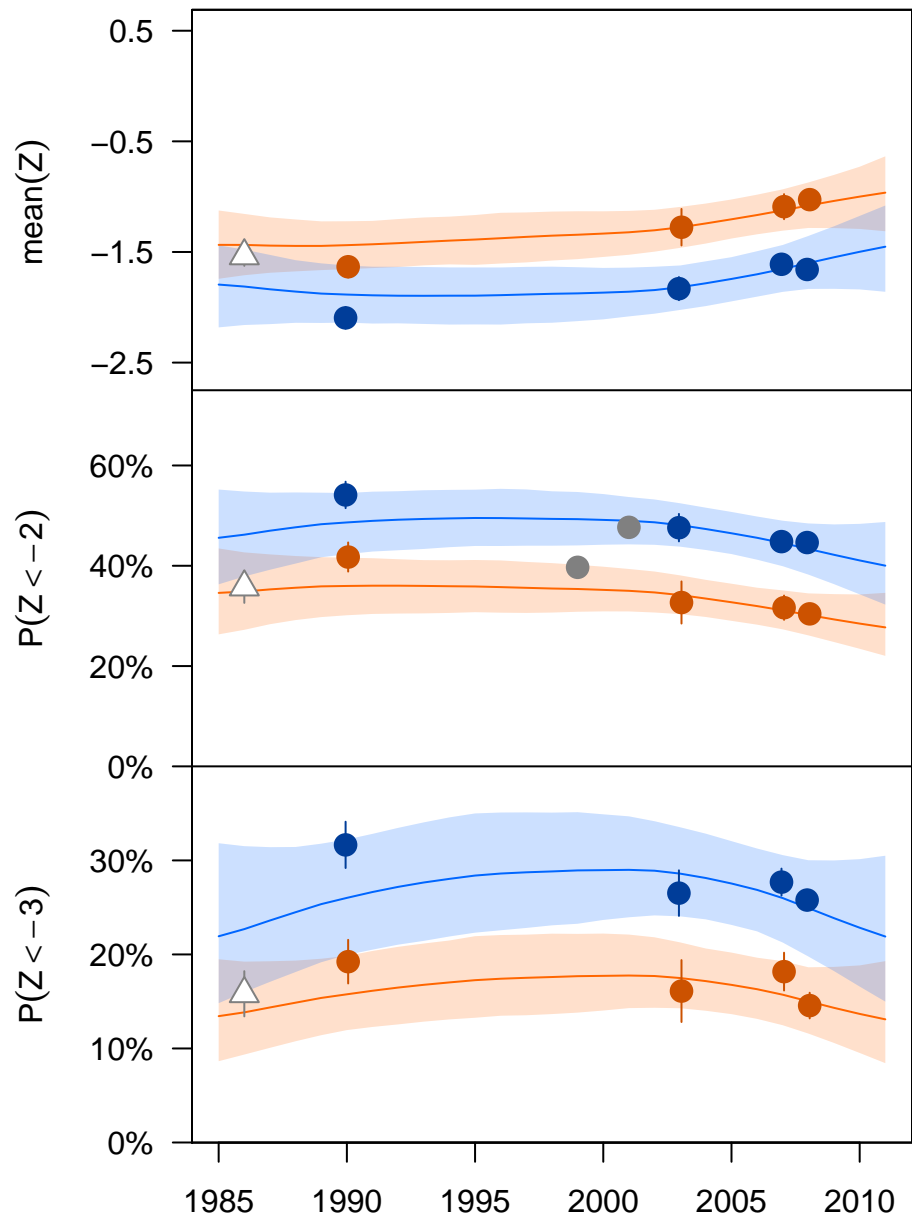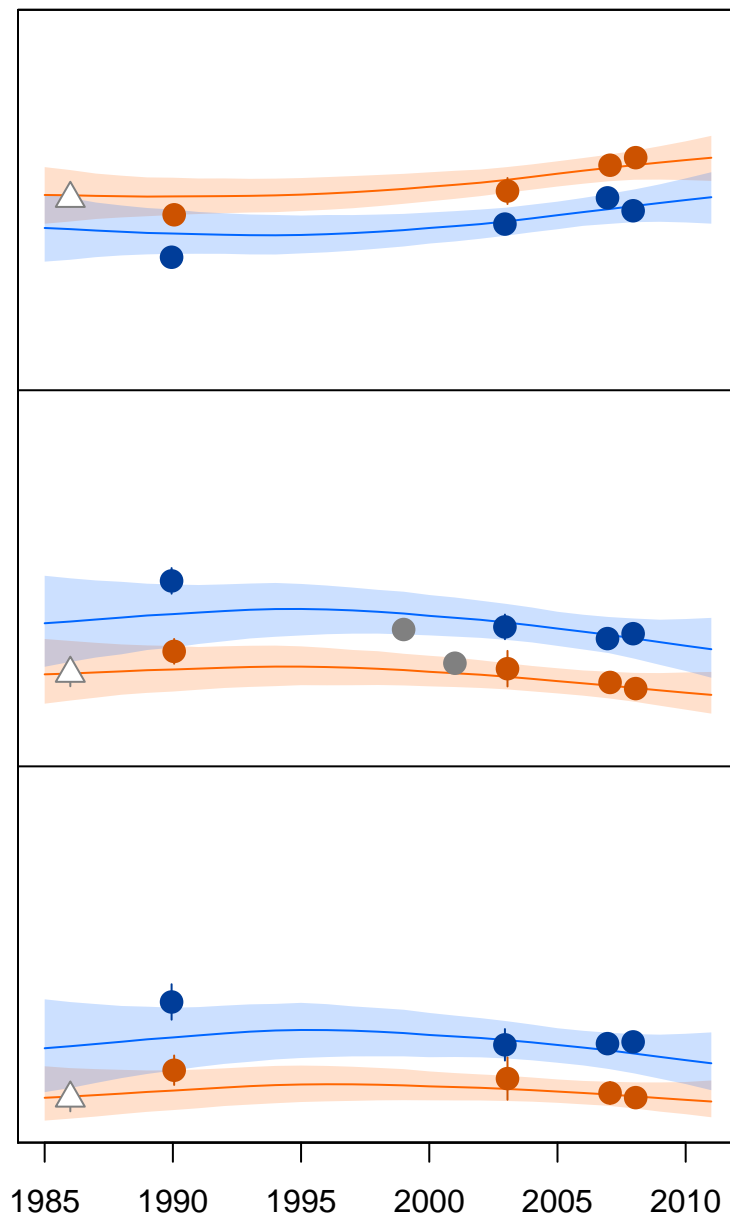

# Occupied Palestinian Territory

Central Asia, Middle East, and North Africa Region

141

## HAZ

## WAZ

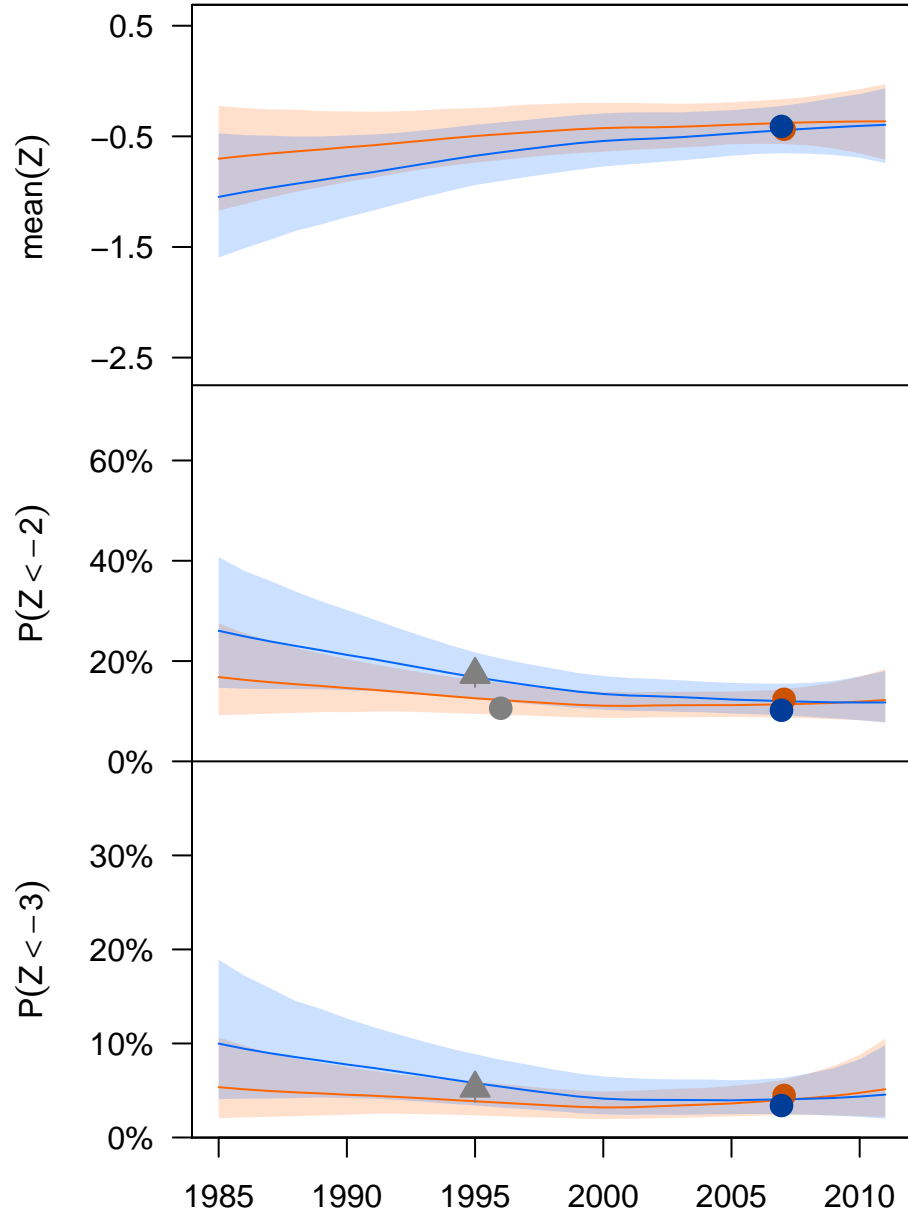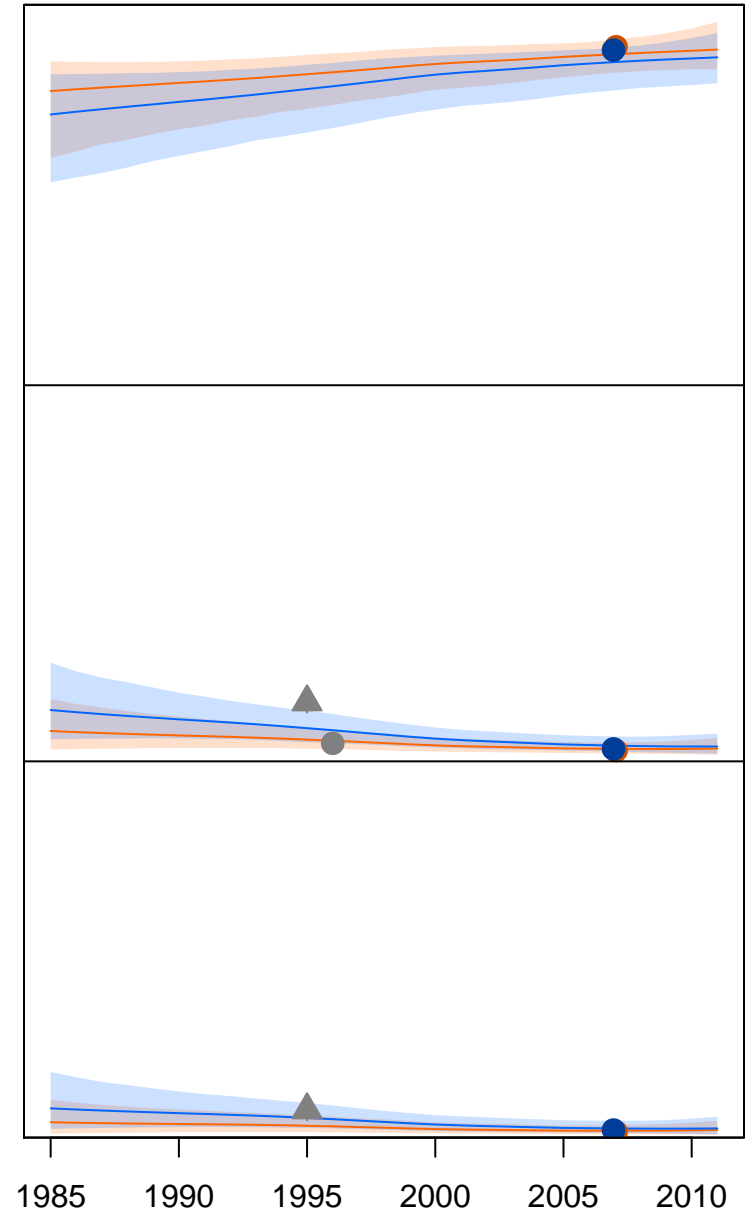

# Oman

## Central Asia, Middle East, and North Africa Region

142

### HAZ

### WAZ

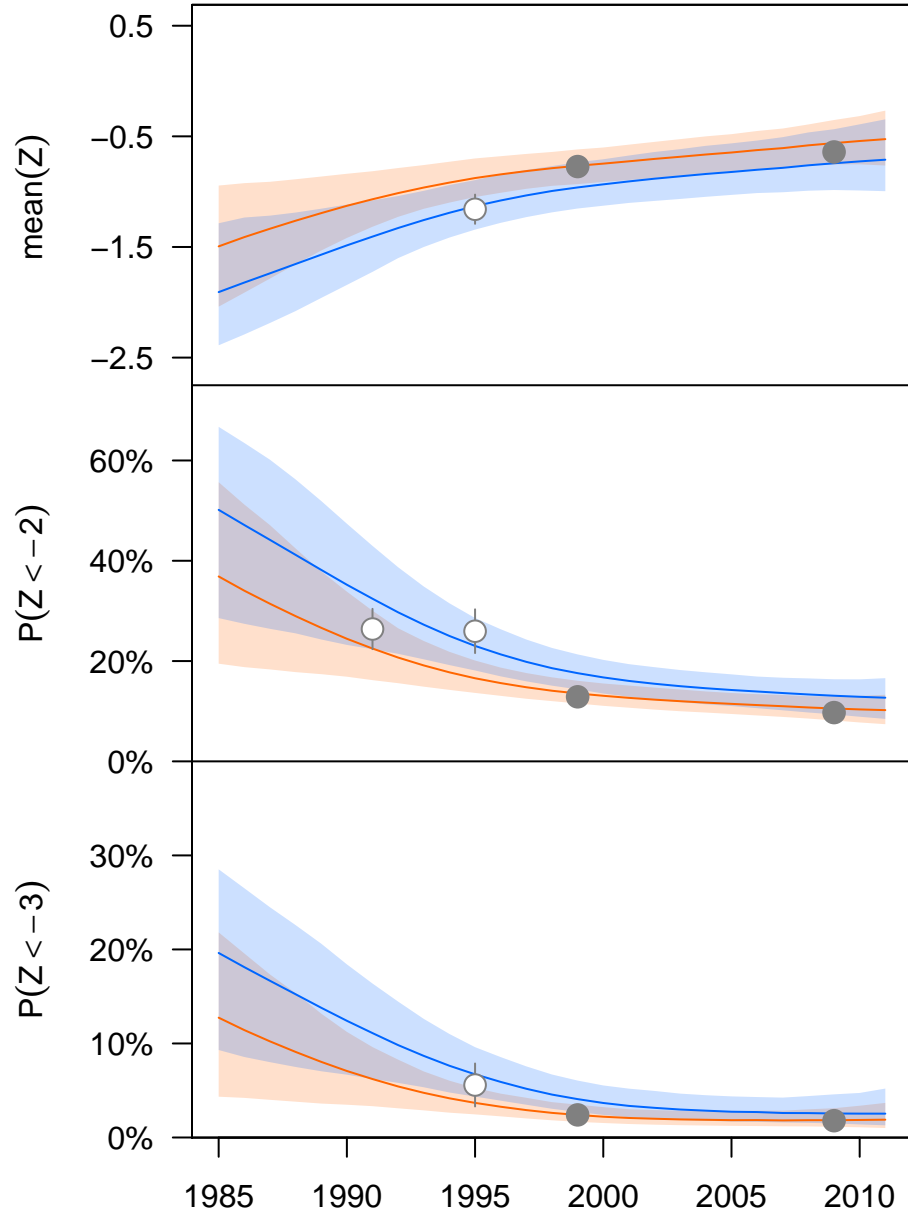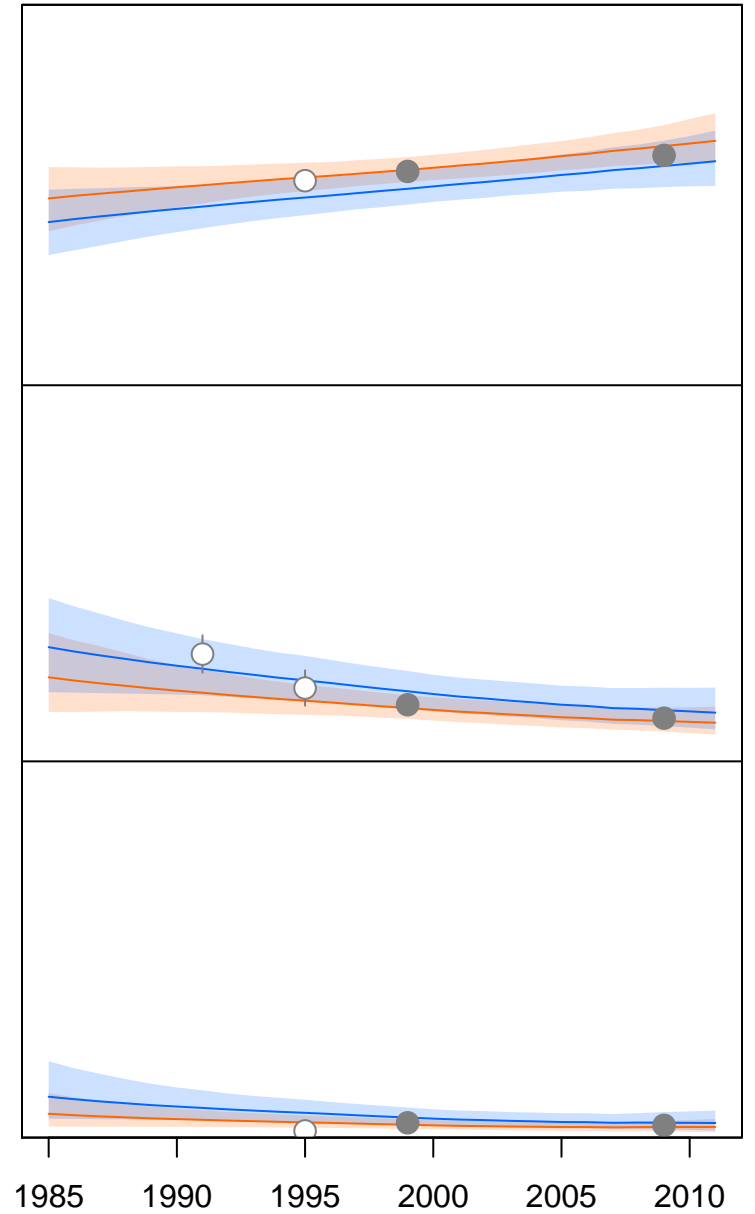

# Pakistan South Asia Region

## HAZ

## WAZ

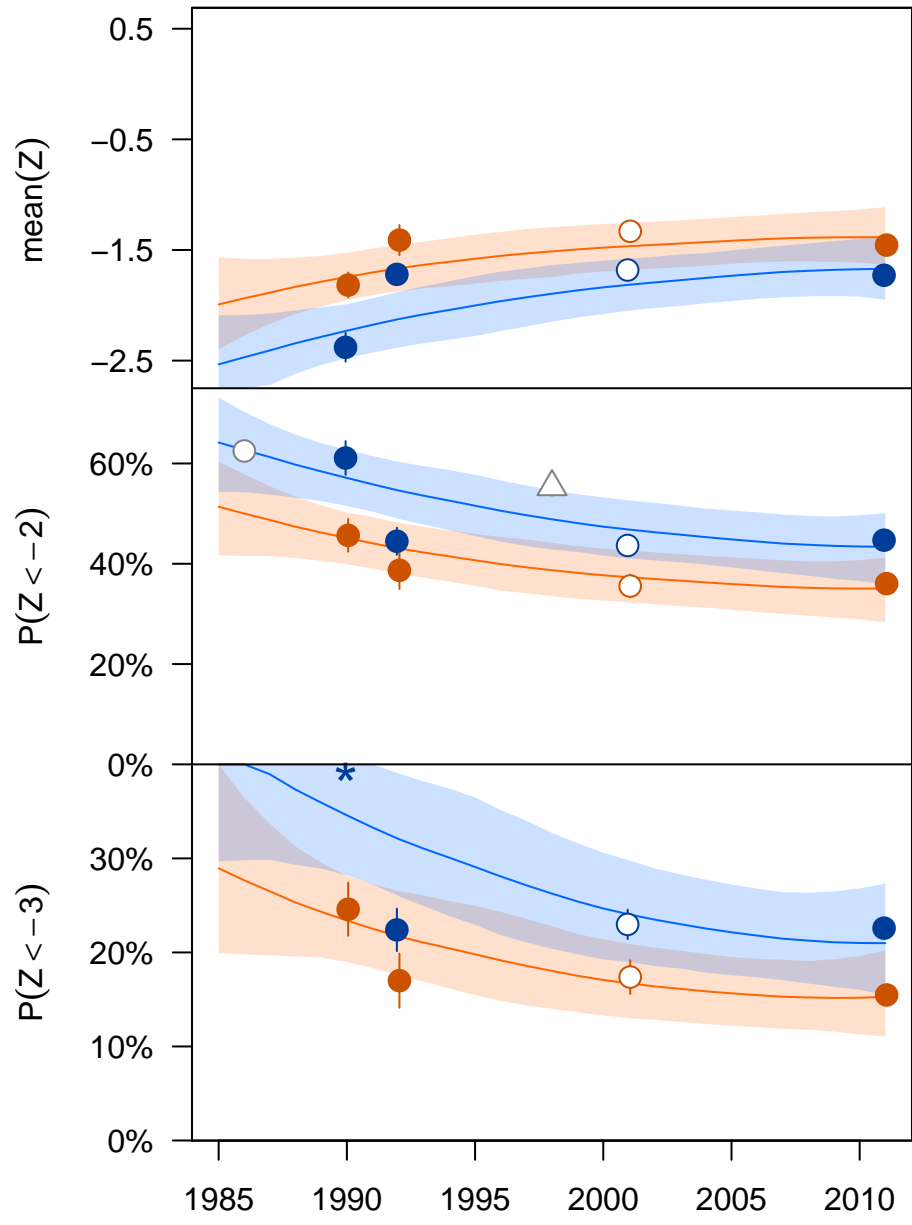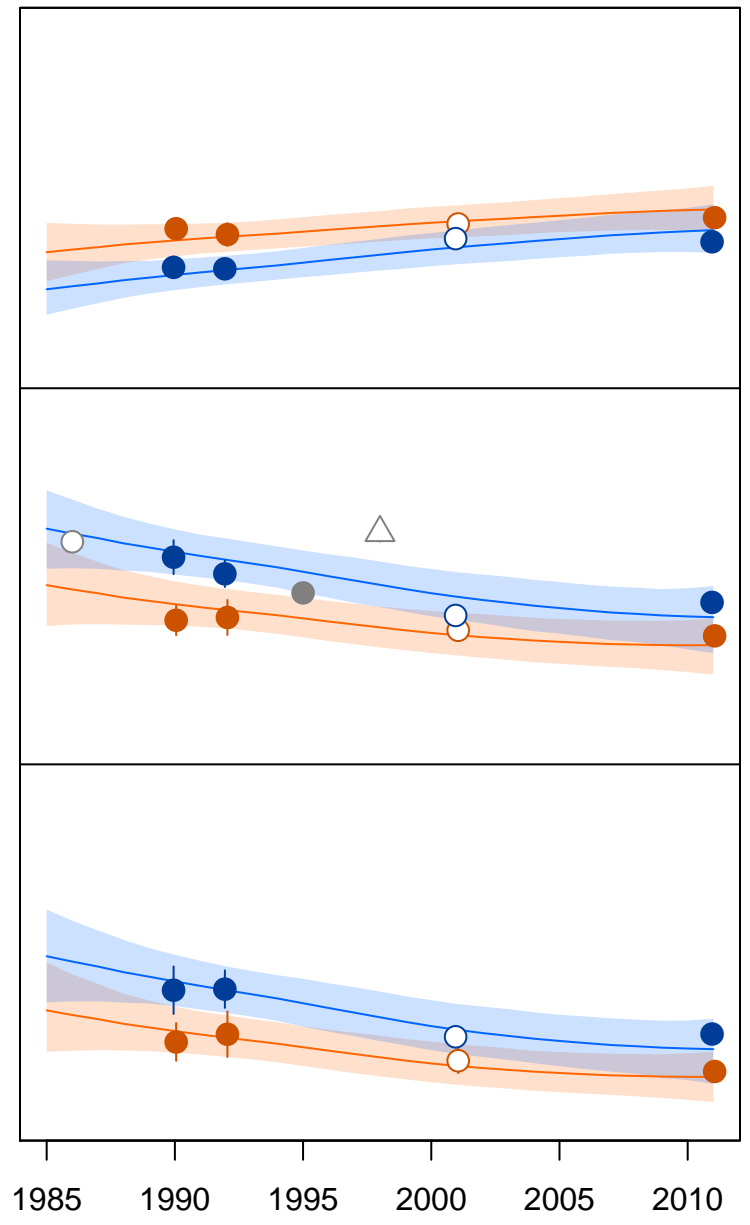



# Panama

Andean and Central Latin America and Caribbean Region

HAZ

WAZ

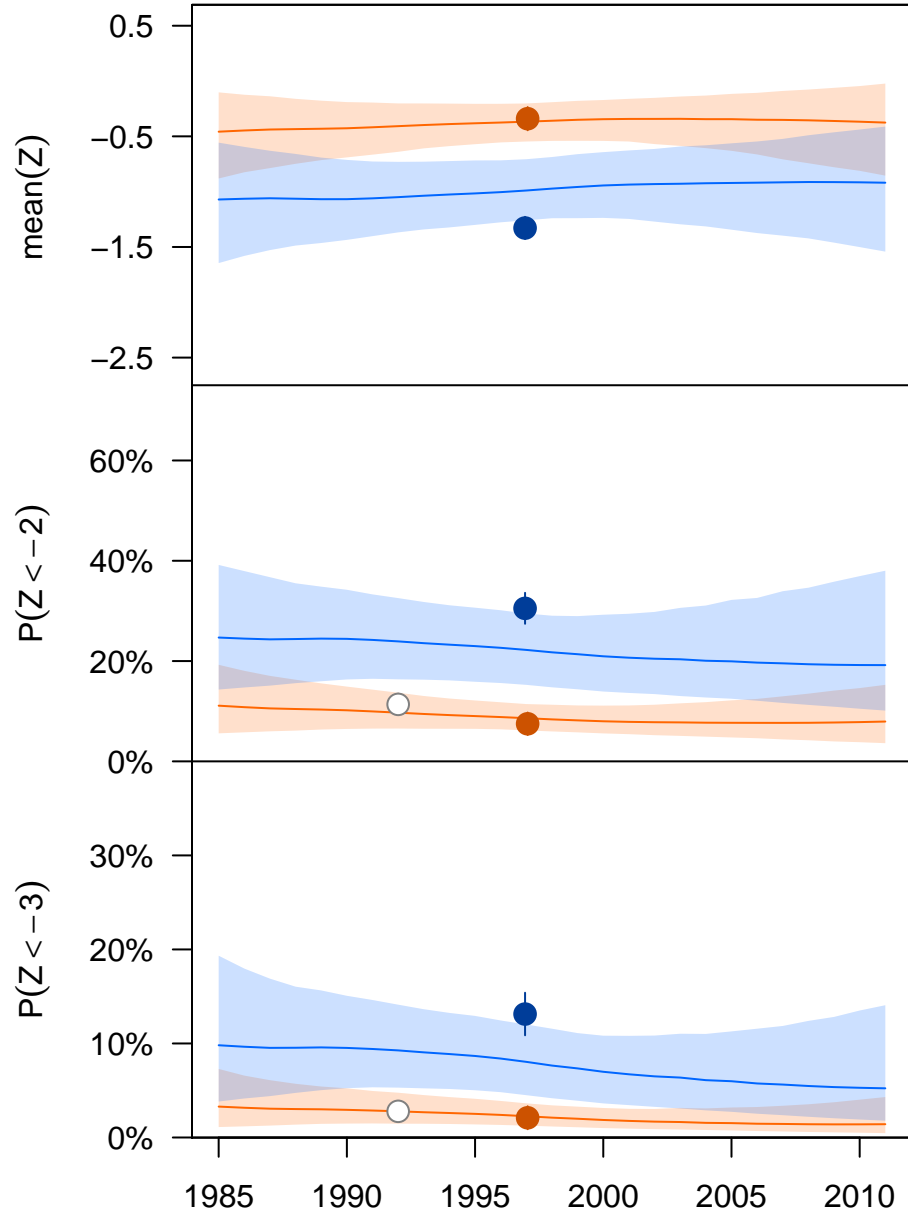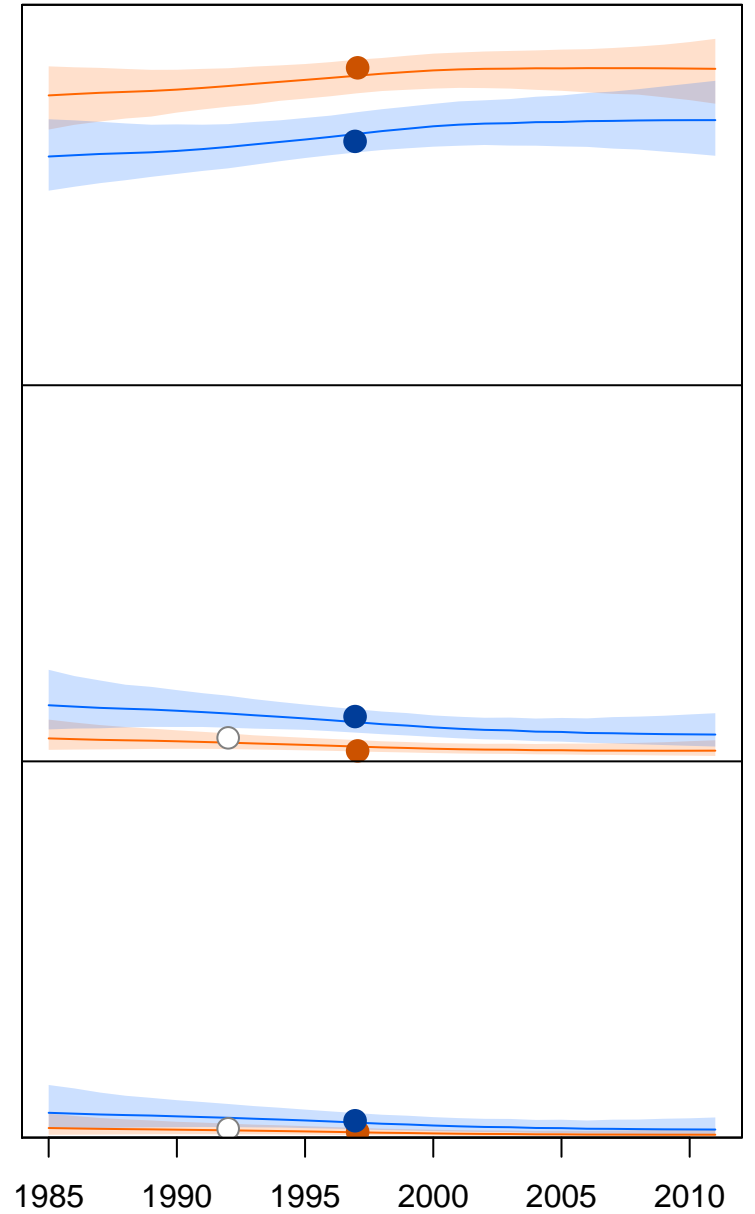

Papua New Guinea  
Oceania Region

145

HAZ

WAZ

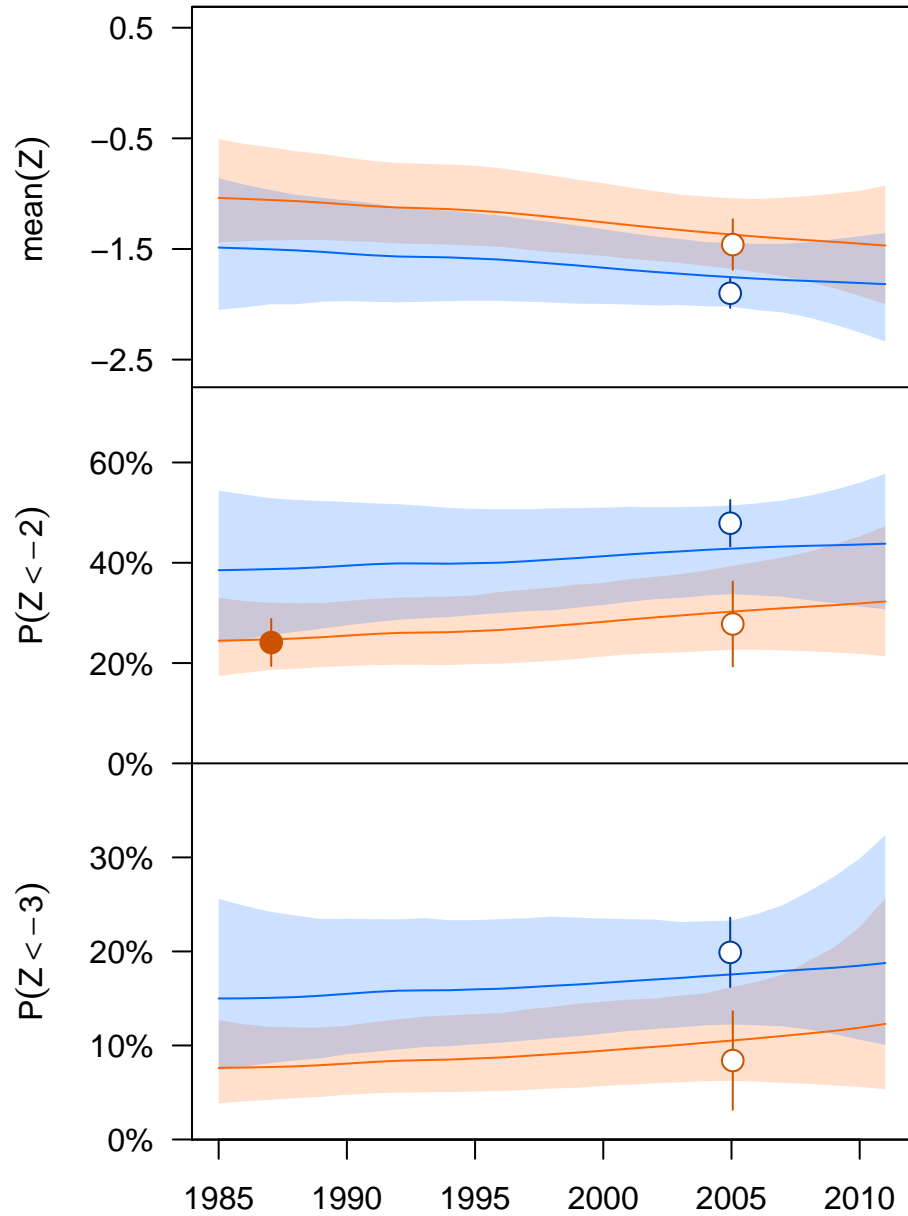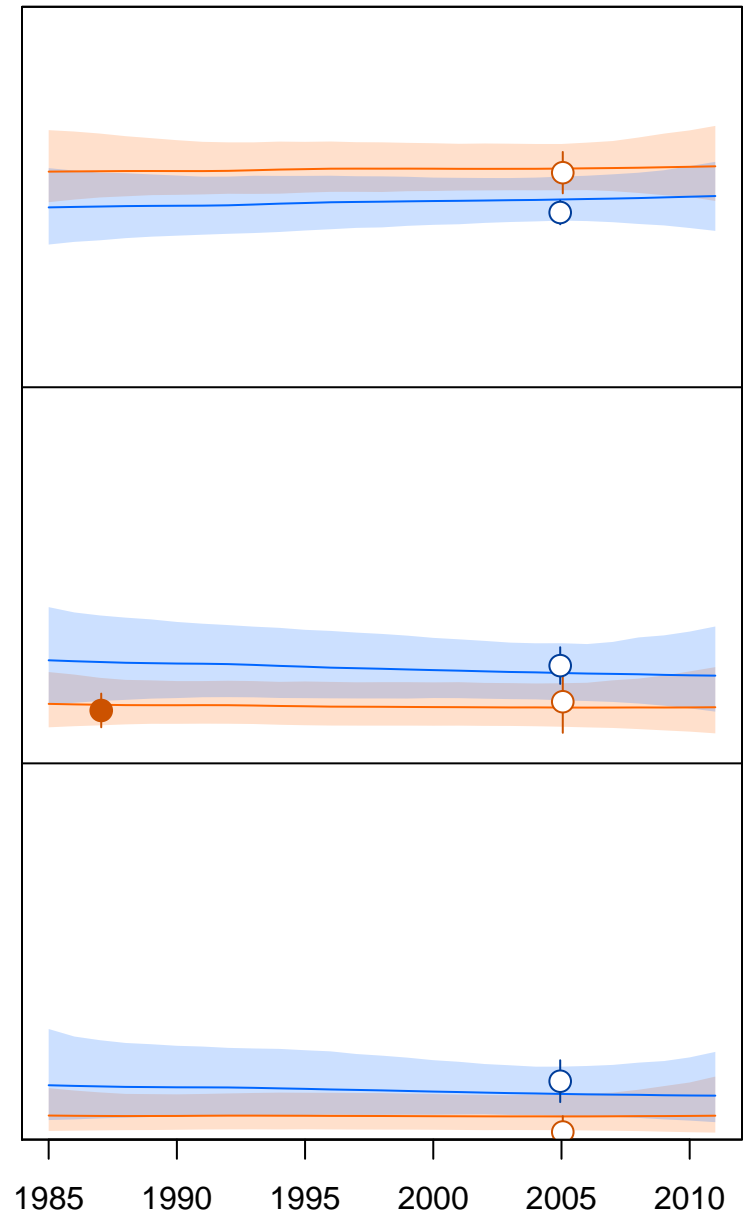

# Paraguay

## Southern and Tropical Latin America Region

### HAZ

### WAZ

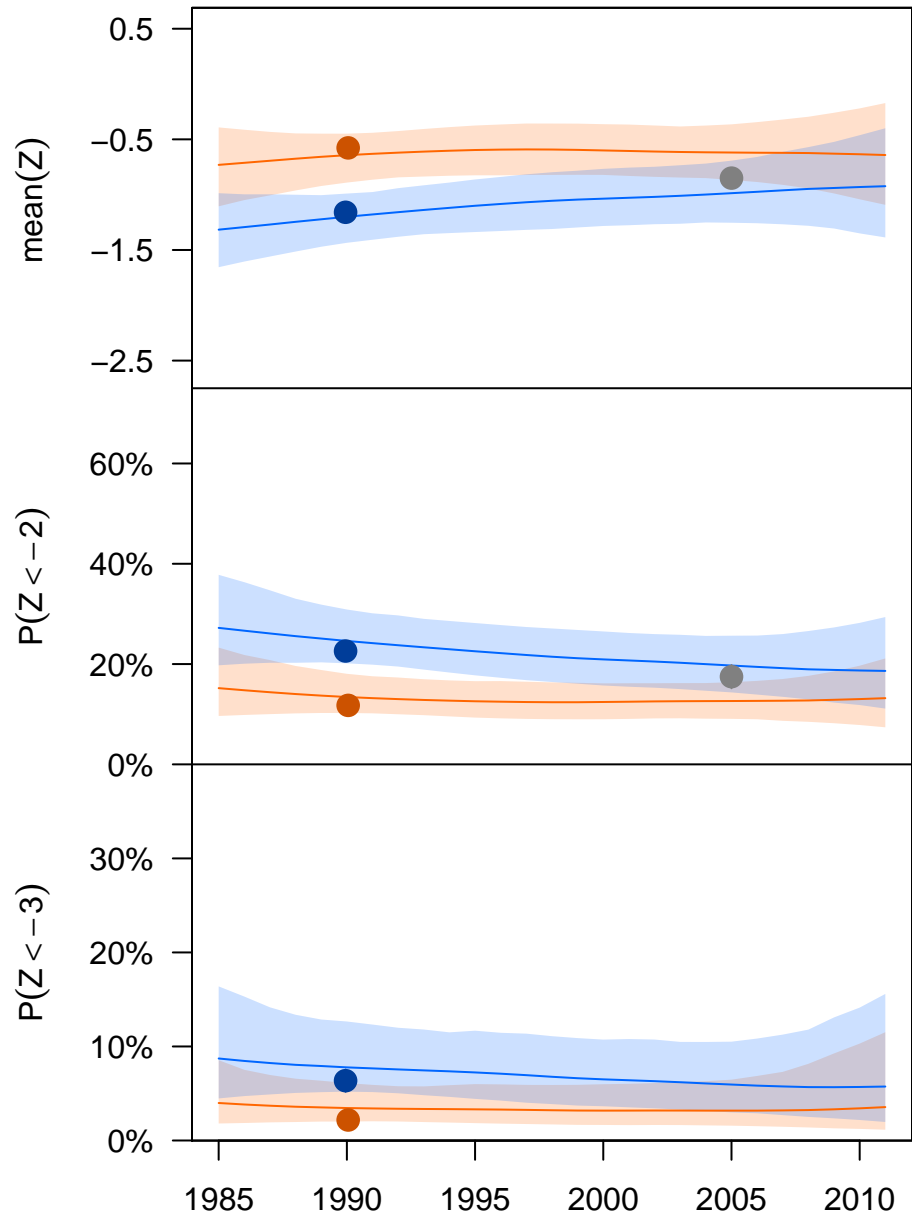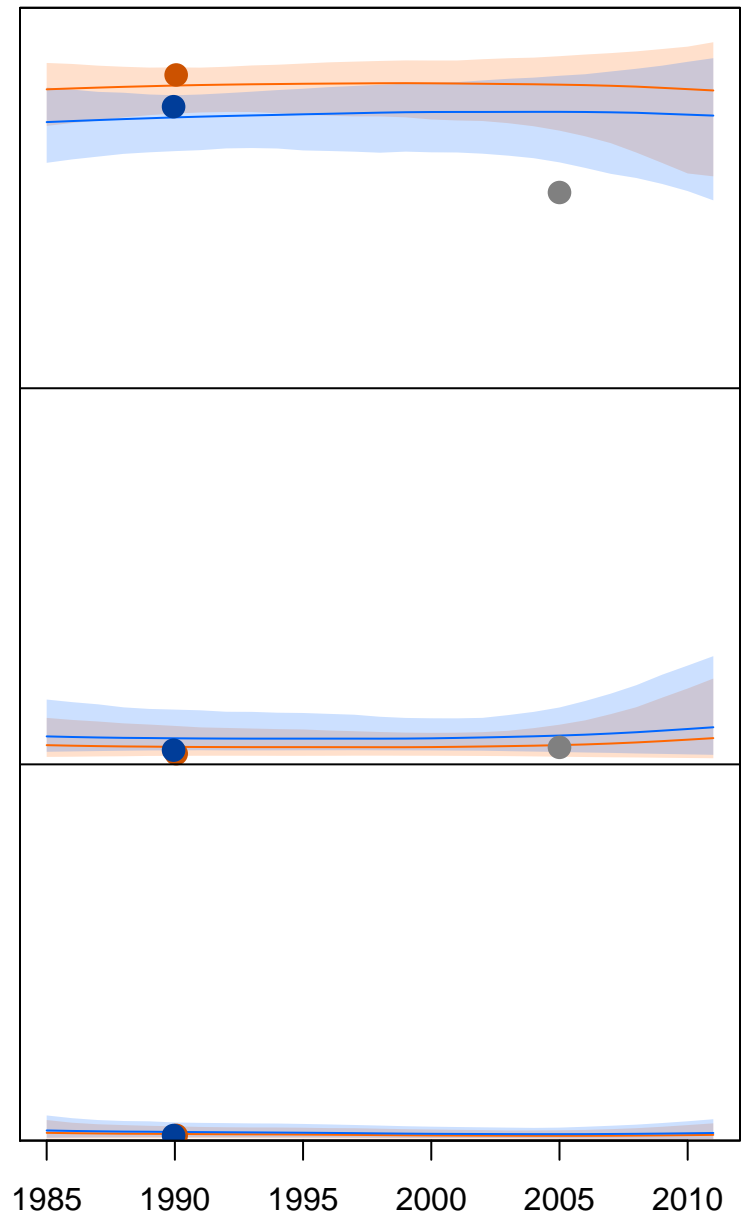

# Peru

## Andean and Central Latin America and Caribbean Region

147

### HAZ

### WAZ

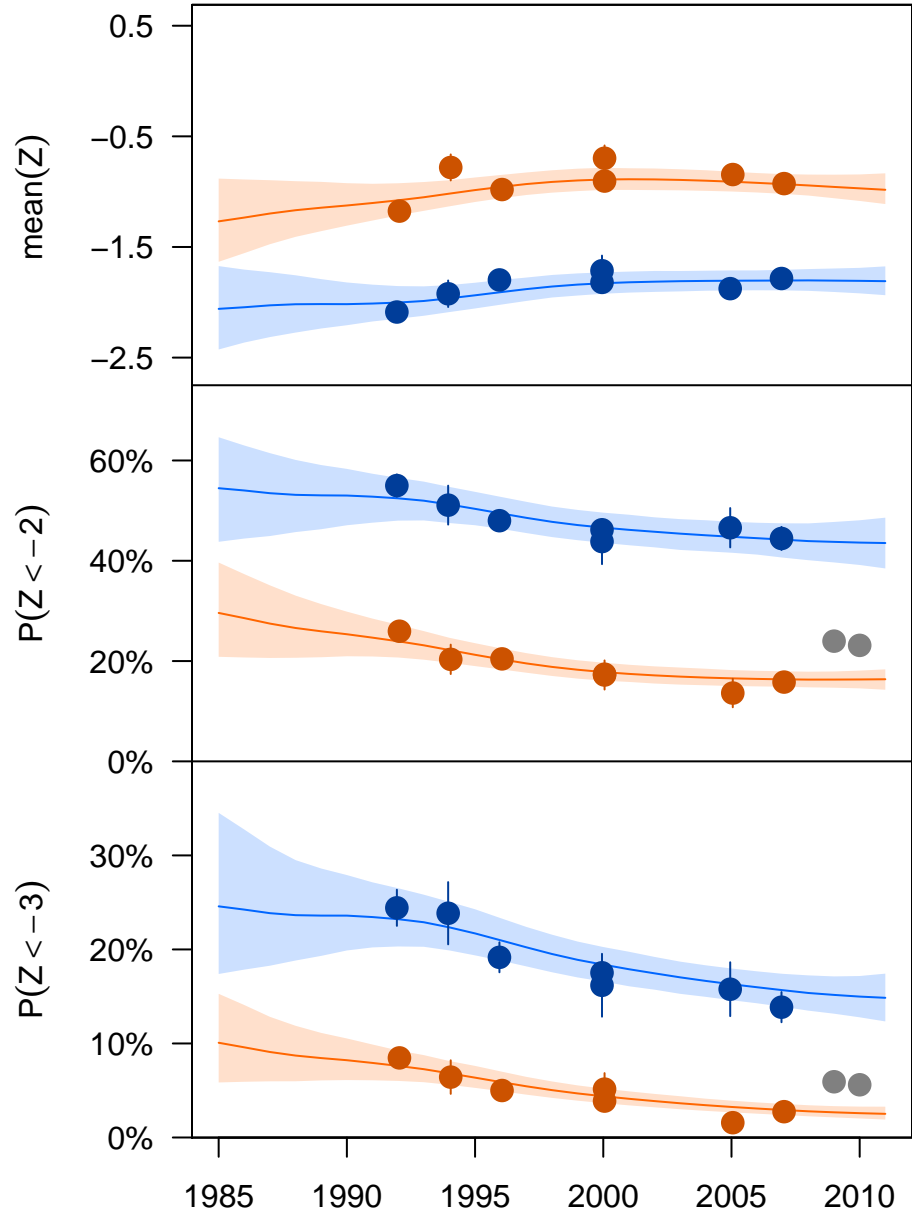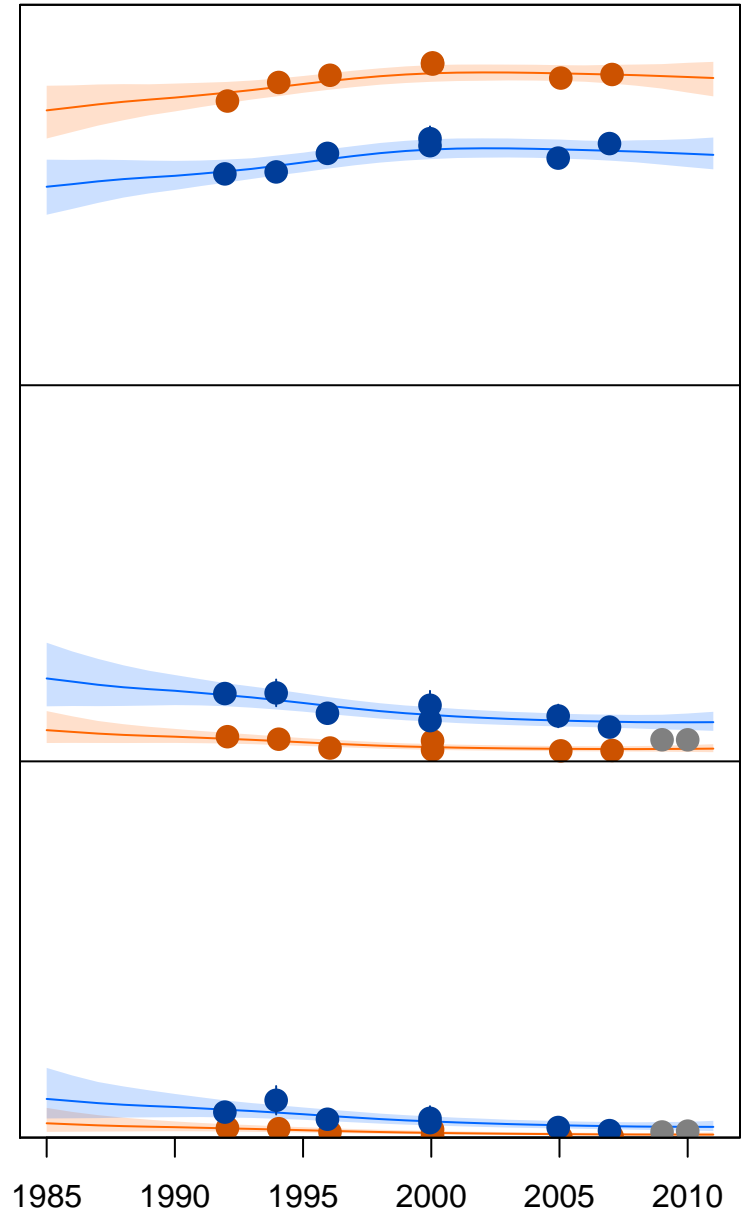

# Philippines

## East and Southeast Asia Region

### HAZ

### WAZ

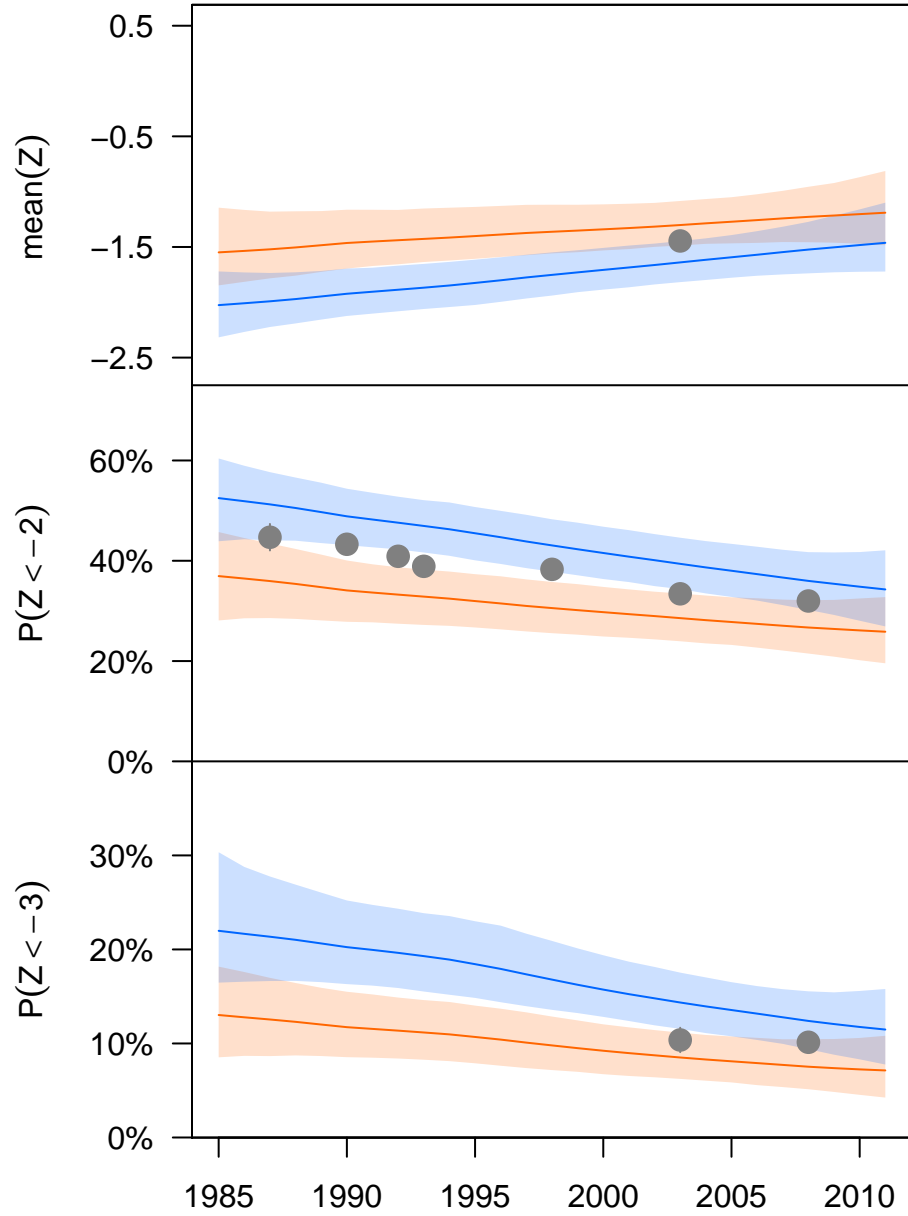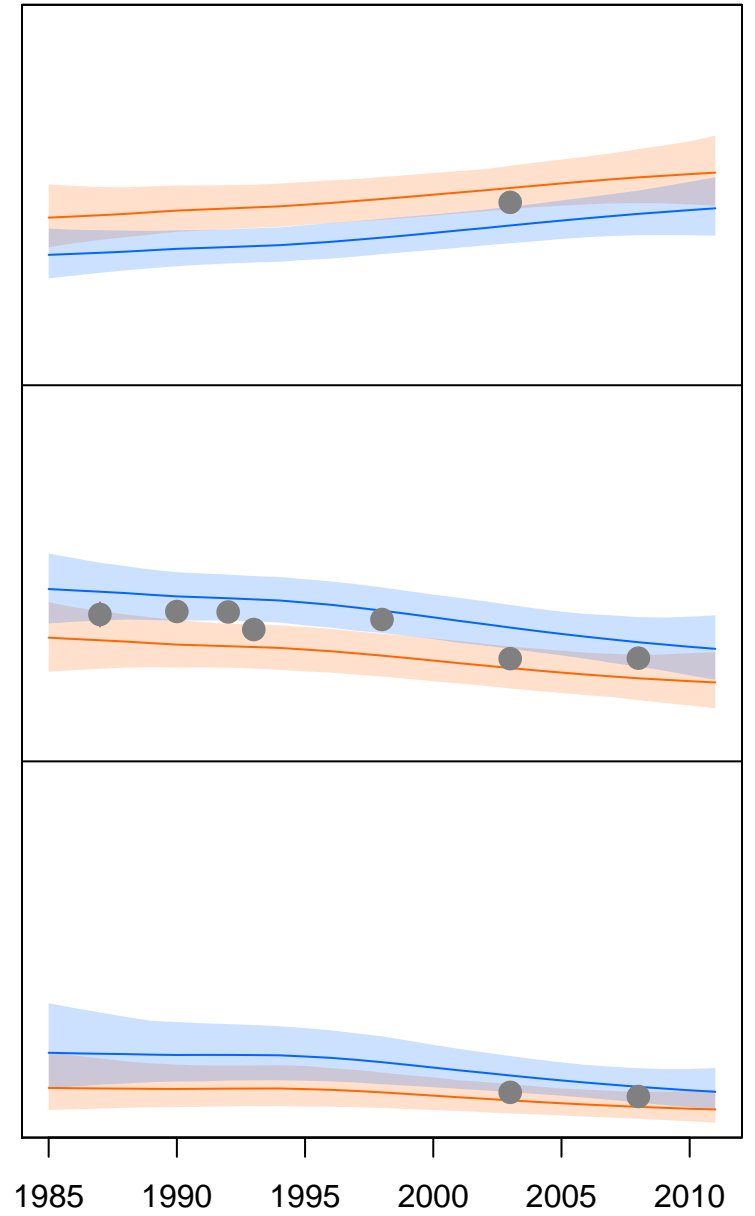

# Puerto Rico

Andean and Central Latin America and Caribbean Region

149

## HAZ

## WAZ

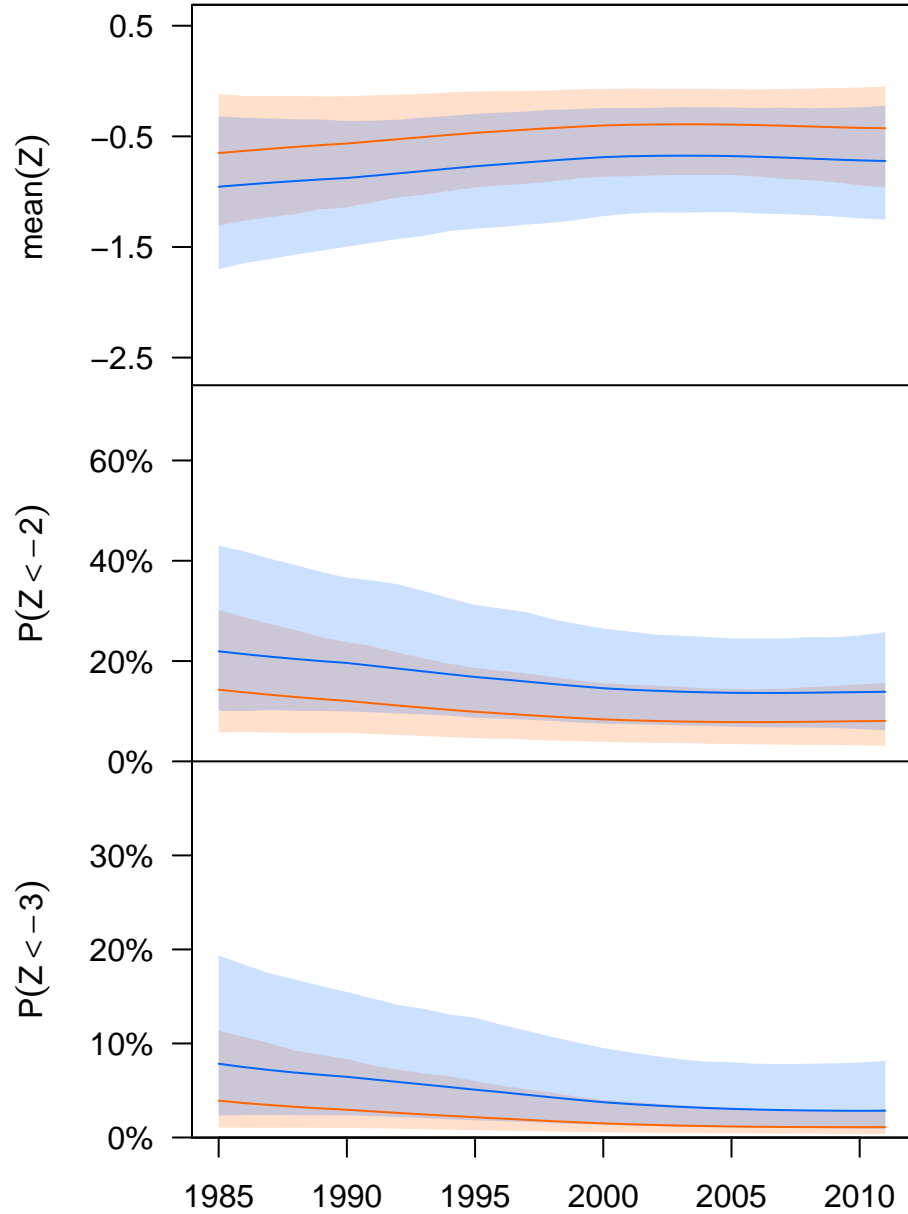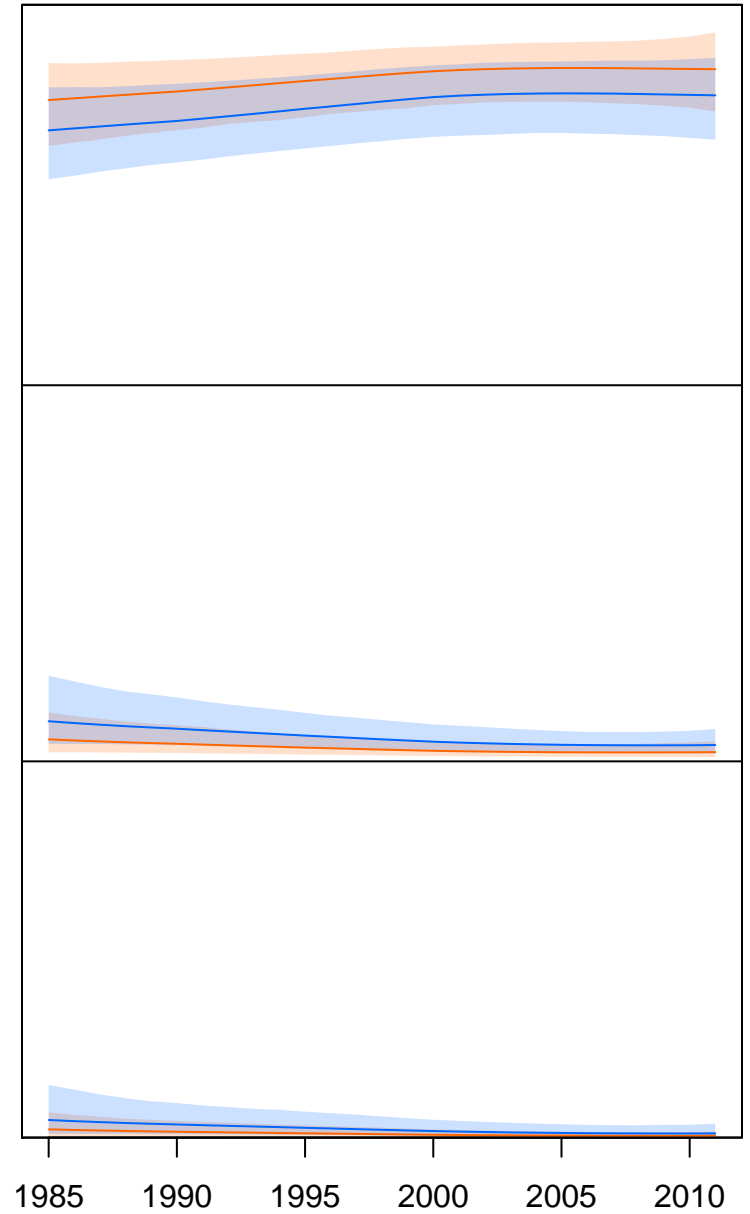

# Qatar

## Central Asia, Middle East, and North Africa Region

150

### HAZ

### WAZ

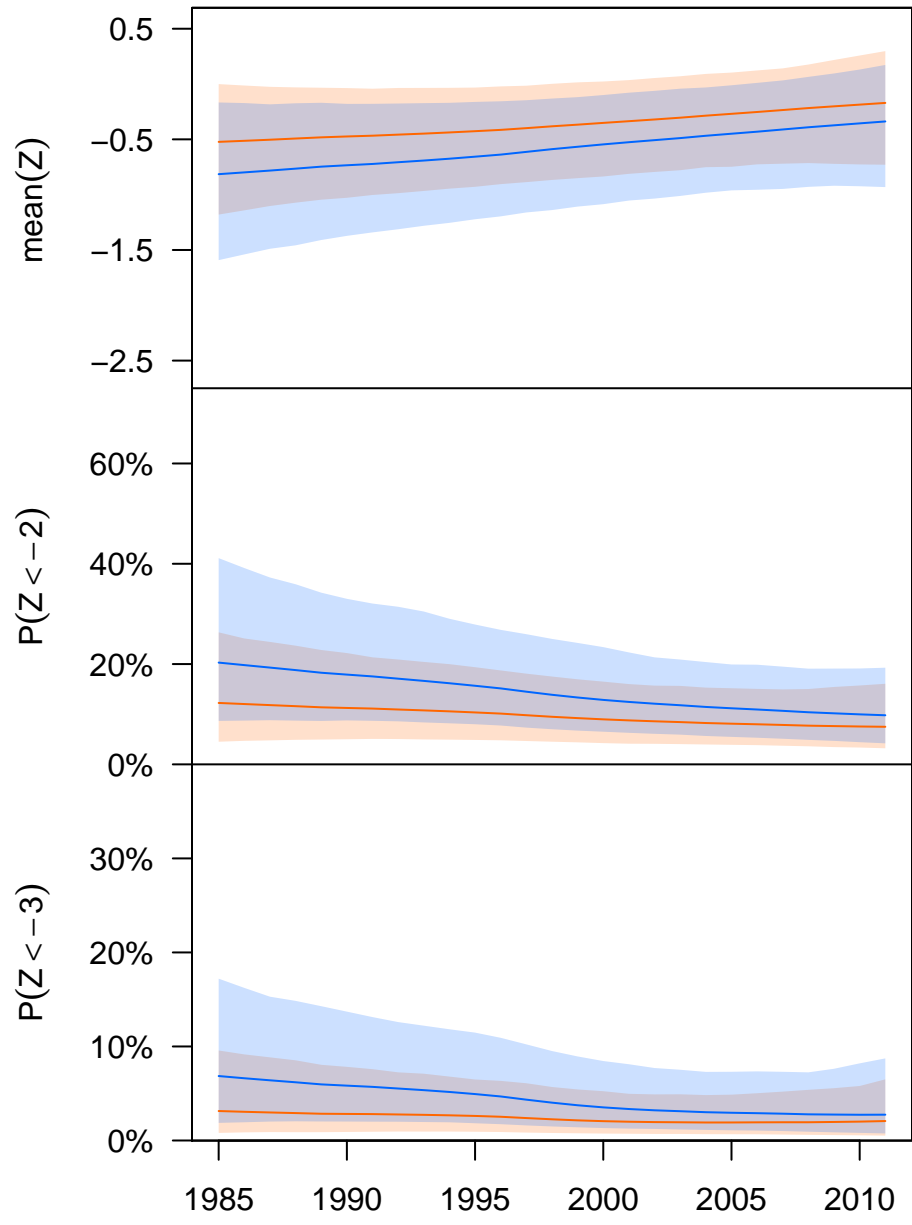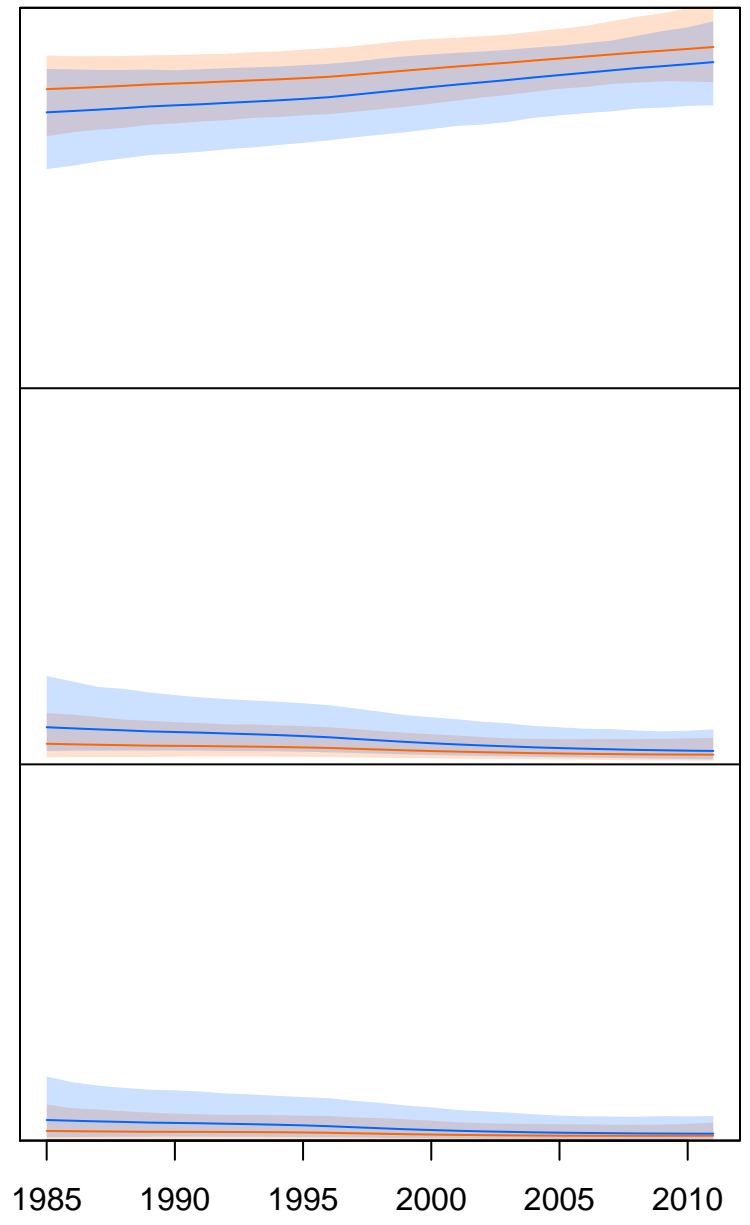

# Rwanda

## Sub-Saharan Africa Region

HAZ

WAZ

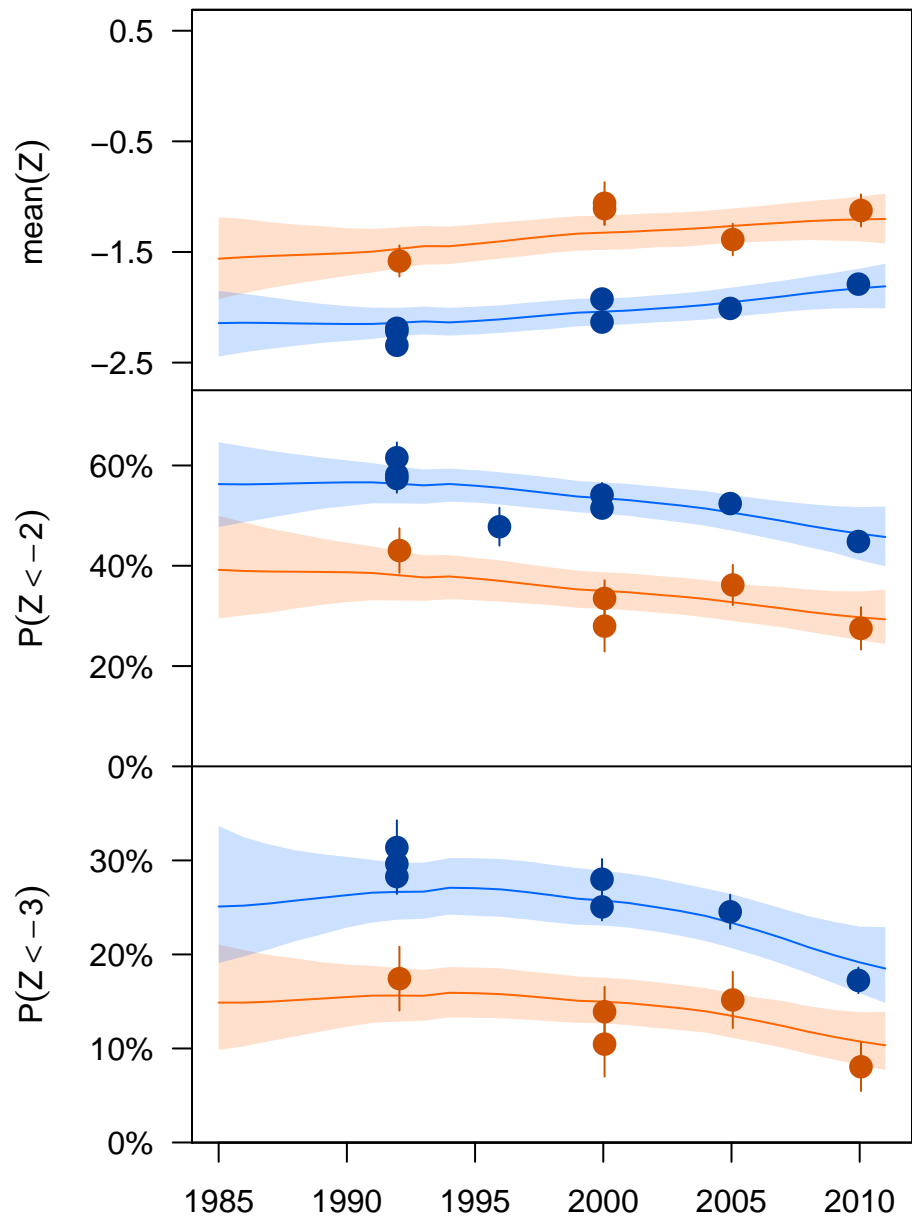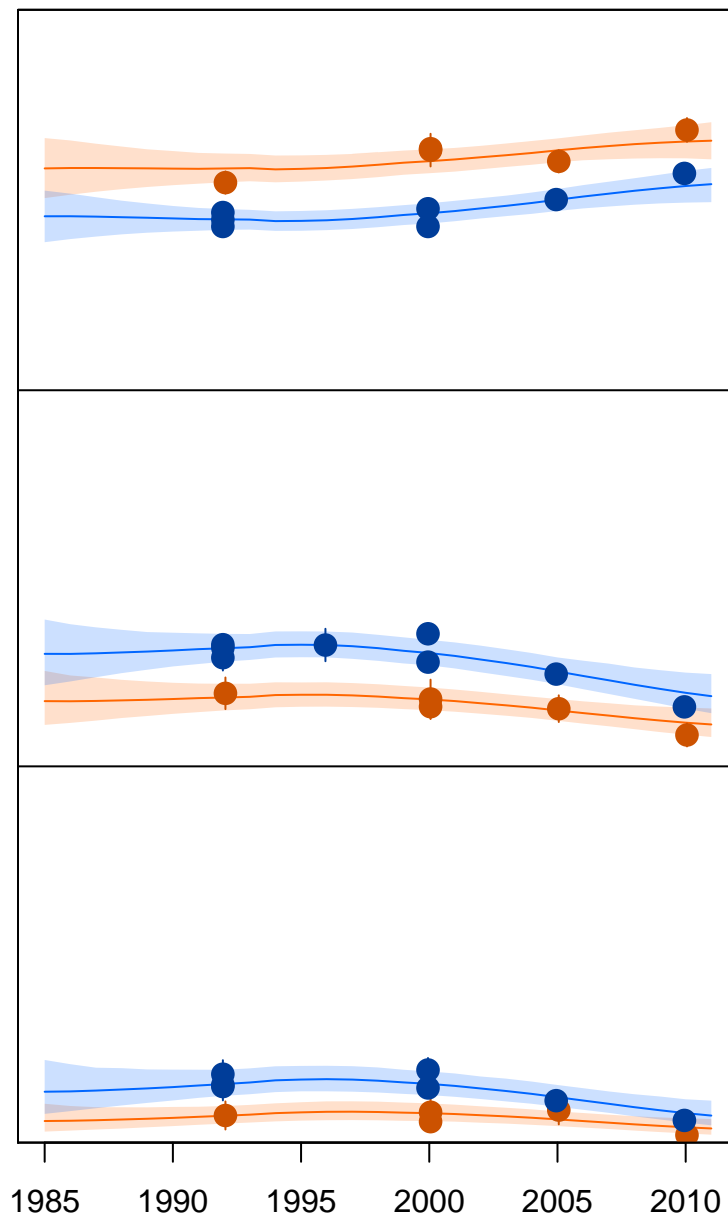



# Saint Lucia

Andean and Central Latin America and Caribbean Region

152

## HAZ

## WAZ

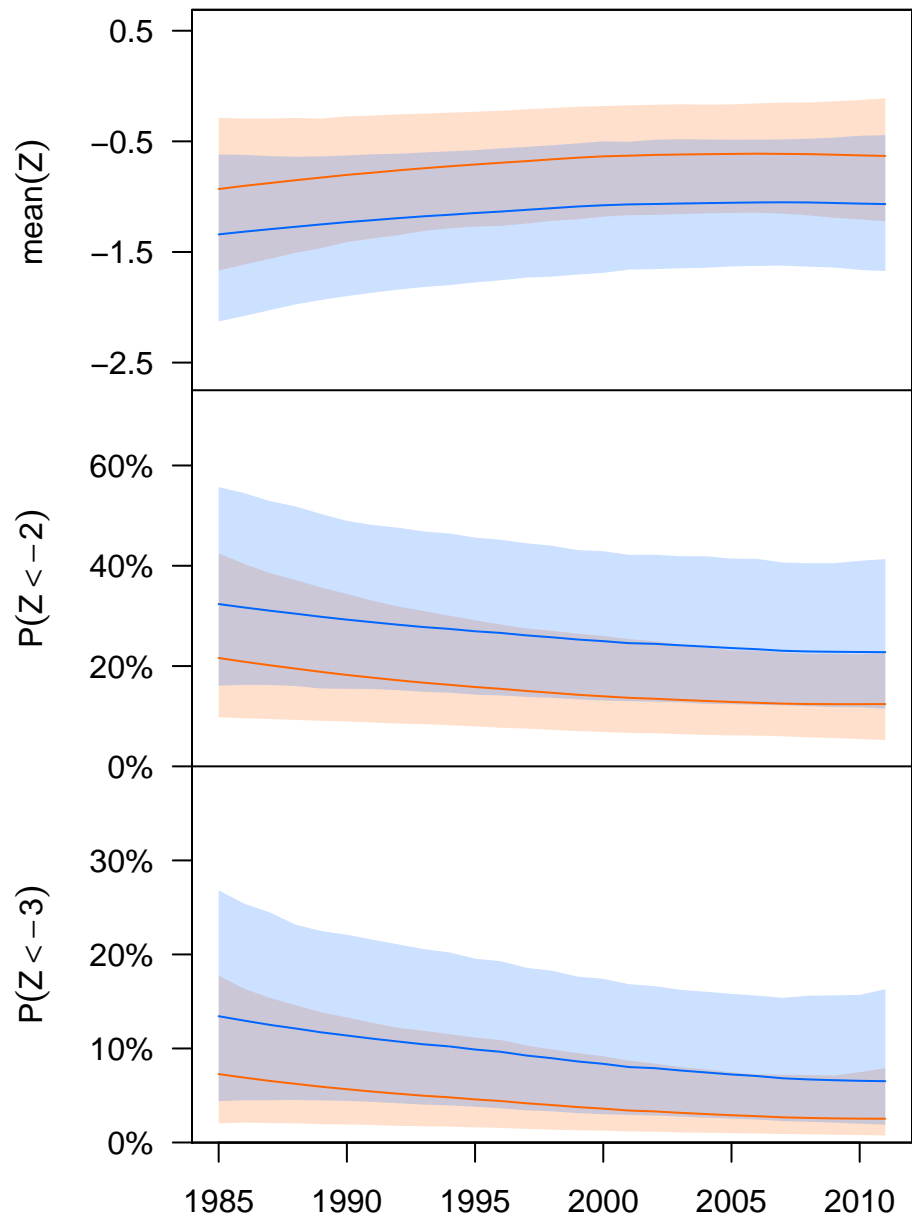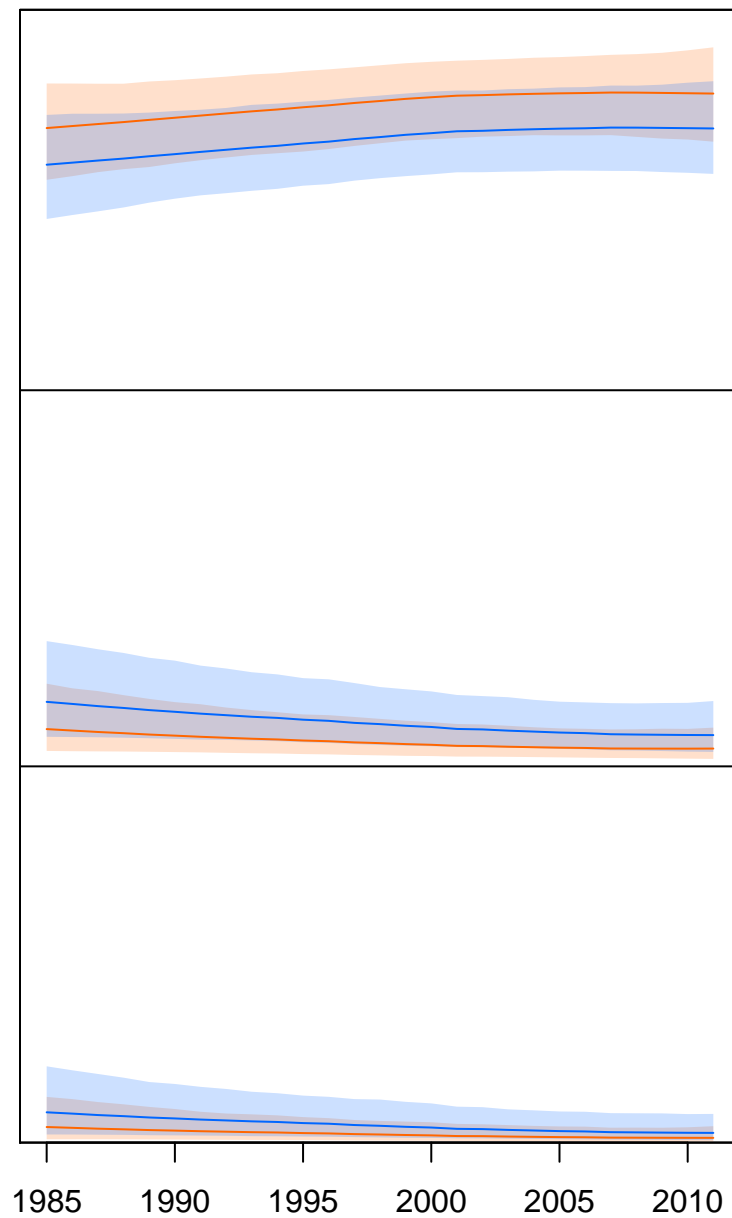

# Saint Vincent and the Grenadines

Andean and Central Latin America and Caribbean Region

HAZ

WAZ

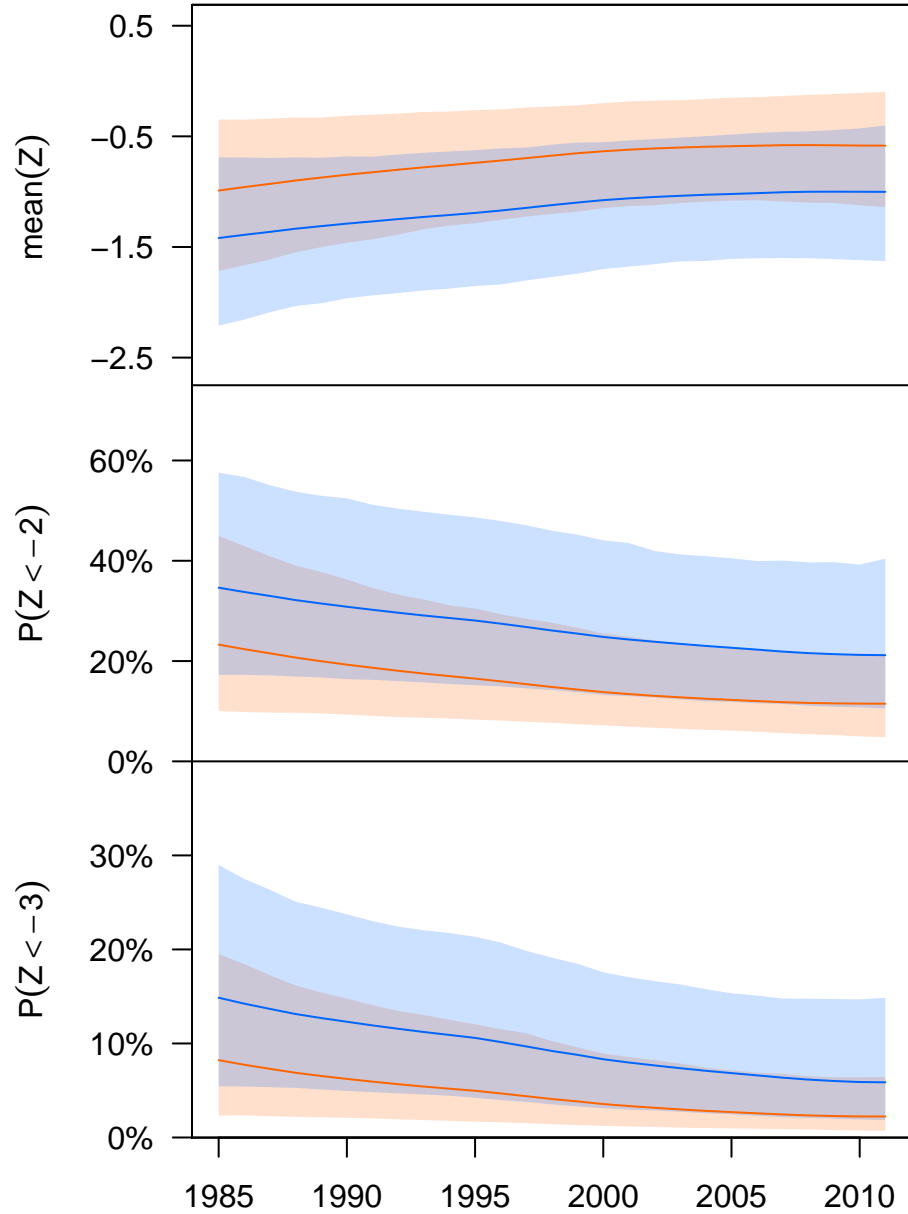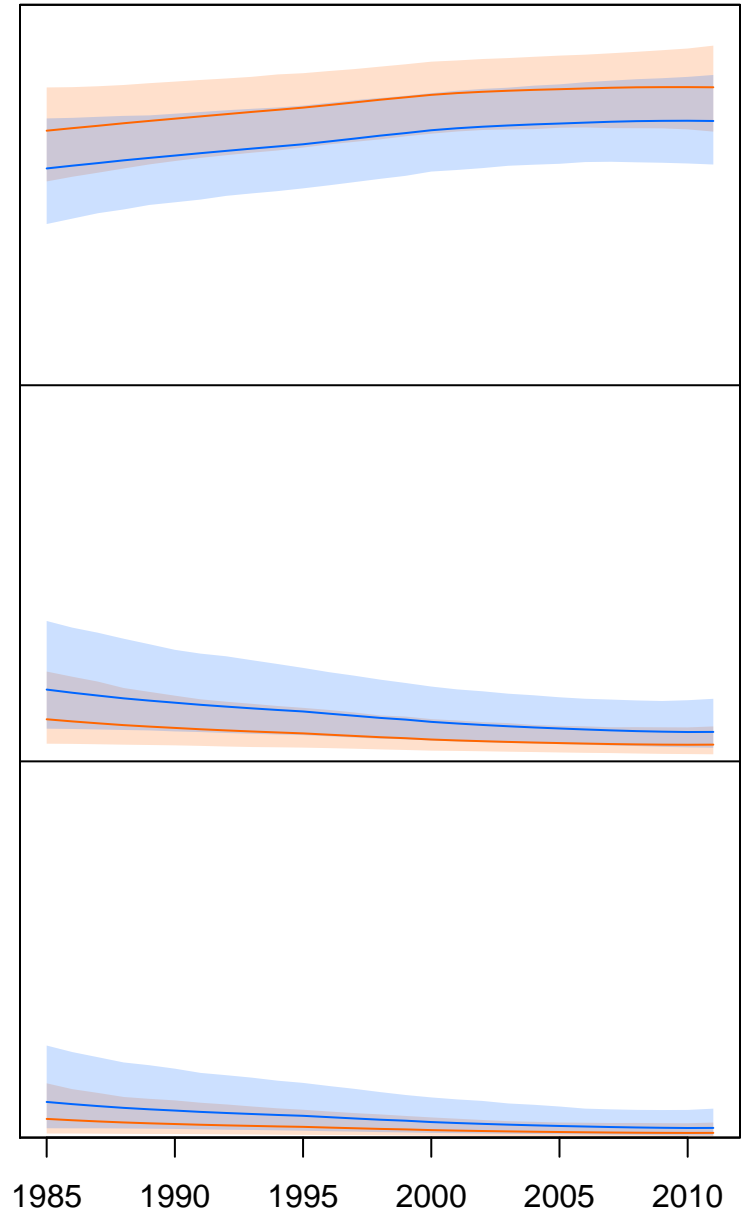

Samoa  
Oceania Region

HAZ

WAZ

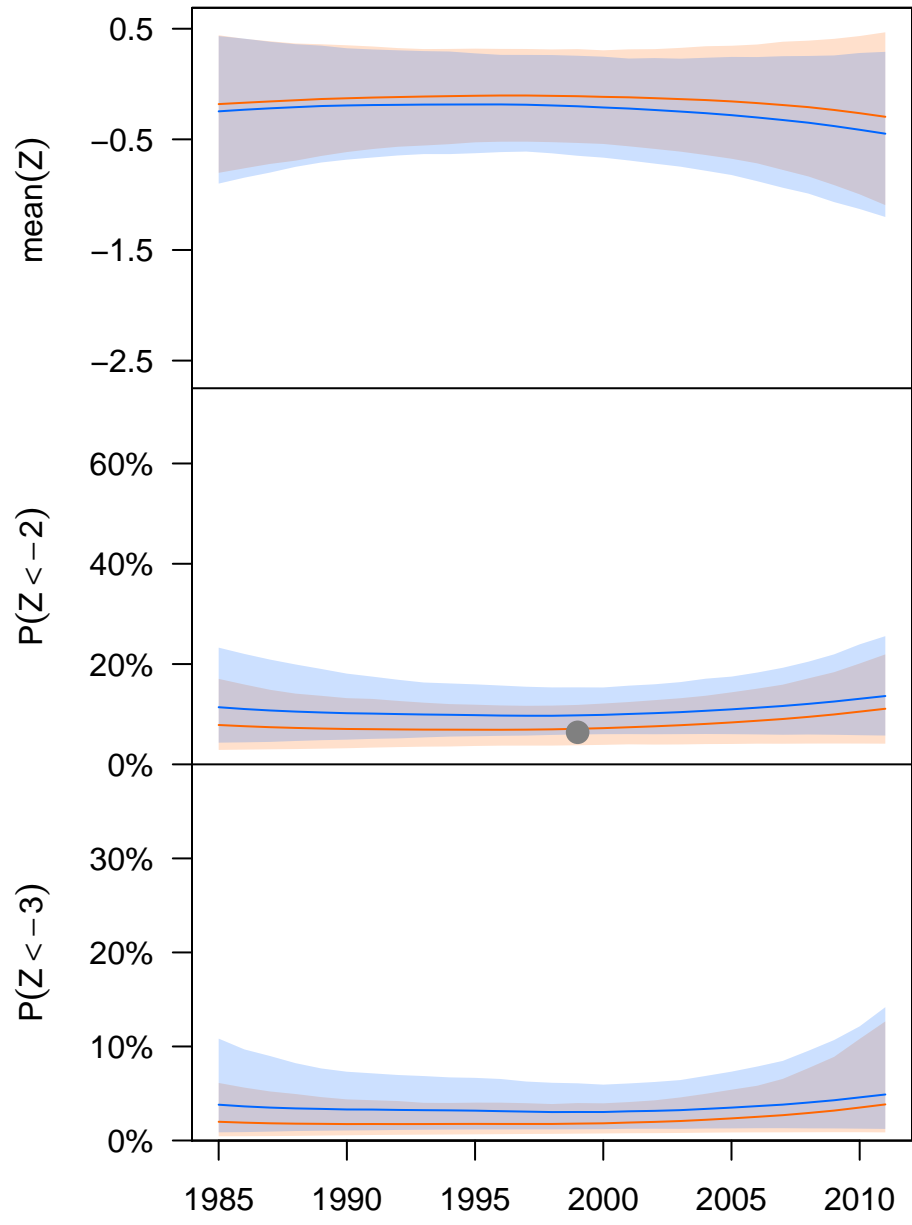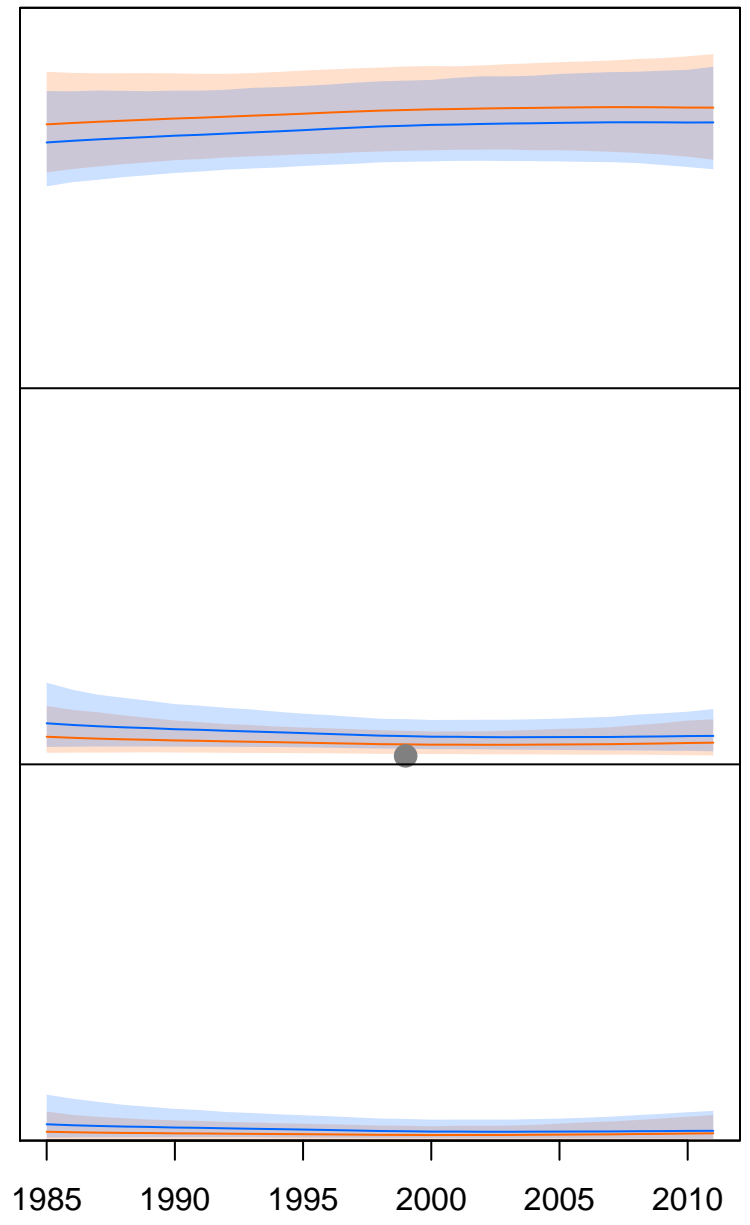

# São Tomé and Príncipe

## Sub-Saharan Africa Region

155

### HAZ

### WAZ

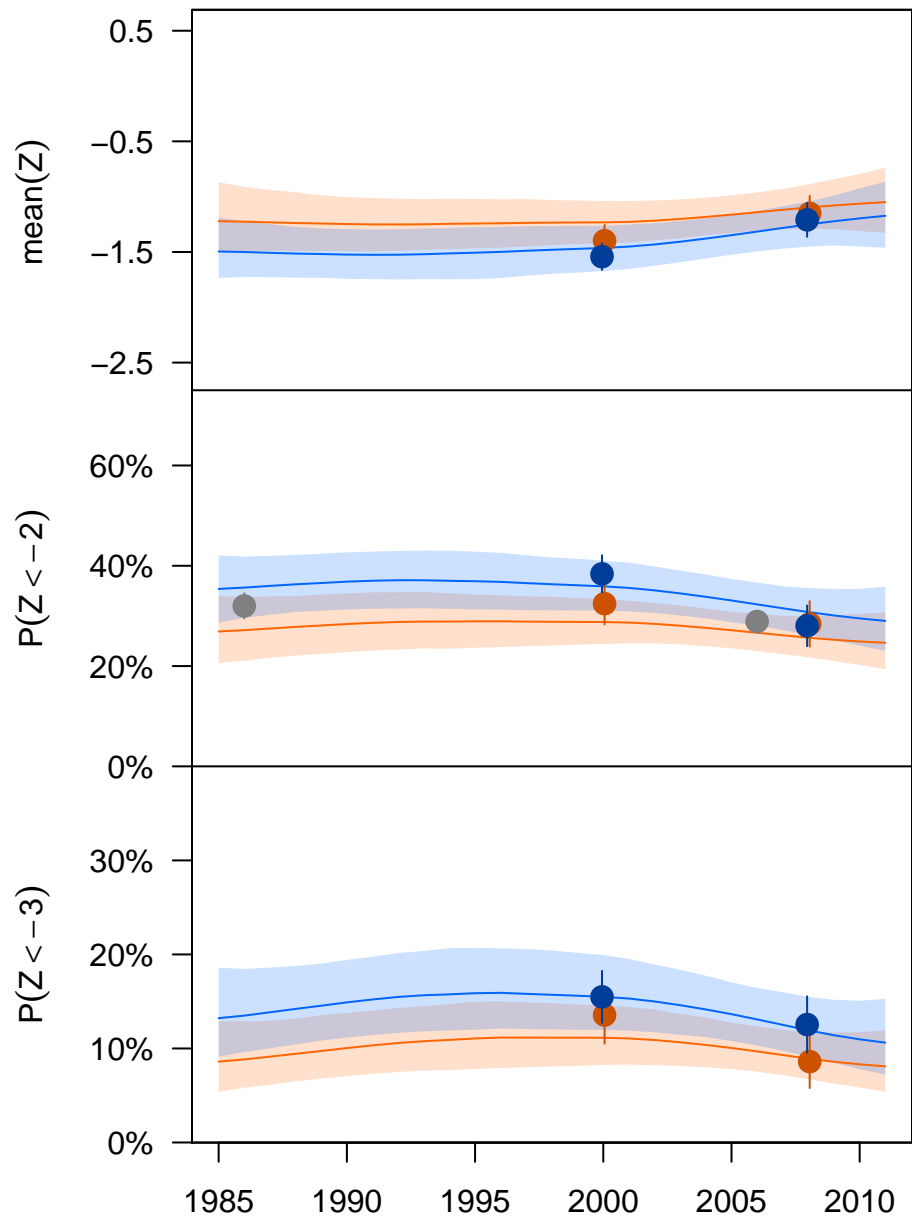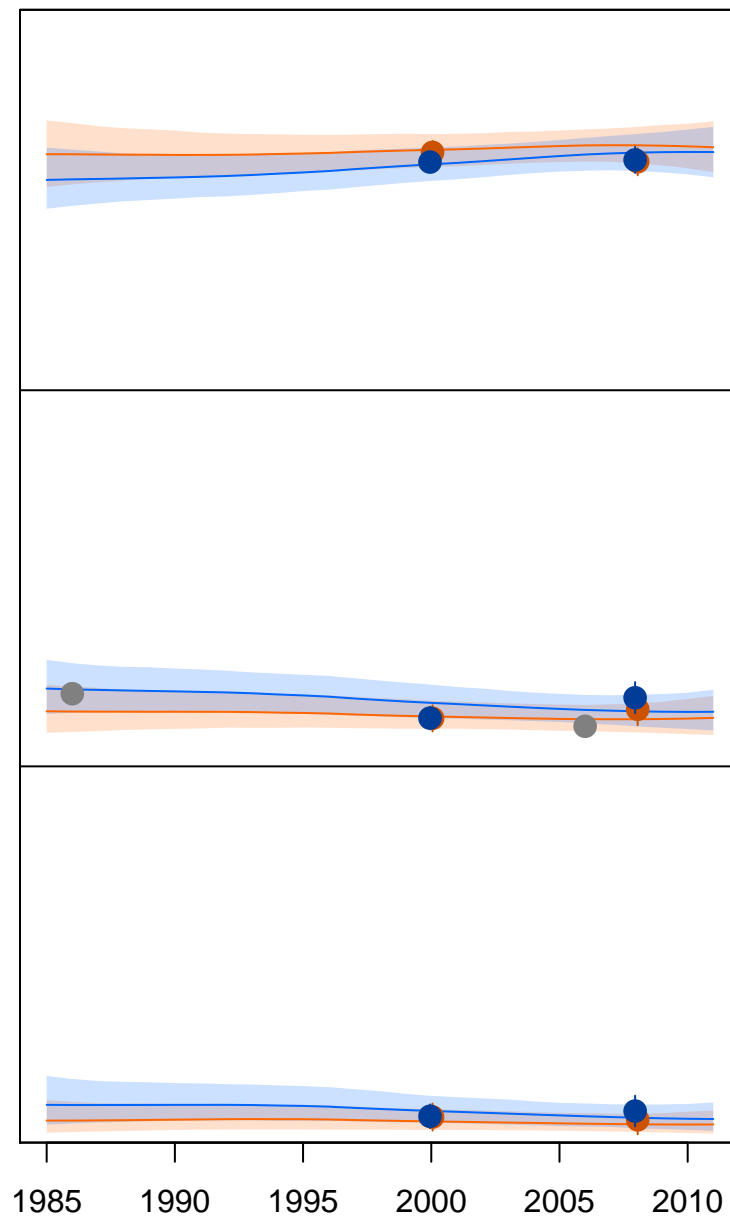

# Saudi Arabia

Central Asia, Middle East, and North Africa Region

156

## HAZ

## WAZ

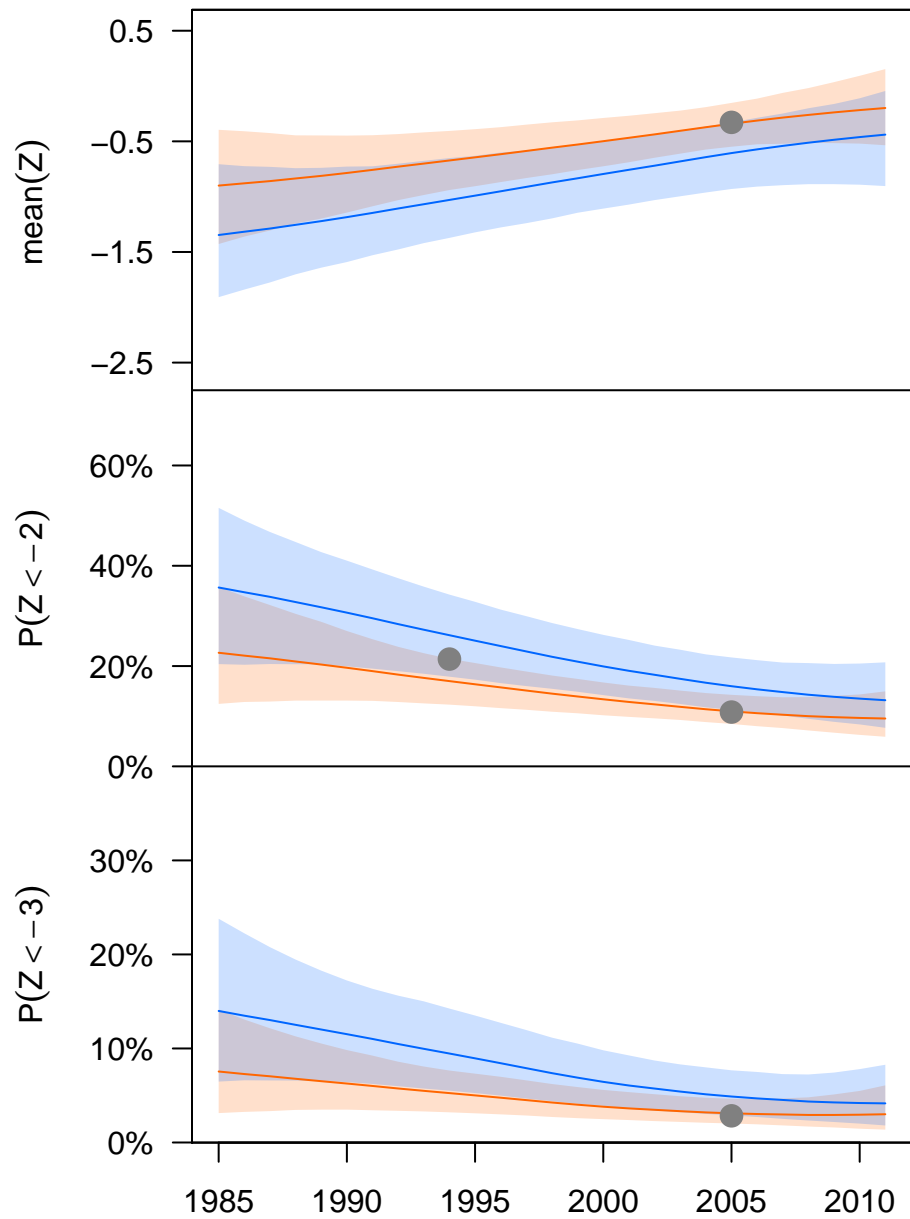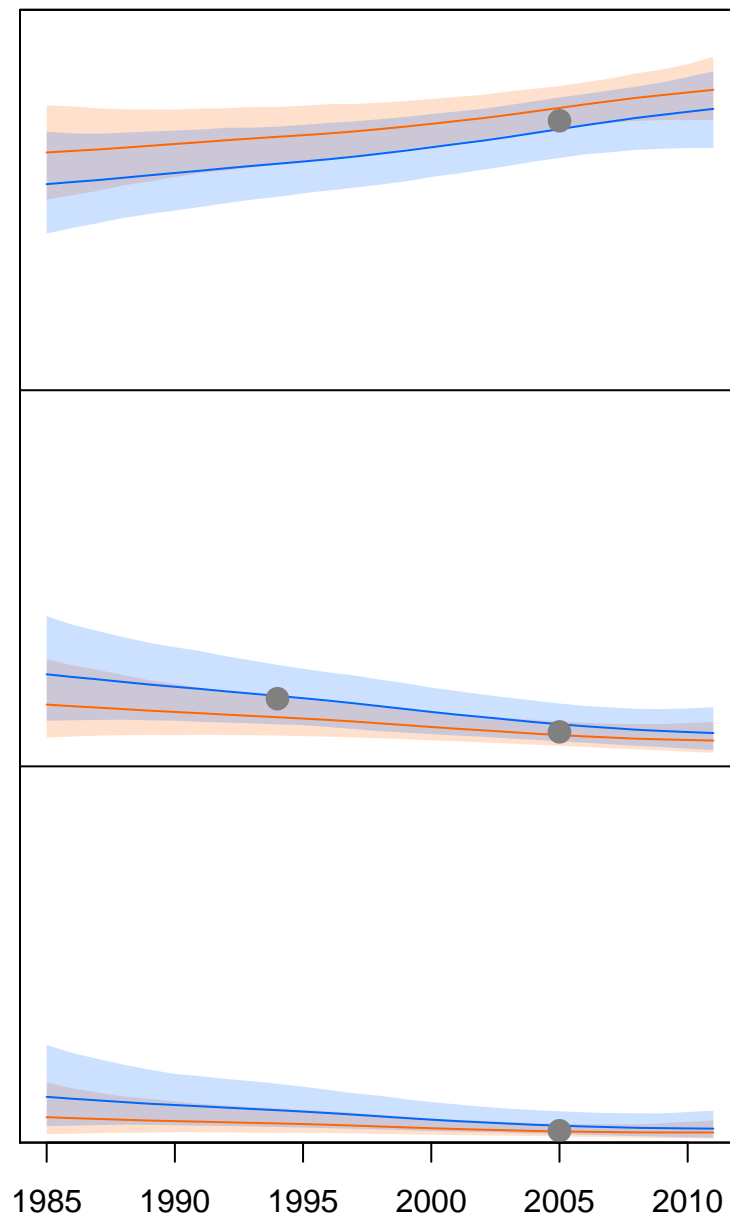

# Senegal

## Sub-Saharan Africa Region

HAZ

WAZ

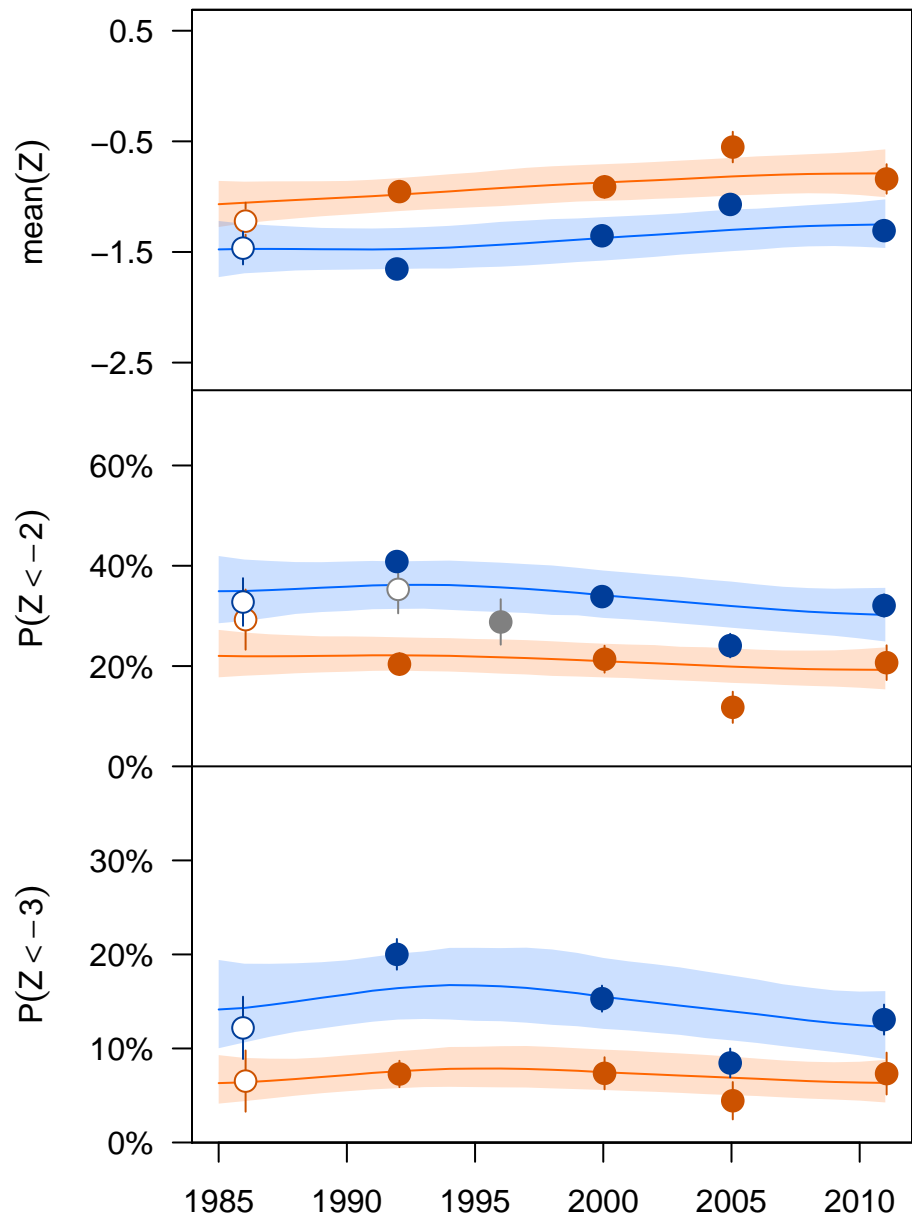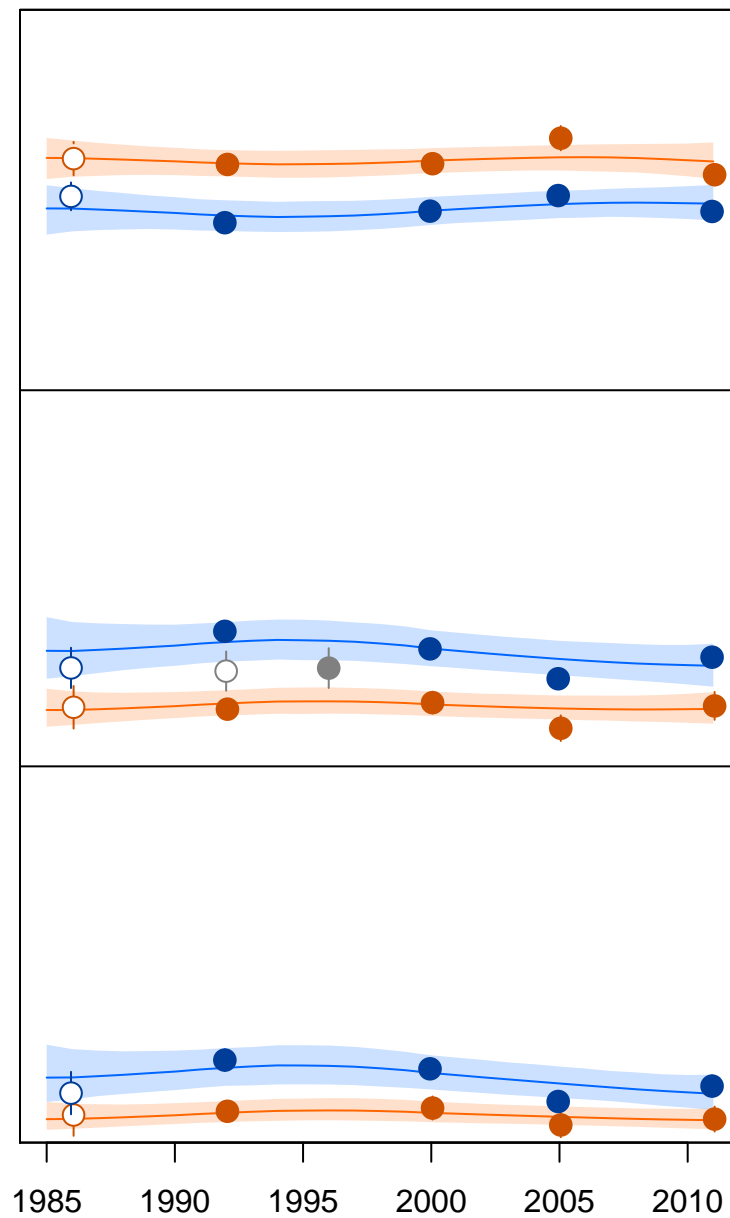

# Seychelles

## Sub-Saharan Africa Region

158

### HAZ

### WAZ

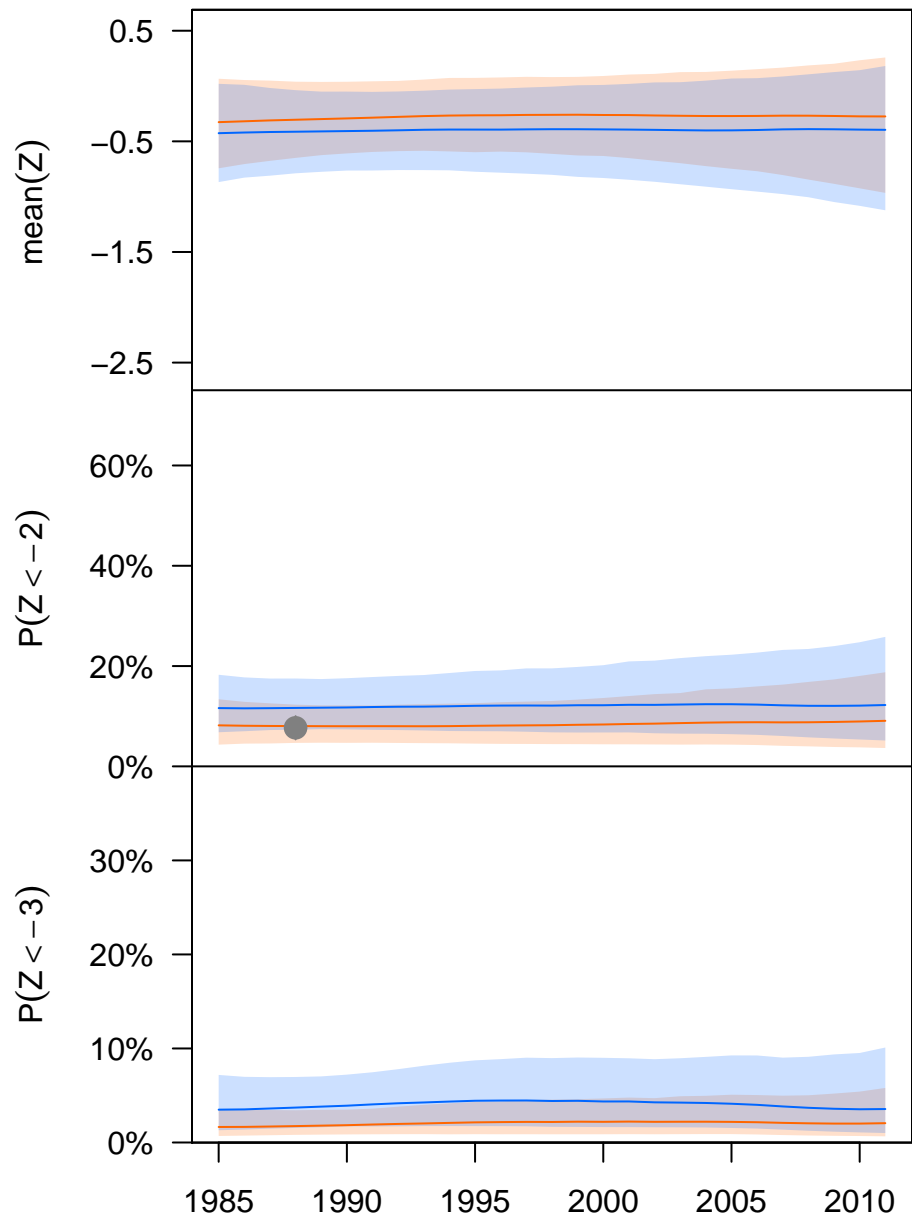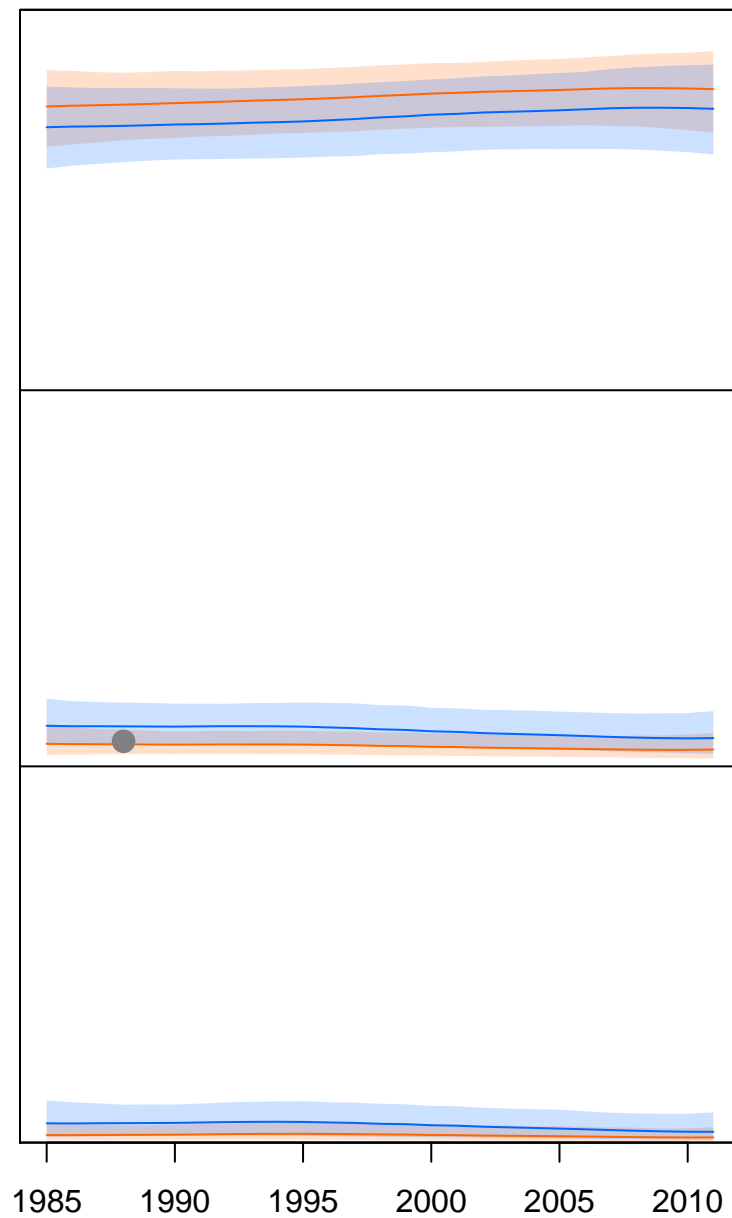

# Sierra Leone

## Sub-Saharan Africa Region

### HAZ

### WAZ

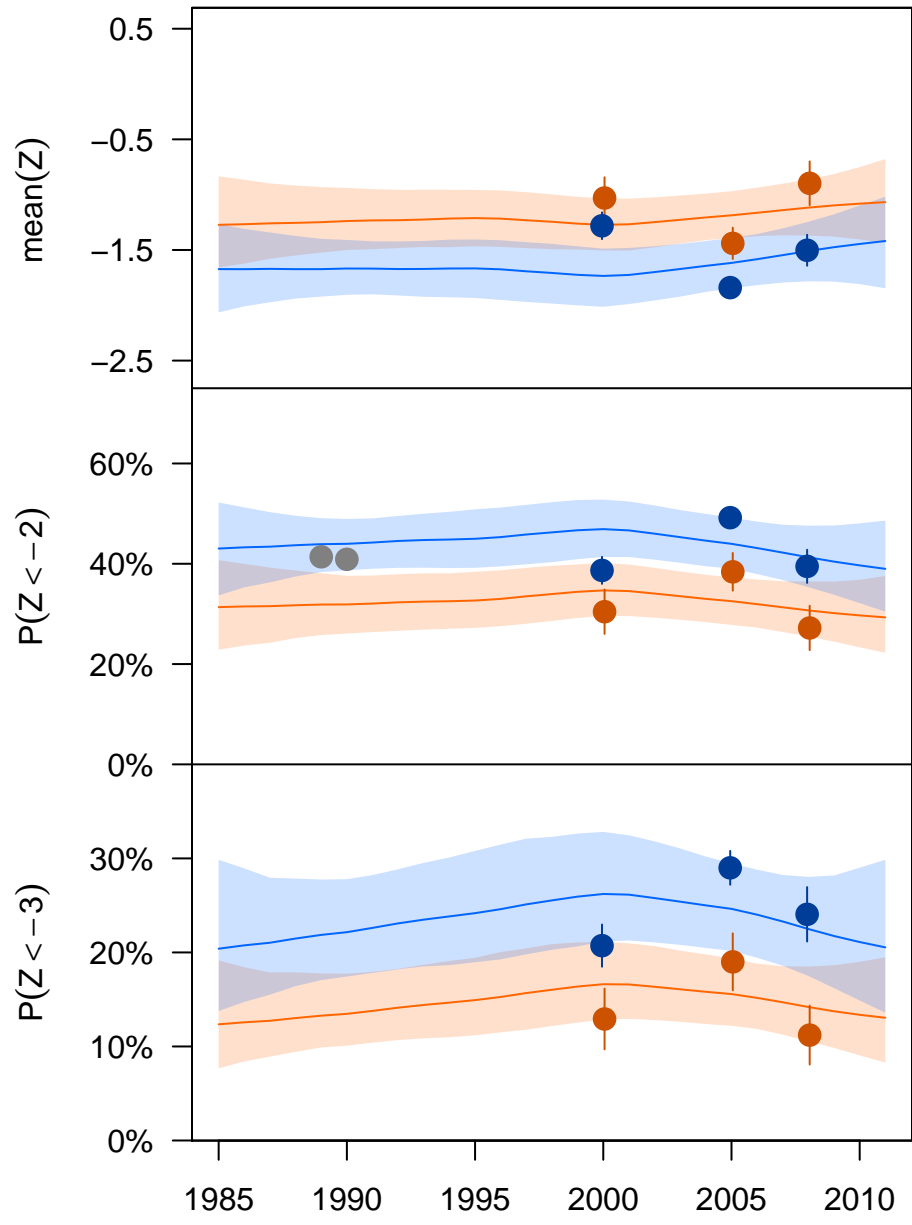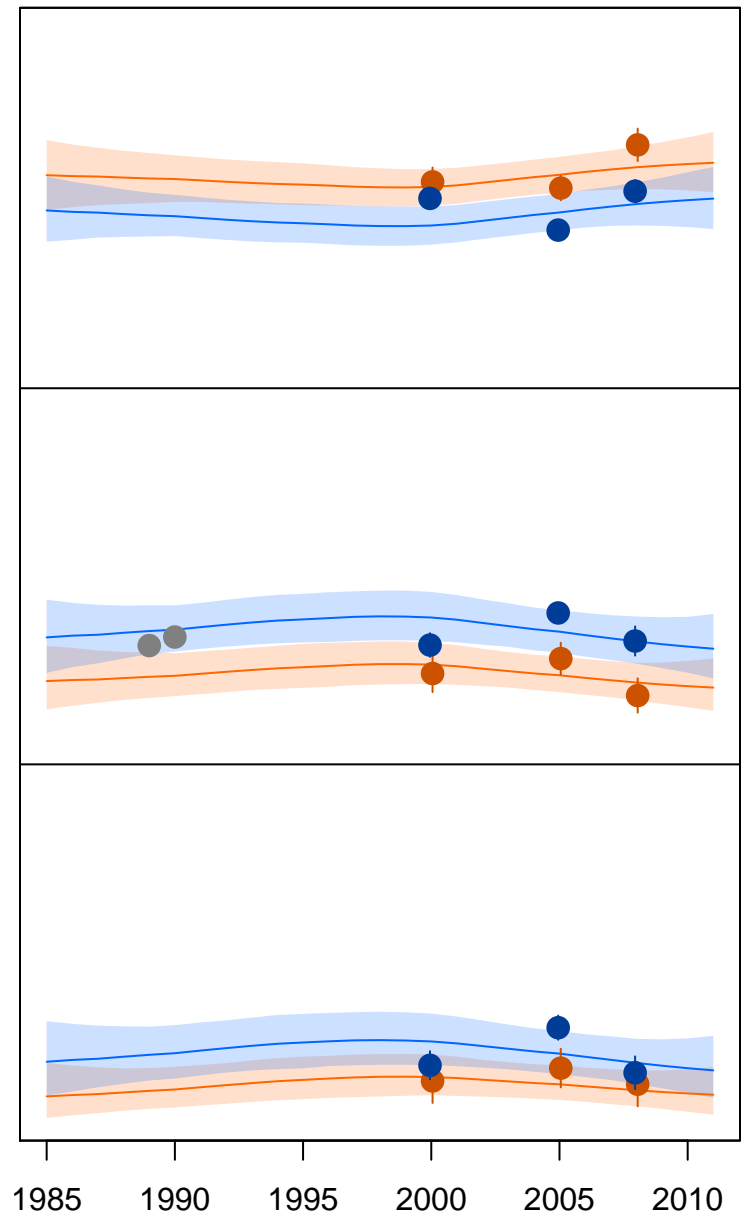



# Solomon Islands

Oceania Region

160

## HAZ

## WAZ

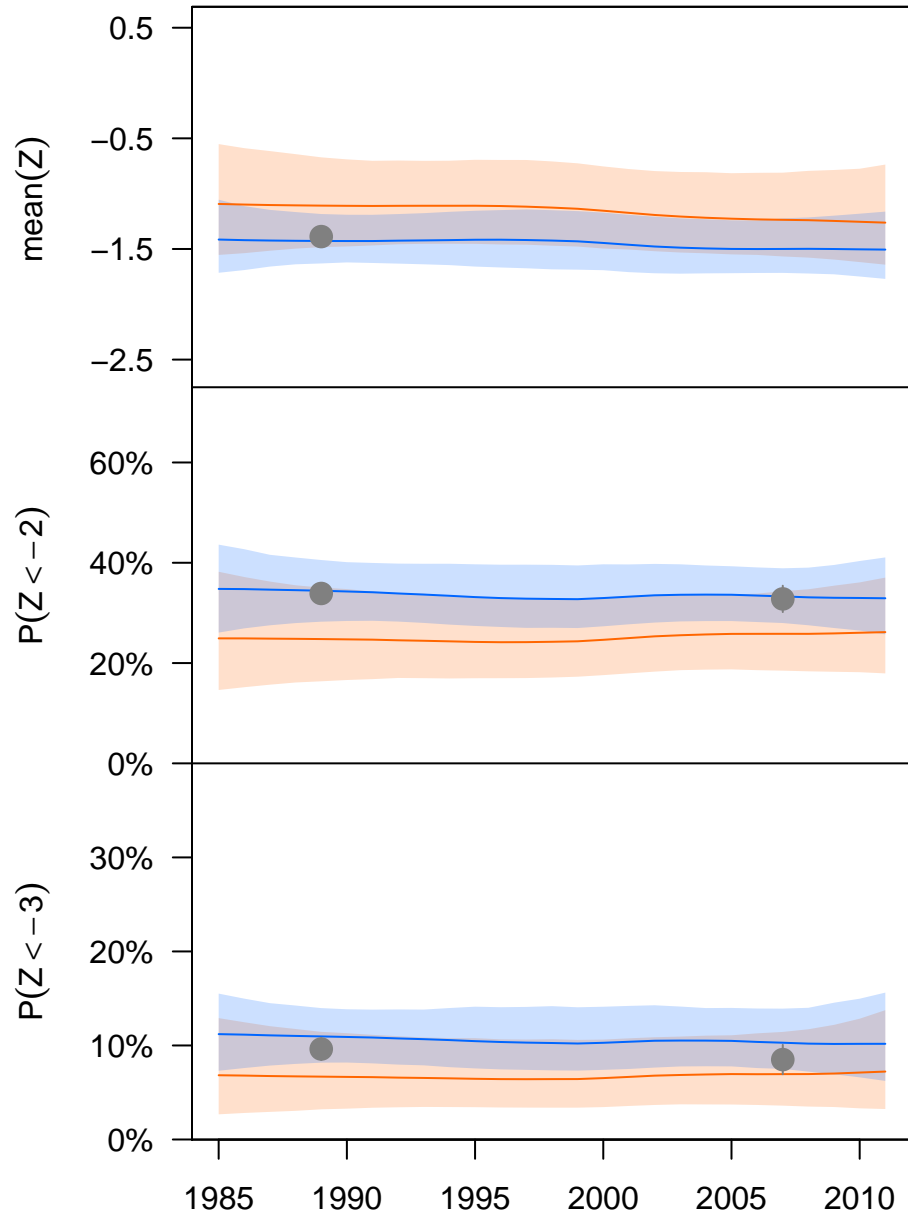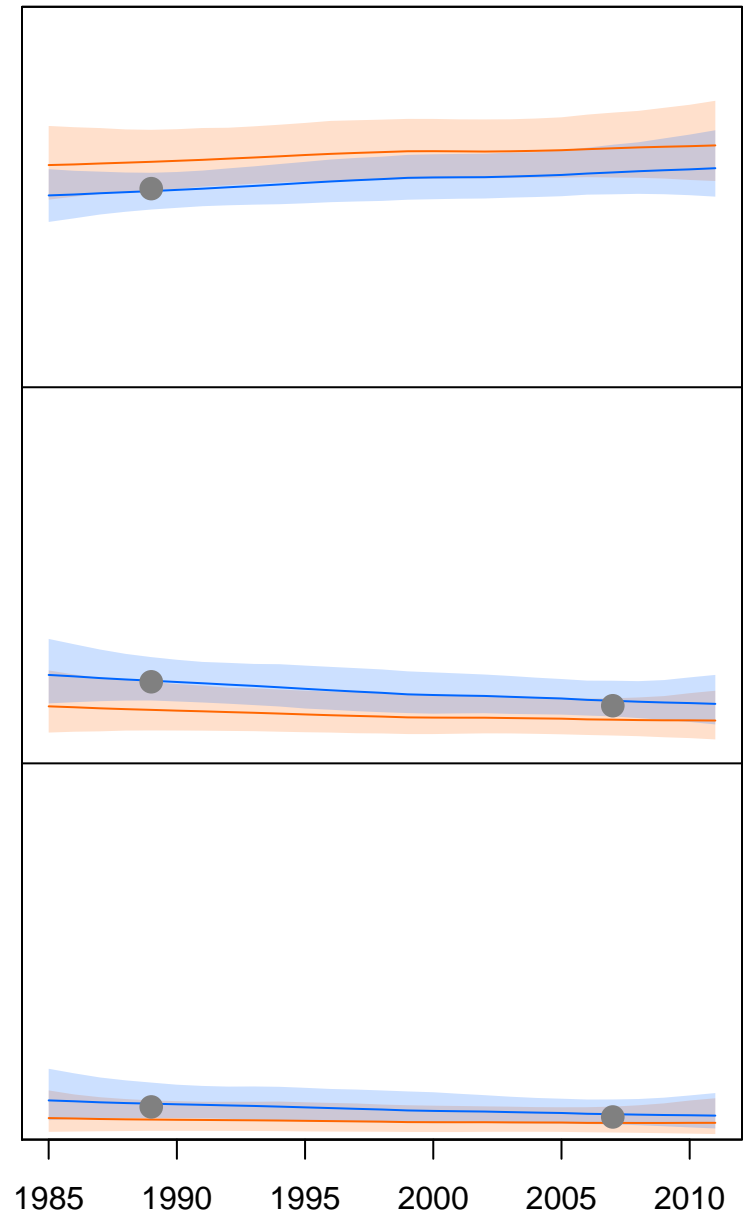

# Somalia

## Sub-Saharan Africa Region

161

### HAZ

### WAZ

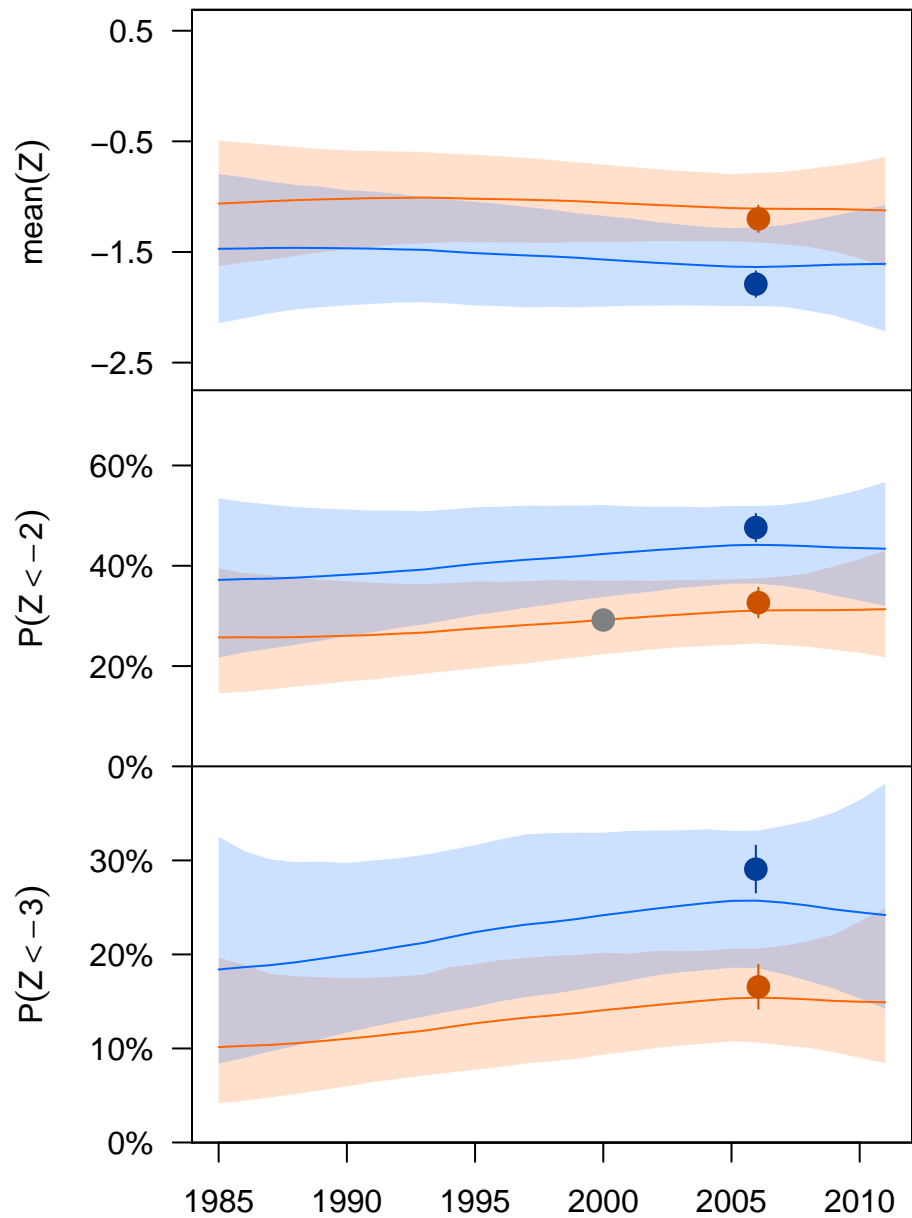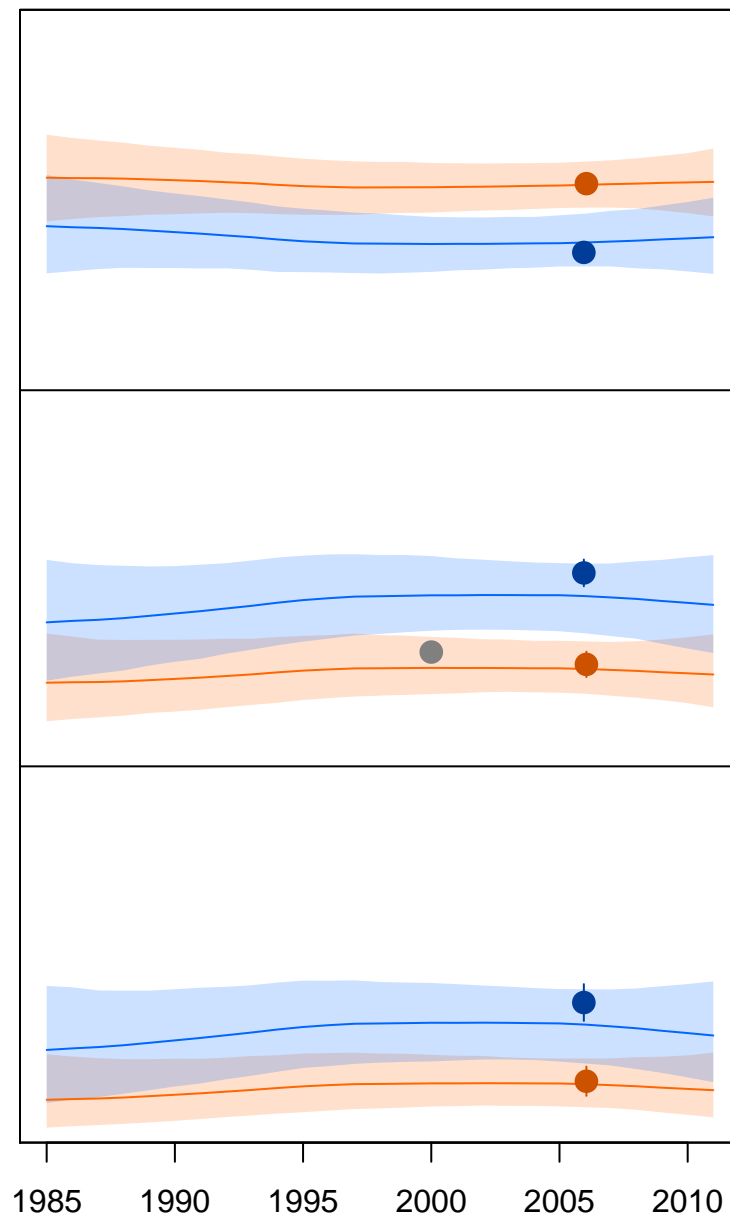

# South Africa

## Sub-Saharan Africa Region

### HAZ

### WAZ

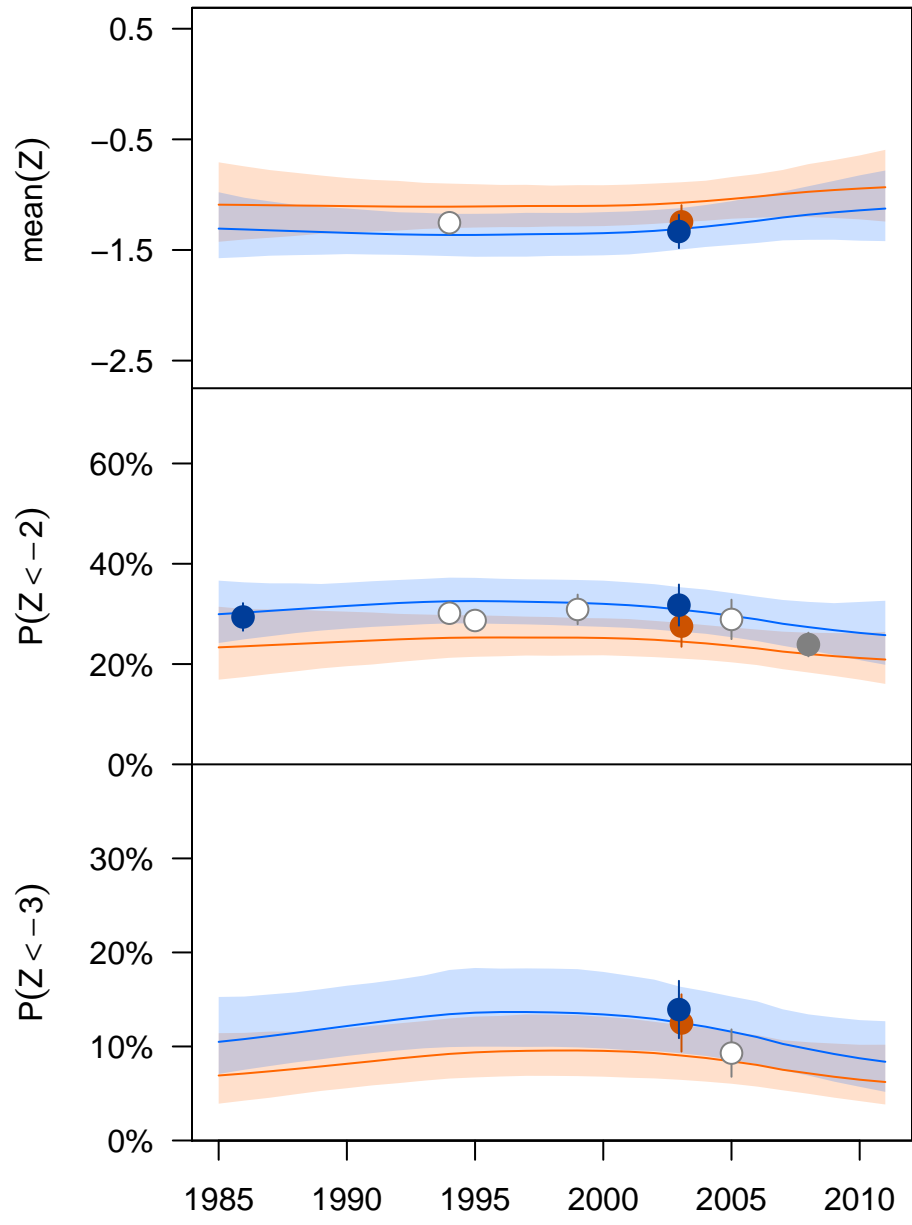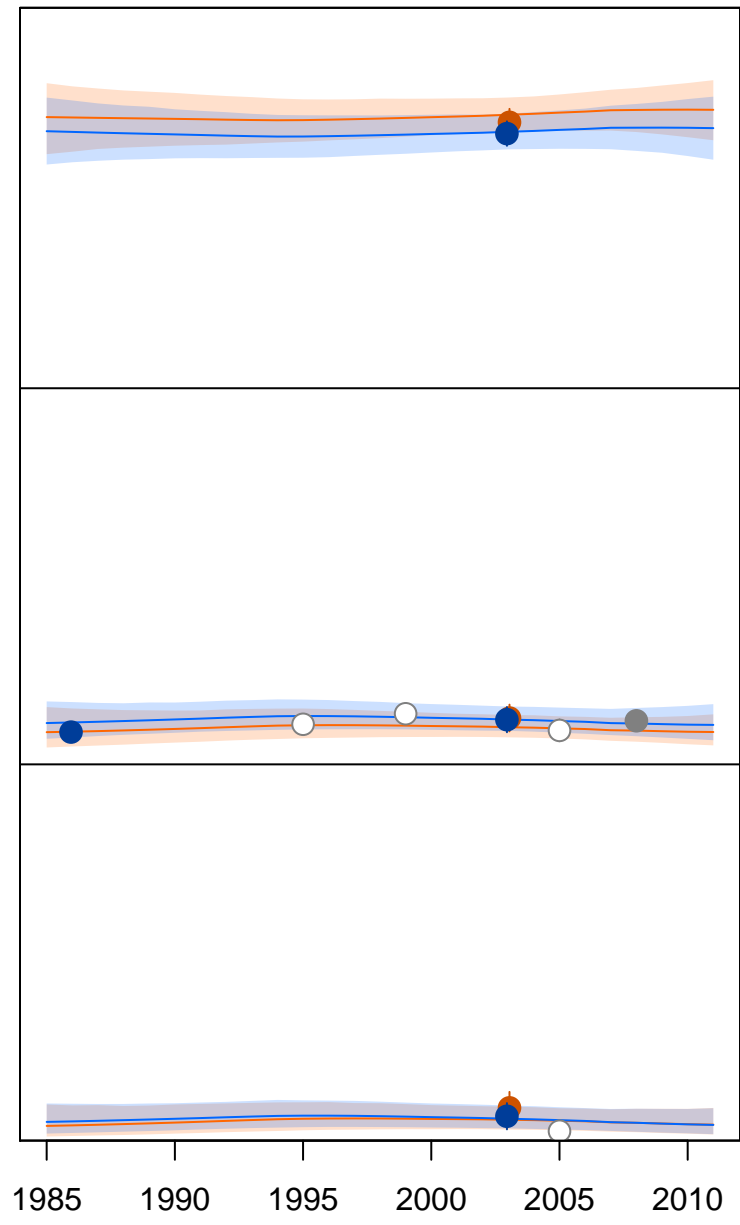

# Sri Lanka

## East and Southeast Asia Region

### HAZ

### WAZ

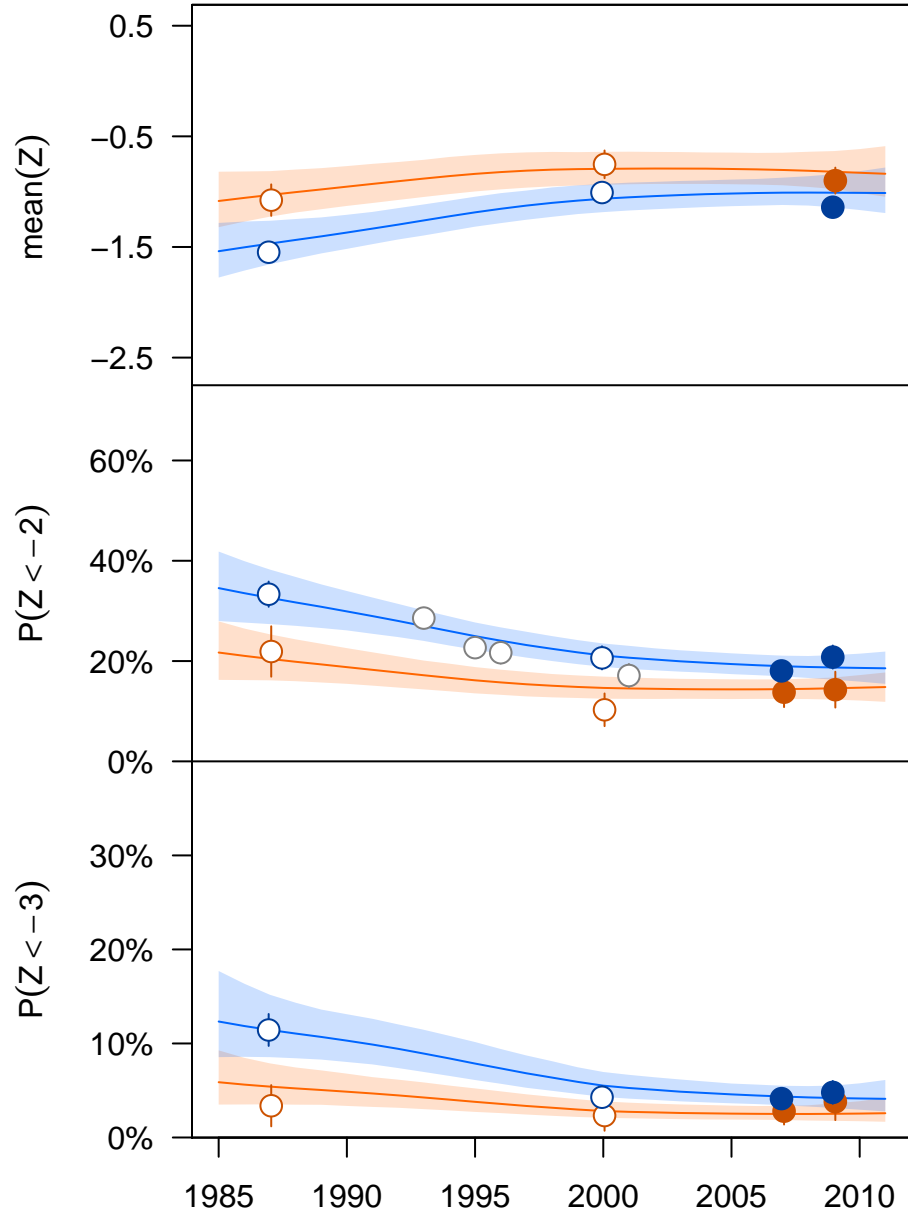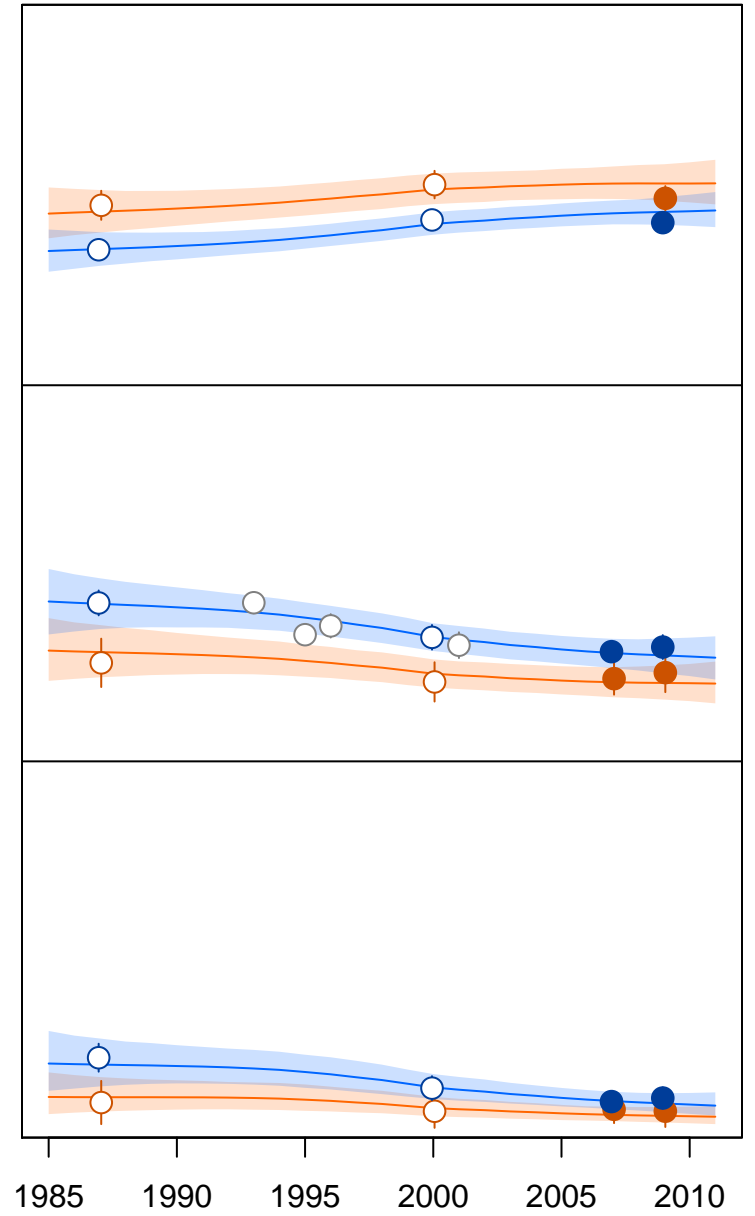

# Sudan

## Sub-Saharan Africa Region

### HAZ

### WAZ

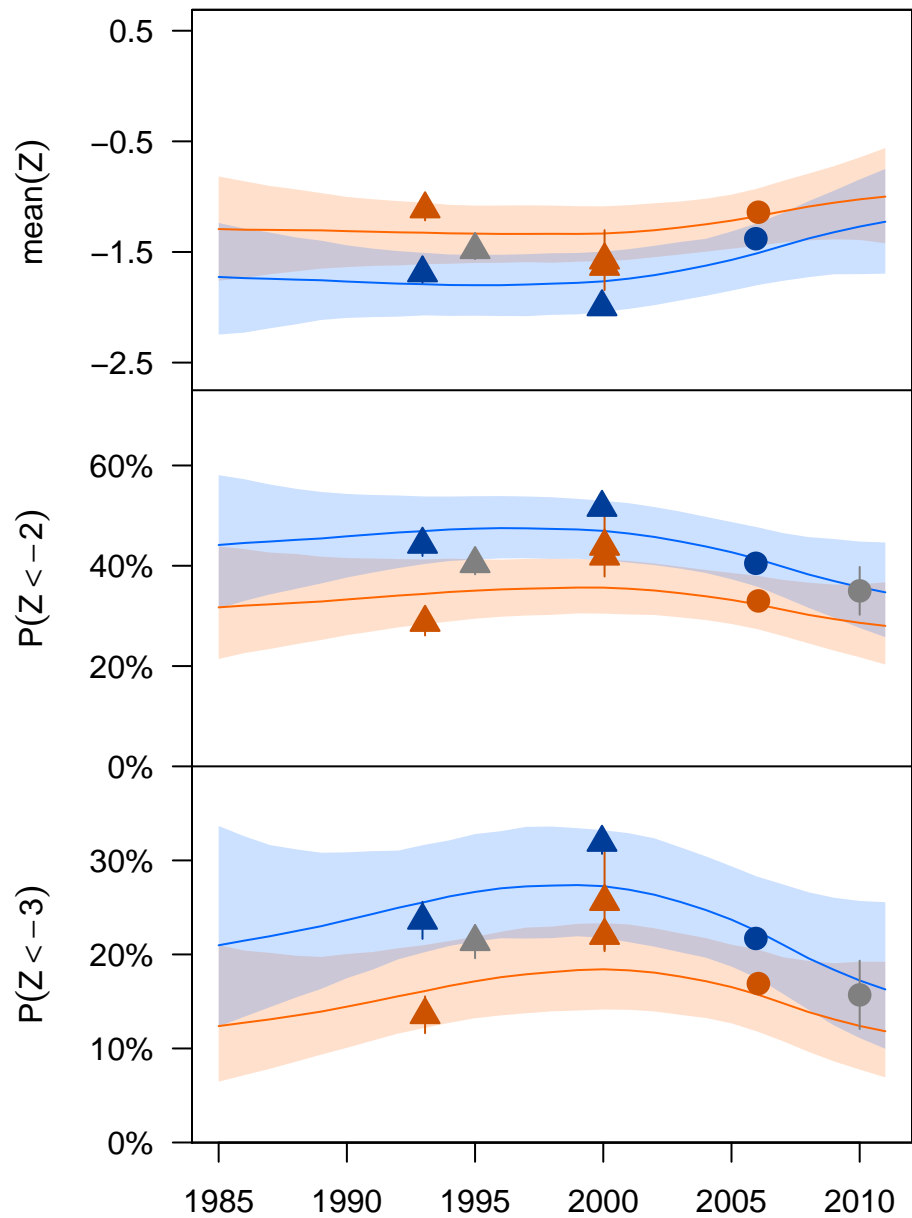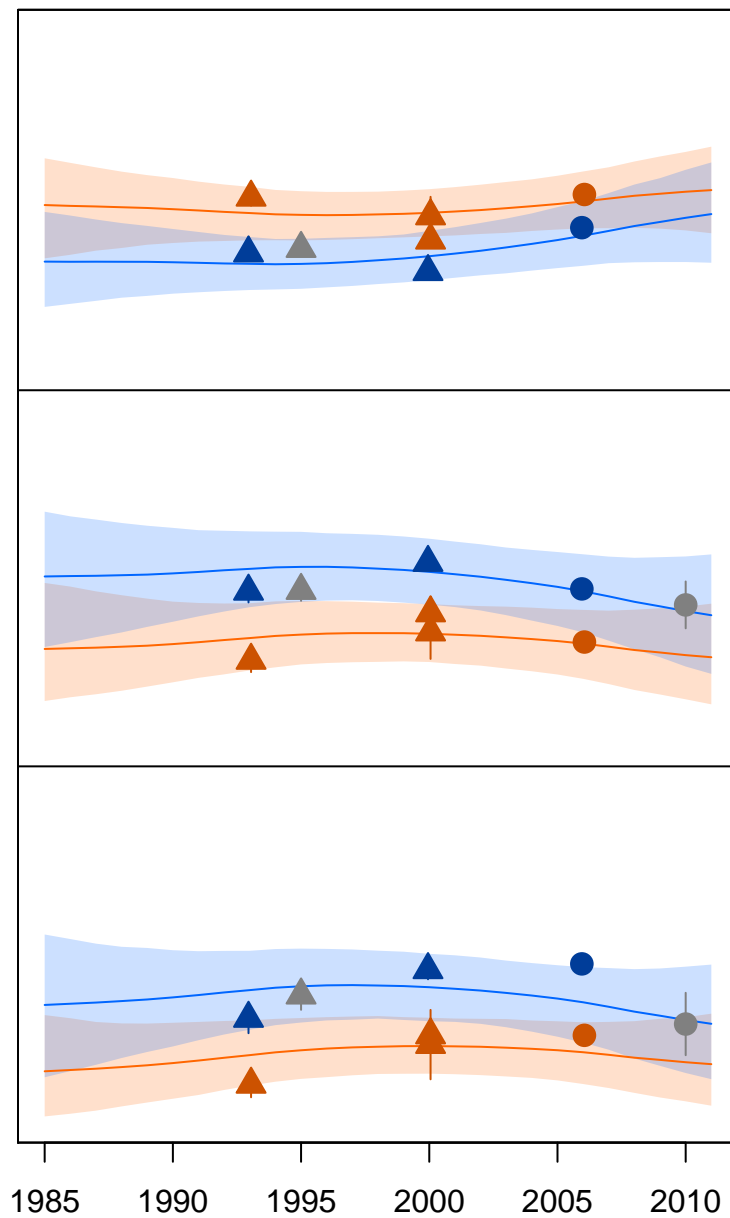

# Suriname

Andean and Central Latin America and Caribbean Region

165

## HAZ

## WAZ

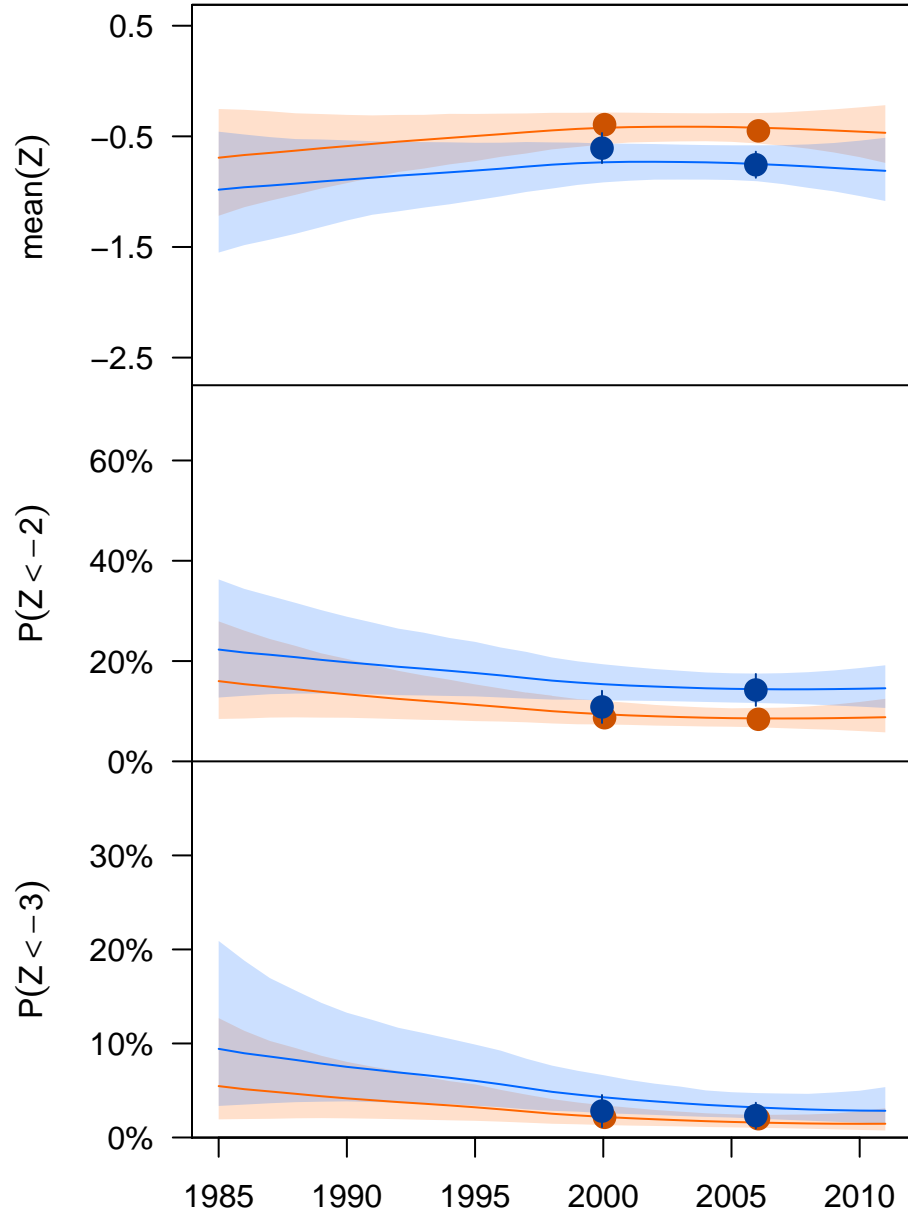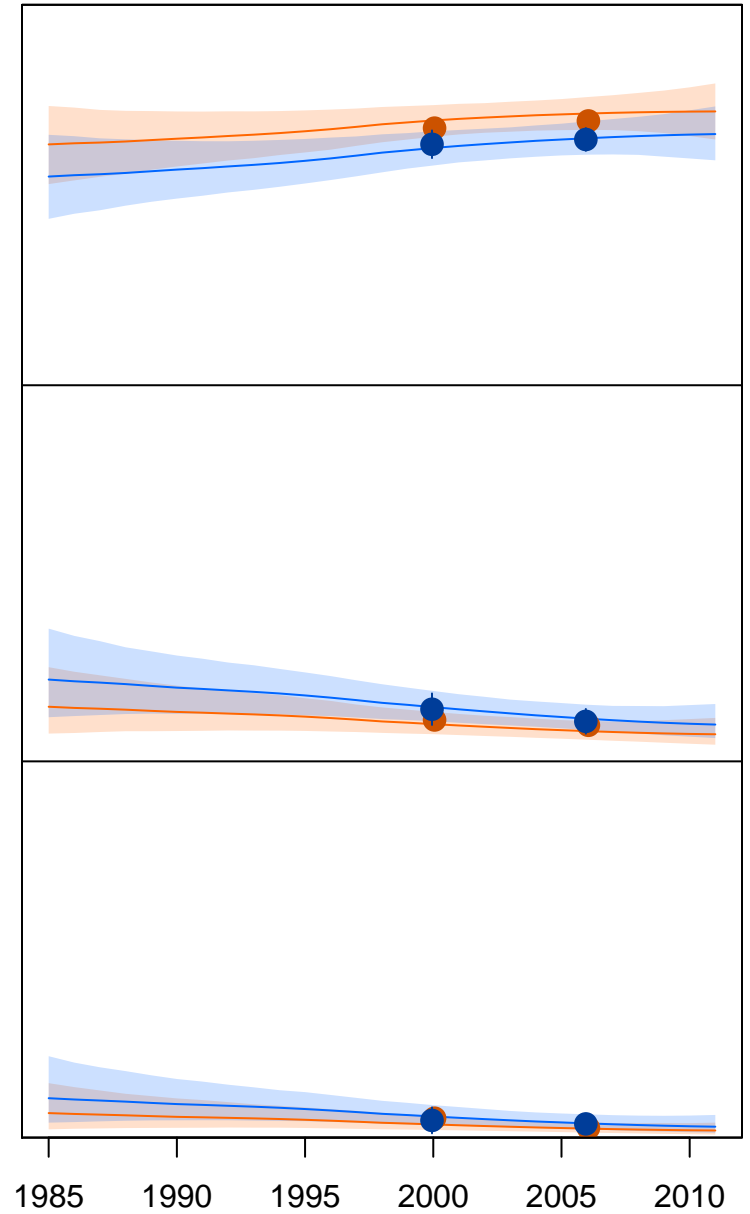

# Swaziland

## Sub-Saharan Africa Region

### HAZ

### WAZ

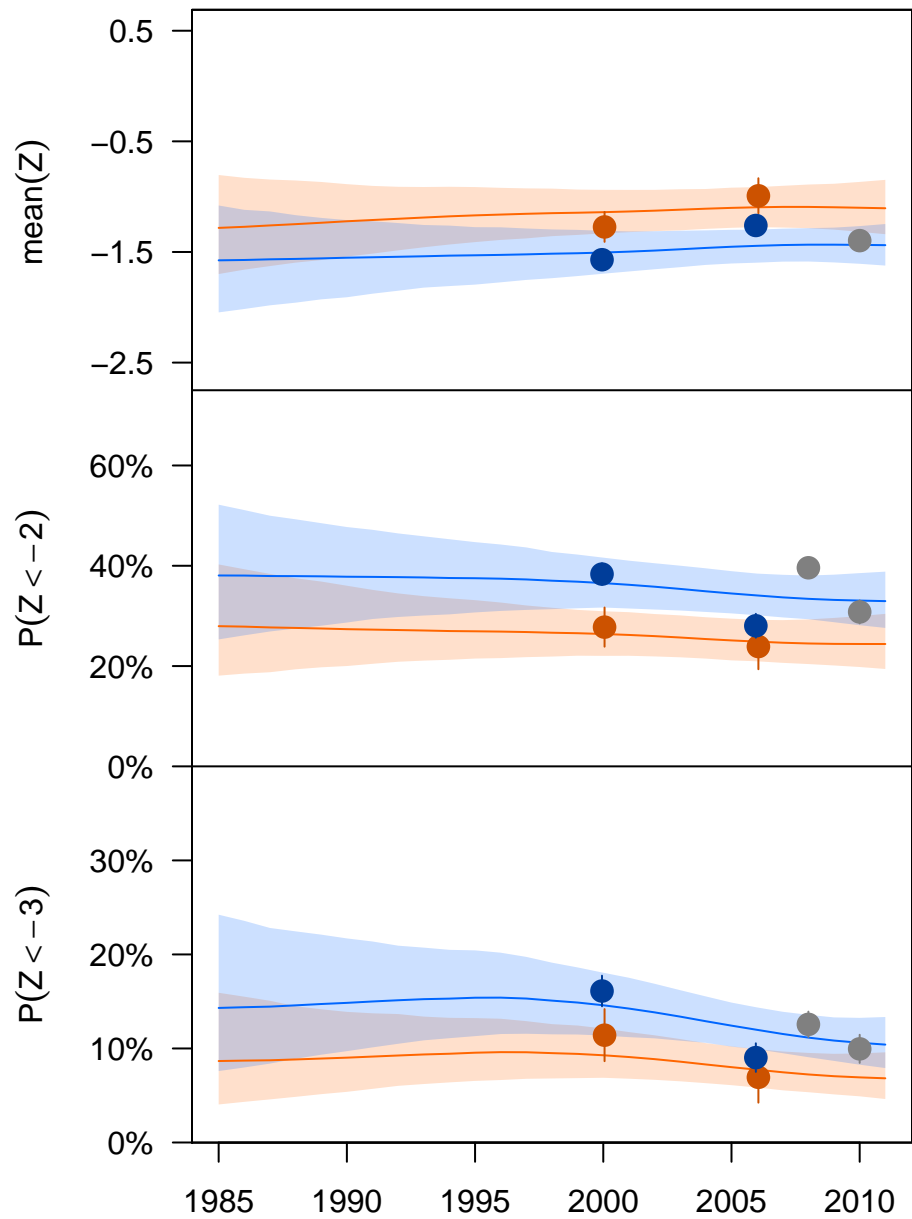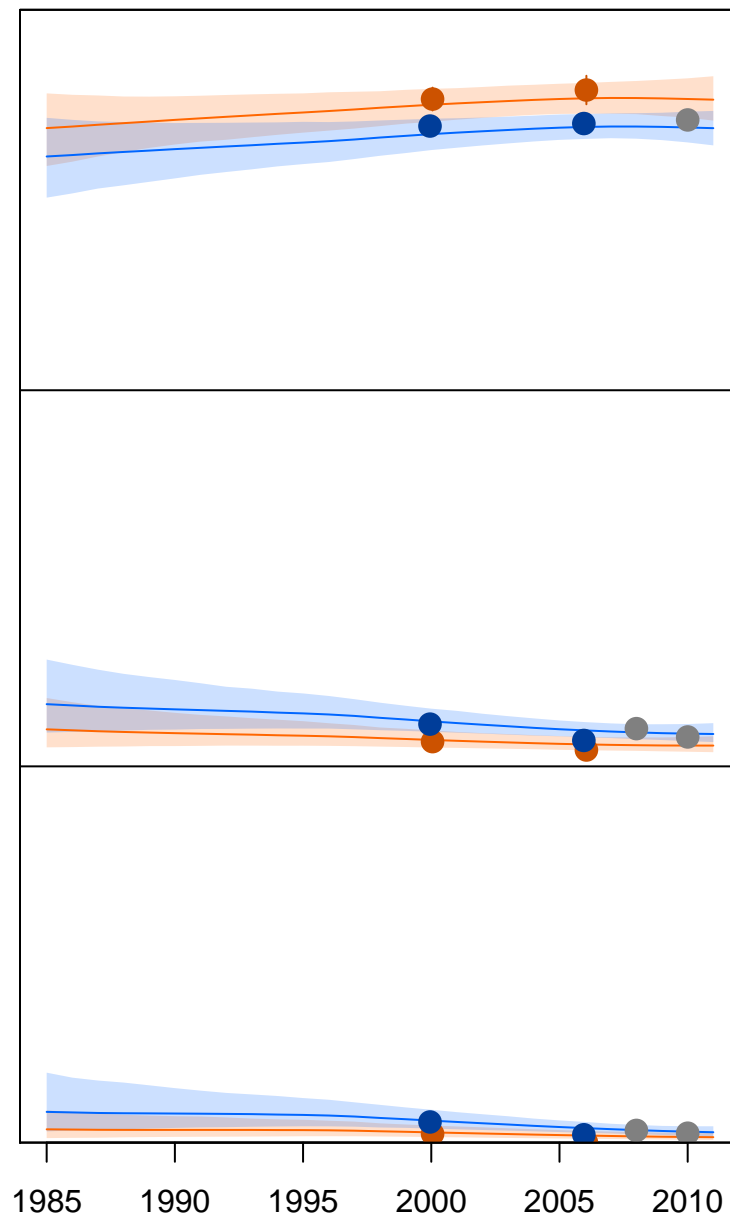

# Syrian Arab Republic

Central Asia, Middle East, and North Africa Region

167

## HAZ

## WAZ

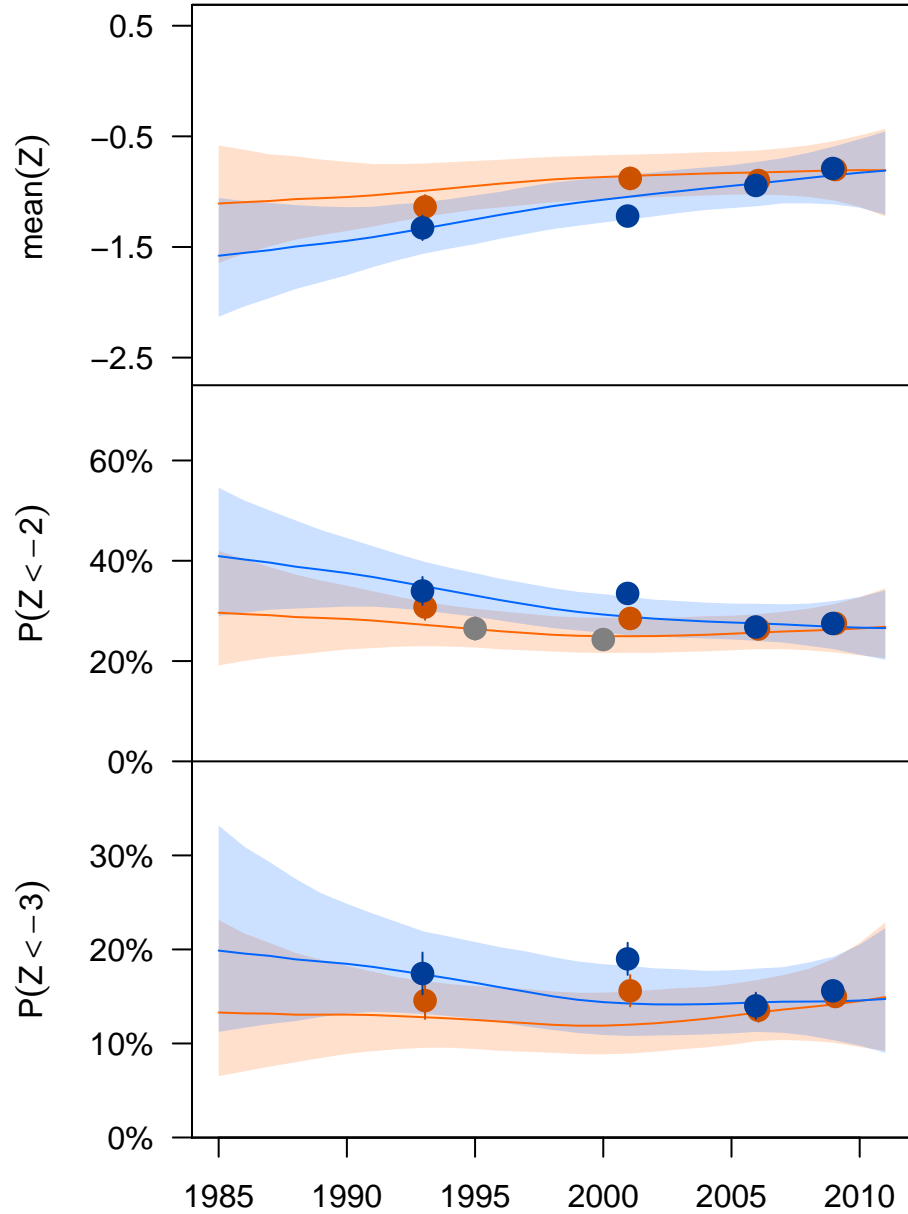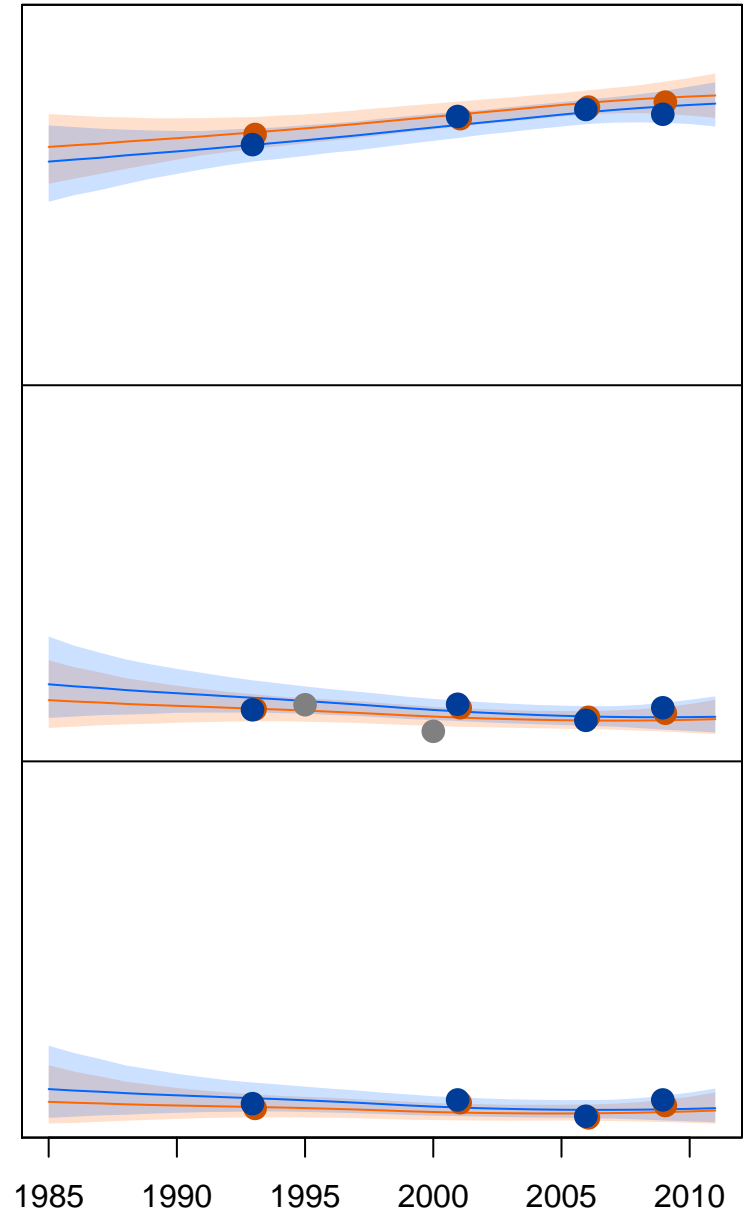



# Taiwan

## East and Southeast Asia Region

### HAZ

### WAZ

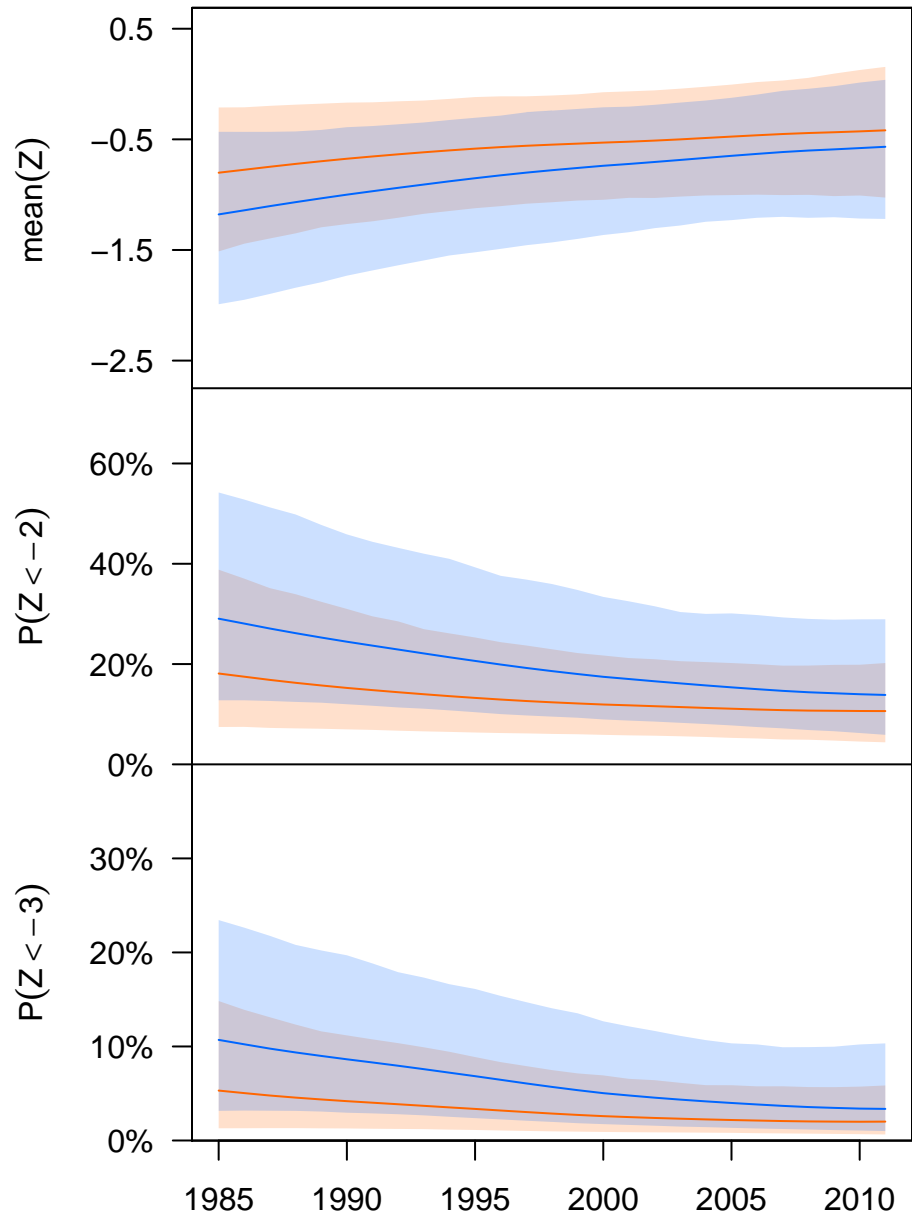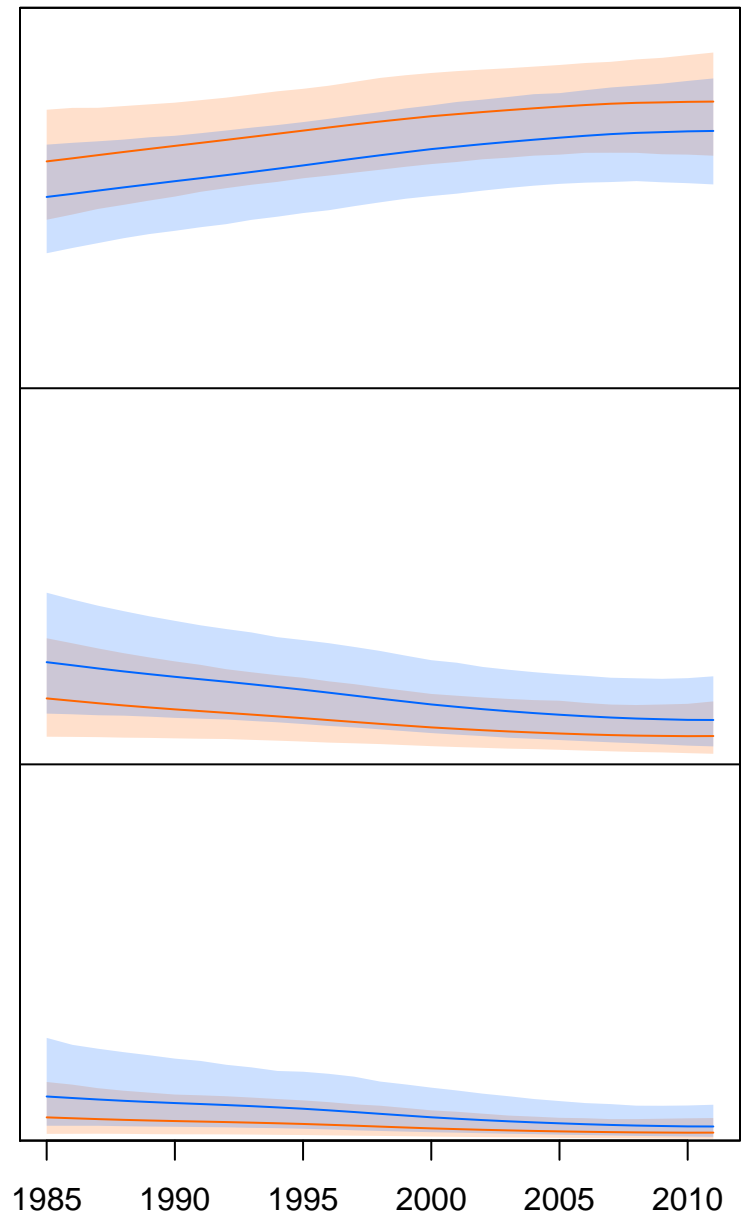

# Tajikistan

Central Asia, Middle East, and North Africa Region

### HAZ

### WAZ

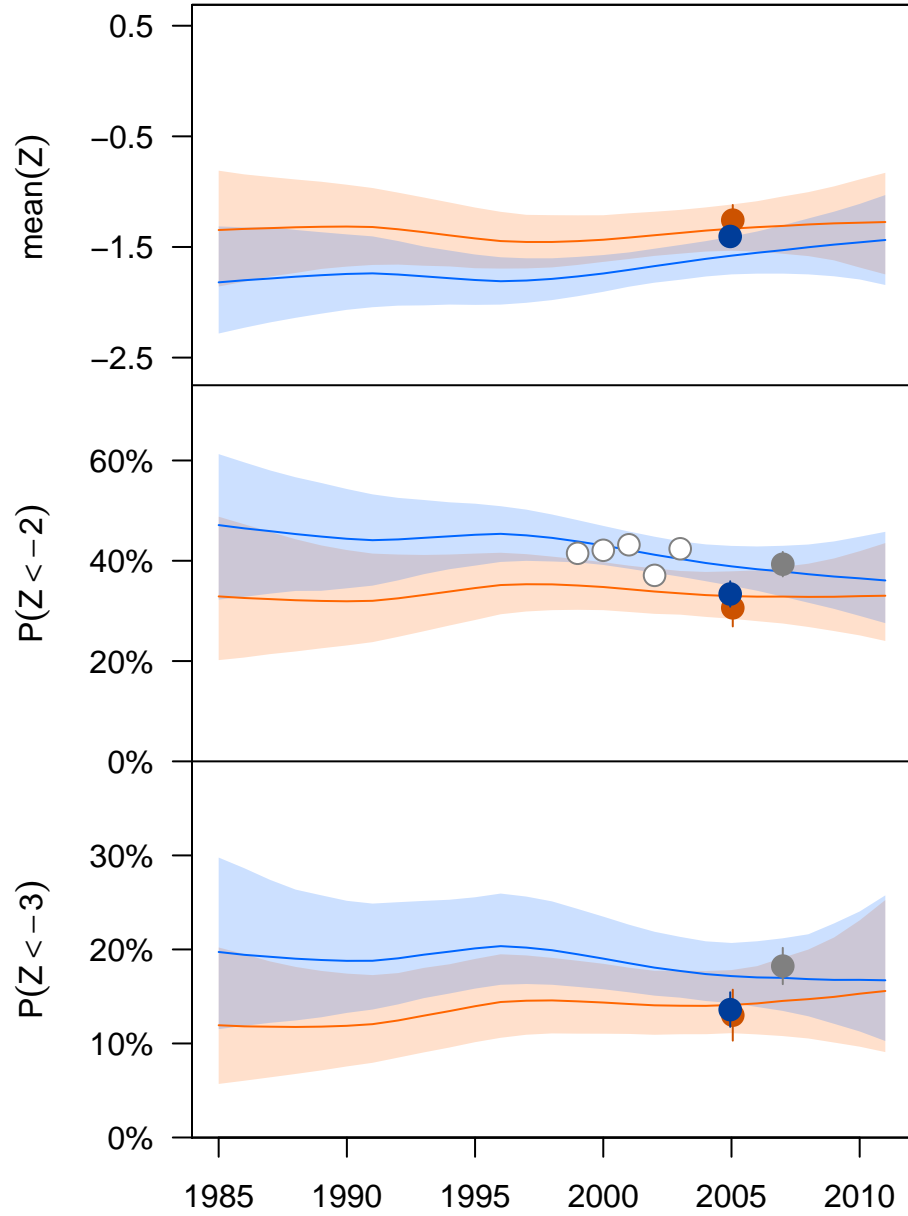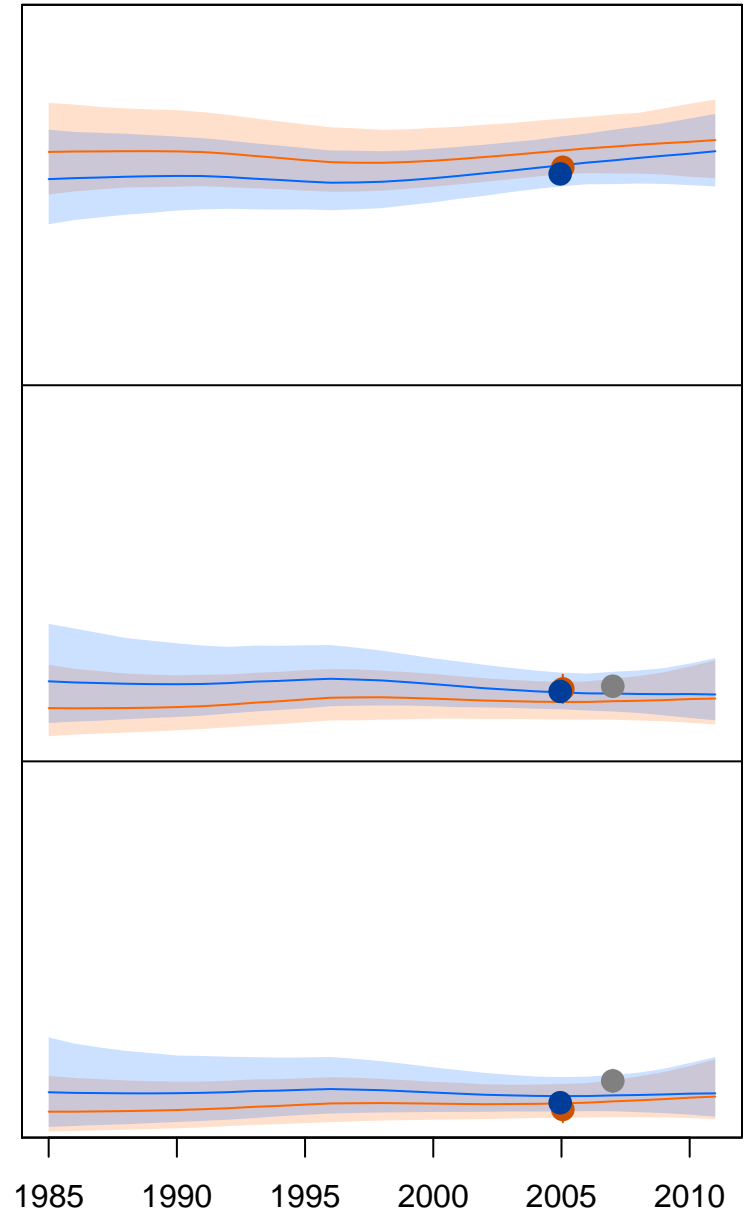

# Thailand

## East and Southeast Asia Region

170

### HAZ

### WAZ

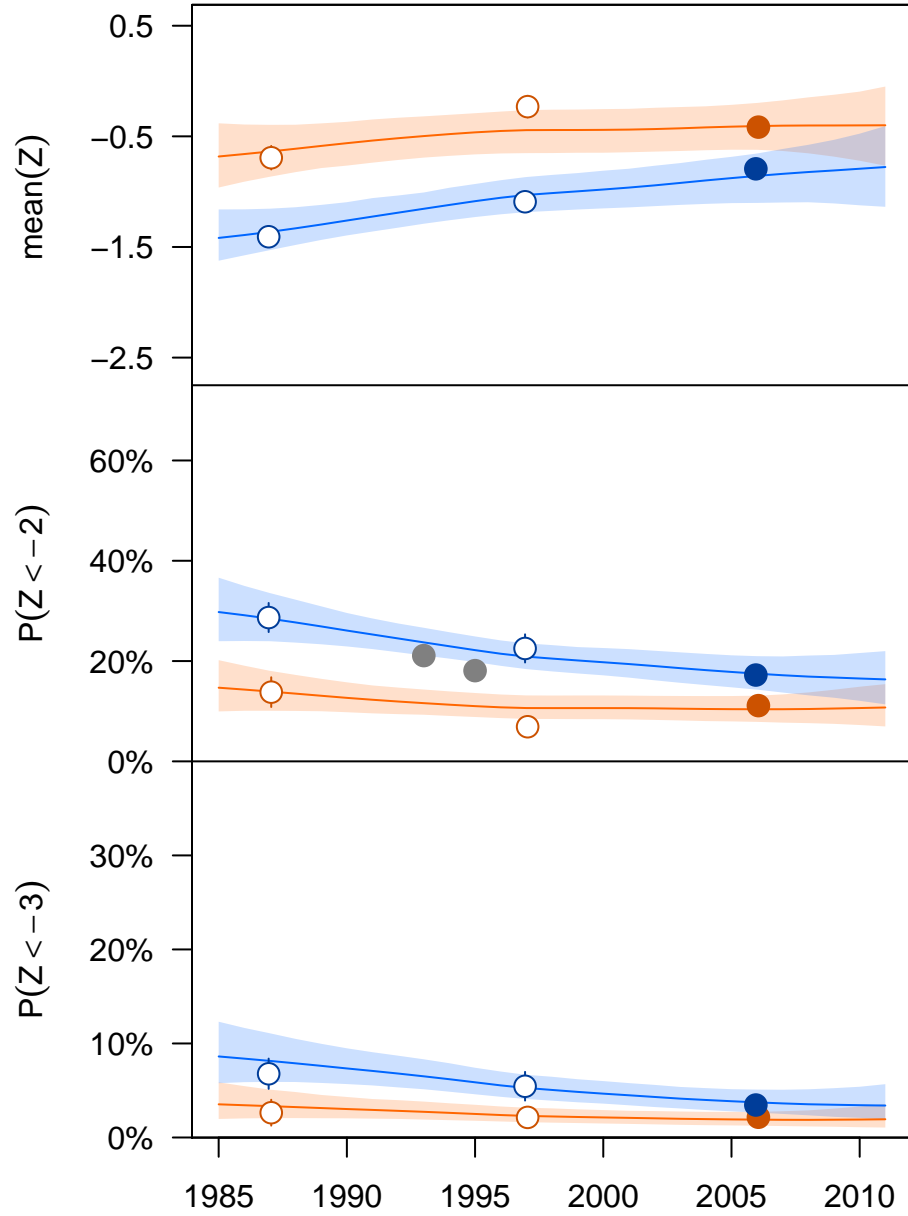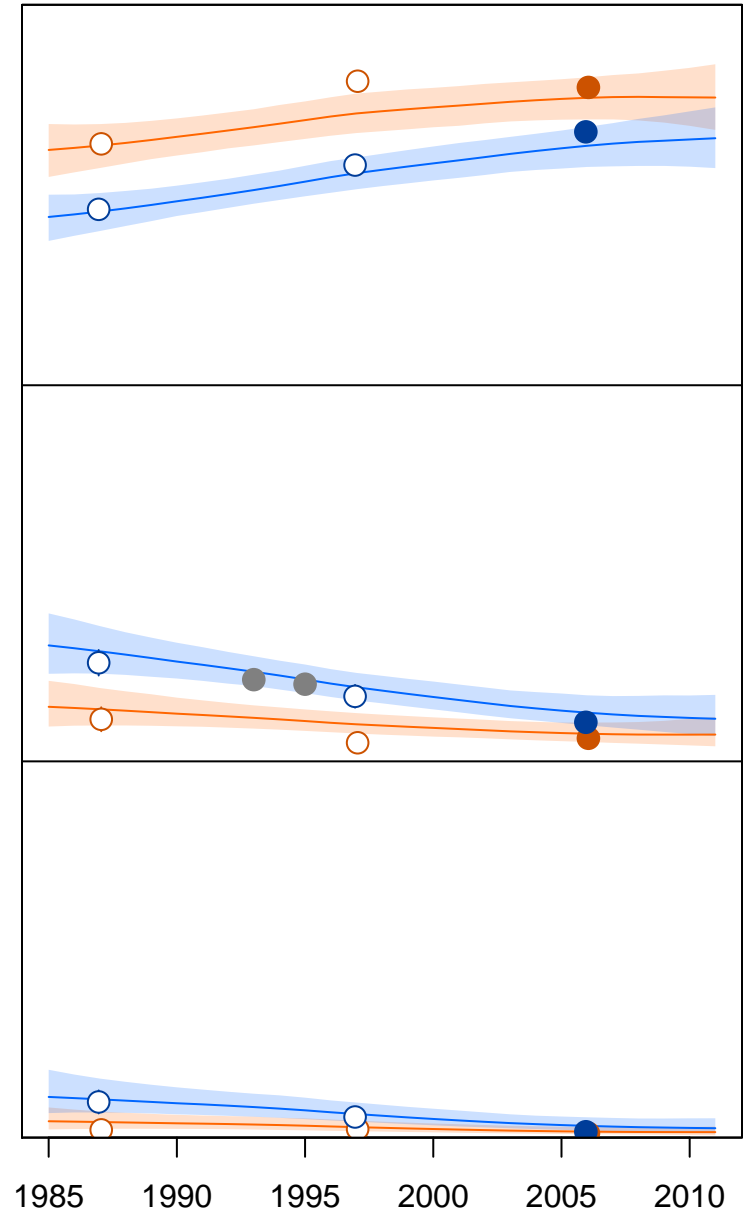

# Timor-Leste

## East and Southeast Asia Region

### HAZ

### WAZ

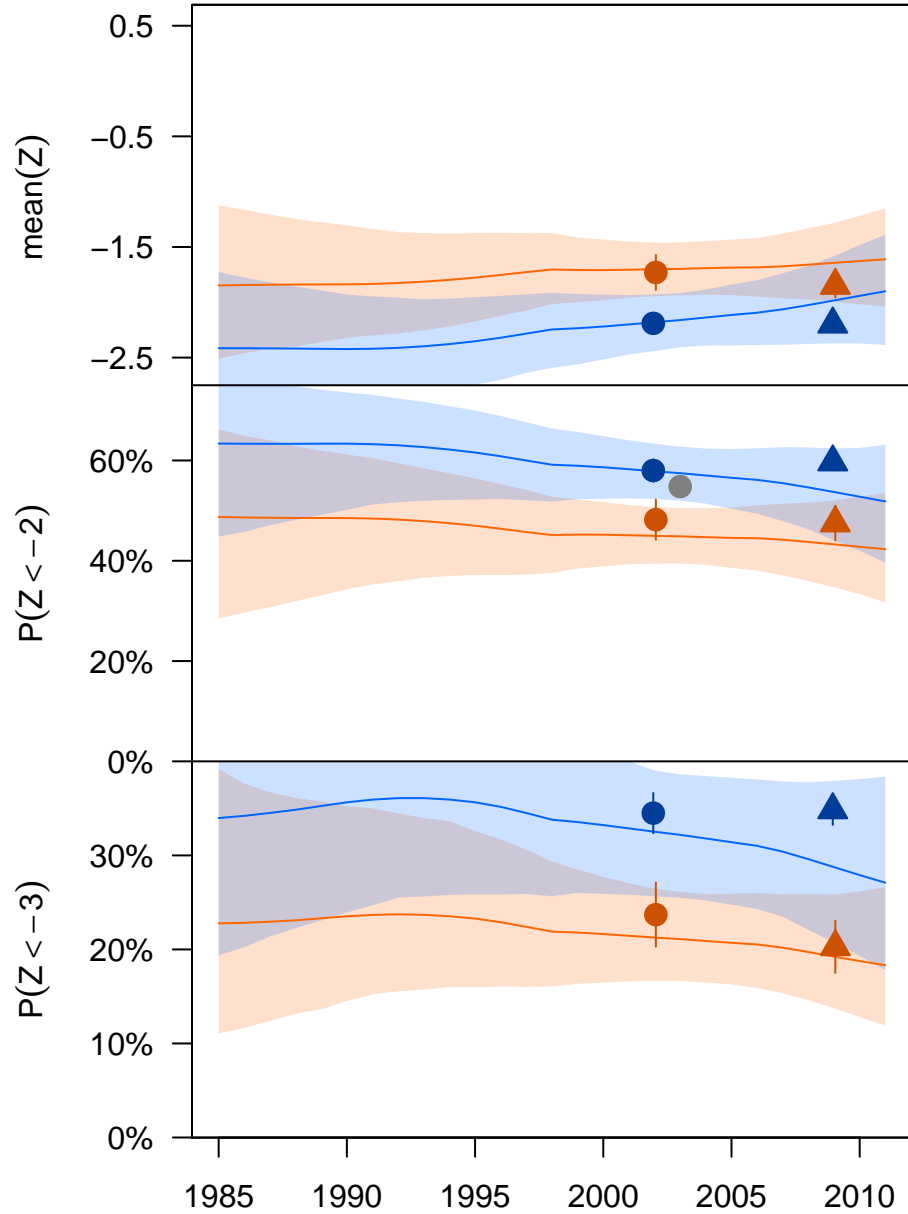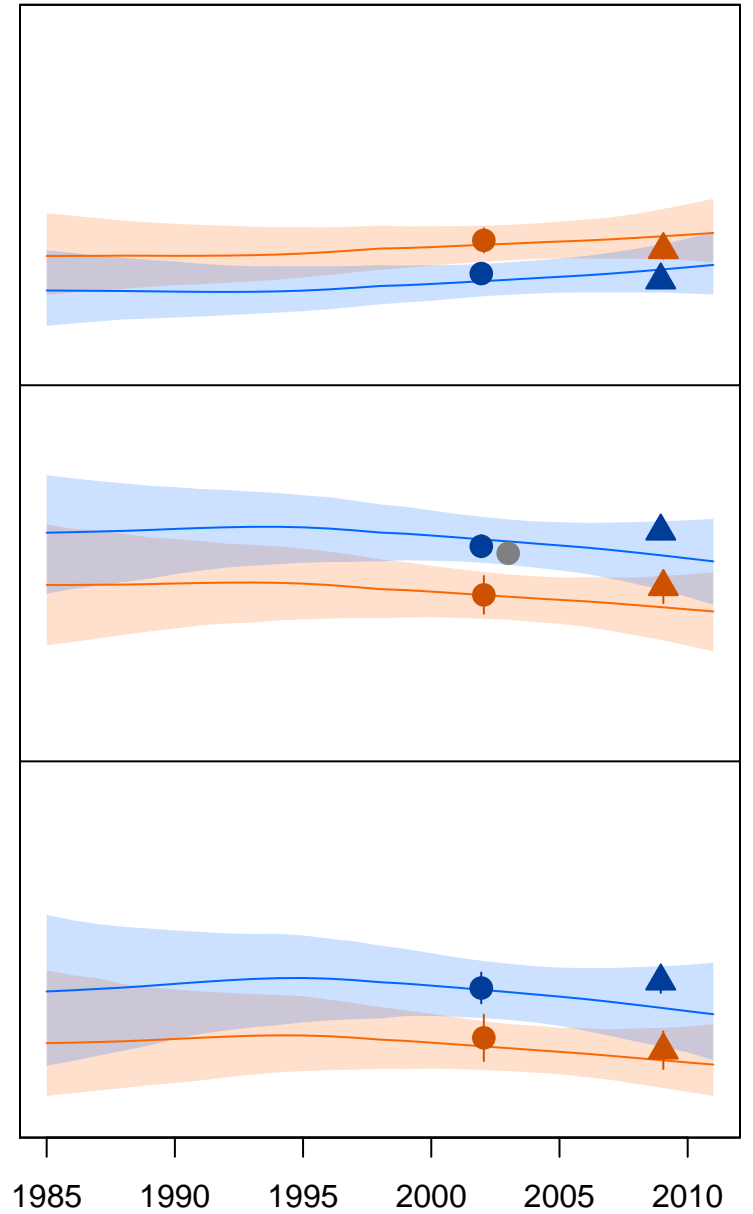

# Togo

## Sub-Saharan Africa Region

172

### HAZ

### WAZ

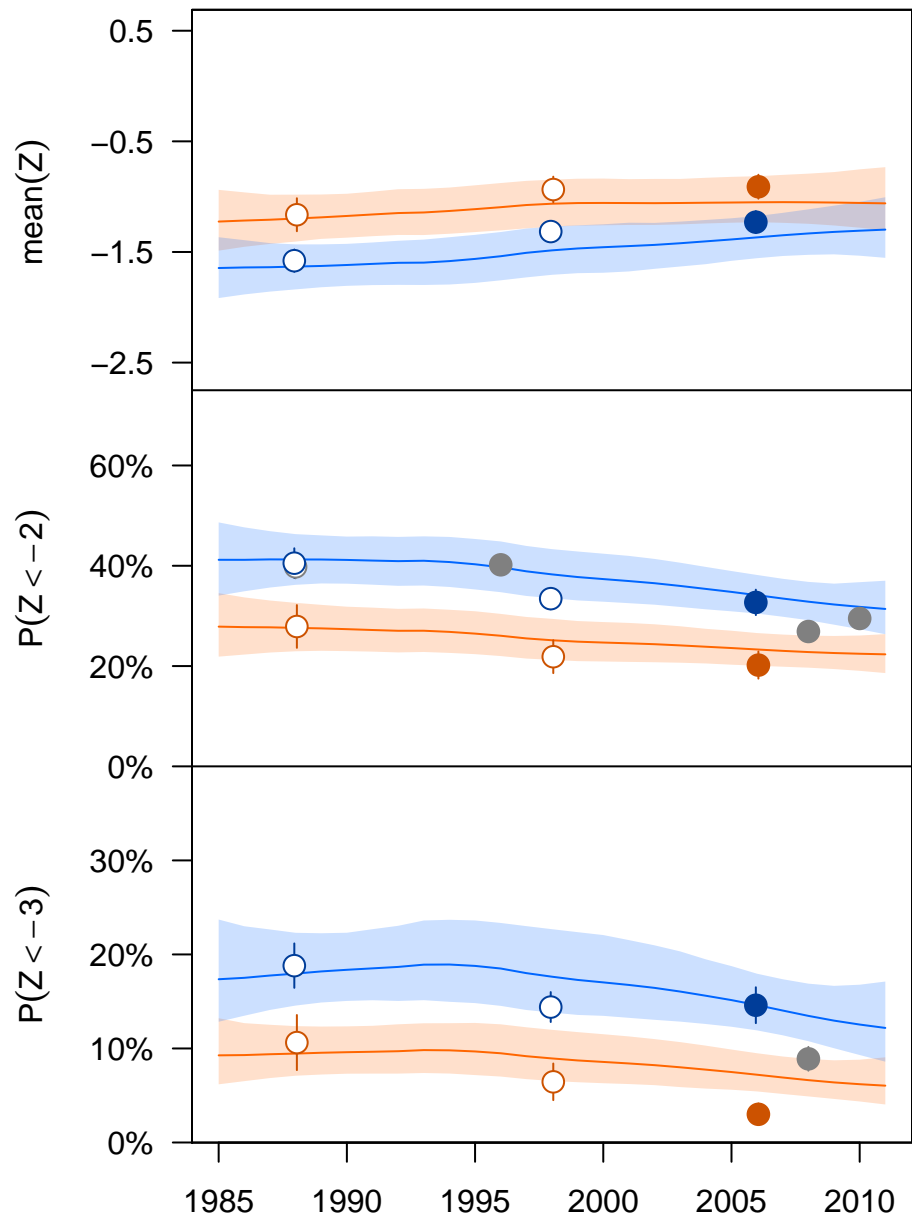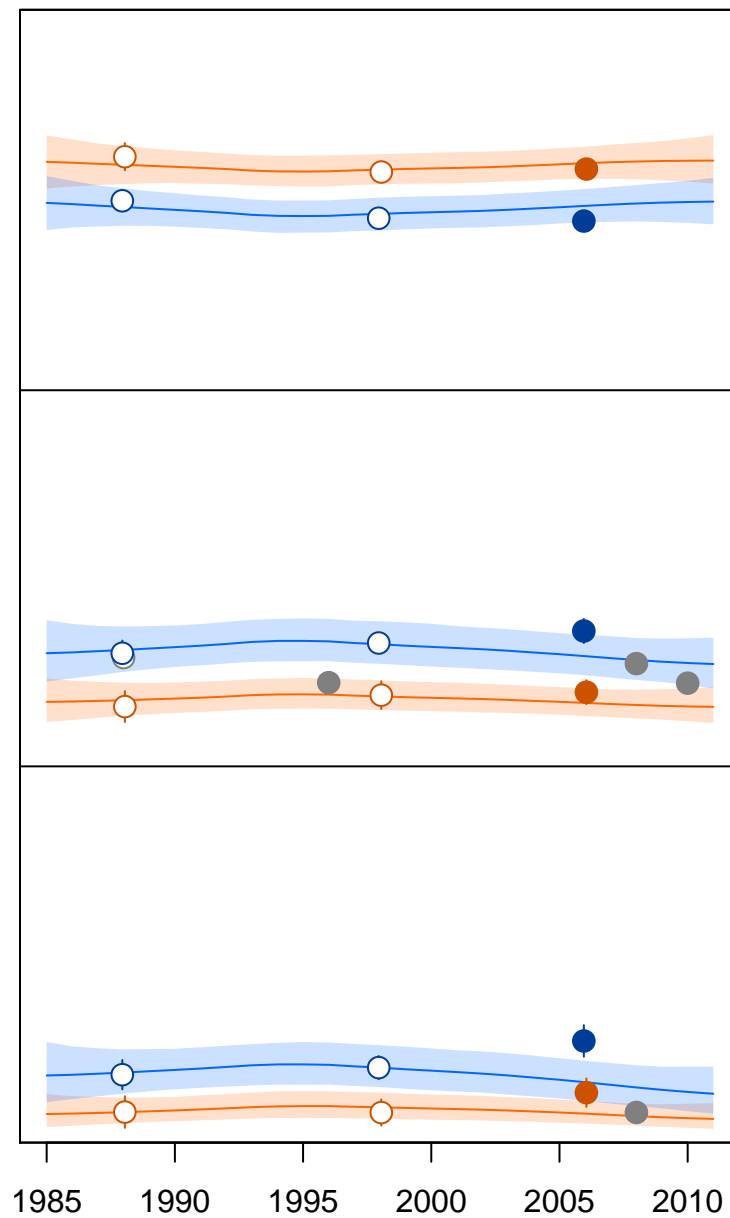

Tonga  
Oceania Region

173

HAZ

WAZ

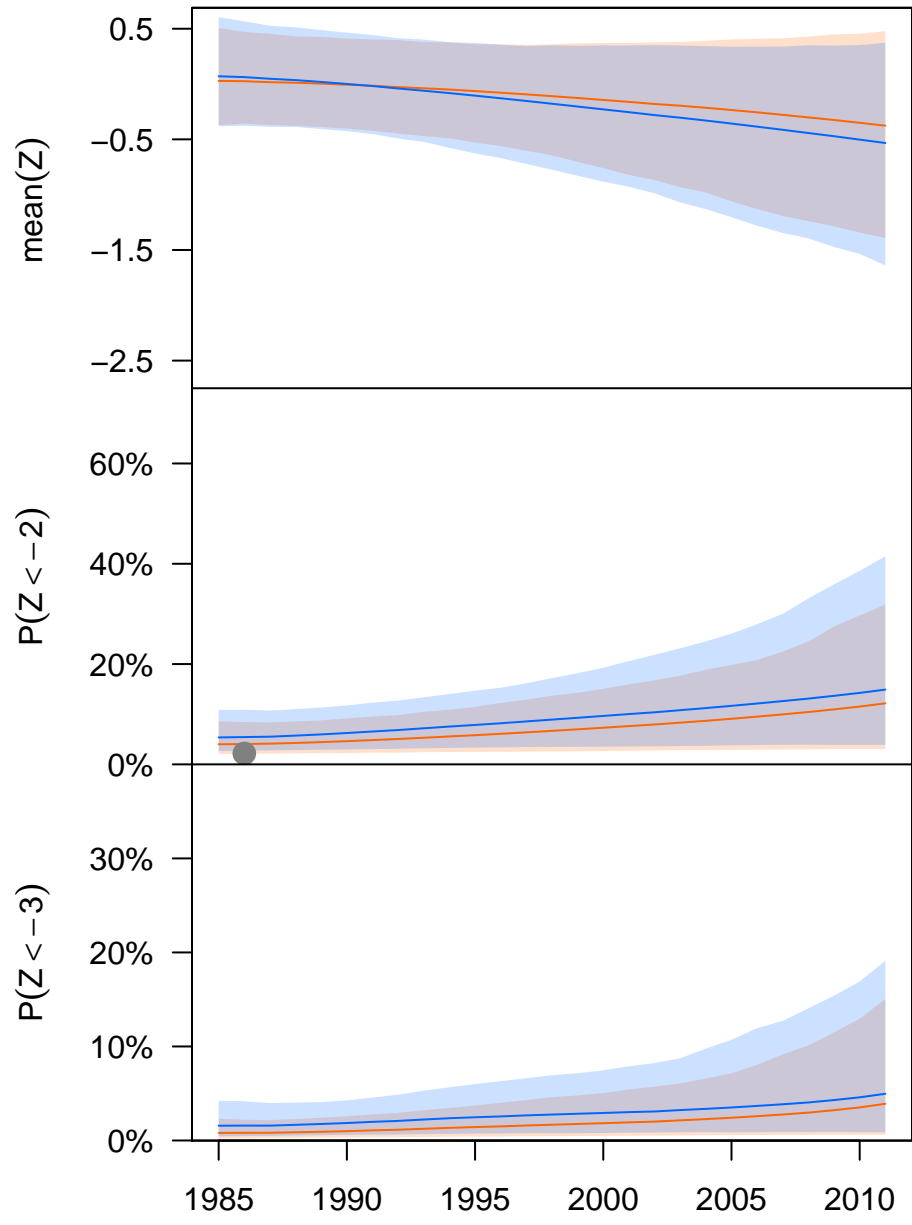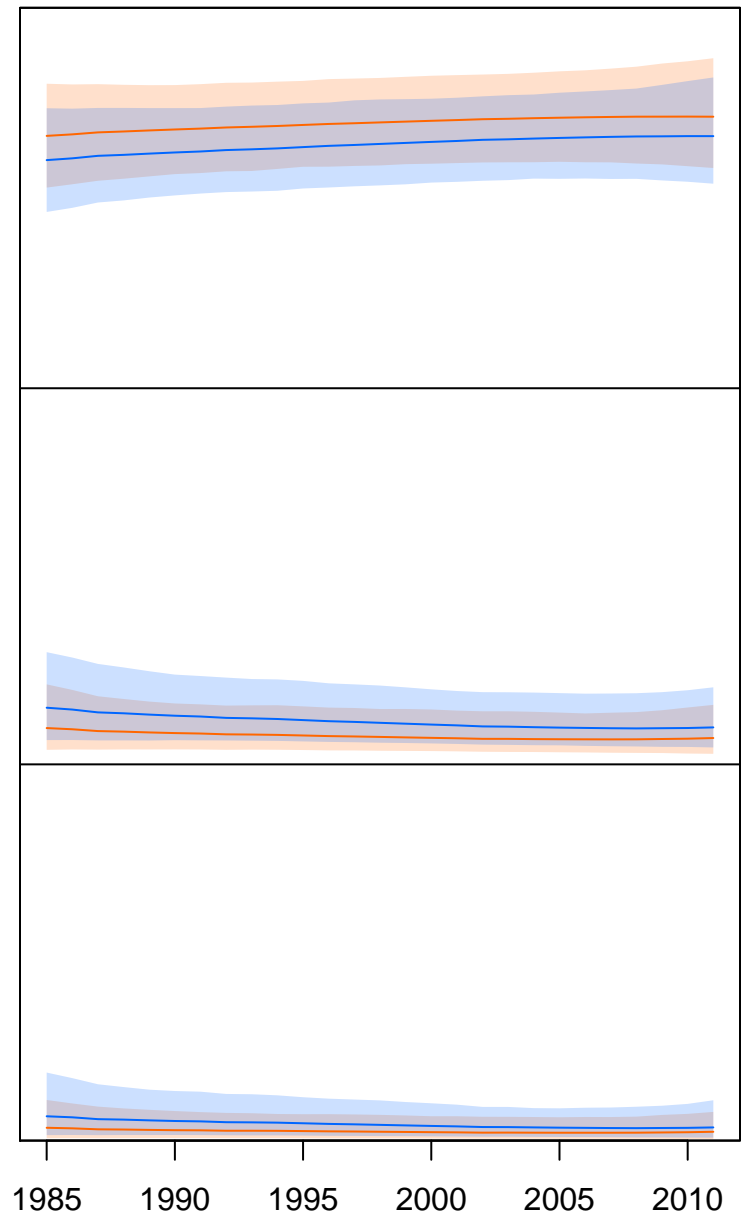

# Trinidad and Tobago

Andean and Central Latin America and Caribbean Region

### HAZ

### WAZ

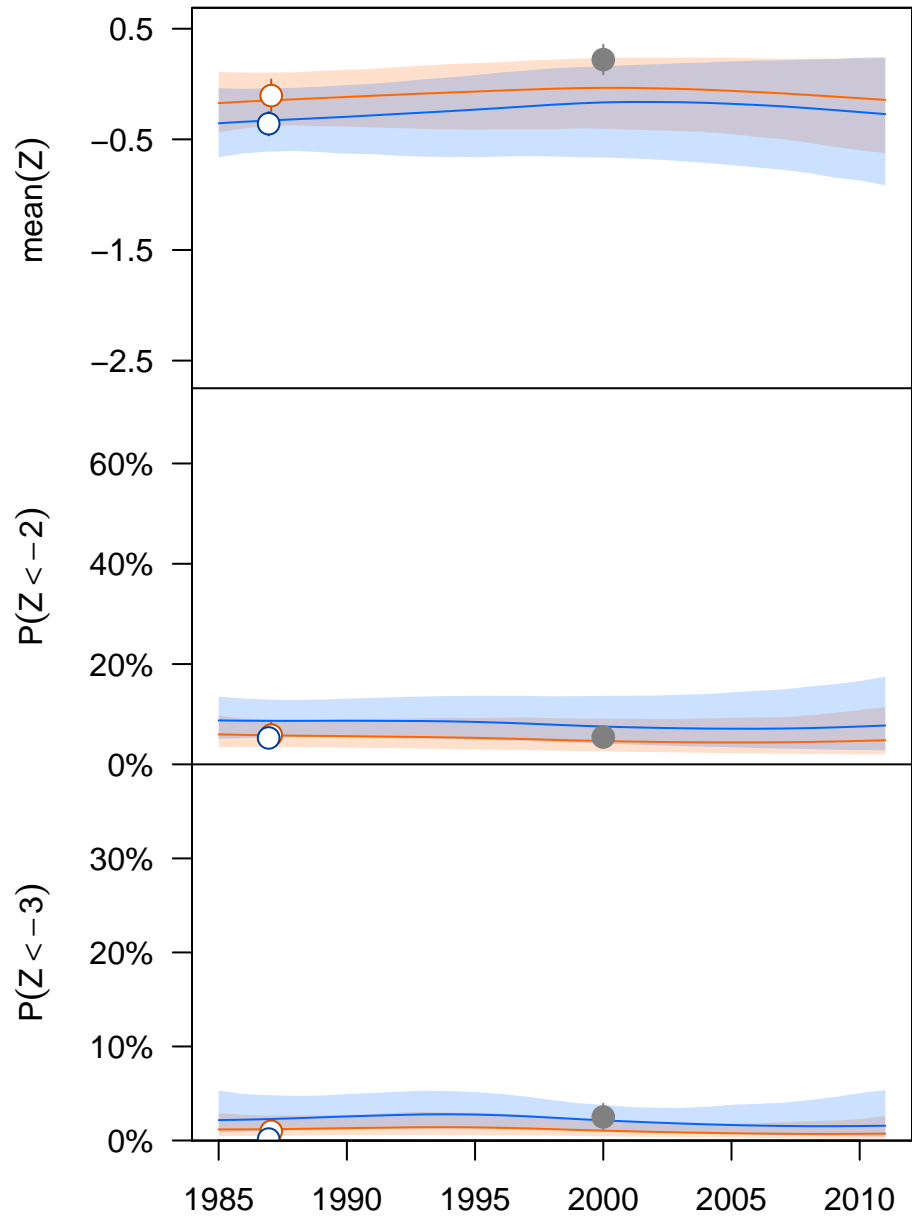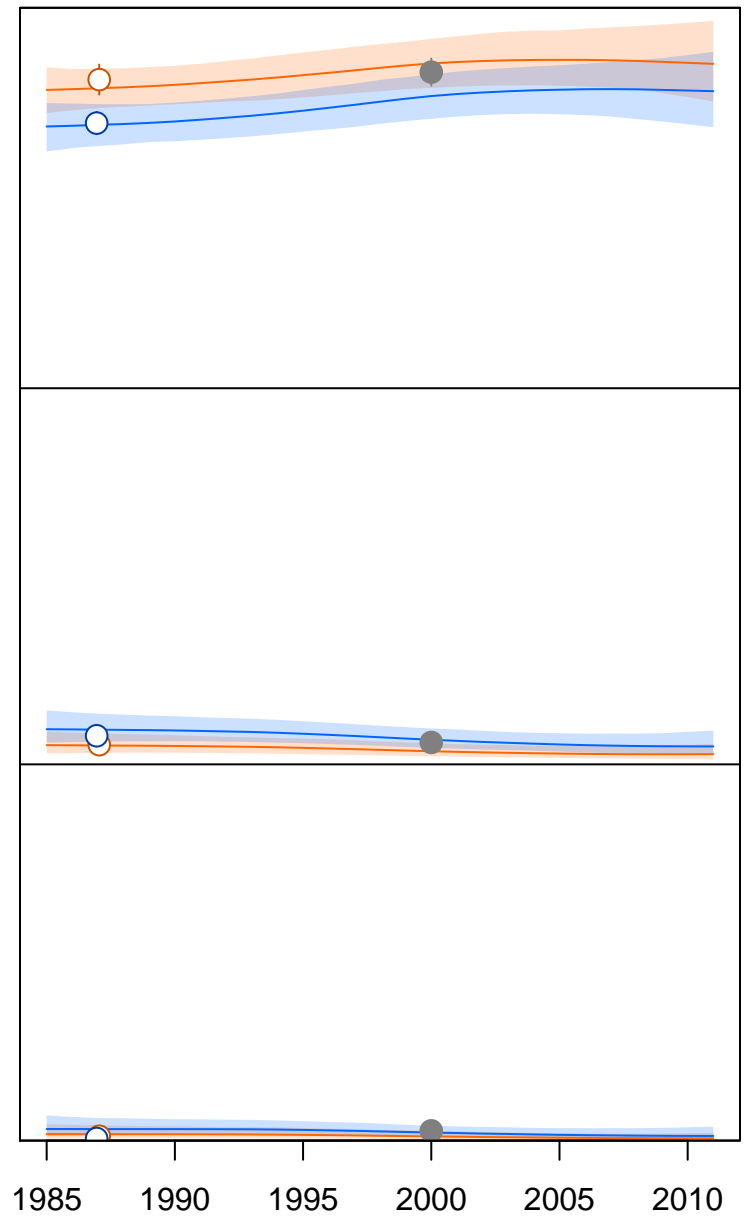

# Tunisia

## Central Asia, Middle East, and North Africa Region

175

### HAZ

### WAZ

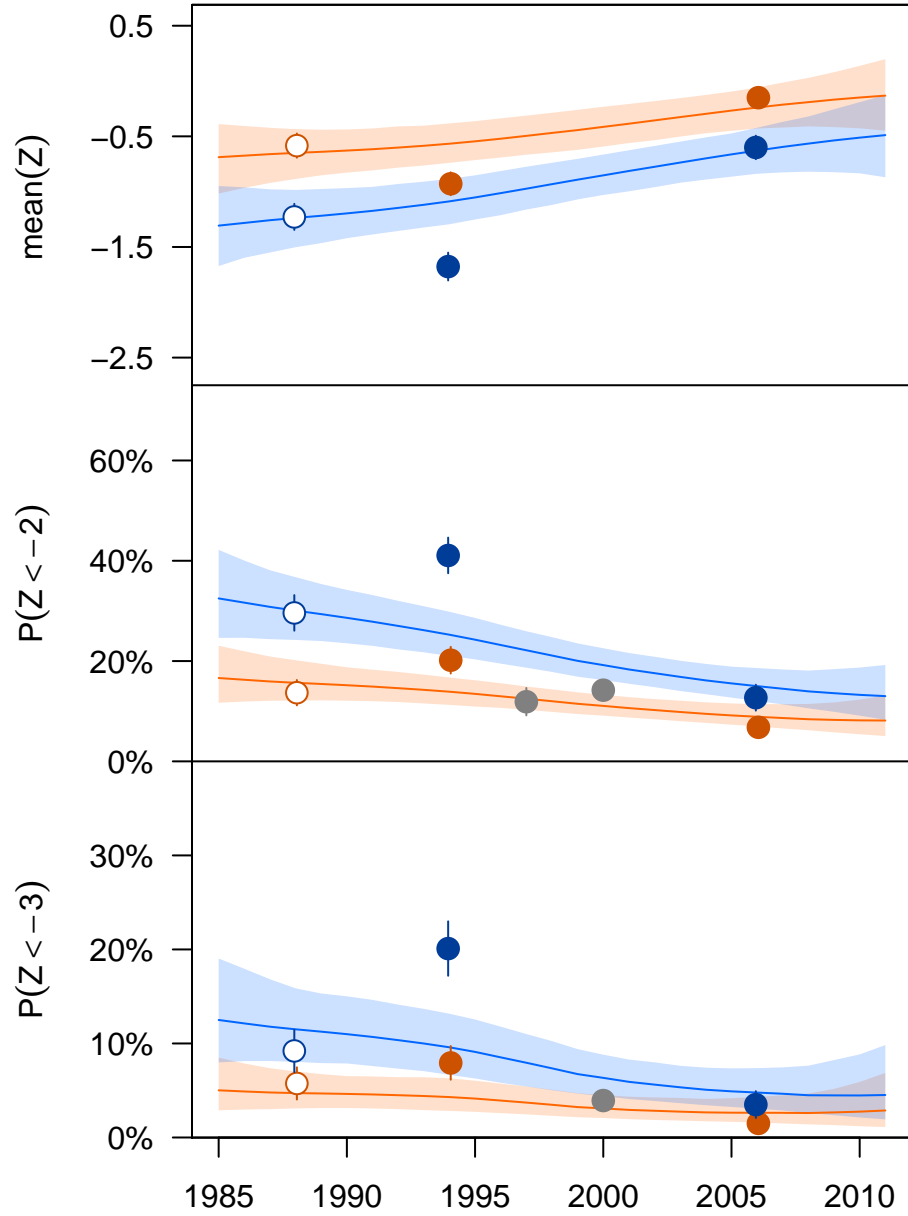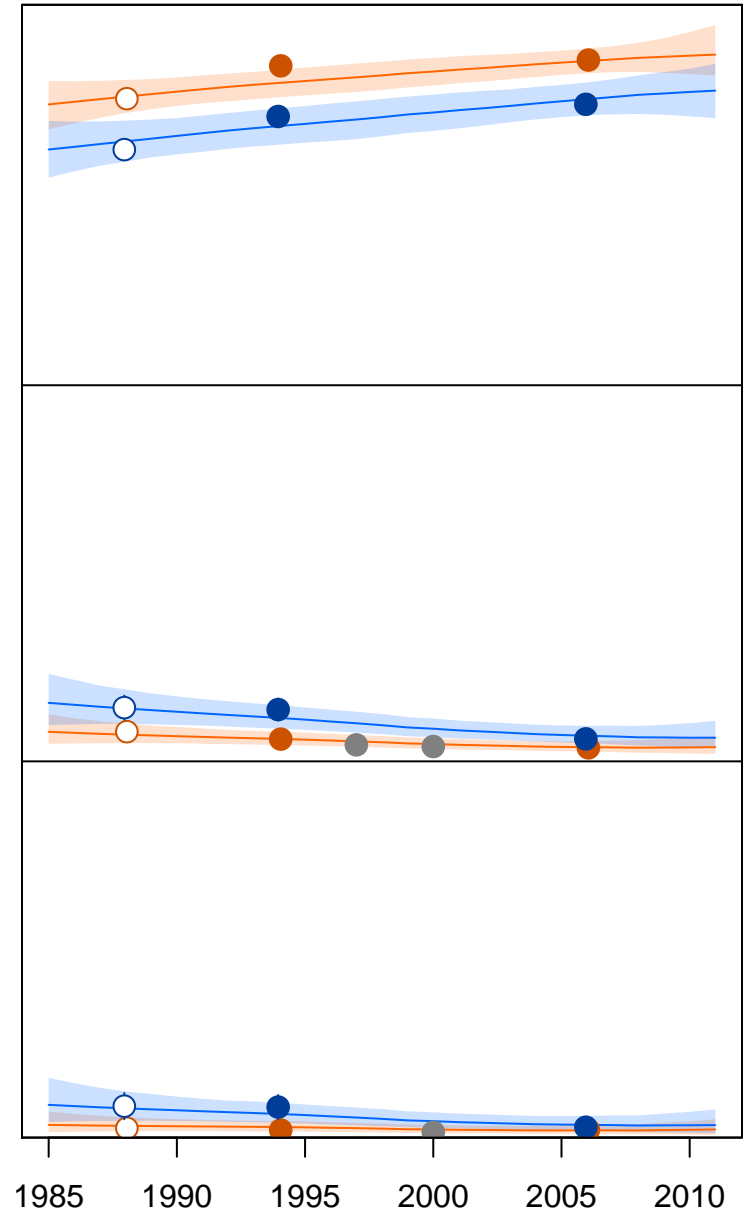



# Turkey

## Central Asia, Middle East, and North Africa Region

**HAZ**

**WAZ**

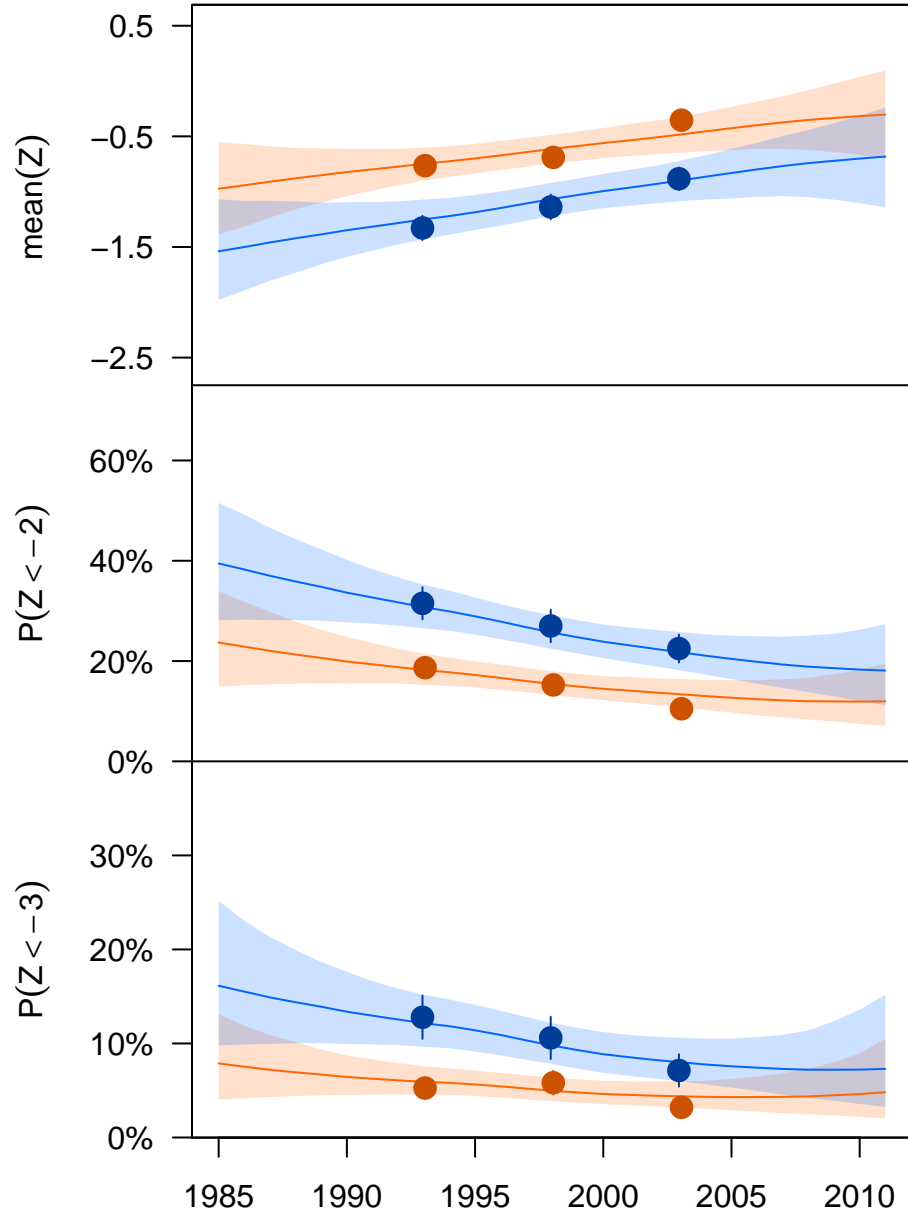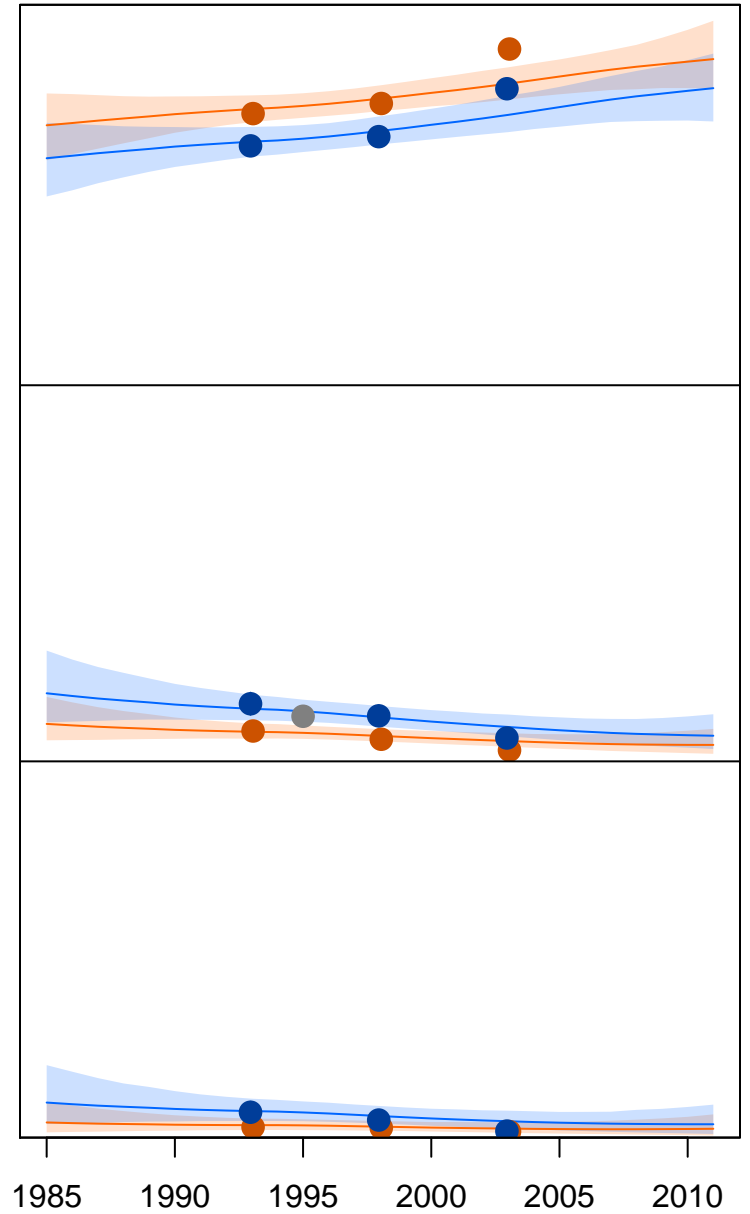

# Turkmenistan

Central Asia, Middle East, and North Africa Region

### HAZ

### WAZ

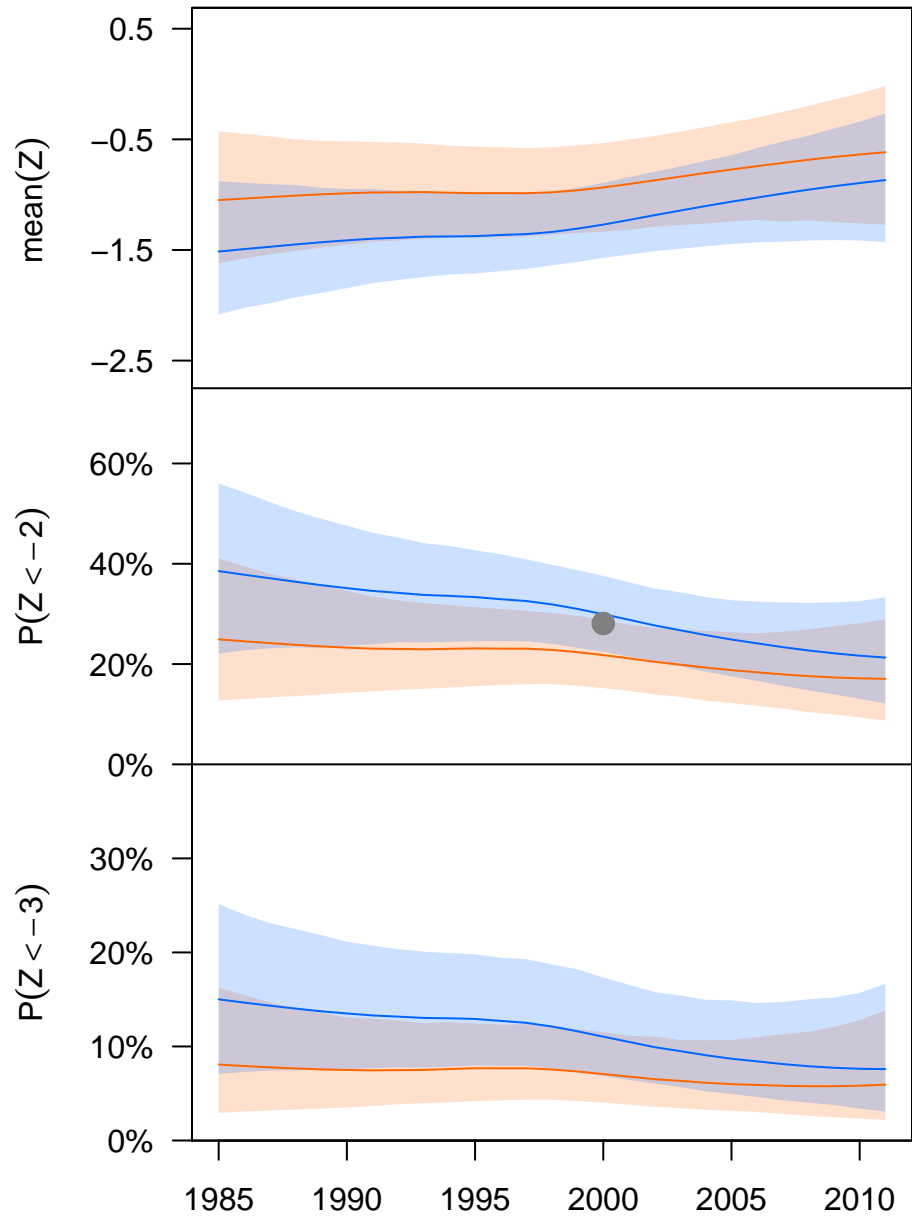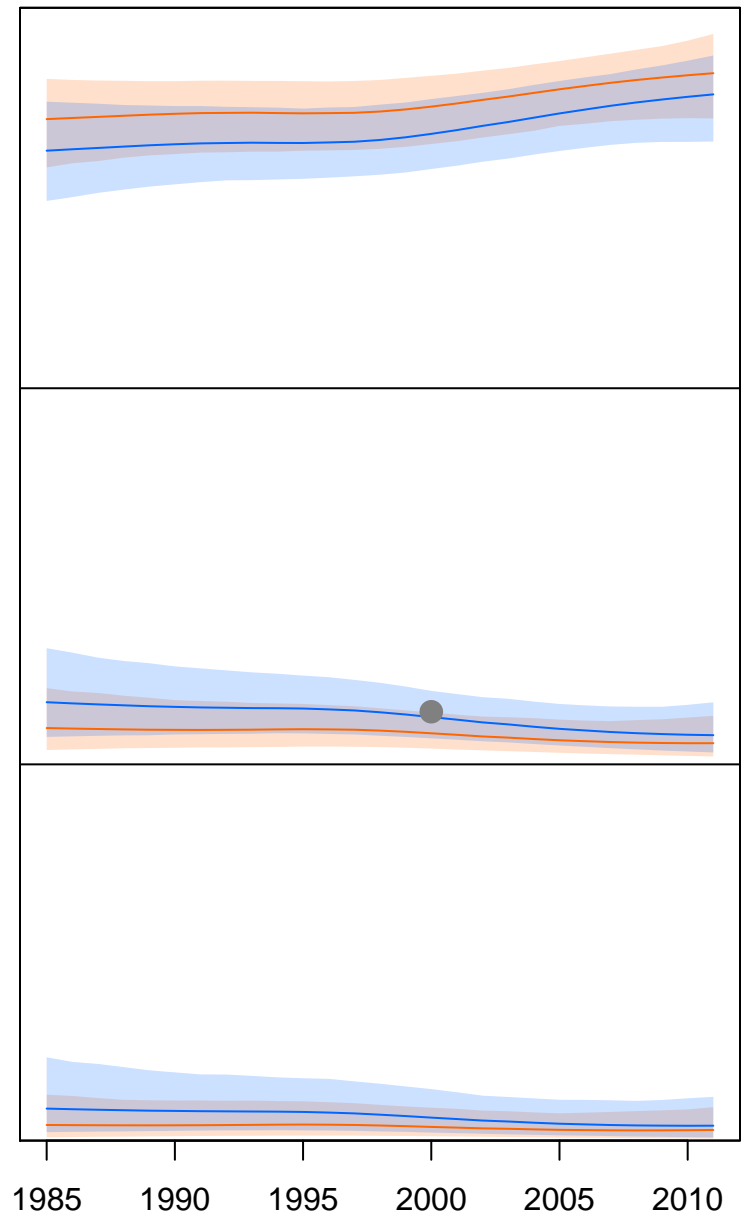

# Uganda

## Sub-Saharan Africa Region

178

### HAZ

### WAZ

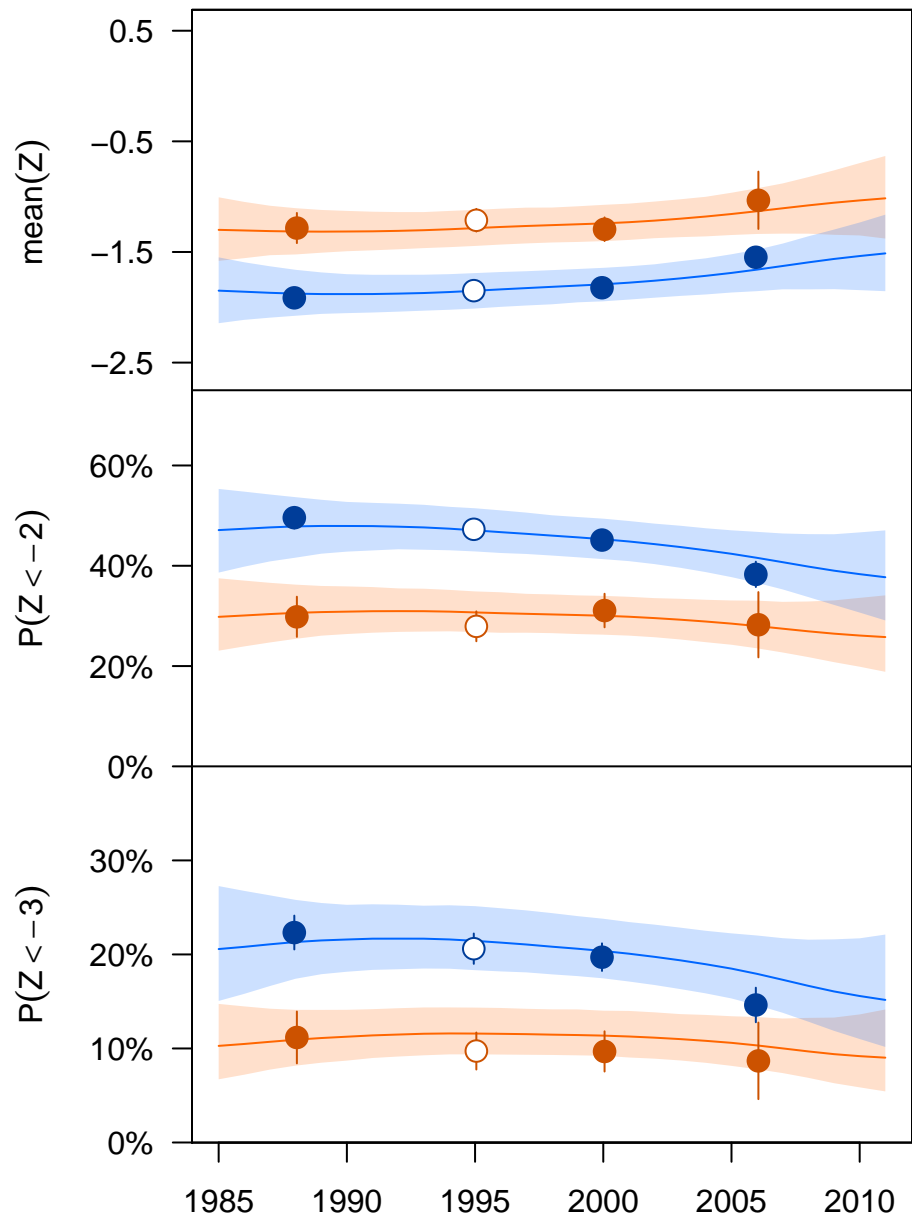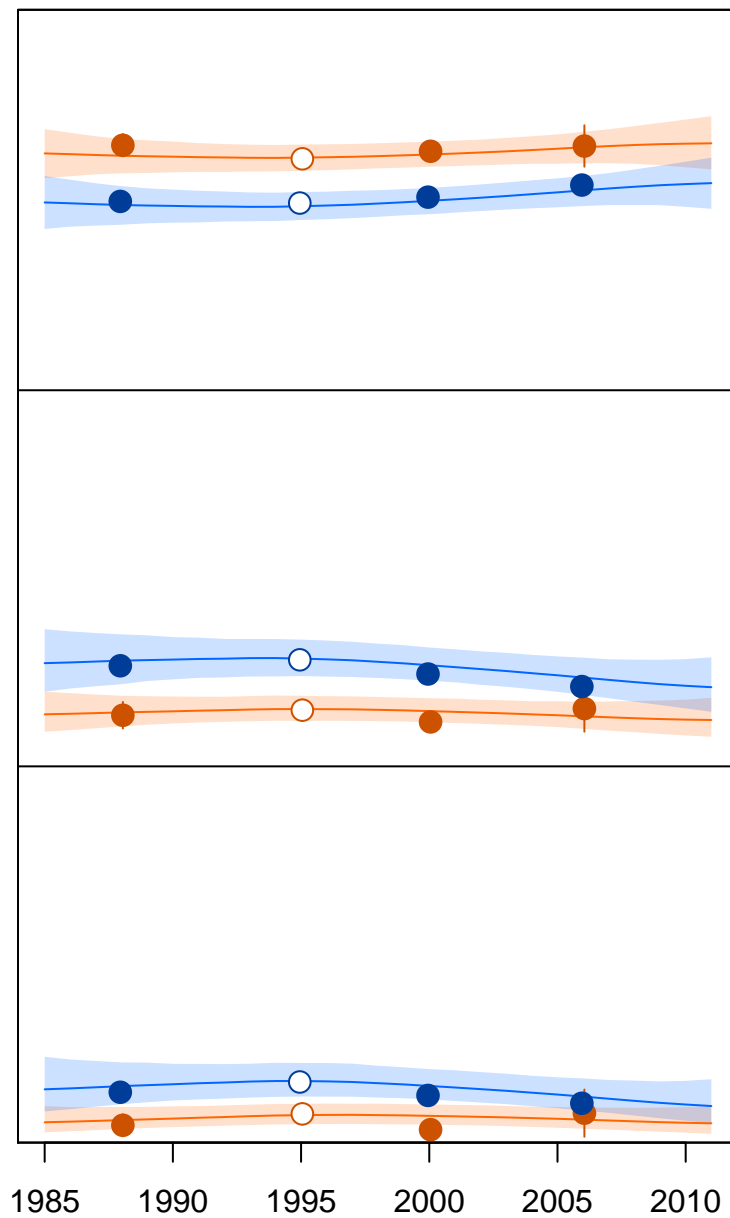

# United Arab Emirates

Central Asia, Middle East, and North Africa Region

### HAZ

### WAZ

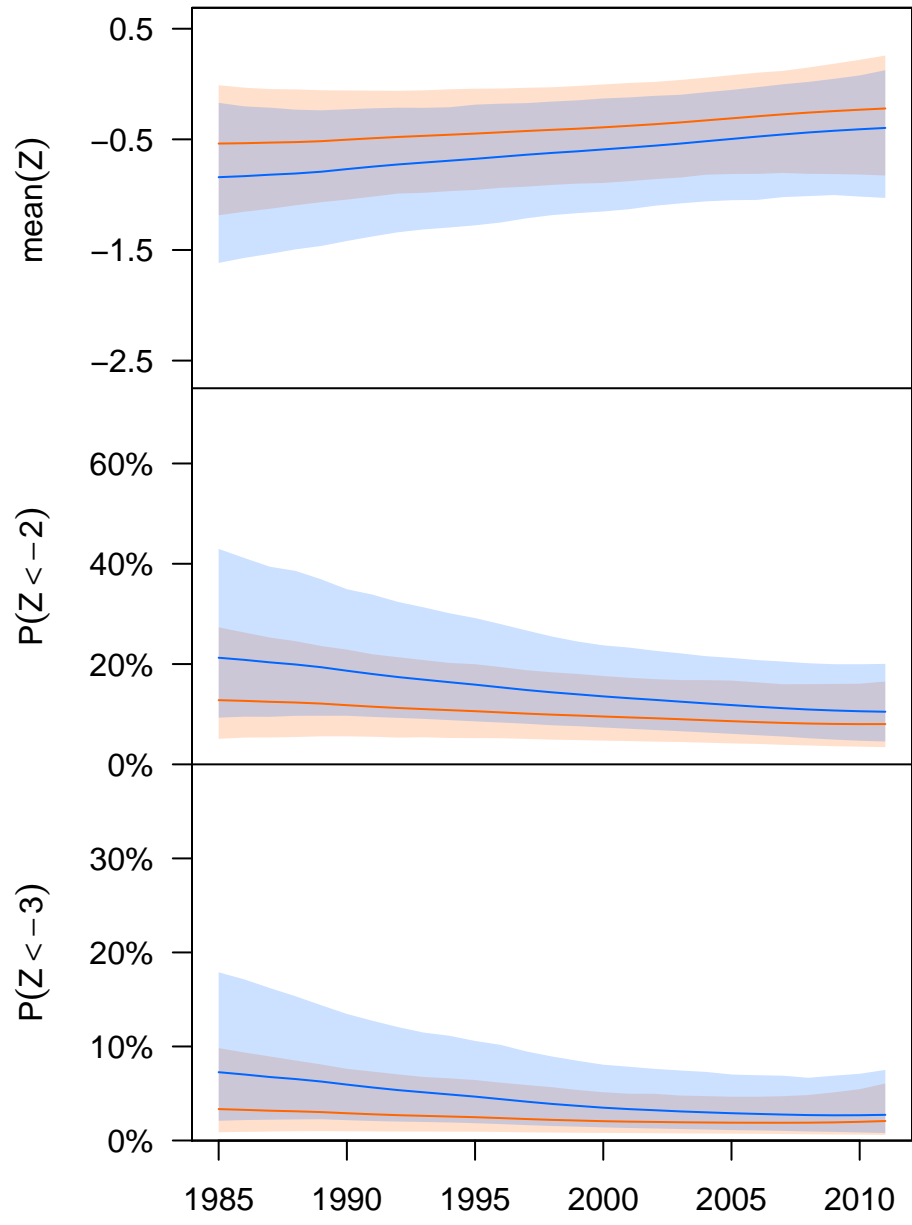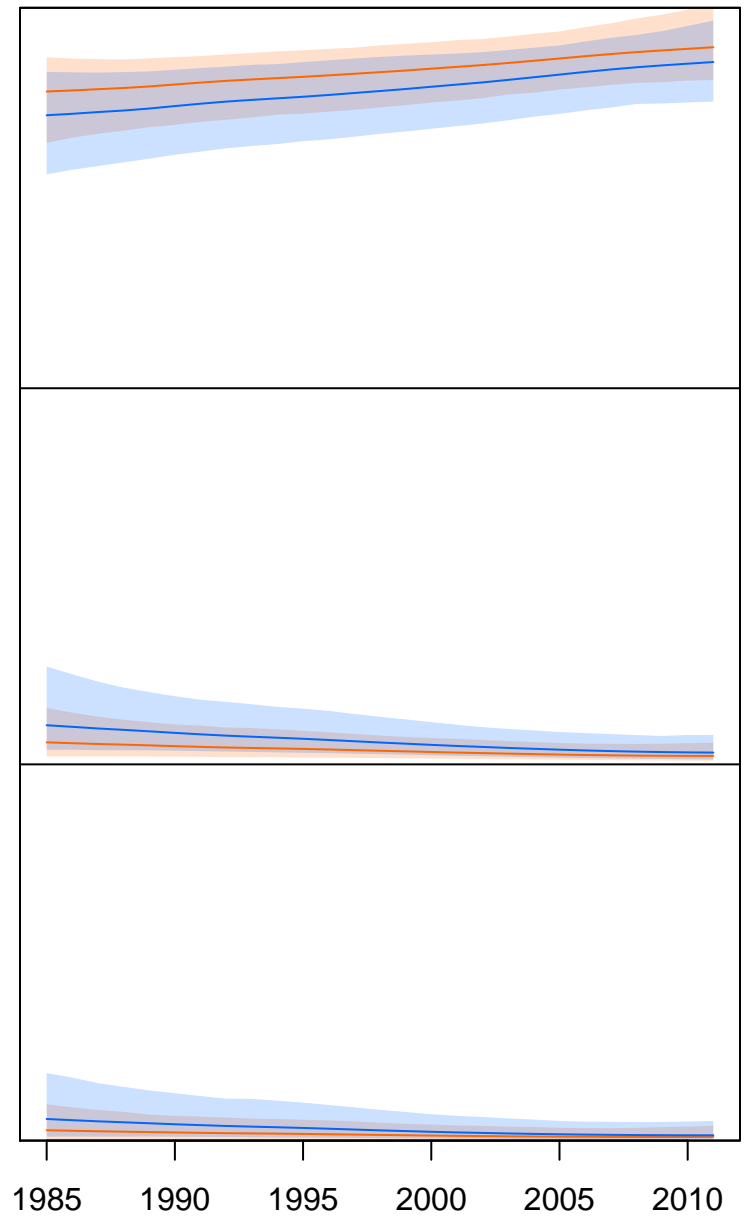

# United Republic of Tanzania

## Sub-Saharan Africa Region

180

### HAZ

### WAZ

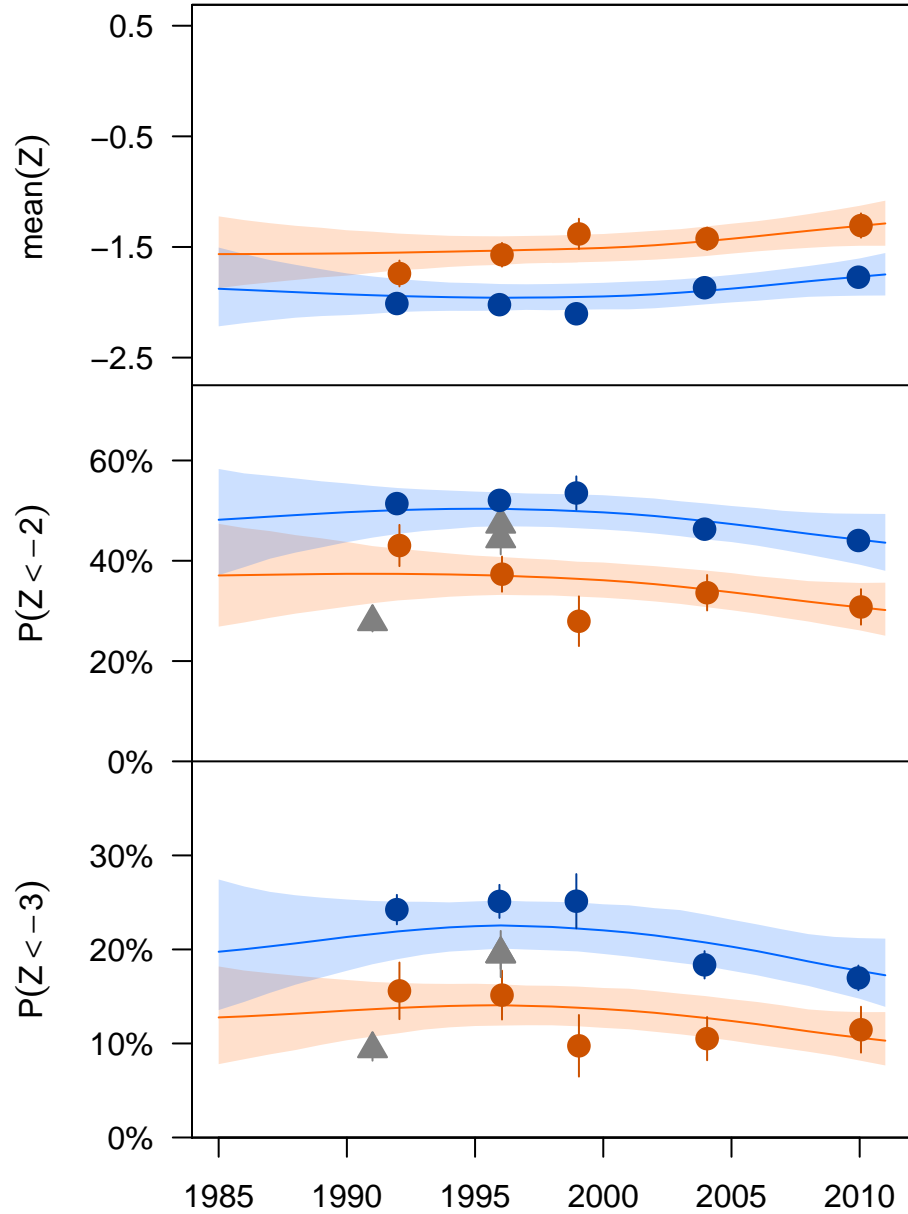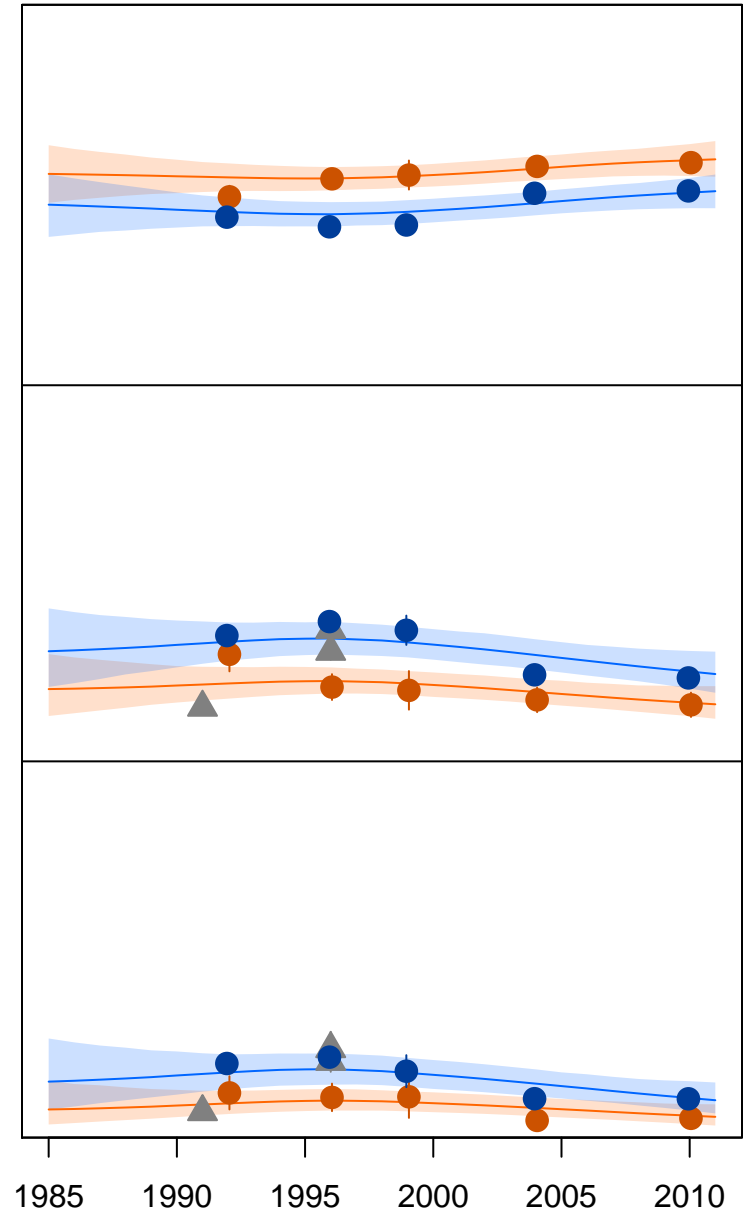

# Uruguay

Southern and Tropical Latin America Region

## HAZ

## WAZ

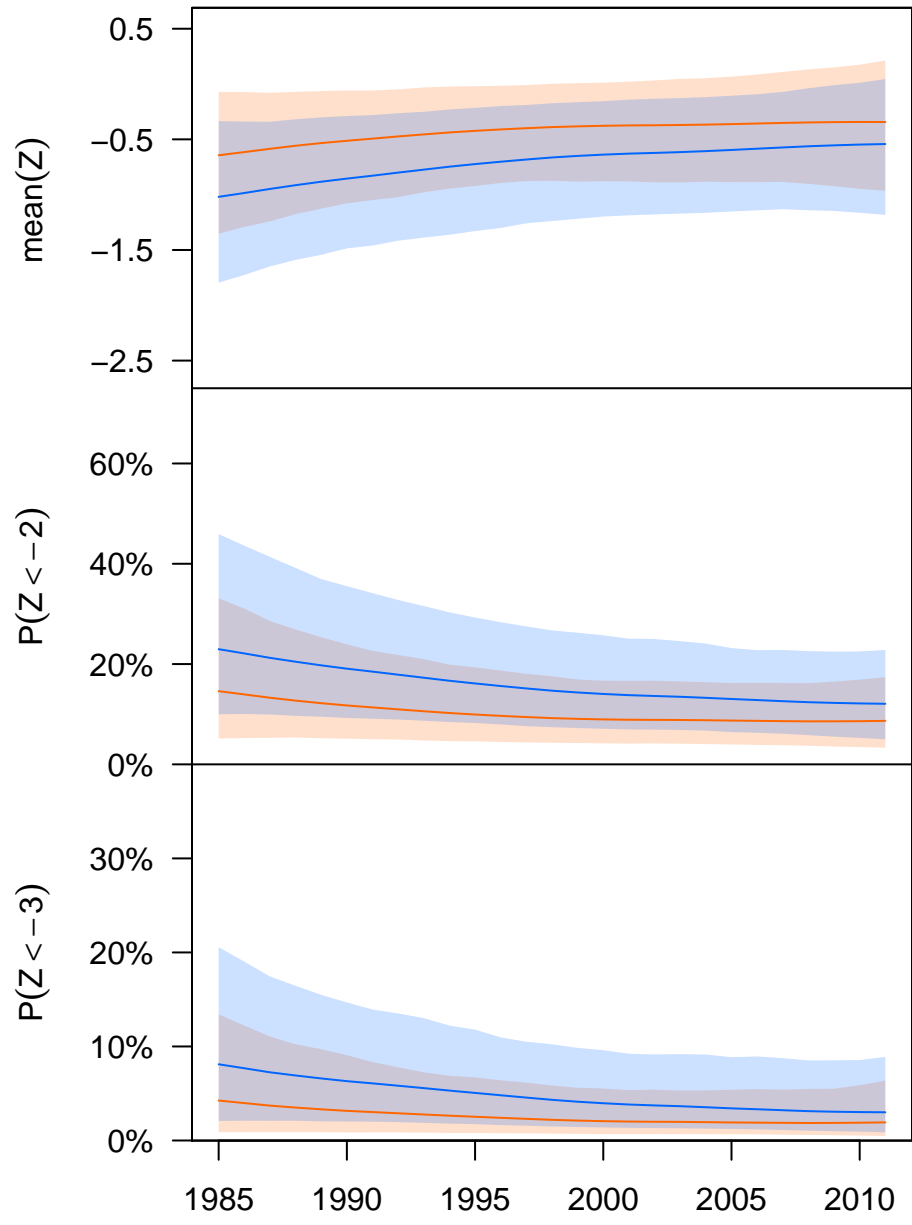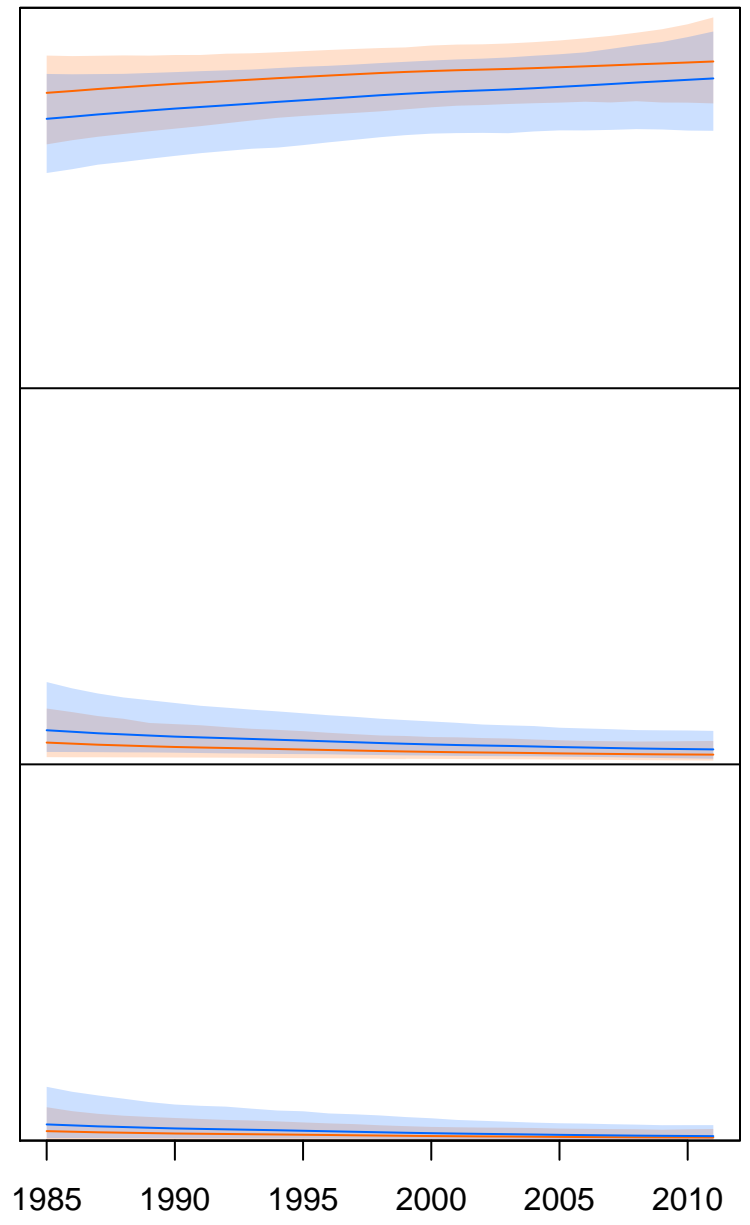

# Uzbekistan

Central Asia, Middle East, and North Africa Region

### HAZ

### WAZ

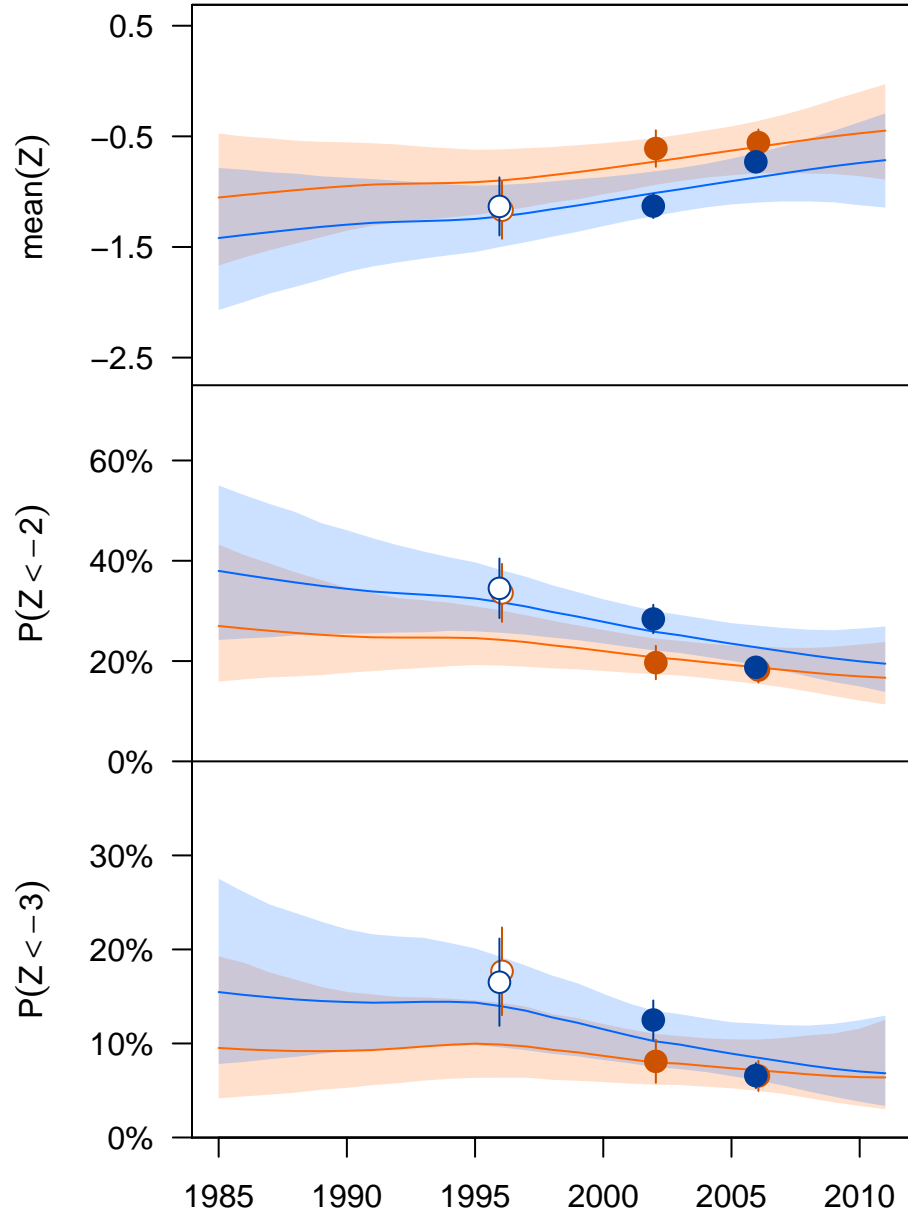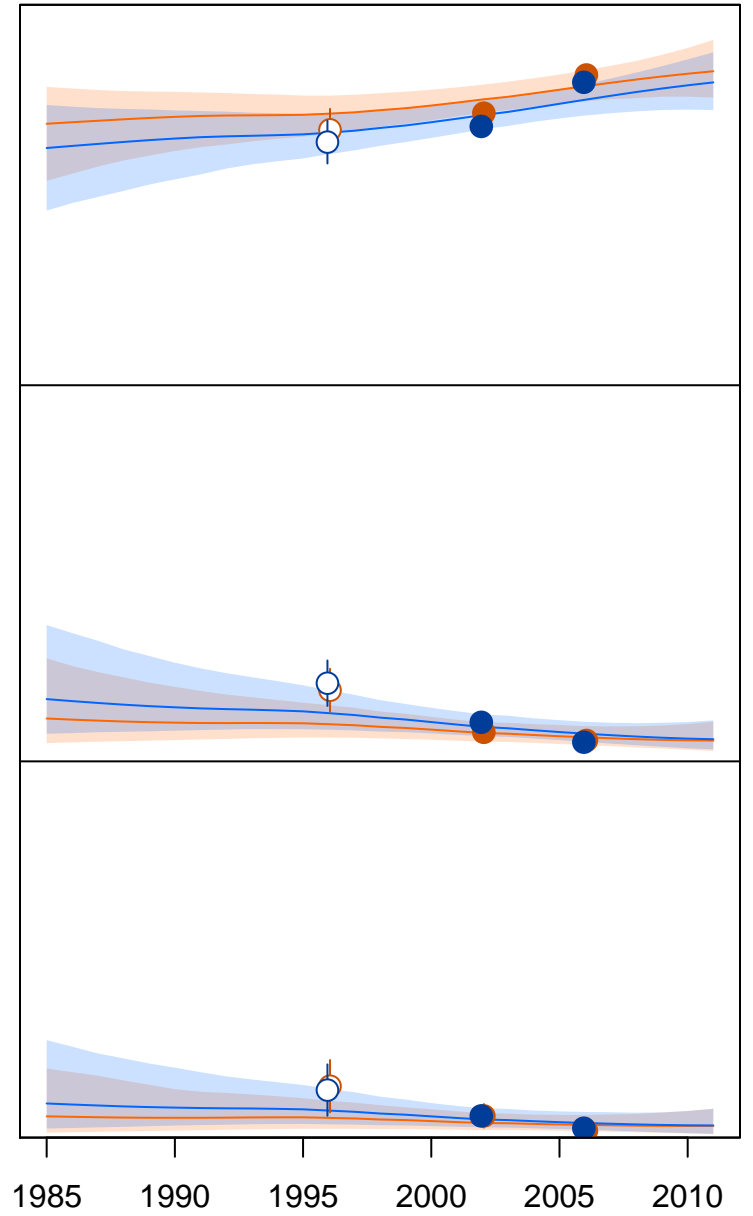

# Vanuatu Oceania Region

183

## HAZ

## WAZ

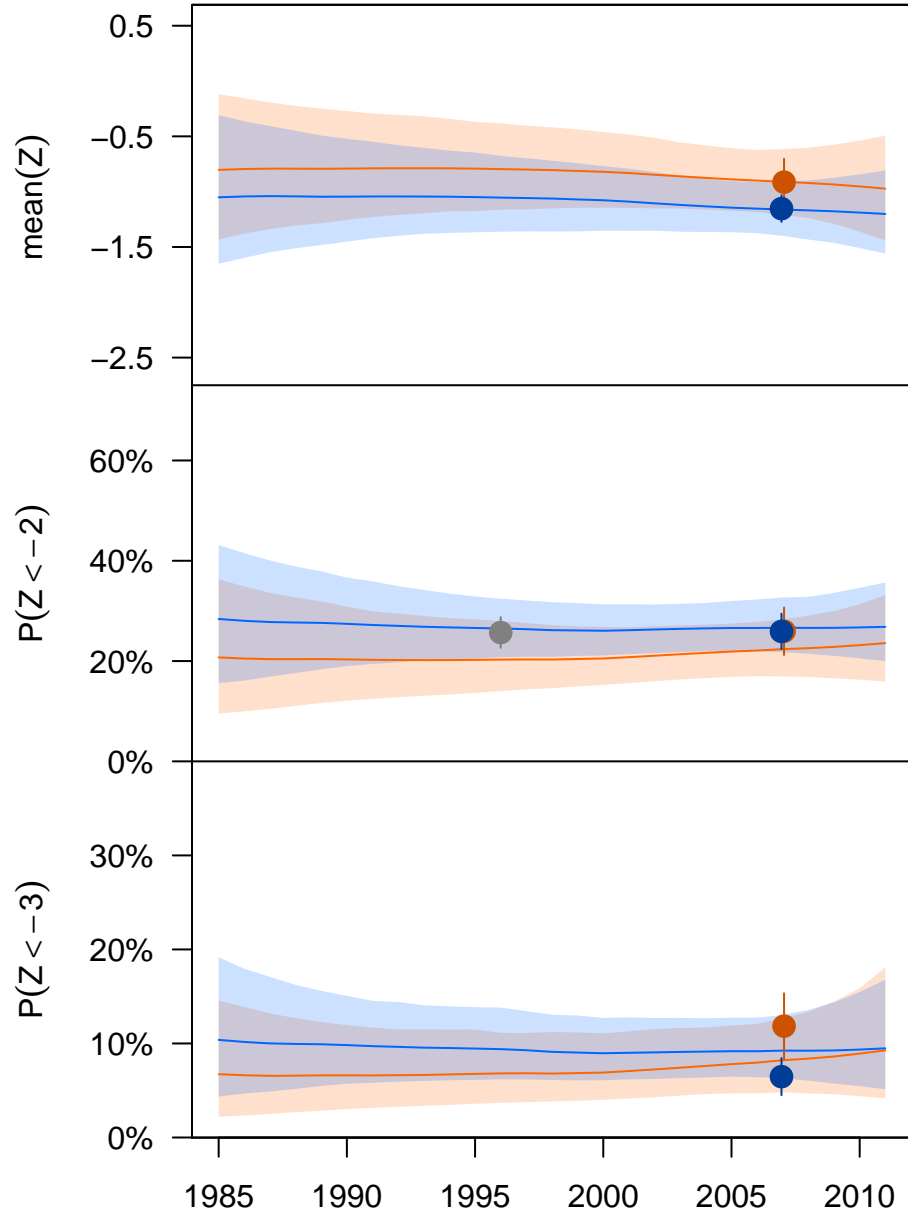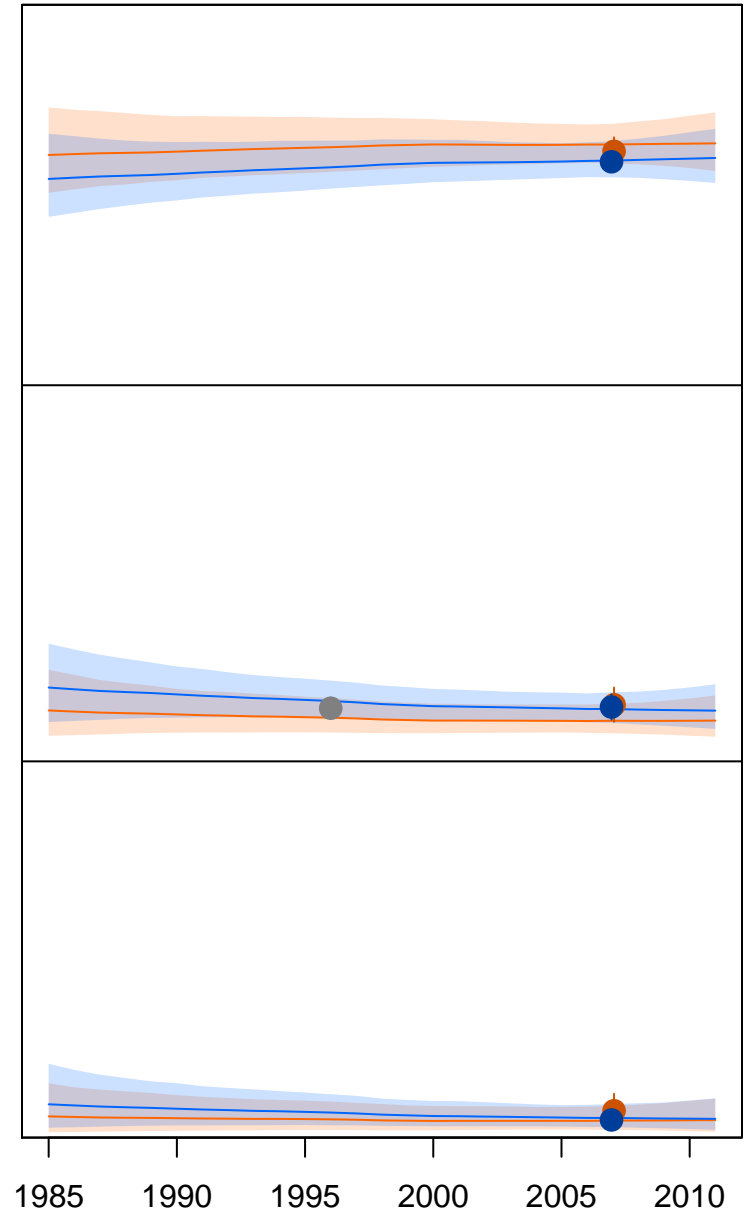



# Venezuela (Bolivarian Republic of)

Andean and Central Latin America and Caribbean Region

### HAZ

### WAZ

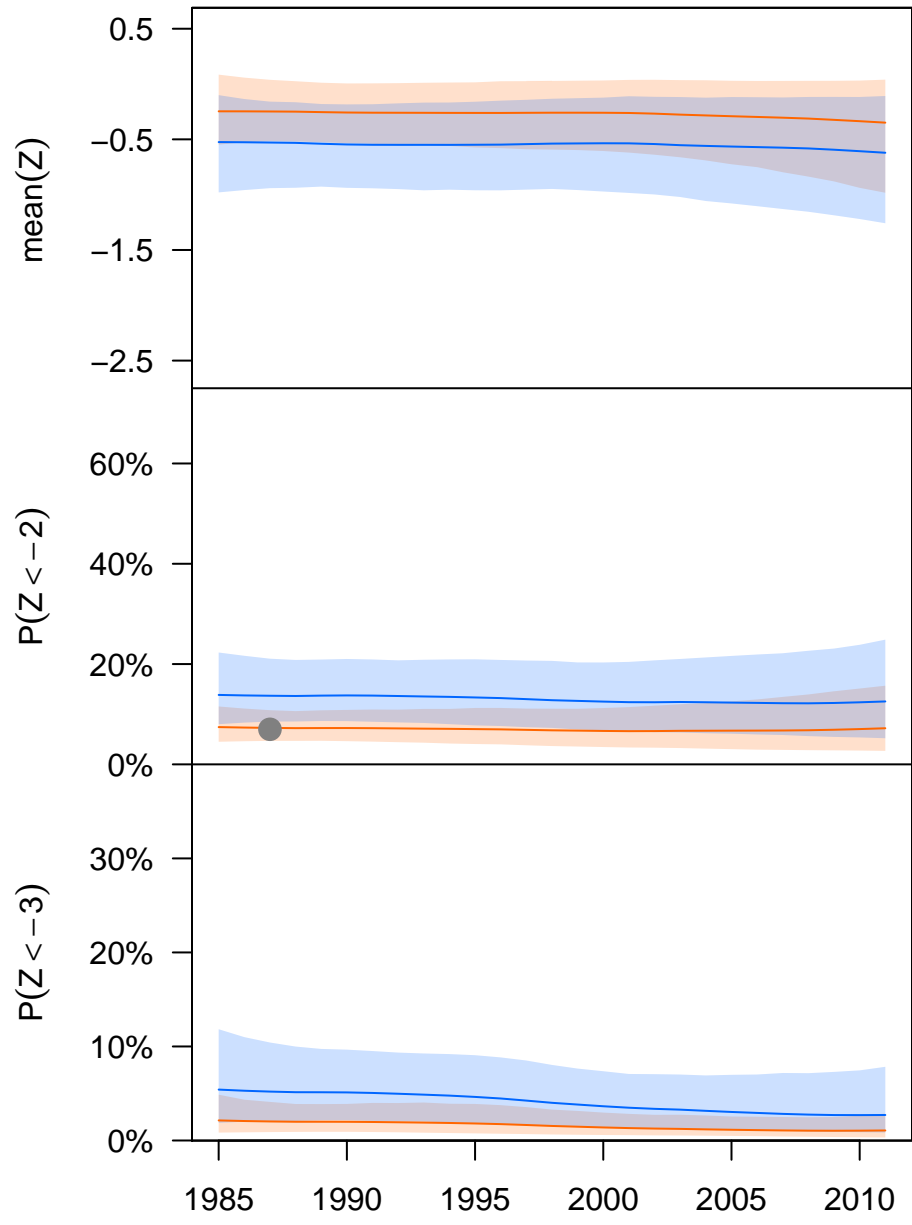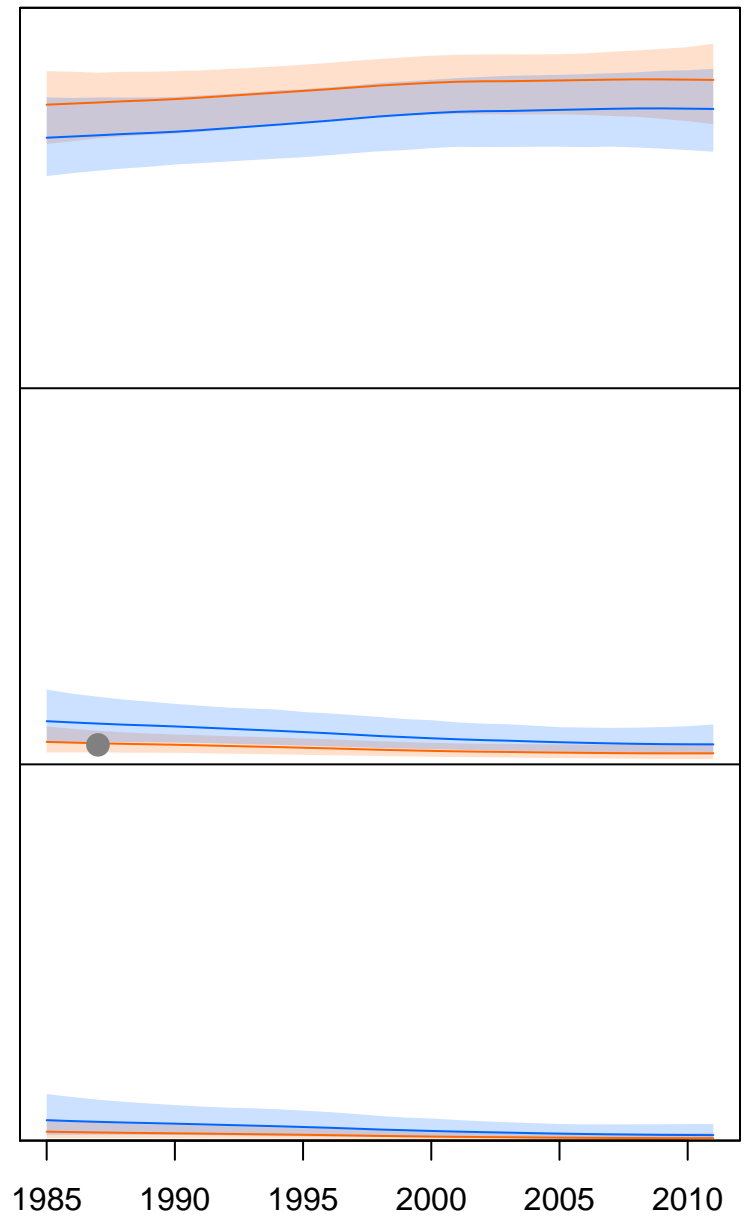

# Viet Nam

## East and Southeast Asia Region

### HAZ

### WAZ

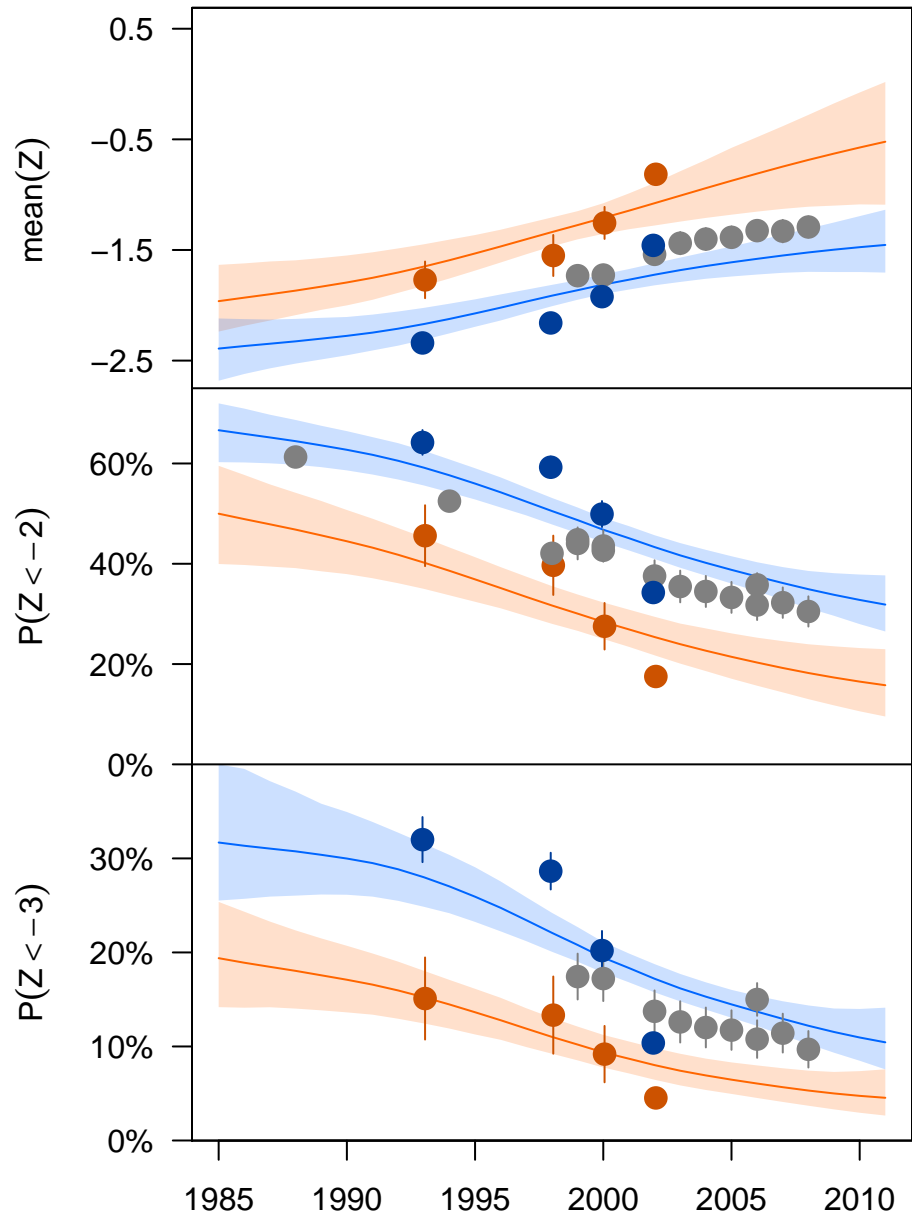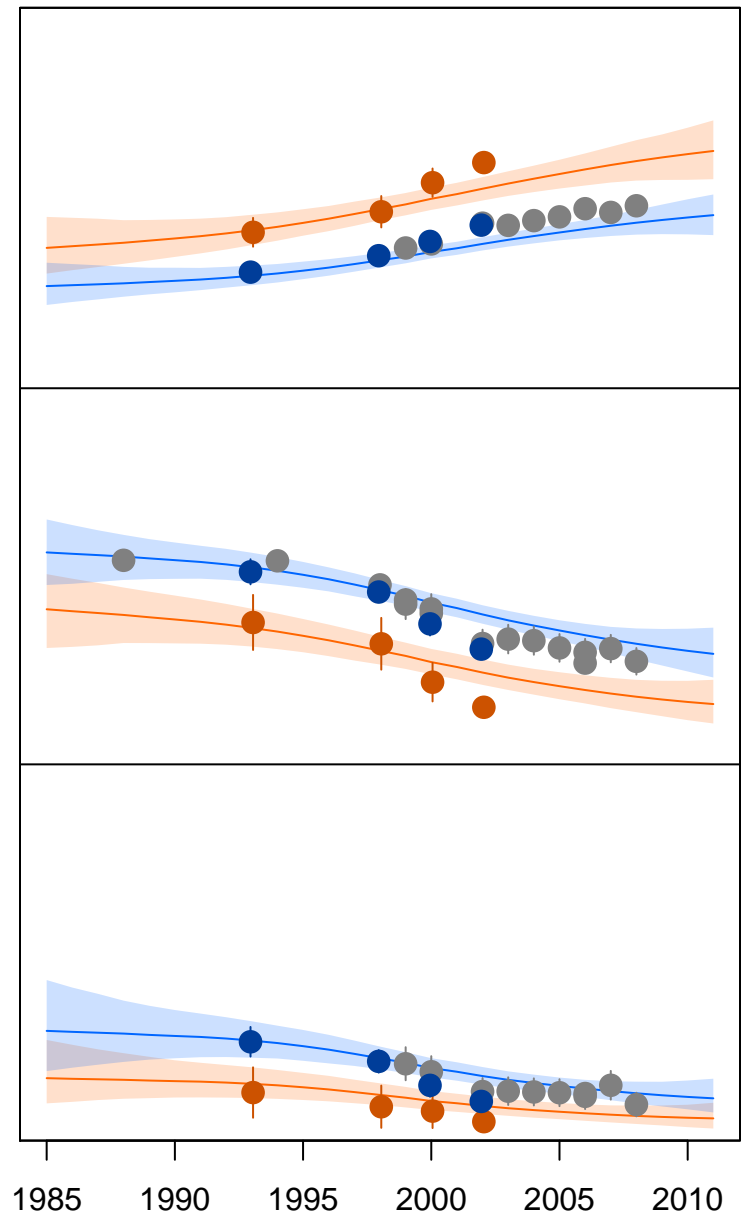

# Yemen

Central Asia, Middle East, and North Africa Region

### HAZ

### WAZ

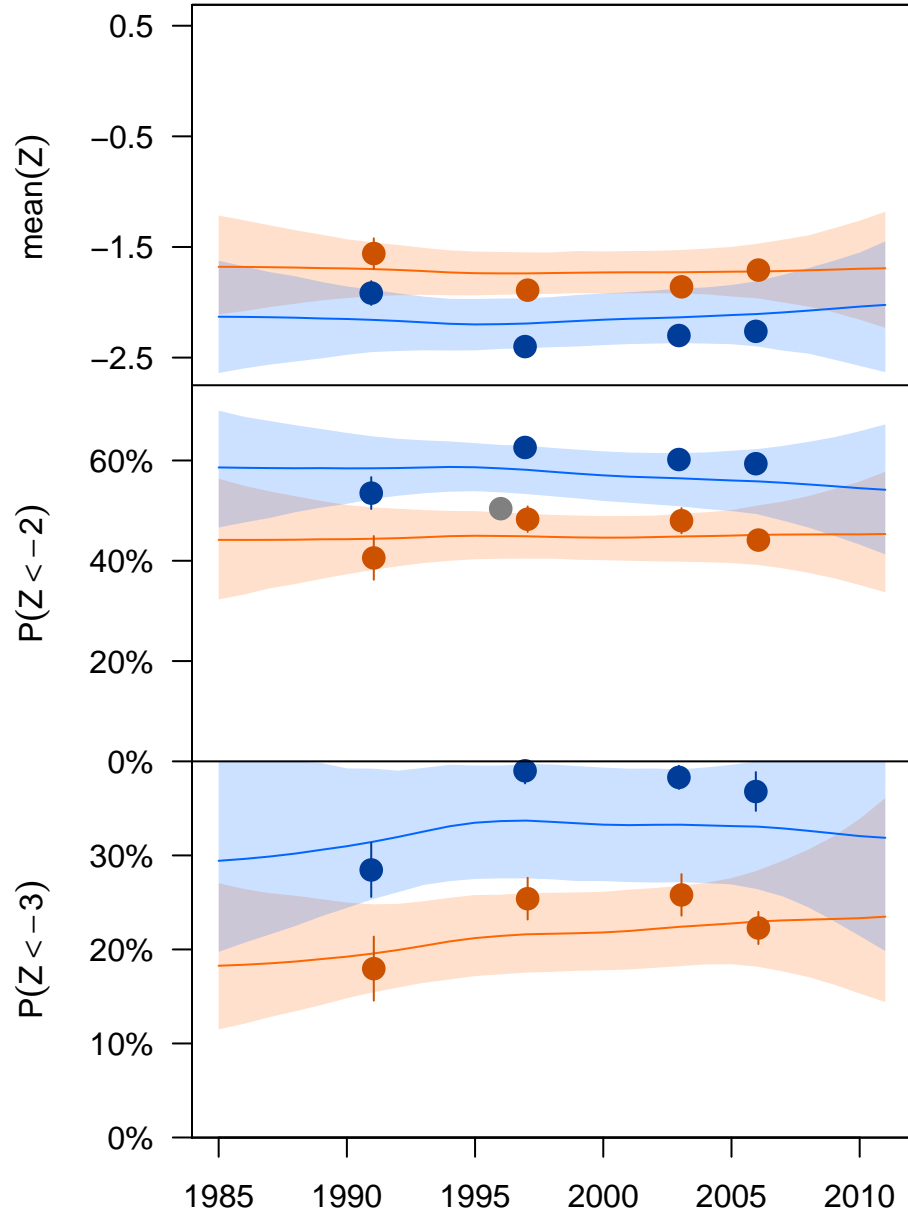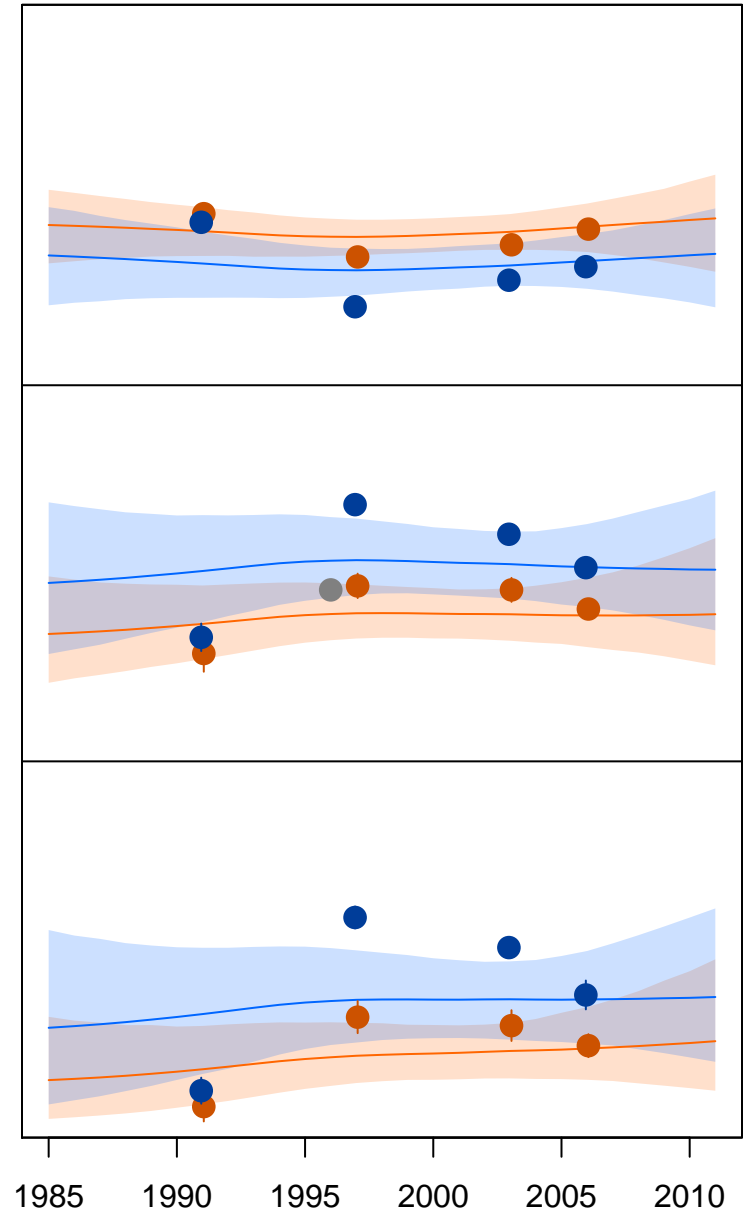

# Zambia

## Sub-Saharan Africa Region

HAZ

WAZ

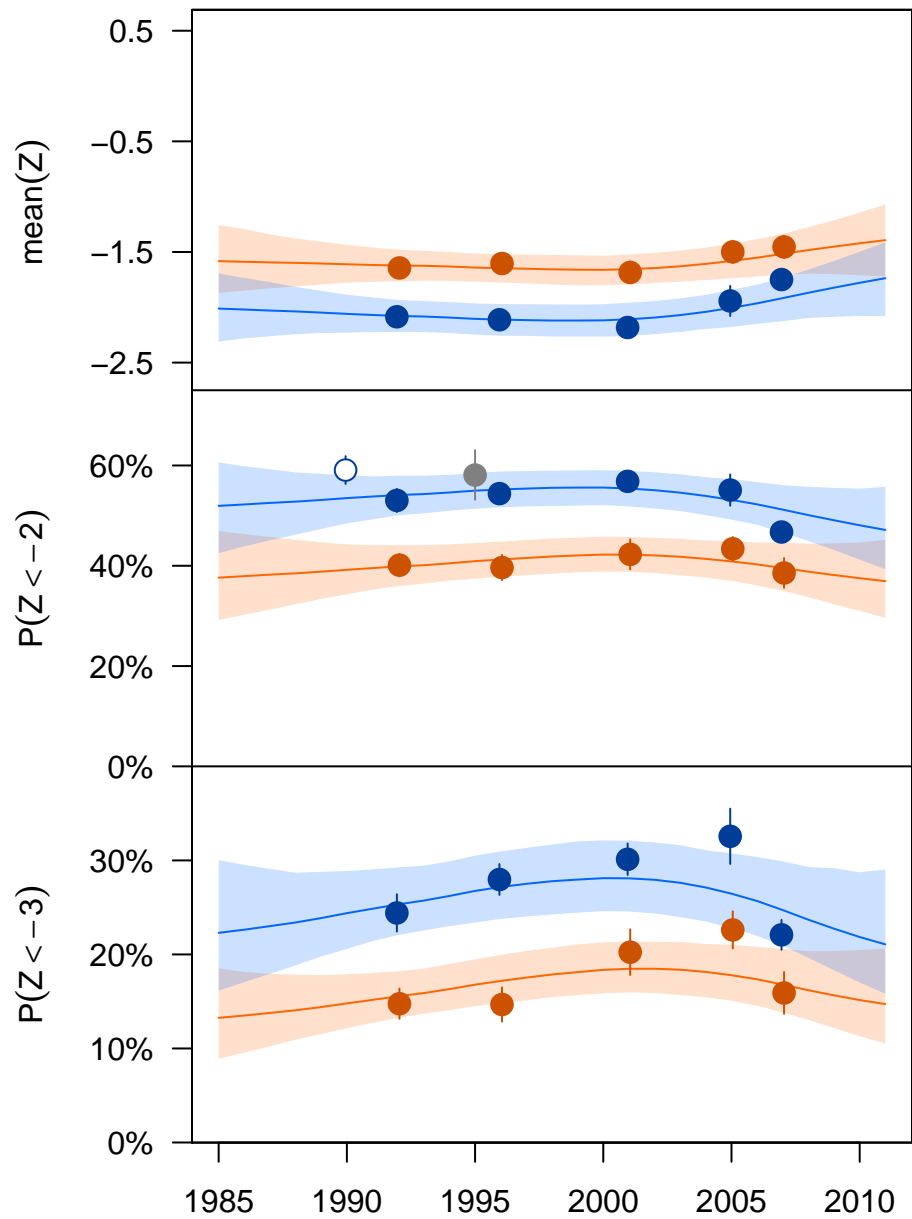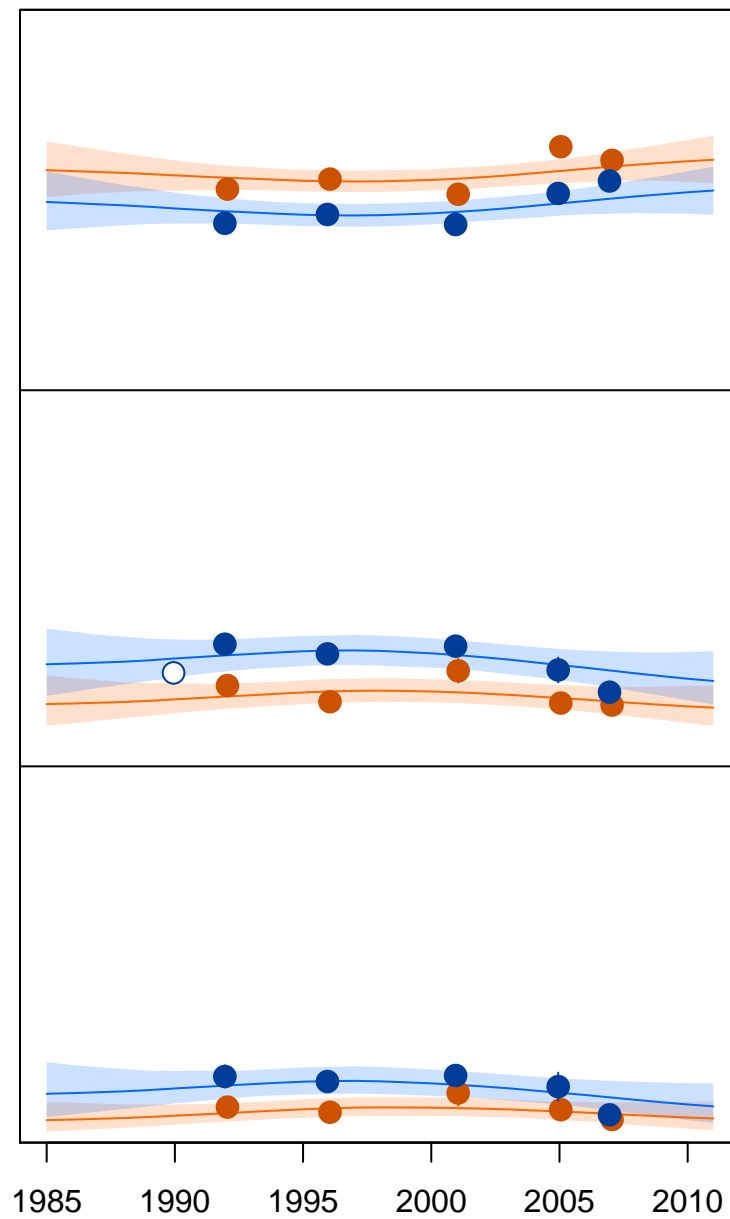

# Zimbabwe

## Sub-Saharan Africa Region

### HAZ

### WAZ

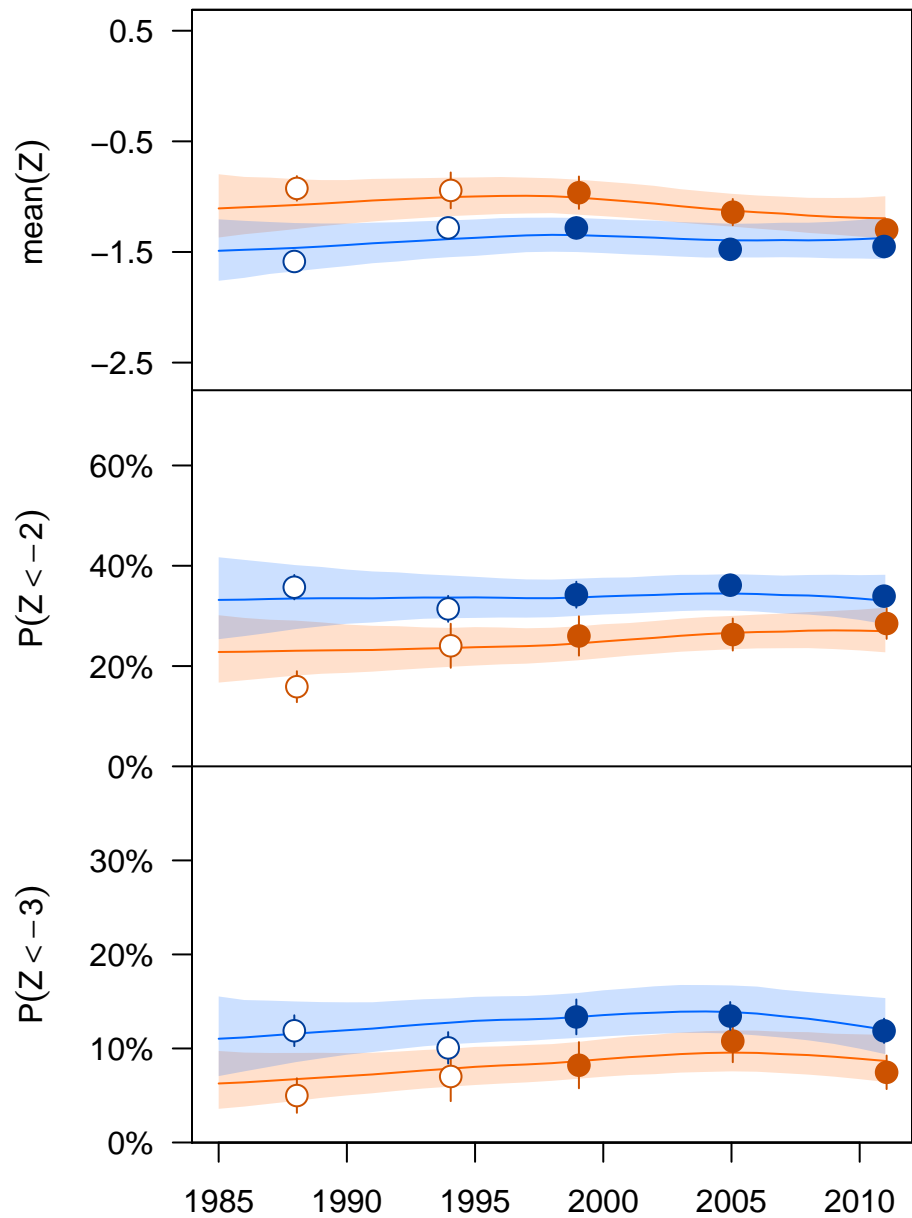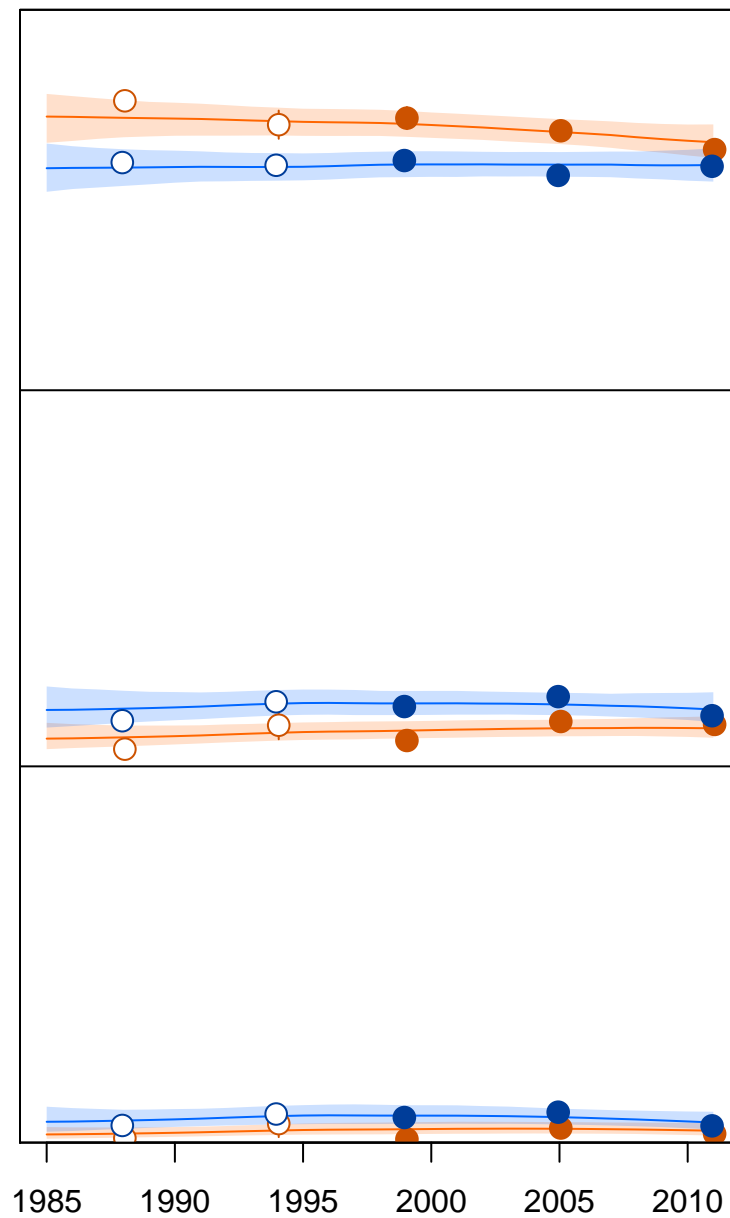

Supplement: mmc1.pdf [file mmc1.pdf]
